# Supplementary material for: Global Oct4 target gene analysis reveals novel downstream PTEN and TNC genes required for drug-resistance and metastasis in lung cancer
Source: PubMed Central journal article supplement — Nucleic Acids Res. 2015 Jan 21;43(3):1593–608. doi: 10.1093/nar/gkv024 (PMC4330385; doi:10.1093/nar/gkv024), 2015-01-21
Supplement: supp_gkv024_nar-03005-x-2014-File010.pdf [file supp_gkv024_nar-03005-x-2014-File010.pdf]

## Supplementary Data

### Global Oct4 target gene analysis reveals novel downstream *PTEN* and *TNC* genes required for drug-resistance and metastasis in lung cancer

Yen-An Tang, Chi-Hsin Chen, H. Sunny Sun, Chun-Pei Cheng, Vincent S. Tseng, Han-Shui Hsu, Wu-Chou Su, Wu-Wei Lai, Yi-Ching Wang

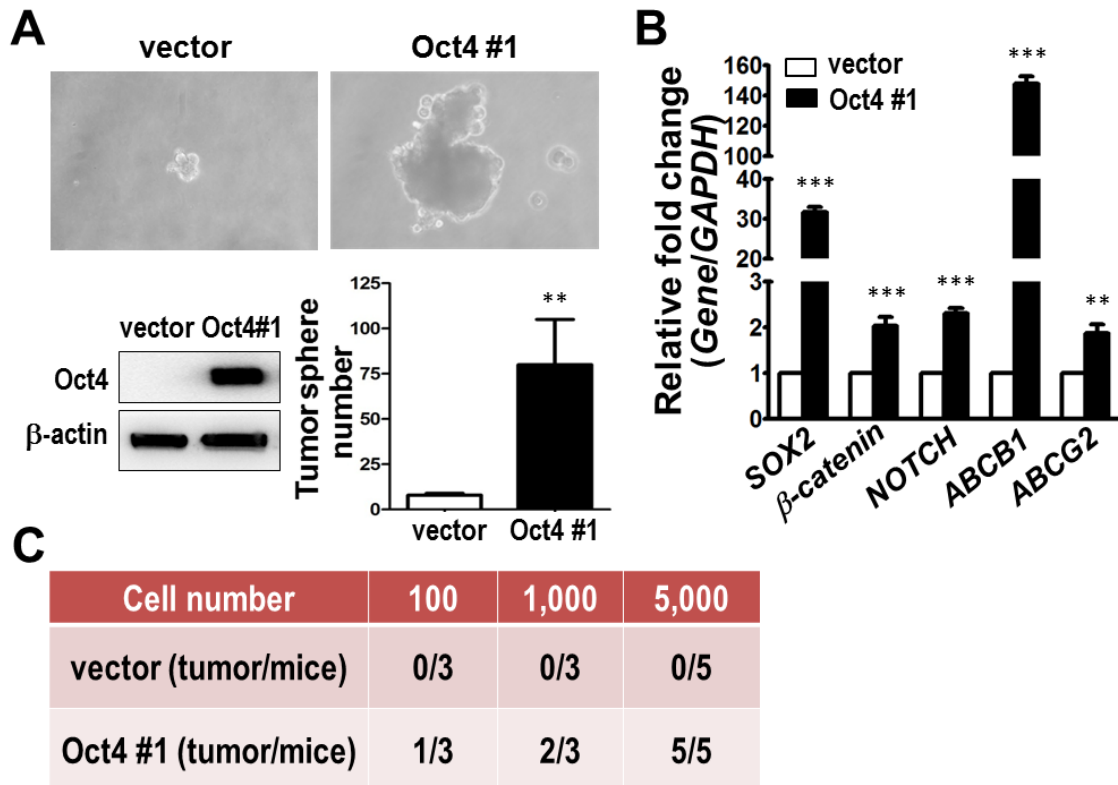

#### Supplementary Figure S1. Ectopic expression of Oct4 induces self-renewal and stemness-related gene expression in lung cancer cells.

(A) *In vitro* tumor sphere formation assay of A549 lung cancer cells stably expressing Flag-tagged Oct4 (Oct4#1) or empty vector (vector) photographed (top panel) and quantified (lower right panel). The immunoblots confirmed the Oct4 expression in A549 stable clones (lower left panel). (B) qRT-PCR analysis of stemness-related genes of stable cells expressing Oct4 compared to vector control cells. *GAPDH* was used as internal control. Data are mean  $\pm$ s.e.m. (n = 3). *P* values determined using two-tailed Student's *t*-test. \*\*, *P*<0.01; \*\*\*, *P*<0.001. (C) *In vivo* tumor formation assay using limited cell number (100, 1000, and 5000 cells) of vector and stable cells expressing Oct4. Cells were mixed with matrigel and subcutaneously injected into BALB/c nude mice. Tumor incidence of mice was analyzed at 8 weeks after implantation.

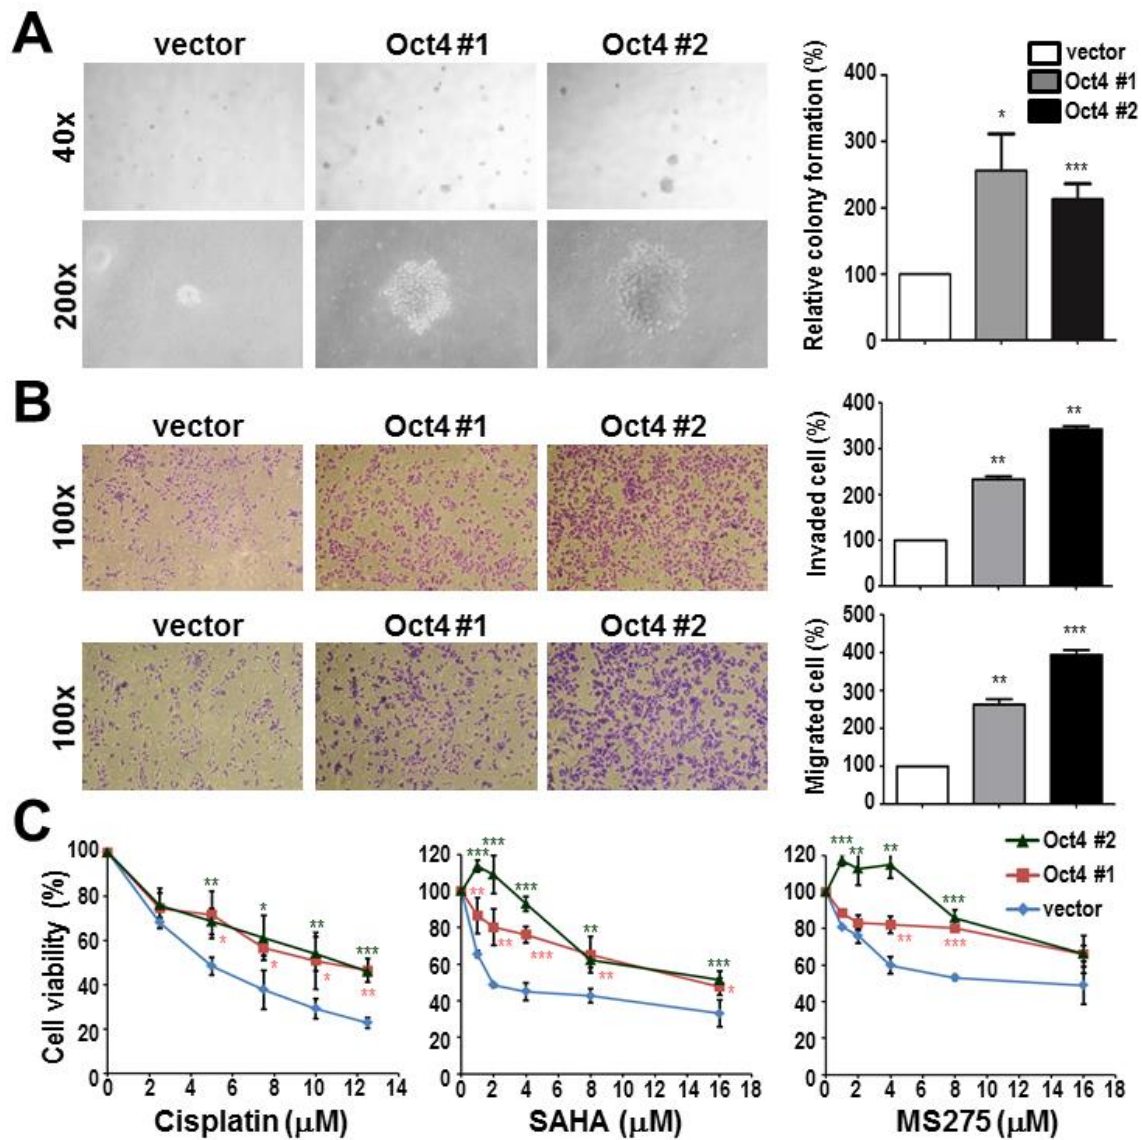

**Supplementary Figure S2. Ectopic expression of Oct4 induces anchorage-independent growth, cell motility and drug resistance in lung cancer cells.**

(A) Anchorage-independent growth analysis of A549 lung cancer cells stably expressing Flag-Oct4 (Oct4#1 and Oct4#2) or empty vector (vector). Results from one representative experiment are shown (left panel). Original magnification is indicated. The colony number was quantified (right panel). (B) Transwell invasion (top panel) and migration (lower panel) analysis of A549 stable clones (vector, Oct4#1, and Oct4#2). Results from one representative experiment are shown (left panels). Original magnification is indicated. The relative migrated and invaded cells were quantified (right panels). (C) MTT assay was performed using A549 stable clones (vector, Oct4#1, and Oct4#2) treated with different concentration of cytotoxic drug cisplatin or histone deacetylase inhibitors, SAHA and MS275, for 48 h. Data are mean  $\pm$  s.e.m. (n = 3). *P* values determined using two-tailed Student's *t*-test. \*, *P*<0.05; \*\*, *P*<0.01; \*\*\*, *P*<0.001.

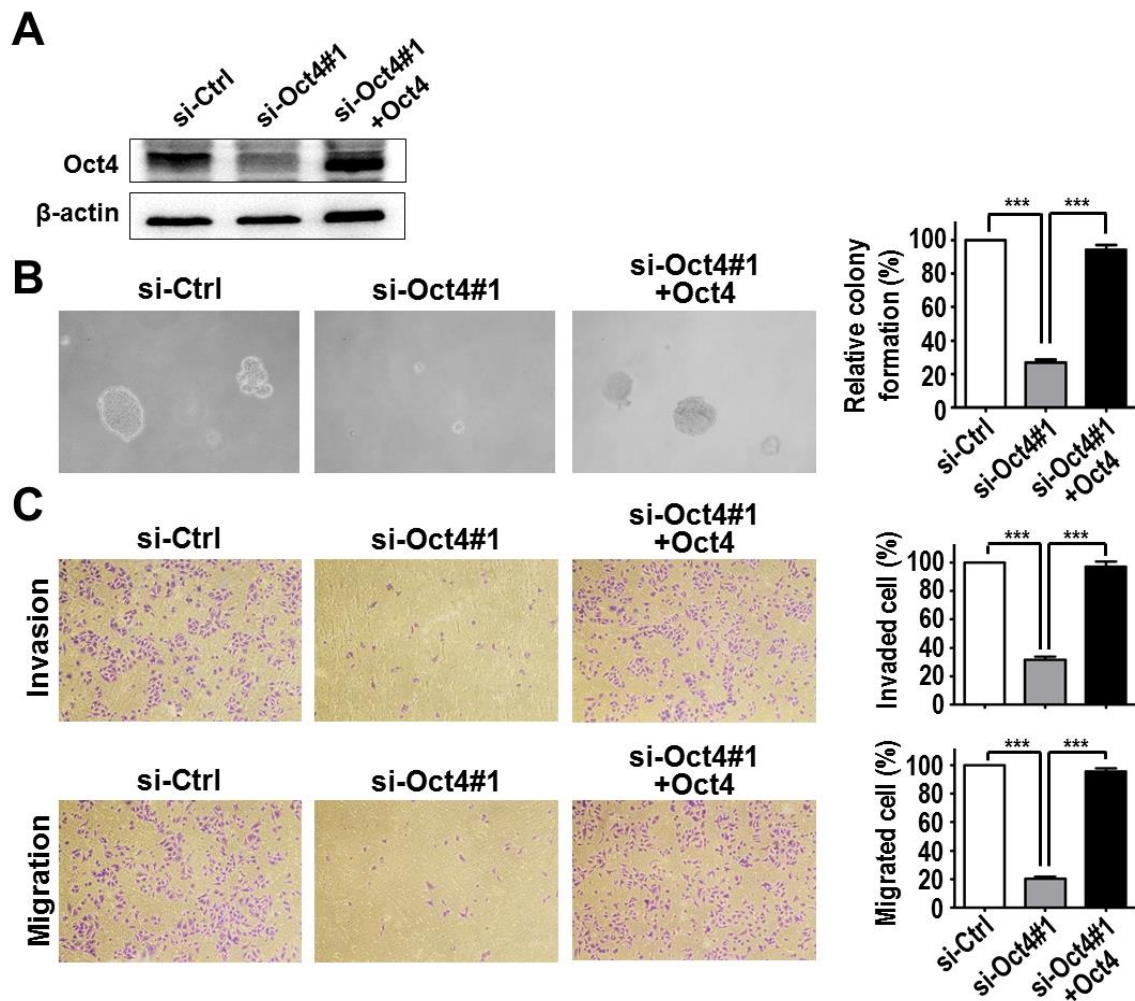

**Supplementary Figure S3. Re-enforced Oct4 expression restores the effects of si-Oct4 on cell growth and motility in A549 lung cancer cells.**

(A) A549 lung cancer cells were transiently transfected with control (si-Ctrl) or Oct4 (si-Oct4#1) siRNAs for 24 h, followed by ectopic Oct4 expression (+Oct4) for another 24 h. Cells were then subjected to Western blot analysis of Oct4 protein level.  $\beta$ -actin was used as internal control. (B) Anchorage-independent growth analysis of A549 cells from (A). Results from one representative experiment are shown (left panel). Original magnification  $\times 100$ . The colony number was quantified (right panel). (C) Transwell invasion (top panel) and migration (lower panel) analysis of A549 cells from (A). Results from one representative experiment are shown (left panels). Original magnification  $\times 100$ . The relative invaded and migrated cells were quantified (right panels). Data are mean  $\pm$  s.e.m. ( $n = 3$ ).  $P$  values determined using two-tailed Student's  $t$ -test. \*\*\*,  $P < 0.001$ .

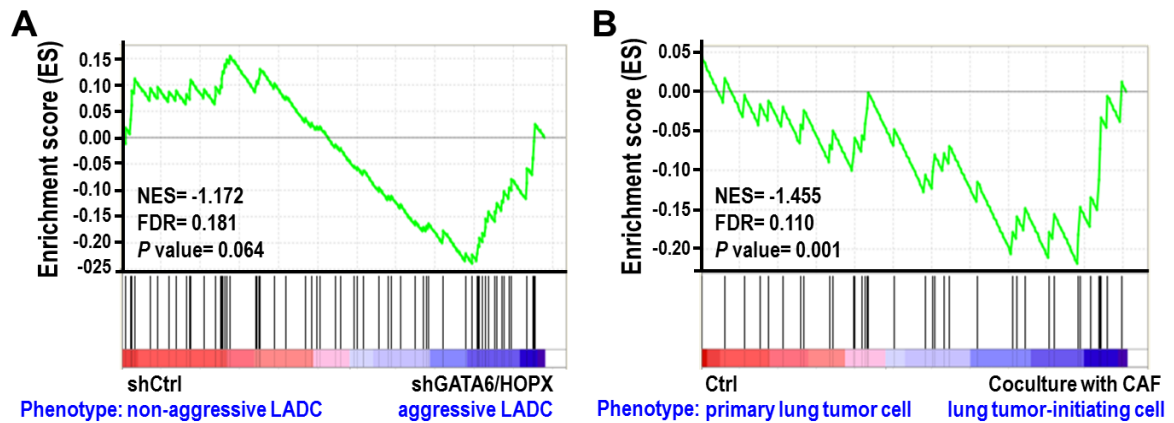

**Supplementary Figure S4. Gene set enrichment analysis (GSEA) of the correlation between Oct4-target genes and aggressive gene signatures of lung cancer.** Oct4-target gene set comprising Oct4-bound top 150, promoter-associated, and enhancer-associated genes were used in GSEA to assess the correlation to **(A)** an aggressive gene signature of lung adenocarcinoma (LADC) by knocking down of both *GATA6* and *HOPX* genes (27) and **(B)** a gene signature of lung tumor-initiating cells promoting by co-culturing with cancer-associated fibroblasts (CAFs) (28). NES, normalized enrichment score; FDR, false discovery rate. *P* values determined using a random permutation test.

**A** IP-Western blot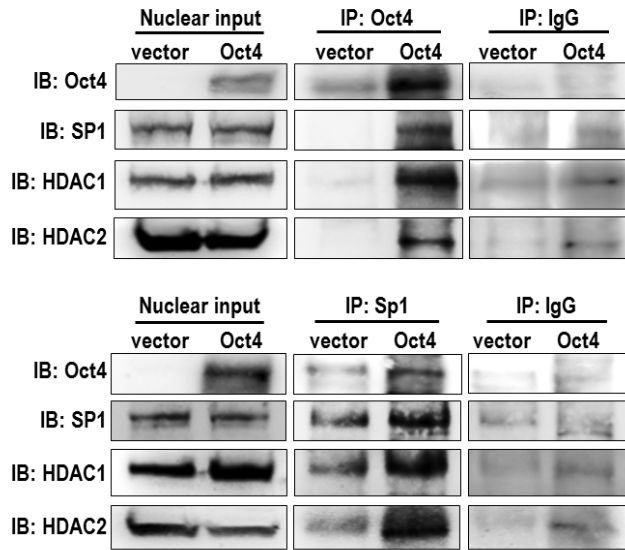**B** qChIP-PCR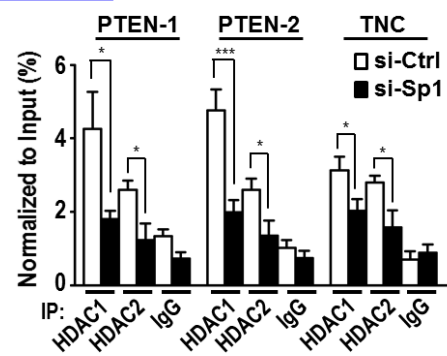**C** qChIP-PCR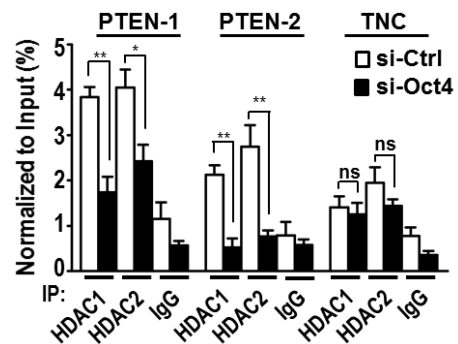

**Supplementary Figure S5. Oct4 forms a complex with Sp1 and HDAC1/2 in the presence of *PTEN* promoter, but not *TNC* promoter.**

(A) Nuclear lysates of A549 cells stably expressing Oct4 (Oct4) or control (vector) were immunoprecipitated (IP) using anti-Oct4 (upper) or anti-Sp1 (lower) antibody. The immunoprecipitated proteins were analyzed by immunoblot (IB) using indicated antibodies. Normal IgG served as negative control. (B and C) qChIP-PCR analysis of HDAC1 and HDAC2 occupancies at *PTEN* and *TNC* promoters in A549 cells stably expressing Oct4 after knockdown of Sp1 (si-Sp1) (B) or Oct4 (si-Oct4) (C) compared to si-control (si-Ctrl). ns, non-significant. Data are mean  $\pm$  s.e.m. (n = 3). *P* values determined using two-tailed Student's *t*-test. \*, *P* < 0.05; \*\*, *P* < 0.01; \*\*\*, *P* < 0.001.

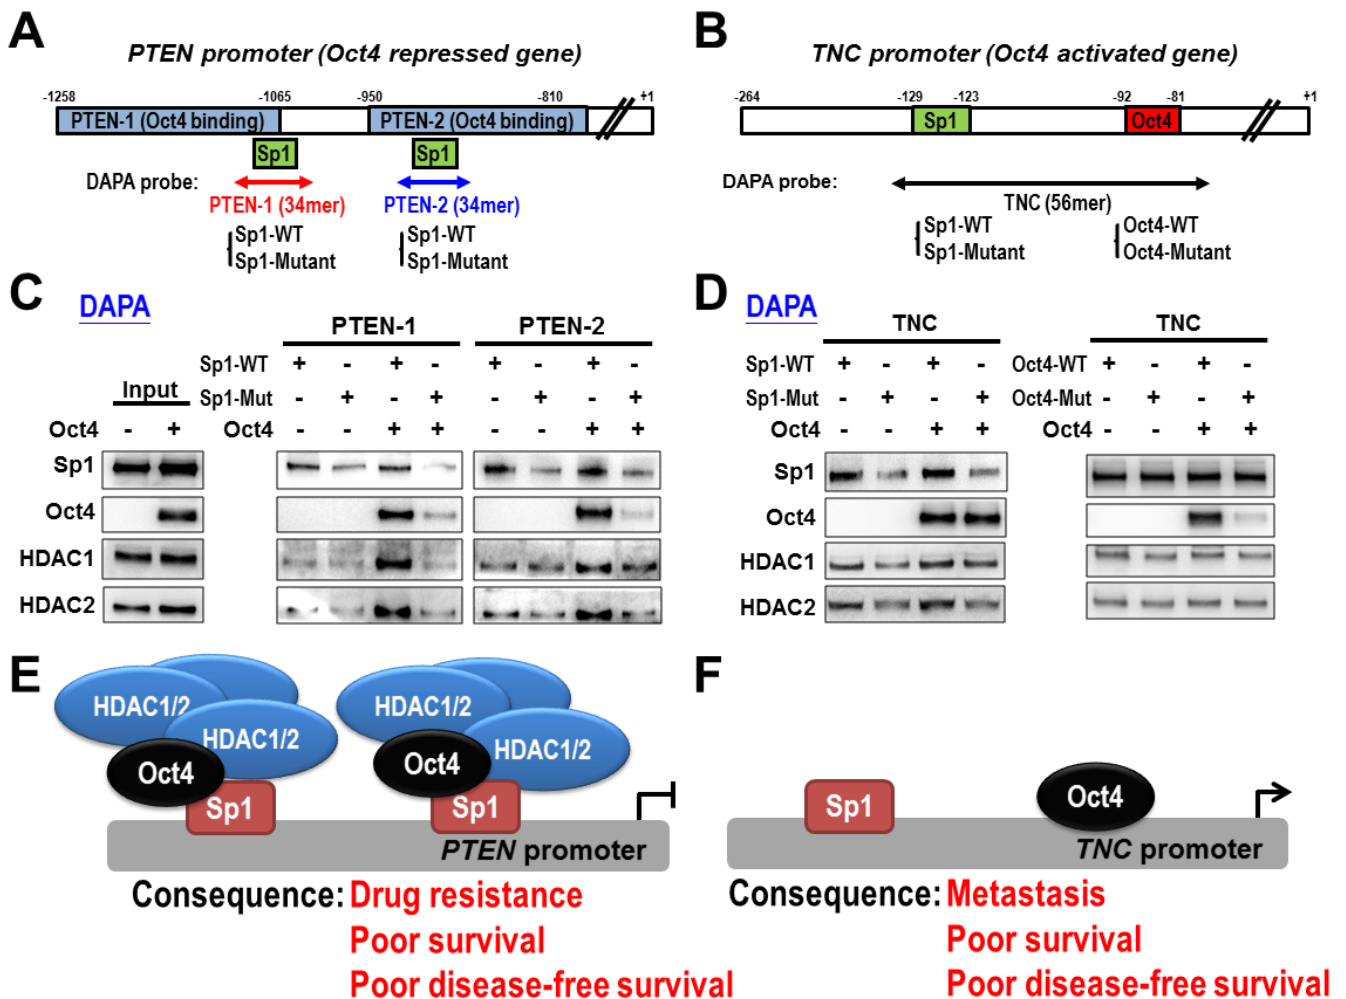

**Supplementary Figure S6. Differential targeting of Oct4 and Sp1 at *PTEN* and *TNC* promoter.**

(A and B) Promoter regions of *PTEN* (A) and *TNC* (B) were analyzed. Oct4 ChIP-seq regions (blue; PTEN-1 and PTEN-2), Sp1 binding site (green), and Oct4 binding site (red) are shown in boxes. DAPA probes containing wild-type (WT) and mutant (Mut) Sp1 or Oct4 binding sites were indicated by double headed arrow. The length of DAPA probe was indicated in parentheses. (C) DAPA assay showed that Oct4-mediated recruitment of the HDAC1/2 complex to *PTEN* promoter required Sp1 protein to serve as a platform. DAPA assay was performed using DNA probes (PTEN-1 and PTEN-2) containing WT or Mut Sp1 binding site in parental A549 cells upon Oct4 overexpression. (D) DAPA assay showed that Oct4 bound to *TNC* promoter in an Sp1-independent manner and did not recruit the HDAC1/2 complex. DAPA assay was performed using DNA probes (TNC) containing WT or Mut Sp1 binding site (left) and Oct4 binding site (right) in parental A549 cells upon Oct4 overexpression. (E and F) Working models of differential targeting of Oct4, Sp1, and HDAC1/2 complex at *PTEN* (E) and *TNC* (F) promoters in relation to cancer progression. All experiments were performed at least three times. Results from one representative experiment are shown.

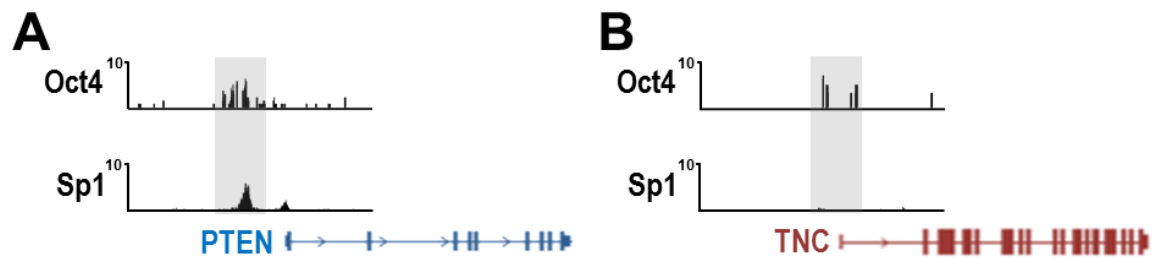

**Supplementary Figure S7. Coordinative binding of Oct4 and Sp1 at *PTEN* promoter, but not *TNC* promoter.** Configurations of Oct4 binding (data from our Oct4 ChIP-seq) and Sp1 binding (data from the Sp1 ChIP-seq of A549 lung cancer cells in ENCODE datasets) peaks at promoters of *PTEN* (A) and *TNC* (B) genes.

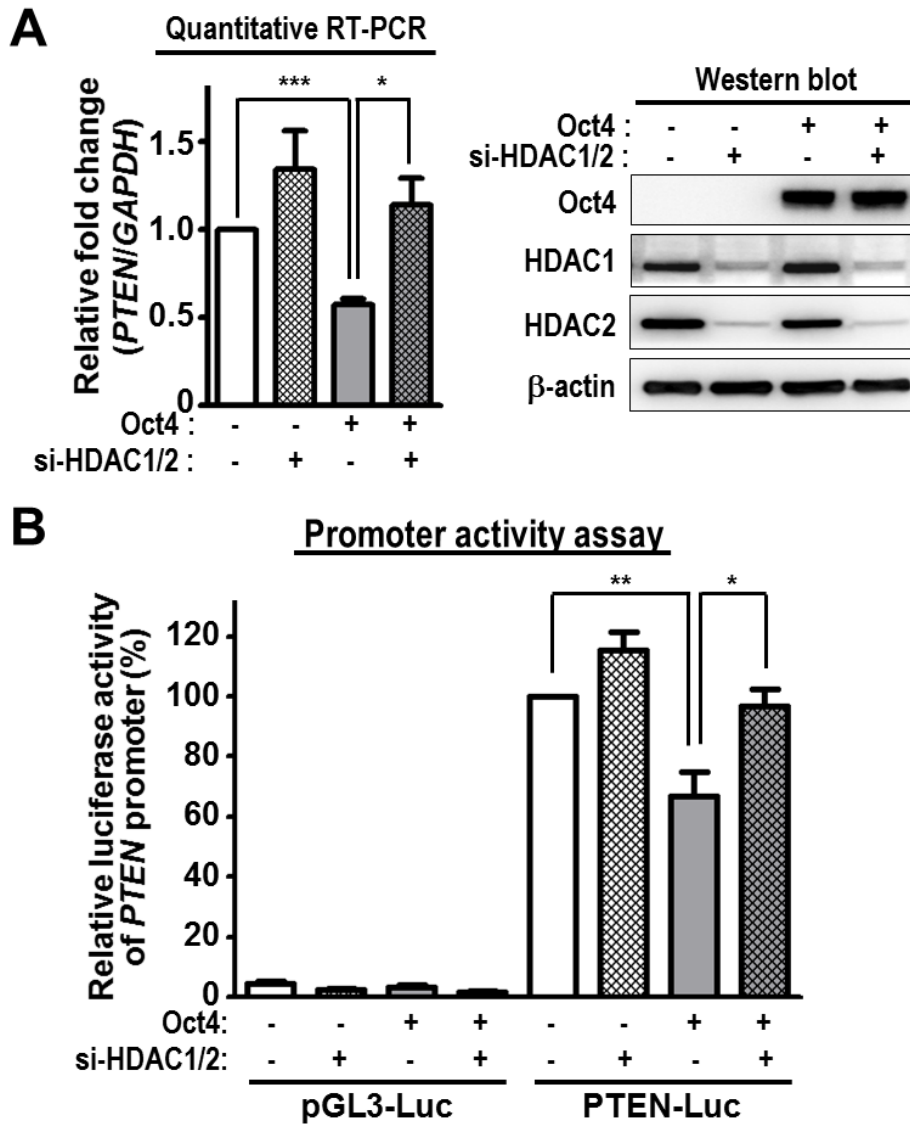

**Supplementary Figure S8. Oct4 transcriptionally represses *PTEN* in an HDAC1/2-dependent manner.**

(A) qRT-PCR analysis of *PTEN* mRNA expression in A549 cells overexpressing Oct4 (Oct4) and/or knockdown of HDAC1/2 (si-HDAC1/2) (left). Western blot analysis confirmed the efficiency of Oct4 overexpression and HDAC1/2 knockdown (right). (B) Dual luciferase activity assays were performed using wild-type *PTEN* promoter (-1352 ~ +141 region) in A549 cells upon overexpression of Oct4 (Oct4) and/or knockdown of HDAC1/2 (si-HDAC1/2). Data are mean  $\pm$  s.e.m. (n = 3). *P* values determined using two-tailed Student's *t*-test. \*, *P* < 0.05; \*\*, *P* < 0.01; \*\*\*, *P* < 0.001.



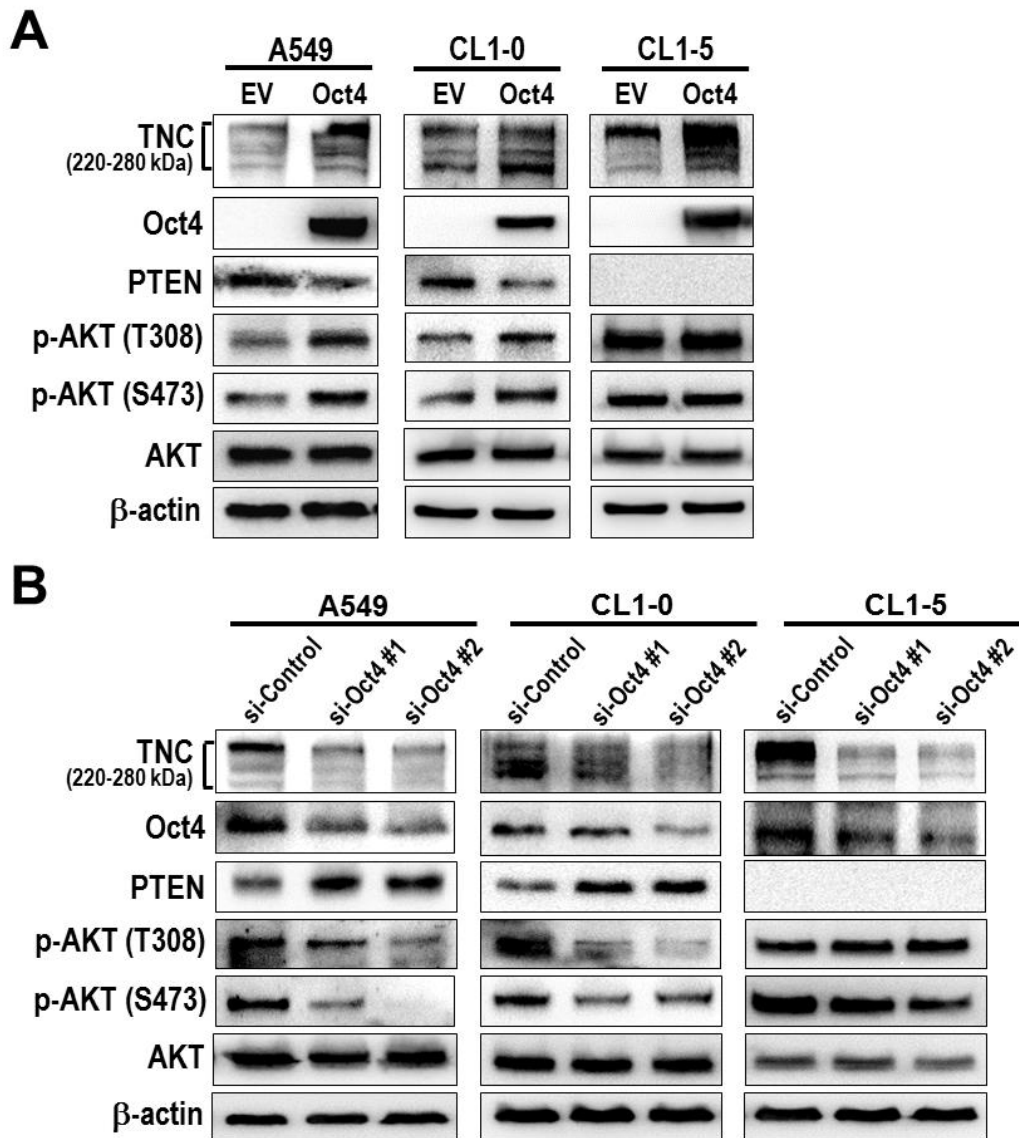

**Supplementary Figure S9. Oct4 induces TNC protein expression, while decreases PTEN protein level and increases AKT phosphorylation in lung cancer cell lines.**

(A) A549, CL1-0, and CL1-5 lung cancer cells were transiently transfected with empty vector (EV) and Flag-Oct4 (Oct4) for 24 h and then subjected to Western blot analysis of TNC, PTEN, and AKT phosphorylation levels.  $\beta$ -actin was used as internal control. (B) A549, CL1-0, and CL1-5 lung cancer cells were transiently transfected with control (si-Control) and Oct4 (si-Oct4#1 and si-Oct4#2) siRNAs for 48 h and then subjected to Western blot analysis of TNC, PTEN, AKT and AKT phosphorylation levels.  $\beta$ -actin was used as internal control. All experiments were performed at least three times. Results from one representative experiment are shown.

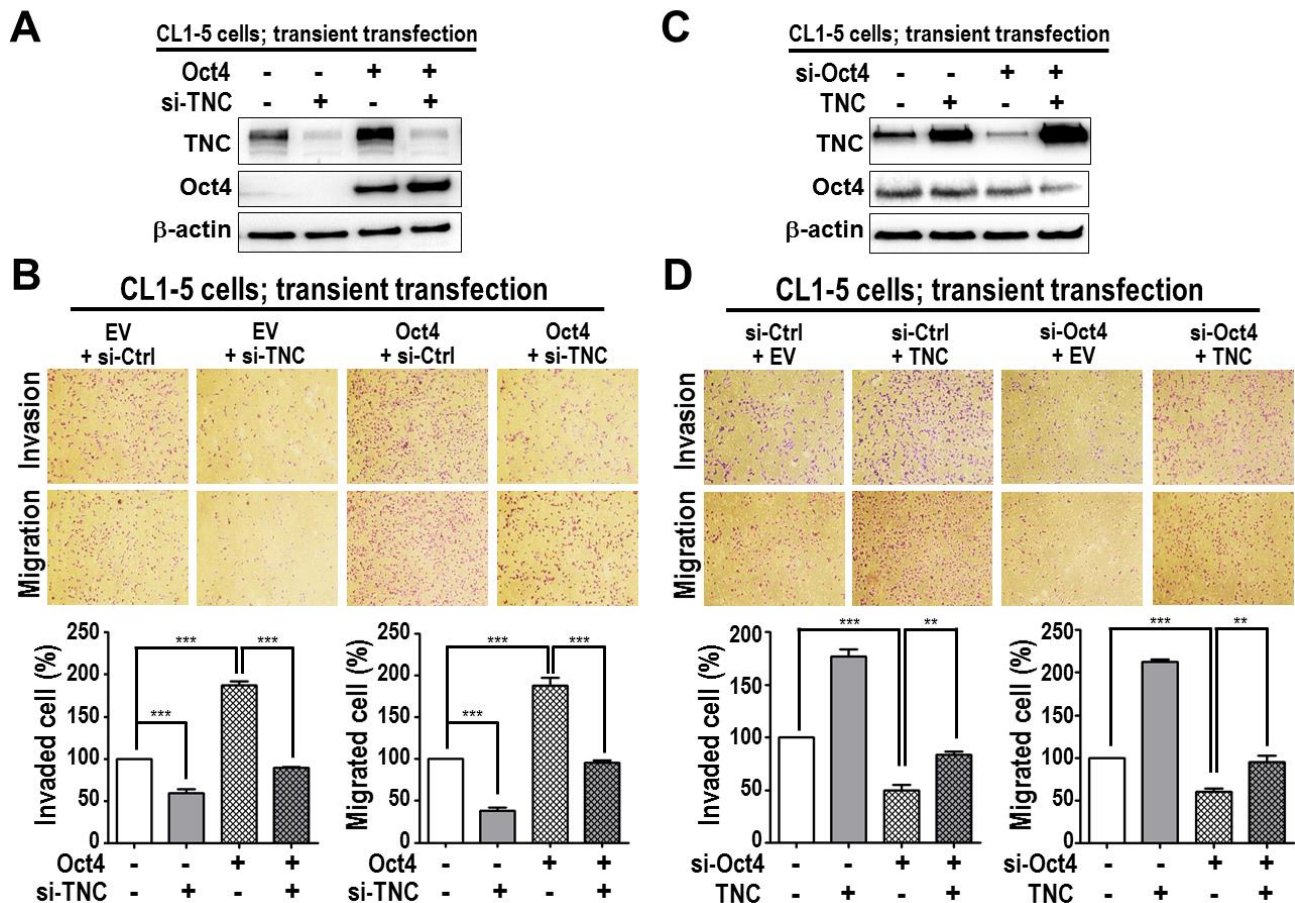

**Supplementary Figure S10. TNC expression is required for Oct4-mediated cancer invasion/migration.**

(A and B) CL1-5 cells were transiently transfected with empty vector (EV) or Oct4 expression vector (Oct4), followed by knockdown of TNC (si-TNC) or control (si-Ctrl). Cells were then subjected to Western blot analysis of TNC protein level (A) and transwell invasion/migration assay (B). (C and D) CL1-5 cells with transient Oct4 (si-Oct4) or control (si-Ctrl) knocked down were transfected with TNC expression vector (TNC) or empty vector (EV). Cells were then subjected to Western blot analysis of TNC protein level (C) and transwell invasion/migration assay (D). Representative image of transwell invasion/migration assay (B and D, upper) and quantitation (B and D, lower) are shown. Original magnification  $\times 100$ . Data are mean  $\pm$  s.e.m. (n = 3). *P* values determined using two-tailed Student's *t*-test. \*\*,  $P < 0.01$ ; \*\*\*,  $P < 0.001$ .

**Supplementary Table S1.** The plasmids and their characteristics used in the current study.

| Plasmid            | Target                              | Insert (bp) | Function                | Source             |
|--------------------|-------------------------------------|-------------|-------------------------|--------------------|
| pPyCAGIP vector    | None                                | 0           | Vector control          | From Dr. Ying Jin* |
| pPyCAGIP-Flag-Oct4 | Wild type Oct4                      | 1083        | Overexpression          | From Dr. Ying Jin* |
| SFB-tagged vector  | None                                | 0           | Vector control          | From Dr. Maddika†  |
| SFB-tagged-PTEN    | Wild type PTEN                      | 1212        | Overexpression          | From Dr. Maddika†  |
| pCMVscript vector  | None                                | 0           | Vector control          | From Dr. Pringle§  |
| pCMVscript-TNC     | Wild type TNC                       | 6606        | Overexpression          | From Dr. Pringle§  |
| pCDNA3-HA-Neo      | None                                | 0           | Vector control          | From Dr. Hung‡     |
| pCDNA3-HA-Sp1      | Wild type Sp1                       | 2358        | Overexpression          | From Dr. Hung‡     |
| pGL3-Basic vector  | None                                | 0           | Vector control          | Promega            |
| pGL3-TNC promoter  | <i>TNC</i> promoter (-176 ~ +94)    | 270         | Promoter activity assay | Homemade           |
| pGL3-PTEN promoter | <i>PTEN</i> promoter (-1352 ~ +141) | 1493        | Promoter activity assay | Homemade           |

\* Plasmid was kindly provided by Dr. Ying Jin from Shanghai Stem Cell Institute, Shanghai Jiao Tong University School of Medicine, Shanghai, China.

† Plasmid was kindly provided by Dr. Subbareddy Maddika at Laboratory of Cell Death & Cell Survival, Centre for DNA Fingerprinting and Diagnostics (CDFD), Nampally, India.

§ Plasmid was kindly provided by Dr. J Howard Pringle at Department of Cancer Studies and Molecular Medicine, Infirmery Close, University of Leicester, Leicester, UK.

‡ Plasmid was kindly provided by Dr. Jan-Jong Hung at Institute of Biosignal Transduction, College of Bioscience and Biotechnology, National Cheng-Kung University, Tainan, Taiwan.

**Supplementary Table S2.** siRNA sequences used in the current study.

| <b>RNAi</b>                        | <b>Function</b>  | <b>Double-stranded RNA sequences (5' → 3')</b>                                                                   | <b>Source</b> |
|------------------------------------|------------------|------------------------------------------------------------------------------------------------------------------|---------------|
| Oct4-HSS109091<br>(si-Oct4#1)      | Knock-down Oct4  | AUC UGC UGC AGU GUG GGU UUC GGG C<br>GCC CGA AAC CCA CAC UGC AGC AGA U                                           | Invitrogen    |
| Oct4 siRNA<br>(si-Oct4#2)          | Knock-down Oct4  | AGC AGC UUG GGC UCG AGA AdTdT<br>UUC UCG AGC CCA AGC UGC UdTdT                                                   | Invitrogen    |
| Sp1-HSS110106                      | Knock-down Sp1   | GGA ACA UCA CCU UGC UAC CUG UCA A<br>UUG ACA GGU AGC AAG GUG AUG UUC C                                           | Invitrogen    |
| HDAC1-HSS103017                    | Knock-down HDAC1 | UAC UUU AGC AGU UCC AGG AUG GCC A<br>UGG CCA UCC UGG AAC UGC UAA AGU A                                           | Invitrogen    |
| HDAC2-HSS142909                    | Knock-down HDAC2 | UUU AGC AUG ACC UUU GAC UGU UAG A<br>UCU AAC AGU CAA AGG UCA UGC UAA A                                           | Invitrogen    |
| AKT1-HSS100345                     | Knock-down AKT1  | AUU CUU GAG GAG GAA GUA GCG UGG C<br>GCC ACG CUA CUU CCU CCU CAA GAA U                                           | Invitrogen    |
| PTEN-L003023-00-0020<br>SMART pool | Knock-down PTEN  | GAU CAG CAU ACA CAA AUU A<br>GAC UUA GAC UUG ACC UAU A<br>GAU CUU GAC CAA UGG CUA A<br>CGA UAG CAU UUG CAG UAU A | Dharmacon     |
| TNC-HSS105145                      | Knock-down TNC   | UUU CUC GGC UGU CAG GAG GAC AUU G<br>CAA UGU CCU CCU GAC AGC CGA GAA A                                           | Invitrogen    |

**Supplementary Table S3.** The antibodies and their reaction condition used in the current study.

| <b>Target</b>                    | <b>kDa</b> | <b>Raised In</b> | <b>Application</b> | <b>Dilution</b> | <b>Source</b>  | <b>Catalog No.</b> |
|----------------------------------|------------|------------------|--------------------|-----------------|----------------|--------------------|
| AKT                              | 60         | Rabbit           | Western blot       | 1:1000          | Cell signaling | 9272               |
| AKT<br>Thr308<br>phosphorylation | 60         | Rabbit           | Western blot       | 1:500           | Cell signaling | 2965               |
| AKT<br>Ser473<br>phosphorylation | 60         | Rabbit           | Western blot       | 1:1000          | Cell signaling | 9272               |
| $\beta$ -actin                   | 43         | Mouse            | Western blot       | 1:5000          | Abcam          | ab-6276            |
| Bad                              | 25         | Mouse            | Western blot       | 1:500           | Santa Cruz     | sc-8044            |
| Bak                              | 30         | Rabbit           | Western blot       | 1:500           | Santa Cruz     | sc-7873            |
| Bcl-2                            | 26         | Mouse            | Western blot       | 1:500           | Santa Cruz     | sc-7382            |
| Bcl-XL                           | 30         | Mouse            | Western blot       | 1:500           | Santa Cruz     | sc-8392            |
| Caspase 3<br>Cleaved form        | 17<br>19   | Rabbit           | Western blot       | 1:500           | Cell signaling | 9661               |
| GFP-Tag                          | 30         | Rabbit           | Western blot       | 1:1000          | GeneTex        | GTX26556           |
| GSK3 $\beta$                     | 46         | Rabbit           | Western blot       | 1:1000          | Cell signaling | 9315               |

| Target                                  | kDa | Raised In | Application          | Dilution | Source            | Catalog No.  |
|-----------------------------------------|-----|-----------|----------------------|----------|-------------------|--------------|
| GSK3 $\beta$<br>Ser9<br>phosphorylation | 46  | Rabbit    | Western blot         | 1:2000   | Novus Biologicals | NB 100-81948 |
| HA-Tag                                  | --* | Rabbit    | ChIP <sup>†</sup>    | 1:100    | GeneTex           | GTX29110     |
| HDAC1                                   | 65  | Rabbit    | Western blot         | 1:2000   | Abcam             | ab-7028      |
|                                         |     |           | ChIP <sup>†</sup>    | 1:100    |                   |              |
| HDAC2                                   | 65  | Rabbit    | Western blot         | 1:2000   | Abcam             | ab-7029      |
|                                         |     |           | ChIP <sup>†</sup>    | 1:100    |                   |              |
| Histone H3<br>K9K14 acetylation         | 17  | Rabbit    | Western blot         | 1:2000   | Millipore         | 06-599       |
| Oct4                                    | 43  | Rabbit    | Western blot         | 1:2000   | Abcam             | ab-19857     |
|                                         |     |           | Immunohistochemistry | 1:200    |                   |              |
| Oct4                                    | 43  | Mouse     | ChIP <sup>†</sup>    | 1:30     | Santa Cruz        | sc-5279      |
|                                         |     |           | Western blot         | 1:500    |                   |              |
| PTEN                                    | 54  | Rabbit    | Immunoprecipitation  | 1:125    | Cell signaling    | 9559         |
|                                         |     |           | Western blot         | 1:1000   |                   |              |
|                                         |     |           | Immunohistochemistry | 1:50     |                   |              |

| <b>Target</b> | <b>kDa</b>  | <b>Raised In</b> | <b>Application</b>                   | <b>Dilution</b> | <b>Source</b> | <b>Catalog No.</b> |
|---------------|-------------|------------------|--------------------------------------|-----------------|---------------|--------------------|
| Sp1           | 95          | Rabbit           | Western blot<br>Immunoprecipitation  | 1:1000          | Millipore     | 07-645             |
| Sp1           | 95          | Rabbit           | ChIP <sup>†</sup>                    | 1:100           | Active Motif  | 39058              |
| TNC           | 220-<br>280 | Rabbit           | Western blot<br>Immunohistochemistry | 1:500<br>1:100  | Santa Cruz    | sc-20932           |

\* --, Molecular weight is variable.

<sup>†</sup> ChIP, chromatin-immunoprecipitation.

**Supplementary Table S4.** The primers and DNA probes used in the current study.

| <b>Gene</b>   | <b>Primer</b> | <b>Sequences (5'→ 3')</b>       | <b>Application*</b> | <b>PCR size (bp)</b> | <b>Tm (°C)</b> |
|---------------|---------------|---------------------------------|---------------------|----------------------|----------------|
| GAPDH mRNA    | Forward       | GAG TCA ACG GAT TTG GTC GT      | qRT-PCR             | 238                  | 60             |
|               | Reverse       | TTG ATT TTG GAG GGA TCT CG      |                     |                      |                |
| TNC mRNA      | Forward       | TGG GAG ATC ATC TTC CGG AAT     | qRT-PCR             | 150                  | 60             |
|               | Reverse       | CCC CGG GTA TTG TTT TTC ACT     |                     |                      |                |
| HDAC4 mRNA    | Forward       | AAT CTG AAC CAC TGC ATT TCC A   | qRT-PCR             | 123                  | 60             |
|               | Reverse       | CAG GAC CGG GTG GTT ATA GGA     |                     |                      |                |
| MAPK4 mRNA    | Forward       | TGC TCC TTT CCC CCA ATA ACT     | qRT-PCR             | 200                  | 60             |
|               | Reverse       | GCT GAC AAA GGA AGG CAT CAC     |                     |                      |                |
| PAX6 mRNA     | Forward       | TAA TCG AAG GGC CAA ATG GA      | qRT-PCR             | 130                  | 60             |
|               | Reverse       | GGG TTG TGG AAT TGG TTG GT      |                     |                      |                |
| EOMES mRNA    | Forward       | CTG CCT ACC AAA ACA CCG ATA TT  | qRT-PCR             | 200                  | 60             |
|               | Reverse       | GGT CTG TGG CAC GGT TCT CT      |                     |                      |                |
| JARID2 mRNA   | Forward       | ACA AAG GCG TCC TCA ATG ACT T   | qRT-PCR             | 150                  | 60             |
|               | Reverse       | GCC TCC AGT ACT CTT GCT CGA T   |                     |                      |                |
| HNRNPUL1 mRNA | Forward       | AAG TCC ACC AAT AGC CGG TTT     | qRT-PCR             | 130                  | 60             |
|               | Reverse       | CCA TCC ACT TTC CAT TCT TGG TA  |                     |                      |                |
| LAMB1 mRNA    | Forward       | ACA ACC AGG TGG TGT CAT TAT CAC | qRT-PCR             | 130                  | 60             |
|               | Reverse       | ACG TCG CTA TCA GAG GAG GTG TA  |                     |                      |                |
| PLEC mRNA     | Forward       | GGA GGA TGC GTT TCC ACA AG      | qRT-PCR             | 151                  | 60             |
|               | Reverse       | TGC AGA ATG ATT GTC CAG ATG AG  |                     |                      |                |



| <b>Gene</b> | <b>Primer</b> | <b>Sequences (5'→ 3')</b>             | <b>Application*</b> | <b>PCR size (bp)</b> | <b>Tm (°C)</b> |
|-------------|---------------|---------------------------------------|---------------------|----------------------|----------------|
| CAD mRNA    | Forward       | TGG AAC TGC TTT TCG ATA TCT TTC T     | qRT-PCR             | 150                  | 60             |
|             | Reverse       | CCT TTC GTG GTG GTG GAA GT            |                     |                      |                |
| GSK3A mRNA  | Forward       | AAA GCT CAC CCC TGG ACA AA            | qRT-PCR             | 150                  | 60             |
|             | Reverse       | CAG ACA TCG CAG TTC ATC AAA GA        |                     |                      |                |
| PRKDC mRNA  | Forward       | ACT GGA TCC TCG GGA TTG G             | qRT-PCR             | 150                  | 60             |
|             | Reverse       | GAG TTA GCC GAA AAG GCA TCA           |                     |                      |                |
| USP47 mRNA  | Forward       | CAG CAT GAT GTA CAA GAA CTA TGC A     | qRT-PCR             | 150                  | 60             |
|             | Reverse       | TCG CCA GCC CTC ATA ACC               |                     |                      |                |
| PTEN mRNA   | Forward       | CGA CGG GAA GAC AAG TTC AT            | qRT-PCR             | 163                  | 60             |
|             | Reverse       | AGG TTT CCT CTG GTC CTG GT            |                     |                      |                |
| DKK3 mRNA   | Forward       | GGT CTT TTC AGA GAC AGT TAT CAC ATC T | qRT-PCR             | 124                  | 60             |
|             | Reverse       | GGTGTACTGGAAGCTGGCAAA                 |                     |                      |                |
| FBXO31 mRNA | Forward       | GCG AAA ACT TGC GGA AGC T             | qRT-PCR             | 121                  | 60             |
|             | Reverse       | CCT CCG TAT GGC CCG ATA T             |                     |                      |                |
| MAT1A mRNA  | Forward       | GTG CAT GCC CCT CAC CAT               | qRT-PCR             | 122                  | 60             |
|             | Reverse       | TGT ACT GAA CTG TCA CCT GAG TCT TAG A |                     |                      |                |
| FOXO4 mRNA  | Forward       | CTT TGA GCC AGA TCC CTG AG            | qRT-PCR             | 344                  | 60             |
|             | Reverse       | TTC CAA CAG CAT TGC TCA TC            |                     |                      |                |
| CASZ1 mRNA  | Forward       | CCA TCG ACC CCT CCT TTA CA            | qRT-PCR             | 150                  | 60             |
|             | Reverse       | CAA ACT CTC GTA GCA GGT CCT AGA A     |                     |                      |                |

| Gene         | Primer  | Sequences (5'→ 3')                     | Application* | PCR size (bp) | Tm (°C) |
|--------------|---------|----------------------------------------|--------------|---------------|---------|
| CELF2 mRNA   | Forward | GAG CCT TAC GGA GCC GTC TA             | qRT-PCR      | 200           | 60      |
|              | Reverse | TTG GAC TTT TCA CTA TCT GCA GGT T      |              |               |         |
| PDZD2 mRNA   | Forward | TAA GCA AAG TCC ACG CCA TCT            | qRT-PCR      | 120           | 60      |
|              | Reverse | TGC TGC GTG CTA TGA CTT CAT            |              |               |         |
| CDH15 mRNA   | Forward | CCT ACC CCC TGG TTC AGA TCA            | qRT-PCR      | 131           | 60      |
|              | Reverse | GAA GAC CTT CCC TGT GAA CTT GTC        |              |               |         |
| IL21R mRNA   | Forward | CCT GAA GAC CCA TCC ATT GTG            | qRT-PCR      | 120           | 60      |
|              | Reverse | GCA CCC ACC CAT TTC TTG AA             |              |               |         |
| RAB37 mRNA   | Forward | AGG CCT TGC TTC TGC TGT ATG            | qRT-PCR      | 120           | 60      |
|              | Reverse | TGT TGC CTA GCA GCA TGA TCA            |              |               |         |
| SOX11 mRNA   | Forward | TGT ACA TAT GTT GTG GGT TTA AGA GTC TT | qRT-PCR      | 190           | 60      |
|              | Reverse | TGT CAT GCT GAA AAC TGC TCT AAA A      |              |               |         |
| TRAPPC9 mRNA | Forward | ATG AAA AGC TTG CTG GGT CAG A          | qRT-PCR      | 120           | 60      |
|              | Reverse | TCC TTG AAC CCA CTG GAA ATC T          |              |               |         |
| HTRA3 mRNA   | Forward | GAG TTC CAA GAC AAG CAG ATC AAA        | qRT-PCR      | 150           | 60      |
|              | Reverse | CGC AAC CTC TTG CAC ATA AAT TC         |              |               |         |
| SDC1 mRNA    | Forward | CAC ACT CCC CAC ACA GAG GAT            | qRT-PCR      | 124           | 60      |
|              | Reverse | CCG AGG TTT CAA AGG TGA AGT C          |              |               |         |
| VASH1 mRNA   | Forward | ACA TCA GAG AGC TGC AGT ACA ATC A      | qRT-PCR      | 120           | 60      |
|              | Reverse | TGA TTG GCA GGG CCT CTT T              |              |               |         |

| <b>Gene</b> | <b>Primer</b> | <b>Sequences (5'→ 3')</b>          | <b>Application*</b> | <b>PCR size (bp)</b> | <b>Tm (°C)</b> |
|-------------|---------------|------------------------------------|---------------------|----------------------|----------------|
| TNC         | Forward       | CCA GGC ATC CGT CTC ACA AT         | qChIP-PCR           | 150                  | 60             |
|             | Reverse       | CTC GGC CAG GGA AGG AA             |                     |                      |                |
| HDAC4       | Forward       | GCA CAA AAT AGA AAG AAC AGA AGC AA | qChIP-PCR           | 150                  | 60             |
|             | Reverse       | TGC GTG AGC CAG TGA TGA G          |                     |                      |                |
| MAPK4       | Forward       | TAC ATC CAC TCC GCC AAC GT         | qChIP-PCR           | 150                  | 60             |
|             | Reverse       | CAT TCC AGC CAG ACA TAC CTT GT     |                     |                      |                |
| PAX6        | Forward       | TGC ATT TGC CTC CAG ACT TG         | qChIP-PCR           | 150                  | 60             |
|             | Reverse       | TGC AGC GAC TAA GGA GGA ATC        |                     |                      |                |
| EOMES       | Forward       | ACC ACA GCA GCA CCA ACA TC         | qChIP-PCR           | 120                  | 60             |
|             | Reverse       | CGC GAA CAC ACA CAT CAA AAA        |                     |                      |                |
| JARID2      | Forward       | GAG CTG CTC AAG TGC CAG ATG        | qChIP-PCR           | 142                  | 60             |
|             | Reverse       | GGA GGA AGC ACA CCC TGT TC         |                     |                      |                |
| CAD         | Forward       | GGT GCG ACT TTG CGC TAT TC         | qChIP-PCR           | 120                  | 60             |
|             | Reverse       | GCC GCA GCT CAG AGA AGG T          |                     |                      |                |
| GSK3A       | Forward       | GCT CAG CTT GTC GTA ATT CAT CTG    | qChIP-PCR           | 167                  | 60             |
|             | Reverse       | TCC AGC TGT GGC ACT TTA TCC        |                     |                      |                |
| USP47       | Forward       | TGT AGT AGG CTG GAA GAA ATT GCA T  | qChIP-PCR           | 167                  | 60             |
|             | Reverse       | ACT TGG TGC AAA AAT GAC TGA ATC    |                     |                      |                |
| POU5F1      | Forward       | AGG TGA CCA CTT CCC CAT CAG        | qChIP-PCR           | 129                  | 60             |
|             | Reverse       | ACC CCT GGT GCC GTG AA             |                     |                      |                |

| <b>Gene</b> | <b>Primer</b> | <b>Sequences (5'→ 3')</b>          | <b>Application*</b> | <b>PCR size (bp)</b> | <b>Tm (°C)</b> |
|-------------|---------------|------------------------------------|---------------------|----------------------|----------------|
| PTEN        | Forward       | CCC CGA GCA AAG GAA GAA G          | qChIP-PCR           | 150                  | 60             |
|             | Reverse       | AGG GTT CAA AAG GAG GTG GAA        |                     |                      |                |
| DKK3        | Forward       | TTT CCT GCC TGA TTG GAG AGA        | qChIP-PCR           | 132                  | 60             |
|             | Reverse       | GGA GCA GTG GAA GGG AAG TG         |                     |                      |                |
| FBXO31      | Forward       | GAC AGG GAC ACA CAG AGT CAC TAT TC | qChIP-PCR           | 150                  | 60             |
|             | Reverse       | TCA GGC ACC TGC CAA GTT G          |                     |                      |                |
| FOXO4       | Forward       | AGG GCG AGG GAC TGG ACT T          | qChIP-PCR           | 150                  | 60             |
|             | Reverse       | AGG AGC TCT GGC TAC CAC TTG T      |                     |                      |                |
| CASZ1       | Forward       | TGC GTT GGA GCT GAG GTC TA         | qChIP-PCR           | 153                  | 60             |
|             | Reverse       | CGG CGT TTA TAT TTT AGG GAA GAA    |                     |                      |                |
| IL21R       | Forward       | GGG CTG TGG TGA GGA ATG TG         | qChIP-PCR           | 126                  | 60             |
|             | Reverse       | GGT CTC TGT TCT TGG CCA TGA        |                     |                      |                |
| RAB37       | Forward       | GGG ACT GCC TGA CCT TGT TG         | qChIP-PCR           | 126                  | 60             |
|             | Reverse       | TGA GCA AAC GAT GCC AGC TA         |                     |                      |                |
| HTRA3       | Forward       | AAC CCC CAG ACC ACG TTG T          | qChIP-PCR           | 150                  | 60             |
|             | Reverse       | CAT CCT TCC CCA GGC AGT T          |                     |                      |                |
| SDC1        | Forward       | CCC AGC CCC AGA CTG TAT GT         | qChIP-PCR           | 150                  | 60             |
|             | Reverse       | AGC CAA TCC TAC GGT GCA TT         |                     |                      |                |
| VASH1       | Forward       | AGA GAG GAG GCT CAG CAA GGT        | qChIP-PCR           | 150                  | 60             |
|             | Reverse       | GCA TAG CAC CCC TAG AGG AAA G      |                     |                      |                |

| Gene                      | Primer    | Sequences (5'→ 3')             | Application*               | PCR size (bp)   | Tm (°C) |
|---------------------------|-----------|--------------------------------|----------------------------|-----------------|---------|
| PTEN-1 promoter           | Forward   | CGA CTG TGG CCC GTG TAT C      | qChIP-PCR                  | 100             | 60      |
|                           | Reverse   | AAA GTA CGG AAC GGT AGG AAG CT |                            |                 |         |
| PTEN-2 promoter           | Forward   | CTT TCC ACT CAA CCC GGT AA     | qChIP-PCR                  | 145             | 60      |
|                           | Reverse   | GGA GTC AAG CTC GGT TCT CA     |                            |                 |         |
| PTEN-1<br>Sp1 site mutant | Sense     | TAGGTCTCCTCAACCAACCCACTCGCTGGG | Site-direct<br>mutagenesis | -- <sup>†</sup> | 61      |
|                           | Antisense | CCCAGCGAGTGGGTTGGTTGAGGAGACCTA |                            |                 |         |
| PTEN-2<br>Sp1 site mutant | Sense     | AGGGGGGGTTGGGCTAGG             | Site-direct<br>mutagenesis | -- <sup>†</sup> | 61      |
|                           | Antisense | CCTAGCCCAACCCCCCT              |                            |                 |         |
| TNC<br>Sp1 site mutant    | Sense     | GTCGGGGGTTGGCAGGCGGGA          | Site-direct<br>mutagenesis | -- <sup>†</sup> | 61      |
|                           | Antisense | TCCCGCCTGCCAACCCCGAC           |                            |                 |         |
| TNC<br>Oct4 site mutant   | Sense     | GCCATAAATTGTCCCAAATGGGTTCC     | Site-direct<br>mutagenesis | -- <sup>†</sup> | 50      |
|                           | Antisense | GGAACCCATTTGGGGACAATTTATGGC    |                            |                 |         |

\* qRT-PCR, quantitative reverse-transcriptase polymer chain reaction; qChIP-PCR, quantitative chromatin-immunoprecipitation coupled with polymer chain reaction.

<sup>†</sup> --, Not applicable.

**Supplementary Table S5.** The DAPA probes used in the current study.

| Name     | Primer*            | Sequences (5'→ 3')                                       |
|----------|--------------------|----------------------------------------------------------|
| PTEN-1   | Sense              | TAGGTCTCCTCGCCCCGCCACTCGCTGGGCTGC                        |
| Sp1-WT   | Antisense (Biotin) | GCAGCCCAGCGAGTGGGCGGGGCGAGGAGACCTA                       |
| PTEN-1   | Sense              | TAGGTCTCCTCACACAACCCACTCGCTGGTCTGC                       |
| Sp1-Mut  | Antisense (Biotin) | GCAGACCAGCGAGTGGGTTGTGTGAGGAGACCTA                       |
| PTEN-2   | Sense (Biotin)     | CGGCCAAGGGGGGGCGGGGCTAGGTGGTCTCTGA                       |
| Sp1-WT   | Antisense          | TCAGAGACCACCTAGCCCCGCCCCCCTTGGCCG                        |
| PTEN-2   | Sense (Biotin)     | CGGCCAAGGGGGGGTGGGCTAGGTGGTCTCTGA                        |
| Sp1-Mut  | Antisense          | TCAGAGACCACCTAGCCCAACCCCCCCTTGGCCG                       |
| TNC      | Sense (Biotin)     | GTCGGGGGCGGGCAGGCGGGAATTCCTACTTTCGCCATAAATTGTATGCAAATGGG |
| Sp1-WT   | Antisense          | CCCATTTGCATACAATTTATGGCGAAAGTAGGAATTCCTGCCTGCCCGCCCCCGAC |
| TNC      | Sense (Biotin)     | GTCGGGGGTTGGCAGGCGGGAATTCCTACTTTCGCCATAAATTGTATGCAAATGGG |
| Sp1-Mut  | Antisense          | CCCATTTGCATACAATTTATGGCGAAAGTAGGAATTCCTGCCTGCCAACCCCCGAC |
| TNC      | Sense (Biotin)     | GTCGGGGGCGGGCAGGCGGGAATTCCTACTTTCGCCATAAATTGTATGCAAATGGG |
| Oct4-WT  | Antisense          | CCCATTTGCATACAATTTATGGCGAAAGTAGGAATTCCTGCCTGCCCGCCCCCGAC |
| TNC      | Sense (Biotin)     | GTCGGGGGCGGGCAGGCGGGAATTCCTACTTTCGCCATAAATTGTCCCAACTGGG  |
| Oct4-Mut | Antisense          | CCCAGTTGGGGACAATTTATGGCGAAAGTAGGAATTCCTGCCTGCCCGCCCCCGAC |

\* Biotin was labeled at 5' end of either sense or antisense probe.

**Supplementary Table S6.** Clinical characteristics of Oct4, PTEN, and TNC expression in lung cancer patients enrolled in this study.

| <b>Total patient number (N= 133)</b> |                                          |                                       |                      |
|--------------------------------------|------------------------------------------|---------------------------------------|----------------------|
| Characteristics*                     | Oct4 protein                             |                                       | P-value <sup>†</sup> |
|                                      | Normal expression<br>41 (30.8%)<br>N (%) | Overexpression<br>92 (69.2%)<br>N (%) |                      |
| <b>Age</b>                           |                                          |                                       |                      |
| <60                                  | 15 (39.5)                                | 23 (60.5)                             | 0.172                |
| ≥60                                  | 26 (27.4)                                | 69 (72.6)                             |                      |
| <b>Sex</b>                           |                                          |                                       |                      |
| Male                                 | 30 (32.3)                                | 63 (67.7)                             | 0.586                |
| Female                               | 11 (27.5)                                | 29 (72.5)                             |                      |
| <b>Smoke</b>                         |                                          |                                       |                      |
| Yes                                  | 21 (30.9)                                | 47 (69.1)                             | 0.540                |
| No                                   | 15 (36.6)                                | 26 (63.4)                             |                      |
| <b>Tumor type</b>                    |                                          |                                       |                      |
| ADC                                  | 34 (35.1)                                | 63 (64.9)                             | 0.193                |
| SCC                                  | 5 (22.7)                                 | 17 (77.3)                             |                      |
| Others                               | 2 (14.3)                                 | 12 (85.7)                             |                      |
| <b>Tumor stage</b>                   |                                          |                                       |                      |
| I & II                               | 30 (36.1)                                | 53 (63.9)                             | 0.087                |
| III & IV                             | 11 (22.0)                                | 39 (78.0)                             |                      |
| <b>T status</b>                      |                                          |                                       |                      |
| T1                                   | 12 (50.0)                                | 12 (50.0)                             | 0.006                |
| T2                                   | 19 (21.1)                                | 71 (78.9)                             |                      |
| T3                                   | 6 (54.5)                                 | 5 (45.5)                              |                      |
| T4                                   | 4 (50.0)                                 | 4 (50.0)                              |                      |
| <b>N status</b>                      |                                          |                                       |                      |
| N0                                   | 26 (40.0)                                | 39 (60.0)                             | 0.025                |
| N1-2                                 | 15 (22.1)                                | 53 (77.9)                             |                      |
| <b>M status</b>                      |                                          |                                       |                      |
| M0                                   | 39 (31.7)                                | 84 (68.3)                             | 0.441                |
| M1                                   | 2 (20.0)                                 | 8 (80.0)                              |                      |

| Characteristics*   | PTEN protein        |                     | P-value <sup>†</sup> |
|--------------------|---------------------|---------------------|----------------------|
|                    | Normal expression   | Low expression      |                      |
|                    | 52 (39.1%)<br>N (%) | 81 (60.9%)<br>N (%) |                      |
| <b>Age</b>         |                     |                     |                      |
| <60                | 21 (55.3)           | 17 (44.7)           | 0.016                |
| ≥60                | 31 (32.6)           | 64 (67.4)           |                      |
| <b>Sex</b>         |                     |                     |                      |
| Male               | 31 (33.3)           | 62 (66.7)           | 0.038                |
| Female             | 21 (52.5)           | 19 (47.5)           |                      |
| <b>Smoke</b>       |                     |                     |                      |
| Yes                | 22 (32.4)           | 46 (67.6)           | 0.028                |
| No                 | 22 (53.7)           | 19 (46.3)           |                      |
| <b>Tumor type</b>  |                     |                     |                      |
| ADC                | 44 (45.4)           | 53 (54.6)           | 0.052                |
| SCC                | 5 (22.7)            | 17 (77.3)           |                      |
| Others             | 3 (21.4)            | 11 (78.6)           |                      |
| <b>Tumor stage</b> |                     |                     |                      |
| I & II             | 34 (41.0)           | 49 (59.0)           | 0.570                |
| III & IV           | 18 (36.0)           | 32 (64.0)           |                      |
| <b>T status</b>    |                     |                     |                      |
| T1                 | 14 (58.3)           | 10 (41.7)           | 0.060                |
| T2                 | 29 (32.2)           | 61 (67.8)           |                      |
| T3                 | 4 (36.4)            | 7 (63.6)            |                      |
| T4                 | 5 (62.5)            | 3 (37.5)            |                      |
| <b>N status</b>    |                     |                     |                      |
| N0                 | 29 (44.6)           | 36 (55.4)           | 0.202                |
| N1-2               | 23 (33.8)           | 45 (66.2)           |                      |
| <b>M status</b>    |                     |                     |                      |
| M0                 | 47 (38.2)           | 76 (61.8)           | 0.463                |
| M1                 | 5 (50.0)            | 5 (50.0)            |                      |



| Characteristics*   | TNC protein         |                     | P-value <sup>†</sup> |
|--------------------|---------------------|---------------------|----------------------|
|                    | Normal expression   | Overexpression      |                      |
|                    | 55 (41.4%)<br>N (%) | 78 (58.6%)<br>N (%) |                      |
| <b>Age</b>         |                     |                     |                      |
| <60                | 17 (44.7)           | 21 (55.3)           | 0.616                |
| ≥60                | 38 (40.0)           | 57 (60.0)           |                      |
| <b>Sex</b>         |                     |                     |                      |
| Male               | 39 (41.9)           | 54 (58.6)           | 0.835                |
| Female             | 16 (40.0)           | 24 (60.0)           |                      |
| <b>Smoke</b>       |                     |                     |                      |
| Yes                | 27 (39.7)           | 41 (60.3)           | 0.746                |
| No                 | 15 (36.6)           | 26 (63.4)           |                      |
| <b>Tumor type</b>  |                     |                     |                      |
| ADC                | 37 (38.1)           | 60 (61.9)           | 0.178                |
| SCC                | 13 (59.1)           | 9 (40.9)            |                      |
| Others             | 5 (35.7)            | 9 (64.3)            |                      |
| <b>Tumor stage</b> |                     |                     |                      |
| I & II             | 39 (47.0)           | 44 (53.0)           | 0.089                |
| III & IV           | 16 (32.0)           | 34 (68.0)           |                      |
| <b>T status</b>    |                     |                     |                      |
| T1                 | 10 (41.7)           | 14 (58.3)           | 0.942                |
| T2                 | 36 (40.0)           | 54 (60.0)           |                      |
| T3                 | 5 (45.5)            | 6 (54.5)            |                      |
| T4                 | 4 (50.0)            | 4 (50.0)            |                      |
| <b>N status</b>    |                     |                     |                      |
| N0                 | 36 (55.4)           | 29 (44.6)           | 0.001                |
| N1-2               | 19 (27.9)           | 49 (72.1)           |                      |
| <b>M status</b>    |                     |                     |                      |
| M0                 | 53 (43.1)           | 70 (56.9)           | 0.154                |
| M1                 | 2 (20.0)            | 8 (80.0)            |                      |

\* ADC: adenocarcinoma, SCC: squamous cell carcinoma, T describes the size of the tumor, N describes regional lymph nodes, M describes distant metastasis.

<sup>†</sup> The P values were determined by the Pearson  $\chi^2$  test.

**Supplementary Table S7.** The 5,380 regions identified with high confidence in two independent experiments by ChIP-seq analysis taken from control and Oct4 expressing A549 cells.

| Chr no. | Region                | Length | FDR (%) | # Reads | # Forward reads | # Reverse reads | Normalized difference | Wilcoxon filter p-value | 5' gene      | 3' gene   | Common Oct4-target genes identified by Boyer <i>et al.</i> , 2005 |
|---------|-----------------------|--------|---------|---------|-----------------|-----------------|-----------------------|-------------------------|--------------|-----------|-------------------------------------------------------------------|
| chr1    | +(1453533..1454469)   | 936    | 0.06522 | 24      | 16              | 8               | 0.3333333             | 0.00072543              | ATAD3A       | C1orf70   |                                                                   |
| chr1    | +(1459561..1460086)   | 525    | 1.94055 | 9       | 3               | 6               | 0.3333333             | 0.048                   | ATAD3A       | C1orf70   |                                                                   |
| chr1    | +(1653685..1654210)   | 525    | 1.94055 | 13      | 6               | 7               | 0.0769231             | 0.00757922              | MMP23A_dup1  | CDK11B    |                                                                   |
| chr1    | +(1669471..1670152)   | 681    | 0.01616 | 25      | 12              | 13              | 0.04                  | 8.7329E-05              | CDK11A       | SLC35E2   |                                                                   |
| chr1    | +(1687507..1688207)   | 700    | 0.22348 | 10      | 6               | 4               | 0.2                   | 0.005                   | SLC35E2      | NADK      |                                                                   |
| chr1    | +(2114015..2114523)   | 508    | 0.94117 | 8       | 4               | 4               | 0                     | 0.014                   | PRKCZ        | C1orf86   |                                                                   |
| chr1    | +(2541920..2542620)   | 700    | 0.46268 | 9       | 6               | 3               | 0.3333333             | 0.012                   | C1orf93      | MMEL1     |                                                                   |
| chr1    | +(3239084..3239768)   | 684    | 0.46268 | 9       | 6               | 3               | 0.3333333             | 0.012                   | MIR4251      | ARHGEF16  |                                                                   |
| chr1    | +(3339077..3339777)   | 700    | 4.18167 | 9       | 6               | 3               | 0.3333333             | 0.988                   | MIR4251      | ARHGEF16  |                                                                   |
| chr1    | +(3454542..3455242)   | 700    | 0.22348 | 15      | 8               | 7               | 0.0666667             | 0.67828558              | ARHGEF16     | MEGF6     |                                                                   |
| chr1    | +(3742766..3743296)   | 530    | 0.94117 | 11      | 4               | 7               | 0.2727273             | 0.012                   | LRRC47       | KIAA0562  |                                                                   |
| chr1    | +(3820885..3821411)   | 526    | 1.94055 | 10      | 3               | 7               | 0.4                   | 0.008                   | LOC100133612 | LOC284661 |                                                                   |
| chr1    | +(4033143..4033973)   | 830    | 0.00319 | 18      | 8               | 10              | 0.1111111             | 0.00018964              | LOC100133612 | LOC284661 |                                                                   |
| chr1    | +(6259007..6259705)   | 698    | 0.22348 | 12      | 4               | 8               | 0.3333333             | 0.077                   | CHD5         | RPL22     |                                                                   |
| chr1    | +(6326405..6327090)   | 685    | 4.18167 | 6       | 3               | 3               | 0                     | 0.05                    | GPR153       | ACOT7     |                                                                   |
| chr1    | +(6501725..6502227)   | 502    | 1.94055 | 10      | 3               | 7               | 0.4                   | 0.008                   | MIR4252      | TNFRSF25  |                                                                   |
| chr1    | +(6505625..6506142)   | 517    | 4.18167 | 6       | 4               | 2               | 0.3333333             | 0.067                   | MIR4252      | TNFRSF25  |                                                                   |
| chr1    | +(6522533..6523099)   | 566    | 1.94055 | 10      | 4               | 6               | 0.2                   | 0.033                   | MIR4252      | TNFRSF25  |                                                                   |
| chr1    | +(6644507..6645047)   | 540    | 1.94055 | 7       | 3               | 4               | 0.1428571             | 0.029                   | ZBTB48       | KLHL21    |                                                                   |
| chr1    | +(7157981..7158523)   | 542    | 1.94055 | 7       | 3               | 4               | 0.1428571             | 0.029                   | CAMTA1       | VAMP3     |                                                                   |
| chr1    | +(7468051..7468751)   | 700    | 0.46268 | 9       | 3               | 6               | 0.3333333             | 0.012                   | CAMTA1       | VAMP3     |                                                                   |
| chr1    | +(9775605..9776118)   | 513    | 0.94117 | 9       | 4               | 5               | 0.1111111             | 0.143                   | C1orf200     | CLSTN1    |                                                                   |
| chr1    | +(10719411..10720031) | 620    | 1.94055 | 9       | 6               | 3               | 0.3333333             | 0.048                   | PEX14        | CASZ1     |                                                                   |
| chr1    | +(11316869..11317569) | 700    | 0.22348 | 10      | 6               | 4               | 0.2                   | 0.005                   | EXOSC10      | MTOR      |                                                                   |
| chr1    | +(11345573..11346161) | 588    | 1.94055 | 10      | 5               | 5               | 0                     | 0.0081468               | UBIAD1       | PTCHD2    |                                                                   |
| chr1    | +(11893536..11894038) | 502    | 4.18167 | 12      | 5               | 7               | 0.1666667             | 0.97882147              | CLCN6        | NPPA      |                                                                   |
| chr1    | +(12032658..12033251) | 593    | 1.94055 | 10      | 3               | 7               | 0.4                   | 0.992                   | PLOD1        | MFN2      |                                                                   |
| chr1    | +(12300817..12301512) | 695    | 4.18167 | 6       | 3               | 3               | 0                     | 0.05                    | VPS13D       | SNORA59A  |                                                                   |
| chr1    | +(12339459..12340056) | 597    | 0.94117 | 11      | 6               | 5               | 0.0909091             | 0.00308495              | VPS13D       | SNORA59A  |                                                                   |

|      |                       |      |         |    |    |    |           |            |               |               |
|------|-----------------------|------|---------|----|----|----|-----------|------------|---------------|---------------|
| chr1 | +(13670343..13670924) | 581  | 0.81155 | 22 | 11 | 11 | 0         | 0.04702034 | PRAMEF9_dup2  | PRAMEF14_dup2 |
| chr1 | +(13695656..13696162) | 506  | 2.6965  | 41 | 20 | 21 | 0.0243902 | 0.0028488  | PRAMEF14_dup2 | PRAMEF18_dup2 |
| chr1 | +(13746944..13747558) | 614  | 0.11833 | 20 | 14 | 6  | 0.4       | 0.1611498  | PRAMEF21_dup2 | LRRC38        |
| chr1 | +(14761075..14761775) | 700  | 0.22348 | 10 | 7  | 3  | 0.4       | 0.008      | PRDM2         | KAZ           |
| chr1 | +(15279089..15279654) | 565  | 1.94055 | 7  | 3  | 4  | 0.1428571 | 0.029      | KAZ           | C1orf126      |
| chr1 | +(16458376..16458907) | 531  | 4.18167 | 7  | 4  | 3  | 0.1428571 | 0.029      | FAM131C       | EPHA2         |
| chr1 | +(16484804..16485324) | 520  | 4.18167 | 6  | 4  | 2  | 0.3333333 | 0.067      | EPHA2         | ARHGEF19      |
| chr1 | +(16502040..16502665) | 625  | 0.46268 | 9  | 5  | 4  | 0.1111111 | 0.008      | EPHA2         | ARHGEF19      |
| chr1 | +(16735355..16735990) | 635  | 0.94117 | 11 | 5  | 6  | 0.0909091 | 0.70805879 | C1orf144      | SPATA21       |
| chr1 | +(16901107..16901632) | 525  | 1.58044 | 16 | 6  | 10 | 0.25      | 0.06444254 | MIR3675_dup1  | NBPF1         |
| chr1 | +(16906895..16908220) | 1325 | 0.00351 | 91 | 50 | 41 | 0.0989011 | 0.00310968 | MIR3675_dup1  | NBPF1         |
| chr1 | +(16911802..16912324) | 522  | 0.18837 | 36 | 19 | 17 | 0.0555556 | 0.00072478 | MIR3675_dup1  | NBPF1         |
| chr1 | +(16915323..16915913) | 590  | 0.3601  | 55 | 26 | 29 | 0.0545455 | 0.05463001 | MIR3675_dup1  | NBPF1         |
| chr1 | +(16918108..16918987) | 879  | 0.06522 | 25 | 12 | 13 | 0.04      | 0.00055009 | MIR3675_dup1  | NBPF1         |
| chr1 | +(17084049..17084569) | 520  | 4.18167 | 22 | 12 | 10 | 0.0909091 | 0.83868573 | ESPMP         | MST1P9        |
| chr1 | +(17087324..17087836) | 512  | 4.18167 | 11 | 4  | 7  | 0.2727273 | 0.324      | ESPMP         | MST1P9        |
| chr1 | +(17318530..17319087) | 557  | 0.94117 | 10 | 3  | 7  | 0.4       | 0.258      | MFAP2         | ATP13A2       |
| chr1 | +(17814027..17814641) | 614  | 1.94055 | 7  | 4  | 3  | 0.1428571 | 0.029      | RCC2          | ARHGEF10L     |
| chr1 | +(17993395..17994321) | 926  | 0.46268 | 15 | 6  | 9  | 0.2       | 0.00073136 | ARHGEF10L     | ACTL8         |
| chr1 | +(18010730..18011430) | 700  | 1.94055 | 12 | 6  | 6  | 0         | 0.97266803 | ARHGEF10L     | ACTL8         |
| chr1 | +(18020948..18021648) | 700  | 0.22348 | 10 | 6  | 4  | 0.2       | 0.005      | ARHGEF10L     | ACTL8         |
| chr1 | +(18700510..18701210) | 700  | 4.18167 | 10 | 4  | 6  | 0.2       | 0.995      | IGSF21        | KLHDC7A       |
| chr1 | +(18962570..18963087) | 517  | 4.18167 | 6  | 3  | 3  | 0         | 0.05       | PAX7          | TAS1R2        |
| chr1 | +(19950648..19951284) | 636  | 0.11833 | 11 | 4  | 7  | 0.2727273 | 0.003      | C1orf151      | NBL1          |
| chr1 | +(19980179..19980799) | 620  | 0.94117 | 8  | 5  | 3  | 0.25      | 0.018      | NBL1          | HTR6          |
| chr1 | +(20666303..20667003) | 700  | 0.46268 | 9  | 3  | 6  | 0.3333333 | 0.012      | VWA5B1        | LOC339505     |
| chr1 | +(20668322..20669022) | 700  | 4.18167 | 10 | 4  | 6  | 0.2       | 0.995      | VWA5B1        | LOC339505     |
| chr1 | +(21851347..21852047) | 700  | 0.46268 | 9  | 3  | 6  | 0.3333333 | 0.012      | ALPL          | RAP1GAP       |
| chr1 | +(22324302..22324836) | 534  | 4.18167 | 14 | 8  | 6  | 0.1428571 | 0.01943355 | CELA3B        | CELA3A        |
| chr1 | +(22336215..22336858) | 643  | 1.10834 | 45 | 15 | 30 | 0.3333333 | 0.00120778 | CELA3A        | HSPC157       |
| chr1 | +(22412736..22413277) | 541  | 0.46268 | 12 | 4  | 8  | 0.3333333 | 0.467      | CDC42         | WNT4          |
| chr1 | +(22450910..22452120) | 1210 | 4.18167 | 12 | 6  | 6  | 0         | 0.99802612 | CDC42         | WNT4          |
| chr1 | +(22504605..22505182) | 577  | 1.94055 | 7  | 4  | 3  | 0.1428571 | 0.029      | WNT4          | ZBTB40        |
| chr1 | +(22834654..22835233) | 579  | 1.94055 | 8  | 5  | 3  | 0.25      | 0.018      | ZBTB40        | EPHA8         |

|      |                       |      |         |    |    |    |           |            |           |          |
|------|-----------------------|------|---------|----|----|----|-----------|------------|-----------|----------|
| chr1 | +(22847891..22848406) | 515  | 4.18167 | 6  | 3  | 3  | 0         | 0.05       | ZBTB40    | EPHA8    |
| chr1 | +(23101584..23102087) | 503  | 4.18167 | 8  | 4  | 4  | 0         | 0.014      | EPHB2     | MIR4253  |
| chr1 | +(23710443..23710985) | 542  | 4.18167 | 6  | 3  | 3  | 0         | 0.05       | C1orf213  | TCEA3    |
| chr1 | +(24289414..24289979) | 565  | 4.18167 | 7  | 4  | 3  | 0.1428571 | 0.114      | PNRC2     | SRSF10   |
| chr1 | +(26079836..26080530) | 694  | 1.94055 | 10 | 7  | 3  | 0.4       | 0.992      | MAN1C1    | SEPN1    |
| chr1 | +(26523854..26524494) | 640  | 0.94117 | 8  | 5  | 3  | 0.25      | 0.018      | CATSPER4  | CCDC21   |
| chr1 | +(27237548..27238066) | 518  | 0.22348 | 13 | 4  | 9  | 0.3846154 | 0.003      | GPATCH3   | NR0B2    |
| chr1 | +(27268969..27269663) | 694  | 0.22348 | 10 | 7  | 3  | 0.4       | 0.008      | NUDC      | C1orf172 |
| chr1 | +(27277229..27277734) | 505  | 4.18167 | 6  | 2  | 4  | 0.3333333 | 0.067      | NUDC      | C1orf172 |
| chr1 | +(27464335..27465038) | 703  | 0.94117 | 13 | 8  | 5  | 0.2307692 | 0.0017074  | FAM46B    | SLC9A1   |
| chr1 | +(27815563..27816263) | 700  | 0.11833 | 11 | 7  | 4  | 0.2727273 | 0.003      | GPR3      | WASF2    |
| chr1 | +(27848979..27849677) | 698  | 1.94055 | 10 | 7  | 3  | 0.4       | 0.992      | WASF2     | AHDC1    |
| chr1 | +(27995270..27996050) | 780  | 0.01075 | 23 | 10 | 13 | 0.1304348 | 0.00078107 | FGR       | IFI6     |
| chr1 | +(28075510..28076076) | 566  | 4.18167 | 11 | 6  | 5  | 0.0909091 | 0.10062131 | FAM76A    | STX12    |
| chr1 | +(28450392..28451031) | 639  | 4.18167 | 6  | 2  | 4  | 0.3333333 | 0.067      | LOC653566 | PTAFR    |
| chr1 | +(28476831..28477345) | 514  | 0.94117 | 9  | 5  | 4  | 0.1111111 | 0.008      | LOC653566 | PTAFR    |
| chr1 | +(29161998..29162846) | 848  | 0.00097 | 21 | 12 | 9  | 0.1428571 | 6.2118E-05 | OPRD1     | EPB41    |
| chr1 | +(32047530..32048230) | 700  | 0.94117 | 13 | 5  | 8  | 0.2307692 | 0.9982926  | TINAGL1   | HCRTR1   |
| chr1 | +(32280224..32280761) | 537  | 1.94055 | 7  | 3  | 4  | 0.1428571 | 0.029      | MIR4254   | SPOCD1   |
| chr1 | +(32377084..32377661) | 577  | 0.46268 | 14 | 8  | 6  | 0.1428571 | 0.01006838 | SPOCD1    | PTP4A2   |
| chr1 | +(32496927..32497507) | 580  | 0.94117 | 9  | 4  | 5  | 0.1111111 | 0.008      | KHDRBS1   | TMEM39B  |
| chr1 | +(32689333..32689946) | 613  | 4.18167 | 11 | 5  | 6  | 0.0909091 | 0.03394459 | EIF3I     | MTMR9LP  |
| chr1 | +(33245456..33246127) | 671  | 4.18167 | 6  | 4  | 2  | 0.3333333 | 0.067      | KIAA1522  | YARS     |
| chr1 | +(33333780..33334480) | 700  | 1.94055 | 12 | 7  | 5  | 0.1666667 | 0.99775837 | S100BPB   | FNDC5    |
| chr1 | +(33489727..33490270) | 543  | 1.94055 | 10 | 4  | 6  | 0.2       | 0.019      | RNF19B    | AK2      |
| chr1 | +(34002239..34002770) | 531  | 4.18167 | 10 | 4  | 6  | 0.2       | 0.005      | ZSCAN20   | CSMD2    |
| chr1 | +(35369960..35370493) | 533  | 4.18167 | 7  | 3  | 4  | 0.1428571 | 0.029      | C1orf212  | DLGAP3   |
| chr1 | +(36831658..36832334) | 676  | 4.18167 | 6  | 4  | 2  | 0.3333333 | 0.067      | FAM176B   | STK40    |
| chr1 | +(40735426..40735941) | 515  | 4.18167 | 9  | 5  | 4  | 0.1111111 | 0.032      | ZMPSTE24  | COL9A2   |
| chr1 | +(41234614..41235918) | 1304 | 1.94055 | 16 | 9  | 7  | 0.125     | 0.00062229 | MIR30C1   | KCNQ4    |
| chr1 | +(42657237..42657761) | 524  | 4.18167 | 9  | 6  | 3  | 0.3333333 | 0.012      | GUCA2A    | FOXJ3    |
| chr1 | +(43317785..43318380) | 595  | 1.94055 | 10 | 4  | 6  | 0.2       | 0.238      | ZNF691    | SLC2A1   |
| chr1 | +(43352523..43353223) | 700  | 0.46268 | 13 | 9  | 4  | 0.3846154 | 0.926      | ZNF691    | SLC2A1   |
| chr1 | +(43365903..43366575) | 672  | 4.18167 | 6  | 4  | 2  | 0.3333333 | 0.067      | ZNF691    | SLC2A1   |

|      |                       |      |         |    |    |    |           |            |           |           |
|------|-----------------------|------|---------|----|----|----|-----------|------------|-----------|-----------|
| chr1 | +(43686908..43687441) | 533  | 1.94055 | 10 | 3  | 7  | 0.4       | 0.008      | WDR65     | TMEM125   |
| chr1 | +(43888706..43889406) | 700  | 0.11833 | 11 | 4  | 7  | 0.2727273 | 0.003      | C1orf84   | KIAA0467  |
| chr1 | +(43912802..43913620) | 818  | 1.94055 | 17 | 10 | 7  | 0.1764706 | 0.04855487 | KIAA0467  | HYI       |
| chr1 | +(43941234..43941770) | 536  | 0.46268 | 9  | 4  | 5  | 0.1111111 | 0.008      | HYI       | PTPRF     |
| chr1 | +(44068725..44069425) | 700  | 0.22348 | 14 | 9  | 5  | 0.2857143 | 0.96406968 | PTPRF     | KDM4A     |
| chr1 | +(44426722..44427250) | 528  | 1.94055 | 9  | 6  | 3  | 0.3333333 | 0.012      | IPO13     | DPH2      |
| chr1 | +(44429631..44430134) | 503  | 4.18167 | 8  | 3  | 5  | 0.25      | 0.071      | IPO13     | DPH2      |
| chr1 | +(44684996..44685658) | 662  | 0.94117 | 9  | 5  | 4  | 0.1111111 | 0.008      | DMAP1     | ERI3      |
| chr1 | +(45278032..45278732) | 700  | 0.11833 | 13 | 6  | 7  | 0.0769231 | 0.15865525 | BTBD19    | PTCH2     |
| chr1 | +(45485491..45485997) | 506  | 4.18167 | 6  | 2  | 4  | 0.3333333 | 0.067      | UROD      | ZSWIM5    |
| chr1 | +(45876848..45877544) | 696  | 4.18167 | 9  | 3  | 6  | 0.3333333 | 0.012      | TOE1      | TESK2     |
| chr1 | +(46527379..46528460) | 1081 | 0.06522 | 20 | 13 | 7  | 0.3       | 0.99885903 | MAST2     | PIK3R3    |
| chr1 | +(46662895..46663735) | 840  | 0.02727 | 20 | 6  | 14 | 0.4       | 0.000266   | TSPAN1    | POMGNT1   |
| chr1 | +(46745939..46746490) | 551  | 4.18167 | 8  | 5  | 3  | 0.25      | 0.286      | RAD54L    | LRRC41    |
| chr1 | +(46868672..46869185) | 513  | 4.18167 | 6  | 2  | 4  | 0.3333333 | 0.067      | FAAH      | DMBX1     |
| chr1 | +(46941628..46942328) | 700  | 0.46268 | 9  | 3  | 6  | 0.3333333 | 0.012      | FAAH      | DMBX1     |
| chr1 | +(47725860..47726380) | 520  | 1.94055 | 11 | 5  | 6  | 0.0909091 | 0.00881105 | TAL1      | STIL      |
| chr1 | +(48049695..48050383) | 688  | 4.18167 | 6  | 2  | 4  | 0.3333333 | 0.067      | FOXD2     | LOC388630 |
| chr1 | +(48276179..48276875) | 696  | 4.18167 | 6  | 2  | 4  | 0.3333333 | 0.067      | FOXD2     | LOC388630 |
| chr1 | +(51754135..51754714) | 579  | 4.18167 | 8  | 4  | 4  | 0         | 0.343      | RNF11     | TTC39A    |
| chr1 | +(51829337..51829875) | 538  | 4.18167 | 9  | 5  | 4  | 0.1111111 | 0.008      | TTC39A    | EPS15     |
| chr1 | +(52275968..52276485) | 517  | 1.94055 | 12 | 7  | 5  | 0.1666667 | 0.01417552 | OSBPL9    | NRD1      |
| chr1 | +(52746679..52747379) | 700  | 1.94055 | 10 | 3  | 7  | 0.4       | 0.992      | ZFYVE9    | CC2D1B    |
| chr1 | +(52902438..52902988) | 550  | 1.94055 | 11 | 7  | 4  | 0.2727273 | 0.794      | PRPF38A   | ZCCHC11   |
| chr1 | +(55249451..55250085) | 634  | 0.22348 | 10 | 4  | 6  | 0.2       | 0.005      | PARS2     | TTC22     |
| chr1 | +(58456258..58456843) | 585  | 4.18167 | 6  | 3  | 3  | 0         | 0.05       | C8B       | DAB1      |
| chr1 | +(59666329..59666843) | 514  | 4.18167 | 6  | 4  | 2  | 0.3333333 | 0.067      | LOC729467 | FGGY      |
| chr1 | +(59849337..59850477) | 1140 | 1.94055 | 13 | 6  | 7  | 0.0769231 | 0.0013499  | FGGY      | HOOK1     |
| chr1 | +(62340456..62341519) | 1063 | 0.46268 | 17 | 8  | 9  | 0.0588235 | 0.99647318 | INADL     | L1TD1     |
| chr1 | +(62738693..62739307) | 614  | 0.46268 | 9  | 3  | 6  | 0.3333333 | 0.012      | L1TD1     | KANK4     |
| chr1 | +(63005103..63005703) | 600  | 1.94055 | 9  | 4  | 5  | 0.1111111 | 0.008      | USP1      | DOCK7     |
| chr1 | +(63070140..63070706) | 566  | 0.46268 | 9  | 3  | 6  | 0.3333333 | 0.012      | USP1      | DOCK7     |
| chr1 | +(65831565..65832086) | 521  | 4.18167 | 10 | 5  | 5  | 0         | 0.45840747 | DNAJC6    | LEPROT    |
| chr1 | +(65857967..65858486) | 519  | 4.18167 | 9  | 4  | 5  | 0.1111111 | 0.857      | DNAJC6    | LEPROT    |

|      |                         |     |         |    |    |    |           |            |           |          |
|------|-------------------------|-----|---------|----|----|----|-----------|------------|-----------|----------|
| chr1 | +(65897330..65897833)   | 503 | 4.18167 | 6  | 4  | 2  | 0.3333333 | 0.067      | LEPR      | PDE4B    |
| chr1 | +(66826969..66827641)   | 672 | 0.02727 | 14 | 6  | 8  | 0.1428571 | 0.00097289 | PDE4B     | SGIP1    |
| chr1 | +(67105205..67105743)   | 538 | 1.94055 | 11 | 5  | 6  | 0.0909091 | 0.00881105 | MIR3117   | TCTEX1D1 |
| chr1 | +(67147640..67148476)   | 836 | 0.22348 | 16 | 9  | 7  | 0.125     | 0.00062229 | MIR3117   | TCTEX1D1 |
| chr1 | +(67154707..67155274)   | 567 | 1.94055 | 12 | 5  | 7  | 0.1666667 | 0.28488218 | MIR3117   | TCTEX1D1 |
| chr1 | +(67840050..67840585)   | 535 | 4.18167 | 6  | 3  | 3  | 0         | 0.05       | IL12RB2   | SERBP1   |
| chr1 | +(68948132..68948634)   | 502 | 4.18167 | 6  | 3  | 3  | 0         | 0.05       | RPE65     | DEPDC1   |
| chr1 | +(70624910..70625426)   | 516 | 1.94055 | 9  | 5  | 4  | 0.1111111 | 0.008      | PIN1P1    | LRRC40   |
| chr1 | +(74507005..74507514)   | 509 | 4.18167 | 15 | 5  | 10 | 0.3333333 | 0.54873837 | NEGR1     | LRRIQ3   |
| chr1 | +(75065177..75065731)   | 554 | 4.18167 | 9  | 4  | 5  | 0.1111111 | 0.095      | TNNI3K    | C1orf173 |
| chr1 | +(75072003..75072653)   | 650 | 0.06522 | 21 | 9  | 12 | 0.1428571 | 0.11349721 | TNNI3K    | C1orf173 |
| chr1 | +(76198167..76198775)   | 608 | 0.94117 | 11 | 5  | 6  | 0.0909091 | 0.29194121 | ACADM     | RABGGTB  |
| chr1 | +(78007463..78008163)   | 700 | 0.06522 | 12 | 7  | 5  | 0.1666667 | 0.00224163 | AK5       | ZZZ3     |
| chr1 | +(79126048..79126551)   | 503 | 4.18167 | 7  | 4  | 3  | 0.1428571 | 0.029      | IFI44     | ELTD1    |
| chr1 | +(84640332..84640964)   | 632 | 4.18167 | 9  | 3  | 6  | 0.3333333 | 0.048      | PRKACB    | SAMD13   |
| chr1 | +(86157104..86157804)   | 700 | 0.94117 | 12 | 4  | 8  | 0.3333333 | 0.024      | CYR61     | ZNHIT6   |
| chr1 | +(86591103..86591647)   | 544 | 4.18167 | 10 | 5  | 5  | 0         | 0.08726268 | ZNHIT6    | COL24A1  |
| chr1 | +(89338546..89339246)   | 700 | 1.94055 | 10 | 3  | 7  | 0.4       | 0.992      | PKN2      | GTF2B    |
| chr1 | +(90179806..90180333)   | 527 | 1.94055 | 7  | 3  | 4  | 0.1428571 | 0.029      | LRRC8C    | LRRC8D   |
| chr1 | +(90287471..90288171)   | 700 | 0.11833 | 11 | 5  | 6  | 0.0909091 | 0.00308495 | LRRC8D    | GEMIN8P4 |
| chr1 | +(91404709..91405228)   | 519 | 4.18167 | 10 | 6  | 4  | 0.2       | 0.543      | BARHL2    | ZNF644   |
| chr1 | +(91795384..91795929)   | 545 | 1.94055 | 8  | 5  | 3  | 0.25      | 0.071      | ZNF644    | HFM1     |
| chr1 | +(92763283..92763787)   | 504 | 4.18167 | 11 | 7  | 4  | 0.2727273 | 0.055      | C1orf146  | GLMN     |
| chr1 | +(93312592..93313141)   | 549 | 4.18167 | 7  | 3  | 4  | 0.1428571 | 0.029      | SNORA66   | FAM69A   |
| chr1 | +(94943652..94944283)   | 631 | 4.18167 | 10 | 4  | 6  | 0.2       | 0.086      | ABCD3     | F3       |
| chr1 | +(95367076..95367590)   | 514 | 4.18167 | 8  | 4  | 4  | 0         | 0.014      | SLC44A3   | CNN3     |
| chr1 | +(95711888..95712410)   | 522 | 1.94055 | 9  | 5  | 4  | 0.1111111 | 0.056      | RWDD3     | FLJ31662 |
| chr1 | +(98293430..98293964)   | 534 | 4.18167 | 6  | 3  | 3  | 0         | 0.05       | PTBP2     | DPYD     |
| chr1 | +(101704989..101705680) | 691 | 1.94055 | 13 | 9  | 4  | 0.3846154 | 0.001      | S1PR1     | OLFM3    |
| chr1 | +(101706636..101707311) | 675 | 4.18167 | 11 | 4  | 7  | 0.2727273 | 0.115      | S1PR1     | OLFM3    |
| chr1 | +(103386871..103387392) | 521 | 1.94055 | 8  | 3  | 5  | 0.25      | 0.018      | HEJ1      | COL11A1  |
| chr1 | +(104117585..104118087) | 502 | 0.46268 | 17 | 8  | 9  | 0.0588235 | 0.80676188 | LOC648740 | AMY2A    |
| chr1 | +(108993384..108993885) | 501 | 4.18167 | 13 | 6  | 7  | 0.0769231 | 0.01606229 | NBPF6     | FAM102B  |
| chr1 | +(108997996..108998712) | 716 | 1.58044 | 47 | 19 | 28 | 0.1914894 | 0.00295193 | NBPF6     | FAM102B  |

|      |                         |      |         |    |    |    |           |            |               |                |
|------|-------------------------|------|---------|----|----|----|-----------|------------|---------------|----------------|
| chr1 | +(109000426..109001054) | 628  | 1.97271 | 31 | 21 | 10 | 0.3548387 | 0.00712404 | NBPF6         | FAM102B        |
| chr1 | +(109242396..109242930) | 534  | 4.18167 | 10 | 6  | 4  | 0.2       | 0.019      | PRPF38B       | FNDC7          |
| chr1 | +(110200386..110200916) | 530  | 1.94055 | 14 | 7  | 7  | 0         | 0.2031169  | GSTM4         | GSTM2          |
| chr1 | +(110201167..110201712) | 545  | 0.94117 | 16 | 7  | 9  | 0.125     | 0.01500531 | GSTM4         | GSTM2          |
| chr1 | +(110231728..110232266) | 538  | 1.94055 | 10 | 7  | 3  | 0.4       | 0.033      | GSTM1         | GSTM5          |
| chr1 | +(110255366..110255929) | 563  | 4.18167 | 10 | 4  | 6  | 0.2       | 0.762      | GSTM5         | GSTM3          |
| chr1 | +(112345119..112345819) | 700  | 1.94055 | 10 | 3  | 7  | 0.4       | 0.992      | DDX20         | KCND3          |
| chr1 | +(115005657..115006304) | 647  | 0.94117 | 14 | 5  | 9  | 0.2857143 | 0.15865525 | SYT6          | TRIM33         |
| chr1 | +(115110546..115111100) | 554  | 1.94055 | 10 | 5  | 5  | 0         | 0.0081468  | TRIM33        | BCAS2          |
| chr1 | +(115342543..115343682) | 1139 | 0.46268 | 17 | 8  | 9  | 0.0588235 | 0.999734   | SIKE1         | SYCP1          |
| chr1 | +(115455524..115456040) | 516  | 1.94055 | 12 | 5  | 7  | 0.1666667 | 0.00591469 | SYCP1         | TSHB           |
| chr1 | +(117297203..117297803) | 600  | 4.18167 | 8  | 3  | 5  | 0.25      | 0.036      | CD2           | PTGFRN         |
| chr1 | +(117663162..117663807) | 645  | 1.94055 | 8  | 3  | 5  | 0.25      | 0.018      | MIR942        | TRIM45         |
| chr1 | +(117991867..117992948) | 1081 | 1.94055 | 14 | 7  | 7  | 0         | 0.99912744 | MAN1A2        | FAM46C         |
| chr1 | +(118558438..118559064) | 626  | 0.94117 | 11 | 7  | 4  | 0.2727273 | 0.021      | WDR3          | SPAG17         |
| chr1 | +(144094172..144094700) | 528  | 2.08944 | 35 | 18 | 17 | 0.0285714 | 0.00020658 | SRGAP2P2      | LOC728855_dup1 |
| chr1 | +(144224007..144224512) | 505  | 4.18167 | 9  | 6  | 3  | 0.3333333 | 0.452      | SRGAP2P2      | LOC728855_dup1 |
| chr1 | +(144814477..144815056) | 579  | 0.02727 | 23 | 14 | 9  | 0.2173913 | 0.00587169 | LOC653513     | PDE4DIP        |
| chr1 | +(144917654..144918190) | 536  | 0.46268 | 9  | 5  | 4  | 0.1111111 | 0.008      | LOC653513     | PDE4DIP        |
| chr1 | +(144954893..144955577) | 684  | 0.46268 | 13 | 6  | 7  | 0.0769231 | 0.00213737 | LOC653513     | PDE4DIP        |
| chr1 | +(145296307..145296845) | 538  | 1.49578 | 27 | 12 | 15 | 0.1111111 | 0.00420773 | NBPF10        | HFE2           |
| chr1 | +(145336755..145337273) | 518  | 1.94055 | 13 | 9  | 4  | 0.3846154 | 0.025      | NBPF10        | HFE2           |
| chr1 | +(145366504..145367059) | 555  | 1.94055 | 11 | 4  | 7  | 0.2727273 | 0.006      | NBPF10        | HFE2           |
| chr1 | +(145538576..145539189) | 613  | 4.18167 | 6  | 4  | 2  | 0.3333333 | 0.067      | ITGA10        | ANKRD35        |
| chr1 | +(147468429..147468997) | 568  | 1.94055 | 12 | 5  | 7  | 0.1666667 | 0.71511782 | GPR89C_dup2   | PDZK1P1_dup2   |
| chr1 | +(147475698..147476244) | 546  | 1.94055 | 11 | 4  | 7  | 0.2727273 | 0.264      | GPR89C_dup2   | PDZK1P1_dup2   |
| chr1 | +(148751597..148752138) | 541  | 4.13675 | 23 | 14 | 9  | 0.2173913 | 0.00988246 | NBPF16_dup2   | PPIAL4D_dup2   |
| chr1 | +(148805700..148806208) | 508  | 3.62933 | 29 | 10 | 19 | 0.3103448 | 0.00065948 | NBPF16_dup2   | PPIAL4D_dup2   |
| chr1 | +(149857700..149858258) | 558  | 4.18167 | 12 | 7  | 5  | 0.1666667 | 0.14557611 | HIST2H4B_dup2 | HIST2H2BE      |
| chr1 | +(150471741..150472262) | 521  | 4.18167 | 6  | 2  | 4  | 0.3333333 | 0.067      | TARS2         | ECM1           |
| chr1 | +(150477966..150478613) | 647  | 1.94055 | 7  | 4  | 3  | 0.1428571 | 0.029      | TARS2         | ECM1           |
| chr1 | +(150774126..150774826) | 700  | 0.46268 | 10 | 3  | 7  | 0.4       | 0.258      | CTSS          | CTSK           |
| chr1 | +(150825012..150825530) | 518  | 4.18167 | 9  | 3  | 6  | 0.3333333 | 0.048      | CTSK          | ARNT           |
| chr1 | +(150955534..150956231) | 697  | 0.94117 | 13 | 8  | 5  | 0.2307692 | 0.01405402 | ANXA9         | FAM63A         |

|      |                         |      |         |     |    |    |           |            |         |         |
|------|-------------------------|------|---------|-----|----|----|-----------|------------|---------|---------|
| chr1 | +(151400499..151401045) | 546  | 1.94055 | 15  | 7  | 8  | 0.0666667 | 0.12357999 | PSMB4   | POGZ    |
| chr1 | +(151546978..151547525) | 547  | 4.18167 | 10  | 7  | 3  | 0.4       | 0.333      | MIR554  | SNX27   |
| chr1 | +(152082713..152083261) | 548  | 0.81155 | 16  | 11 | 5  | 0.375     | 0.00540184 | TCHHL1  | TCHH    |
| chr1 | +(152127649..152128202) | 553  | 1.06787 | 44  | 21 | 23 | 0.0454545 | 0.01989223 | TCHH    | RPTN    |
| chr1 | +(152128216..152128806) | 590  | 1.06787 | 48  | 24 | 24 | 0         | 0.12838031 | TCHH    | RPTN    |
| chr1 | +(152193377..152194222) | 845  | 0.22348 | 21  | 14 | 7  | 0.3333333 | 0.18532499 | RPTN    | HRNR    |
| chr1 | +(152277393..152278102) | 709  | 0.06522 | 18  | 10 | 8  | 0.1111111 | 0.04568697 | HRNR    | FLG     |
| chr1 | +(152278570..152280037) | 1467 | 0.03638 | 123 | 68 | 55 | 0.1056911 | 0.83938281 | HRNR    | FLG     |
| chr1 | +(152280806..152281506) | 700  | 0.00653 | 51  | 34 | 17 | 0.3333333 | 0.01625815 | HRNR    | FLG     |
| chr1 | +(152282651..152283178) | 527  | 0.60327 | 21  | 10 | 11 | 0.047619  | 0.00458753 | HRNR    | FLG     |
| chr1 | +(152284812..152285336) | 524  | 0.22348 | 15  | 10 | 5  | 0.3333333 | 0.13517207 | HRNR    | FLG     |
| chr1 | +(152323315..152323818) | 503  | 4.18167 | 14  | 6  | 8  | 0.1428571 | 0.25930251 | FLG     | FLG2    |
| chr1 | +(152326198..152326827) | 629  | 0.22348 | 15  | 7  | 8  | 0.0666667 | 0.04128965 | FLG     | FLG2    |
| chr1 | +(152327793..152328644) | 851  | 0.46268 | 33  | 18 | 15 | 0.0909091 | 0.25759059 | FLG     | FLG2    |
| chr1 | +(152328767..152329317) | 550  | 4.18167 | 17  | 6  | 11 | 0.2941176 | 0.3815123  | FLG     | FLG2    |
| chr1 | +(152883160..152883704) | 544  | 4.18167 | 7   | 4  | 3  | 0.1428571 | 0.057      | IVL     | SPRR4   |
| chr1 | +(153065837..153066431) | 594  | 4.18167 | 10  | 4  | 6  | 0.2       | 0.086      | SPRR2B  | SPRR2E  |
| chr1 | +(153538135..153538835) | 700  | 1.94055 | 10  | 3  | 7  | 0.4       | 0.992      | S100A3  | S100A2  |
| chr1 | +(153570085..153570712) | 627  | 4.18167 | 6   | 4  | 2  | 0.3333333 | 0.067      | S100A2  | S100A16 |
| chr1 | +(153580459..153581006) | 547  | 4.18167 | 12  | 6  | 6  | 0         | 0.16833419 | S100A2  | S100A16 |
| chr1 | +(153719538..153720057) | 519  | 0.94117 | 13  | 9  | 4  | 0.3846154 | 0.099      | INTS3   | SLC27A3 |
| chr1 | +(153912744..153913273) | 529  | 0.22348 | 13  | 9  | 4  | 0.3846154 | 0.006      | GATAD2B | DENND4B |
| chr1 | +(153916552..153917117) | 565  | 0.46268 | 9   | 5  | 4  | 0.1111111 | 0.008      | GATAD2B | DENND4B |
| chr1 | +(154312803..154313320) | 517  | 1.94055 | 11  | 7  | 4  | 0.2727273 | 0.324      | ATP8B2  | IL6R    |
| chr1 | +(154315323..154316132) | 809  | 1.94055 | 15  | 7  | 8  | 0.0666667 | 0.14881073 | ATP8B2  | IL6R    |
| chr1 | +(154437306..154437812) | 506  | 4.18167 | 10  | 4  | 6  | 0.2       | 0.457      | IL6R    | SHE     |
| chr1 | +(154814282..154814982) | 700  | 0.22348 | 11  | 5  | 6  | 0.0909091 | 0.05017413 | ADAR    | KCNN3   |
| chr1 | +(154842060..154842572) | 512  | 4.18167 | 10  | 6  | 4  | 0.2       | 0.129      | ADAR    | KCNN3   |
| chr1 | +(154881613..154882313) | 700  | 0.11833 | 11  | 6  | 5  | 0.0909091 | 0.00308495 | KCNN3   | PMVK    |
| chr1 | +(155011702..155012402) | 700  | 1.94055 | 11  | 6  | 5  | 0.0909091 | 0.94982587 | DCST1   | ADAM15  |
| chr1 | +(155018372..155018898) | 526  | 4.18167 | 6   | 3  | 3  | 0         | 0.05       | DCST1   | ADAM15  |
| chr1 | +(155186693..155187351) | 658  | 4.18167 | 9   | 4  | 5  | 0.1111111 | 0.095      | MTX1    | GBAP1   |
| chr1 | +(155257952..155258549) | 597  | 4.18167 | 10  | 4  | 6  | 0.2       | 0.305      | HCN3    | PKLR    |
| chr1 | +(155307923..155308577) | 654  | 1.94055 | 8   | 3  | 5  | 0.25      | 0.018      | RUSC1   | ASH1L   |



|      |                         |     |         |    |    |    |           |            |          |          |
|------|-------------------------|-----|---------|----|----|----|-----------|------------|----------|----------|
| chr1 | +(155448563..155449146) | 583 | 4.18167 | 10 | 6  | 4  | 0.2       | 0.033      | RUSC1    | ASH1L    |
| chr1 | +(155629711..155630605) | 894 | 4.18167 | 19 | 10 | 9  | 0.0526316 | 0.46746266 | MSTO1    | YY1AP1   |
| chr1 | +(155717113..155717651) | 538 | 0.94117 | 27 | 14 | 13 | 0.037037  | 0.5        | MSTO2P   | GON4L    |
| chr1 | +(155718904..155719437) | 533 | 0.11833 | 23 | 11 | 12 | 0.0434783 | 0.45101732 | MSTO2P   | GON4L    |
| chr1 | +(155720256..155720844) | 588 | 0.02727 | 20 | 13 | 7  | 0.3       | 0.01465918 | MSTO2P   | GON4L    |
| chr1 | +(155735853..155736541) | 688 | 0.04473 | 24 | 12 | 12 | 0         | 0.00395589 | MSTO2P   | GON4L    |
| chr1 | +(155896637..155897155) | 518 | 4.18167 | 6  | 4  | 2  | 0.3333333 | 0.067      | RIT1     | KIAA0907 |
| chr1 | +(156146410..156147088) | 678 | 1.94055 | 13 | 6  | 7  | 0.0769231 | 0.0992714  | SEMA4A   | SLC25A44 |
| chr1 | +(156169492..156170192) | 700 | 0.94117 | 11 | 4  | 7  | 0.2727273 | 0.464      | SLC25A44 | PMF1     |
| chr1 | +(156221060..156221610) | 550 | 4.18167 | 6  | 4  | 2  | 0.3333333 | 0.067      | PAQR6    | SMG5     |
| chr1 | +(156347871..156348387) | 516 | 4.18167 | 8  | 4  | 4  | 0         | 0.014      | RHBG     | C1orf61  |
| chr1 | +(156556482..156557179) | 697 | 0.94117 | 9  | 6  | 3  | 0.3333333 | 0.274      | TTC24    | APOA1BP  |
| chr1 | +(156562052..156562559) | 507 | 1.94055 | 10 | 6  | 4  | 0.2       | 0.033      | APOA1BP  | GPATCH4  |
| chr1 | +(156701932..156702469) | 537 | 4.18167 | 6  | 3  | 3  | 0         | 0.05       | C1orf66  | MRPL24   |
| chr1 | +(156811437..156812047) | 610 | 0.06522 | 15 | 9  | 6  | 0.2       | 0.00160811 | NTRK1    | INSRR    |
| chr1 | +(156844118..156844700) | 582 | 0.94117 | 12 | 7  | 5  | 0.1666667 | 0.00926649 | INSRR    | PEAR1    |
| chr1 | +(158587660..158588245) | 585 | 1.94055 | 10 | 6  | 4  | 0.2       | 0.005      | OR10Z1   | SPTA1    |
| chr1 | +(159894746..159895377) | 631 | 4.18167 | 6  | 3  | 3  | 0         | 0.05       | CCDC19   | TAGLN2   |
| chr1 | +(160011315..160011914) | 599 | 0.94117 | 15 | 7  | 8  | 0.0666667 | 0.01862128 | PIGM     | KCNJ10   |
| chr1 | +(160133896..160134400) | 504 | 4.18167 | 10 | 4  | 6  | 0.2       | 0.005      | ATP1A4   | CASQ1    |
| chr1 | +(160325642..160326420) | 778 | 4.18167 | 13 | 9  | 4  | 0.3846154 | 0.053      | NCSTN    | NHLH1    |
| chr1 | +(160380049..160380749) | 700 | 0.46268 | 9  | 6  | 3  | 0.3333333 | 0.012      | VANGL2   | SLAMF6   |
| chr1 | +(161026001..161026659) | 658 | 0.94117 | 8  | 4  | 4  | 0         | 0.014      | USF1     | ARHGAP30 |
| chr1 | +(161167318..161167839) | 521 | 1.94055 | 12 | 5  | 7  | 0.1666667 | 0.34237168 | B4GALT3  | ADAMTS4  |
| chr1 | +(161228762..161229409) | 647 | 4.18167 | 6  | 4  | 2  | 0.3333333 | 0.067      | PCP4L1   | MPZ      |
| chr1 | +(161599237..161599771) | 534 | 4.18167 | 9  | 3  | 6  | 0.3333333 | 0.048      | HSPA7    | FCGR3B   |
| chr1 | +(161632898..161633423) | 525 | 1.94055 | 12 | 6  | 6  | 0         | 0.1000924  | FCGR3B   | FCGR2B   |
| chr1 | +(161641003..161641519) | 516 | 0.46268 | 25 | 16 | 9  | 0.28      | 0.05031556 | FCGR2B   | RPL31P11 |
| chr1 | +(161642573..161643130) | 557 | 0.22348 | 13 | 9  | 4  | 0.3846154 | 0.006      | FCGR2B   | RPL31P11 |
| chr1 | +(161829789..161830290) | 501 | 4.18167 | 9  | 3  | 6  | 0.3333333 | 0.012      | ATF6     | OLFML2B  |
| chr1 | +(162326494..162327194) | 700 | 0.22348 | 10 | 5  | 5  | 0         | 0.00451172 | MIR556   | C1orf111 |
| chr1 | +(162343736..162344413) | 677 | 0.94117 | 14 | 8  | 6  | 0.1428571 | 0.39812671 | MIR556   | C1orf111 |
| chr1 | +(162482239..162482807) | 568 | 4.18167 | 11 | 4  | 7  | 0.2727273 | 0.082      | UHMK1    | UAP1     |
| chr1 | +(162567159..162567798) | 639 | 0.22348 | 10 | 5  | 5  | 0         | 0.00451172 | UAP1     | DDR2     |

|      |                         |      |         |    |    |    |           |            |          |              |
|------|-------------------------|------|---------|----|----|----|-----------|------------|----------|--------------|
| chr1 | +(162740140..162740645) | 505  | 4.18167 | 11 | 7  | 4  | 0.2727273 | 0.206      | DDR2     | HSD17B7      |
| chr1 | +(162825345..162825906) | 561  | 4.18167 | 9  | 6  | 3  | 0.3333333 | 0.19       | HSD17B7  | C1orf110     |
| chr1 | +(164618962..164619665) | 703  | 0.01616 | 16 | 7  | 9  | 0.125     | 0.00042755 | PBX1     | LMX1A        |
| chr1 | +(165876761..165877286) | 525  | 4.18167 | 6  | 4  | 2  | 0.3333333 | 0.067      | UCK2     | MIR3658      |
| chr1 | +(167023722..167025496) | 1774 | 1.94055 | 26 | 13 | 13 | 0         | 0.22856236 | MAEL     | GPA33        |
| chr1 | +(167617480..167618851) | 1371 | 1.94055 | 13 | 6  | 7  | 0.0769231 | 0.0013499  | RCSL1    | MPZL1        |
| chr1 | +(167672247..167672875) | 628  | 0.22348 | 10 | 4  | 6  | 0.2       | 0.005      | RCSL1    | MPZL1        |
| chr1 | +(167742321..167743380) | 1059 | 4.18167 | 13 | 6  | 7  | 0.0769231 | 0.0013499  | MPZL1    | ADCY10       |
| chr1 | +(167764348..167765003) | 655  | 0.46268 | 9  | 4  | 5  | 0.1111111 | 0.008      | MPZL1    | ADCY10       |
| chr1 | +(168013750..168014350) | 600  | 1.94055 | 8  | 3  | 5  | 0.25      | 0.018      | DCAF6    | GPR161       |
| chr1 | +(169510225..169510733) | 508  | 4.22001 | 34 | 19 | 15 | 0.1176471 | 0.05726672 | SLC19A2  | F5           |
| chr1 | +(169679431..169679935) | 504  | 4.18167 | 9  | 5  | 4  | 0.1111111 | 0.008      | SELP     | SELL         |
| chr1 | +(169761537..169762076) | 539  | 4.18167 | 8  | 3  | 5  | 0.25      | 0.196      | SELE     | C1orf156     |
| chr1 | +(169798279..169798788) | 509  | 4.18167 | 6  | 2  | 4  | 0.3333333 | 0.067      | C1orf112 | SCYL3        |
| chr1 | +(171250991..171251567) | 576  | 4.18167 | 9  | 3  | 6  | 0.3333333 | 0.19       | FMO1     | FMO4         |
| chr1 | +(171486564..171487086) | 522  | 4.18167 | 7  | 4  | 3  | 0.1428571 | 0.029      | BAT2L2   | MYOC         |
| chr1 | +(171501519..171502157) | 638  | 0.22348 | 15 | 7  | 8  | 0.0666667 | 0.01394527 | BAT2L2   | MYOC         |
| chr1 | +(171560486..171561015) | 529  | 4.18167 | 8  | 4  | 4  | 0         | 0.343      | BAT2L2   | MYOC         |
| chr1 | +(171569897..171570468) | 571  | 0.94117 | 8  | 4  | 4  | 0         | 0.014      | BAT2L2   | MYOC         |
| chr1 | +(171953309..171953885) | 576  | 4.18167 | 6  | 3  | 3  | 0         | 0.05       | DNM3     | MIR214       |
| chr1 | +(172526651..172527302) | 651  | 1.94055 | 12 | 7  | 5  | 0.1666667 | 0.53235847 | C1orf9   | FASLG        |
| chr1 | +(173628316..173628916) | 600  | 4.18167 | 11 | 6  | 5  | 0.0909091 | 0.00308495 | SLC9A11  | ANKRD45      |
| chr1 | +(173714093..173714631) | 538  | 4.18167 | 6  | 4  | 2  | 0.3333333 | 0.067      | KLHL20   | CENPL        |
| chr1 | +(173799393..173800090) | 697  | 0.46268 | 16 | 11 | 5  | 0.375     | 0.05022464 | DARS2    | LOC100506046 |
| chr1 | +(175691011..175691663) | 652  | 4.18167 | 9  | 6  | 3  | 0.3333333 | 0.012      | KIAA0040 | TNR          |
| chr1 | +(176873360..176873967) | 607  | 0.94117 | 8  | 4  | 4  | 0         | 0.014      | PAPPA2   | ASTN1        |
| chr1 | +(177015248..177015948) | 700  | 0.22348 | 10 | 3  | 7  | 0.4       | 0.008      | PAPPA2   | ASTN1        |
| chr1 | +(178716253..178716757) | 504  | 0.94117 | 12 | 4  | 8  | 0.3333333 | 0.055      | RALGPS2  | ANGPTL1      |
| chr1 | +(179054732..179055238) | 506  | 4.18167 | 11 | 5  | 6  | 0.0909091 | 0.10062131 | TOR3A    | ABL2         |
| chr1 | +(180065348..180065950) | 602  | 1.94055 | 11 | 4  | 7  | 0.2727273 | 0.158      | CEP350   | QSOX1        |
| chr1 | +(180202907..180203415) | 508  | 0.94117 | 8  | 4  | 4  | 0         | 0.014      | LHX4     | ACBD6        |
| chr1 | +(181700030..181700730) | 700  | 4.18167 | 8  | 3  | 5  | 0.25      | 0.018      | CACNA1E  | ZNF648       |
| chr1 | +(186905638..186906992) | 1354 | 1.94055 | 14 | 7  | 7  | 0         | 0.99912744 | PLA2G4A  | FAM5C        |
| chr1 | +(193116760..193117314) | 554  | 4.18167 | 8  | 3  | 5  | 0.25      | 0.036      | MIR1278  | B3GALT2      |

|      |                         |      |         |    |    |    |           |            |          |           |
|------|-------------------------|------|---------|----|----|----|-----------|------------|----------|-----------|
| chr1 | +(196800534..196801100) | 566  | 1.94055 | 21 | 14 | 7  | 0.3333333 | 0.00288676 | CFHR1    | CFHR4     |
| chr1 | +(196883534..196884512) | 978  | 0.01075 | 33 | 11 | 22 | 0.3333333 | 0.18987487 | CFHR4    | CFHR2     |
| chr1 | +(198681871..198682381) | 510  | 4.18167 | 10 | 4  | 6  | 0.2       | 0.005      | PTPRC    | MIR181B1  |
| chr1 | +(200534338..200535001) | 663  | 0.94117 | 11 | 5  | 6  | 0.0909091 | 0.00881105 | ZNF281   | KIF14     |
| chr1 | +(200959702..200960402) | 700  | 0.06522 | 17 | 8  | 9  | 0.0588235 | 0.19323812 | C1orf106 | KIF21B    |
| chr1 | +(201061038..201061738) | 700  | 0.94117 | 9  | 6  | 3  | 0.3333333 | 0.274      | KIF21B   | CACNA1S   |
| chr1 | +(201072535..201073087) | 552  | 4.18167 | 11 | 5  | 6  | 0.0909091 | 0.03394459 | KIF21B   | CACNA1S   |
| chr1 | +(201253652..201254427) | 775  | 0.01616 | 14 | 9  | 5  | 0.2857143 | 0.0013499  | PKP1     | TNNT2     |
| chr1 | +(201300821..201301515) | 694  | 0.46268 | 9  | 3  | 6  | 0.3333333 | 0.012      | PKP1     | TNNT2     |
| chr1 | +(202092055..202092651) | 596  | 0.06522 | 16 | 5  | 11 | 0.375     | 0.14091036 | GPR37L1  | ARL8A     |
| chr1 | +(202146096..202146640) | 544  | 1.94055 | 7  | 3  | 4  | 0.1428571 | 0.029      | PTPRVP   | LGR6      |
| chr1 | +(202152005..202152709) | 704  | 0.46268 | 13 | 9  | 4  | 0.3846154 | 0.001      | PTPRVP   | LGR6      |
| chr1 | +(202287854..202288526) | 672  | 0.94117 | 11 | 4  | 7  | 0.2727273 | 0.206      | LGR6     | UBE2T     |
| chr1 | +(203052734..203053434) | 700  | 0.11833 | 16 | 5  | 11 | 0.375     | 0.19775658 | PPFIA4   | MYOG      |
| chr1 | +(203054834..203055482) | 648  | 0.11833 | 11 | 5  | 6  | 0.0909091 | 0.00308495 | PPFIA4   | MYOG      |
| chr1 | +(203134106..203134716) | 610  | 4.18167 | 6  | 4  | 2  | 0.3333333 | 0.067      | ADORA1   | MYBPH     |
| chr1 | +(203455668..203456368) | 700  | 0.46268 | 9  | 3  | 6  | 0.3333333 | 0.012      | PRELP    | OPTC      |
| chr1 | +(204228457..204229063) | 606  | 4.18167 | 12 | 4  | 8  | 0.3333333 | 0.341      | GOLT1A   | PLEKHA6   |
| chr1 | +(204506978..204507578) | 600  | 4.18167 | 9  | 6  | 3  | 0.3333333 | 0.131      | MDM4     | LRRN2     |
| chr1 | +(204587618..204588467) | 849  | 1.94055 | 13 | 4  | 9  | 0.3846154 | 0.02       | MDM4     | LRRN2     |
| chr1 | +(204760654..204761354) | 700  | 0.22348 | 15 | 5  | 10 | 0.3333333 | 0.99890018 | LRRN2    | NFASC     |
| chr1 | +(204944177..204944691) | 514  | 4.18167 | 6  | 3  | 3  | 0         | 0.05       | NFASC    | CNTN2     |
| chr1 | +(204966200..204966760) | 560  | 0.46268 | 10 | 4  | 6  | 0.2       | 0.005      | NFASC    | CNTN2     |
| chr1 | +(205018609..205019227) | 618  | 0.46268 | 9  | 4  | 5  | 0.1111111 | 0.008      | CNTN2    | TMEM81    |
| chr1 | +(205487661..205488361) | 700  | 0.11833 | 15 | 5  | 10 | 0.3333333 | 0.27014569 | CDK18    | LOC284578 |
| chr1 | +(205495612..205496160) | 548  | 4.18167 | 6  | 4  | 2  | 0.3333333 | 0.067      | CDK18    | LOC284578 |
| chr1 | +(205817009..205817516) | 507  | 1.94055 | 10 | 7  | 3  | 0.4       | 0.008      | SLC41A1  | PM20D1    |
| chr1 | +(206318919..206319450) | 531  | 0.22348 | 13 | 5  | 8  | 0.2307692 | 0.0017074  | CTSE     | SRGAP2    |
| chr1 | +(206324999..206325619) | 620  | 1.94055 | 11 | 6  | 5  | 0.0909091 | 0.00308495 | CTSE     | SRGAP2    |
| chr1 | +(206515756..206516714) | 958  | 0.22348 | 61 | 38 | 23 | 0.2459016 | 0.00733301 | CTSE     | SRGAP2    |
| chr1 | +(206579696..206580281) | 585  | 3.70843 | 30 | 15 | 15 | 0         | 0.00016671 | SRGAP2   | IKBKE     |
| chr1 | +(206642851..206644117) | 1266 | 4.18167 | 12 | 6  | 6  | 0         | 0.00197388 | SRGAP2   | IKBKE     |
| chr1 | +(206651002..206651926) | 924  | 0.02727 | 22 | 14 | 8  | 0.2727273 | 0.97200196 | IKBKE    | RASSF5    |
| chr1 | +(206776273..206776858) | 585  | 4.18167 | 12 | 6  | 6  | 0         | 0.96091545 | RASSF5   | LGTM      |

|      |                         |      |         |    |   |   |           |            |          |          |
|------|-------------------------|------|---------|----|---|---|-----------|------------|----------|----------|
| chr1 | +(206831363..206832059) | 696  | 4.18167 | 11 | 5 | 6 | 0.0909091 | 0.99691505 | DYRK3    | MAPKAPK2 |
| chr1 | +(206905073..206905609) | 536  | 1.58044 | 13 | 4 | 9 | 0.3846154 | 0.001      | MAPKAPK2 | IL10     |
| chr1 | +(207072389..207072965) | 576  | 0.46268 | 9  | 4 | 5 | 0.1111111 | 0.008      | IL24     | FAIM3    |
| chr1 | +(207104904..207105409) | 505  | 4.18167 | 12 | 7 | 5 | 0.1666667 | 0.53235847 | FAIM3    | PIGR     |
| chr1 | +(207731772..207732341) | 569  | 4.18167 | 12 | 6 | 6 | 0         | 0.07477068 | CR1      | CR1L     |
| chr1 | +(207733966..207734495) | 529  | 4.18167 | 16 | 8 | 8 | 0         | 0.70024491 | CR1      | CR1L     |
| chr1 | +(207741186..207741722) | 536  | 1.94055 | 9  | 6 | 3 | 0.3333333 | 0.048      | CR1      | CR1L     |
| chr1 | +(207743223..207743727) | 504  | 4.18167 | 13 | 6 | 7 | 0.0769231 | 0.07656373 | CR1      | CR1L     |
| chr1 | +(207753671..207754181) | 510  | 4.18167 | 9  | 6 | 3 | 0.3333333 | 0.274      | CR1      | CR1L     |
| chr1 | +(207828261..207828812) | 551  | 4.18167 | 6  | 4 | 2 | 0.3333333 | 0.067      | CR1L     | CD46     |
| chr1 | +(211033964..211034487) | 523  | 4.18167 | 6  | 3 | 3 | 0         | 0.05       | HHAT     | KCNH1    |
| chr1 | +(211976436..211977051) | 615  | 0.46268 | 9  | 4 | 5 | 0.1111111 | 0.008      | NEK2     | LPGAT1   |
| chr1 | +(214505111..214505678) | 567  | 4.18167 | 6  | 4 | 2 | 0.3333333 | 0.067      | SMYD2    | PTPN14   |
| chr1 | +(214802023..214802542) | 519  | 0.94117 | 13 | 5 | 8 | 0.2307692 | 0.00958624 | CENPF    | KCNK2    |
| chr1 | +(214824770..214825308) | 538  | 0.94117 | 15 | 7 | 8 | 0.0666667 | 0.08245742 | CENPF    | KCNK2    |
| chr1 | +(215802112..215802644) | 532  | 4.18167 | 11 | 6 | 5 | 0.0909091 | 0.05017413 | KCTD3    | USH2A    |
| chr1 | +(215823690..215824233) | 543  | 4.18167 | 6  | 4 | 2 | 0.3333333 | 0.067      | KCTD3    | USH2A    |
| chr1 | +(217207831..217208373) | 542  | 4.18167 | 6  | 2 | 4 | 0.3333333 | 0.067      | USH2A    | ESRRG    |
| chr1 | +(217312766..217313894) | 1128 | 4.18167 | 12 | 6 | 6 | 0         | 0.00197388 | ESRRG    | GPATCH2  |
| chr1 | +(220174482..220174999) | 517  | 1.94055 | 12 | 7 | 5 | 0.1666667 | 0.00224163 | SLC30A10 | EPRS     |
| chr1 | +(220363047..220363549) | 502  | 4.18167 | 10 | 5 | 5 | 0         | 0.03790009 | MIR194-1 | RAB3GAP2 |
| chr1 | +(220375444..220376023) | 579  | 0.94117 | 12 | 8 | 4 | 0.3333333 | 0.99671074 | MIR194-1 | RAB3GAP2 |
| chr1 | +(220754139..220754836) | 697  | 0.94117 | 12 | 7 | 5 | 0.1666667 | 0.00926649 | MARK1    | C1orf115 |
| chr1 | +(220969813..220970483) | 670  | 0.46268 | 9  | 4 | 5 | 0.1111111 | 0.008      | MOSC1    | HLX      |
| chr1 | +(223396582..223397226) | 644  | 0.94117 | 8  | 3 | 5 | 0.25      | 0.018      | TLR5     | SUSD4    |
| chr1 | +(223400789..223401304) | 515  | 4.18167 | 9  | 3 | 6 | 0.3333333 | 0.988      | TLR5     | SUSD4    |
| chr1 | +(223943258..223943910) | 652  | 1.94055 | 10 | 7 | 3 | 0.4       | 0.258      | CAPN2    | TP53BP2  |
| chr1 | +(223959158..223959845) | 687  | 4.18167 | 9  | 3 | 6 | 0.3333333 | 0.024      | CAPN2    | TP53BP2  |
| chr1 | +(225155007..225155532) | 525  | 0.22348 | 10 | 6 | 4 | 0.2       | 0.005      | DNAH14   | LBR      |
| chr1 | +(225452908..225453414) | 506  | 4.18167 | 9  | 4 | 5 | 0.1111111 | 0.032      | DNAH14   | LBR      |
| chr1 | +(226061740..226062414) | 674  | 0.94117 | 12 | 4 | 8 | 0.3333333 | 0.00328926 | EPHX1    | TMEM63A  |
| chr1 | +(226587951..226588651) | 700  | 0.94117 | 12 | 4 | 8 | 0.3333333 | 0.00328926 | LIN9     | PARP1    |
| chr1 | +(226871660..226872511) | 851  | 0.06522 | 12 | 6 | 6 | 0         | 0.00197388 | C1orf95  | ITPKB    |
| chr1 | +(226987267..226987967) | 700  | 1.94055 | 11 | 4 | 7 | 0.2727273 | 0.997      | ITPKB    | PSEN2    |

|      |                         |      |         |    |    |    |           |            |              |              |
|------|-------------------------|------|---------|----|----|----|-----------|------------|--------------|--------------|
| chr1 | +(227075620..227076197) | 577  | 4.18167 | 8  | 3  | 5  | 0.25      | 0.036      | PSEN2        | ADCK3        |
| chr1 | +(227127875..227128488) | 613  | 1.94055 | 7  | 3  | 4  | 0.1428571 | 0.029      | PSEN2        | ADCK3        |
| chr1 | +(227452422..227452975) | 553  | 4.18167 | 9  | 5  | 4  | 0.1111111 | 0.032      | ADCK3        | CDC42BPA     |
| chr1 | +(227668628..227670012) | 1384 | 1.94055 | 15 | 8  | 7  | 0.0666667 | 0.00059687 | CDC42BPA     | ZNF678       |
| chr1 | +(228204502..228205202) | 700  | 0.22348 | 13 | 5  | 8  | 0.2307692 | 0.0017074  | WNT3A        | ARF1         |
| chr1 | +(228272209..228272909) | 700  | 0.22348 | 10 | 3  | 7  | 0.4       | 0.008      | ARF1         | MIR3620      |
| chr1 | +(228431929..228432432) | 503  | 4.18167 | 10 | 5  | 5  | 0         | 0.12529603 | OBSCN        | TRIM11       |
| chr1 | +(228459729..228460268) | 539  | 0.94117 | 9  | 6  | 3  | 0.3333333 | 0.012      | OBSCN        | TRIM11       |
| chr1 | +(228476129..228476741) | 612  | 1.94055 | 10 | 4  | 6  | 0.2       | 0.019      | OBSCN        | TRIM11       |
| chr1 | +(228553928..228554431) | 503  | 1.94055 | 8  | 4  | 4  | 0         | 0.014      | OBSCN        | TRIM11       |
| chr1 | +(229567079..229567621) | 542  | 0.46268 | 13 | 8  | 5  | 0.2307692 | 0.00641335 | C1orf96      | ACTA1        |
| chr1 | +(230020456..230020991) | 535  | 1.94055 | 10 | 3  | 7  | 0.4       | 0.008      | URB2         | GALNT2       |
| chr1 | +(230385776..230386413) | 637  | 4.18167 | 10 | 4  | 6  | 0.2       | 0.01       | GALNT2       | PGBD5        |
| chr1 | +(230416388..230416910) | 522  | 4.18167 | 10 | 6  | 4  | 0.2       | 0.005      | GALNT2       | PGBD5        |
| chr1 | +(230454840..230456110) | 1270 | 0.94117 | 16 | 8  | 8  | 0         | 0.99961123 | GALNT2       | PGBD5        |
| chr1 | +(230479927..230480627) | 700  | 0.46268 | 9  | 3  | 6  | 0.3333333 | 0.012      | GALNT2       | PGBD5        |
| chr1 | +(231156523..231157110) | 587  | 0.94117 | 8  | 4  | 4  | 0         | 0.014      | ARV1         | FAM89A       |
| chr1 | +(231696643..231697490) | 847  | 0.94117 | 22 | 12 | 10 | 0.0909091 | 0.62918298 | TSNAX-DISC1  | LOC100287814 |
| chr1 | +(232538768..232539270) | 502  | 4.18167 | 7  | 3  | 4  | 0.1428571 | 0.029      | DISC2        | SIPA1L2      |
| chr1 | +(232550262..232550785) | 523  | 0.94117 | 9  | 3  | 6  | 0.3333333 | 0.083      | DISC2        | SIPA1L2      |
| chr1 | +(235772687..235773893) | 1206 | 4.18167 | 12 | 6  | 6  | 0         | 0.00197388 | B3GALNT2     | GNG4         |
| chr1 | +(235897391..235897896) | 505  | 4.18167 | 8  | 5  | 3  | 0.25      | 0.018      | GNG4         | LYST         |
| chr1 | +(235940371..235940882) | 511  | 4.18167 | 9  | 5  | 4  | 0.1111111 | 0.548      | GNG4         | LYST         |
| chr1 | +(236176492..236177145) | 653  | 0.46268 | 10 | 5  | 5  | 0         | 0.00451172 | MIR1537      | NID1         |
| chr1 | +(236751201..236751752) | 551  | 4.18167 | 7  | 3  | 4  | 0.1428571 | 0.029      | LOC100287902 | HEATR1       |
| chr1 | +(236922831..236923337) | 506  | 4.18167 | 6  | 4  | 2  | 0.3333333 | 0.067      | ACTN2        | MTR          |
| chr1 | +(237059051..237059815) | 764  | 0.00319 | 20 | 11 | 9  | 0.1       | 8.472E-05  | MTR          | RYR2         |
| chr1 | +(237527427..237527989) | 562  | 0.11833 | 18 | 11 | 7  | 0.2222222 | 0.0002444  | RYR2         | LOC100130331 |
| chr1 | +(237733855..237735129) | 1274 | 0.46268 | 16 | 10 | 6  | 0.25      | 0.99943095 | RYR2         | LOC100130331 |
| chr1 | +(237791258..237792147) | 889  | 0.00319 | 19 | 11 | 8  | 0.1578947 | 0.00013997 | RYR2         | LOC100130331 |
| chr1 | +(237801647..237802627) | 980  | 0.94117 | 21 | 13 | 8  | 0.2380952 | 0.00236841 | RYR2         | LOC100130331 |
| chr1 | +(237958326..237958858) | 532  | 1.94055 | 8  | 5  | 3  | 0.25      | 0.018      | RYR2         | LOC100130331 |
| chr1 | +(237969229..237969739) | 510  | 4.18167 | 10 | 4  | 6  | 0.2       | 0.057      | RYR2         | LOC100130331 |
| chr1 | +(240491734..240492421) | 687  | 0.46268 | 9  | 3  | 6  | 0.3333333 | 0.012      | FMN2         | GREM2        |

|      |                         |      |         |    |    |    |           |            |           |          |   |
|------|-------------------------|------|---------|----|----|----|-----------|------------|-----------|----------|---|
| chr1 | +(241031773..241032301) | 528  | 1.94055 | 11 | 7  | 4  | 0.2727273 | 0.206      | GREM2     | RGS7     |   |
| chr1 | +(241307813..241308377) | 564  | 4.18167 | 10 | 4  | 6  | 0.2       | 0.995      | GREM2     | RGS7     |   |
| chr1 | +(243449318..243449819) | 501  | 4.18167 | 12 | 5  | 7  | 0.1666667 | 0.08373231 | SDCCAG8   | AKT3     |   |
| chr1 | +(243578867..243579455) | 588  | 0.11833 | 13 | 5  | 8  | 0.2307692 | 0.02851994 | SDCCAG8   | AKT3     |   |
| chr1 | +(243623274..243624180) | 906  | 0.94117 | 15 | 8  | 7  | 0.0666667 | 0.00059687 | SDCCAG8   | AKT3     |   |
| chr1 | +(243776791..243777481) | 690  | 0.22348 | 17 | 9  | 8  | 0.0588235 | 0.00037875 | SDCCAG8   | AKT3     |   |
| chr1 | +(244220144..244220664) | 520  | 1.94055 | 11 | 5  | 6  | 0.0909091 | 0.02230486 | ZNF238    | C1orf100 |   |
| chr1 | +(244852357..244852860) | 503  | 1.94055 | 12 | 5  | 7  | 0.1666667 | 0.40377055 | PPPDE1    | FAM36A   |   |
| chr1 | +(245332192..245332737) | 545  | 0.46268 | 9  | 4  | 5  | 0.1111111 | 0.008      | KIF26B    | SMYD3    |   |
| chr1 | +(245333283..245333873) | 590  | 4.18167 | 6  | 4  | 2  | 0.3333333 | 0.067      | KIF26B    | SMYD3    |   |
| chr1 | +(246155950..246157089) | 1139 | 0.02727 | 21 | 13 | 8  | 0.2380952 | 0.99991702 | KIF26B    | SMYD3    |   |
| chr1 | +(246739076..246740712) | 1636 | 0.11833 | 25 | 14 | 11 | 0.12      | 0.99998753 | CNST      | SCCPDH   |   |
| chr1 | +(247023984..247024595) | 611  | 4.18167 | 6  | 2  | 4  | 0.3333333 | 0.067      | LOC149134 | AHCTF1   |   |
| chr1 | +(247025332..247026016) | 684  | 0.94117 | 12 | 7  | 5  | 0.1666667 | 0.53235847 | LOC149134 | AHCTF1   |   |
| chr1 | +(247057689..247058258) | 569  | 4.18167 | 10 | 4  | 6  | 0.2       | 0.005      | LOC149134 | AHCTF1   |   |
| chr1 | +(248099444..248100115) | 671  | 0.94117 | 8  | 4  | 4  | 0         | 0.014      | OR2T8     | OR2L13   |   |
| chr1 | +(248246735..248247274) | 539  | 0.22348 | 19 | 9  | 10 | 0.0526316 | 0.95679462 | OR2L3     | OR2M1P   |   |
| chr1 | +(248262645..248263297) | 652  | 4.18167 | 13 | 5  | 8  | 0.2307692 | 0.02021199 | OR2L3     | OR2M1P   |   |
| chr1 | +(248343618..248344162) | 544  | 1.94055 | 13 | 9  | 4  | 0.3846154 | 0.53       | OR2M2     | OR2M3    | v |
| chr1 | +(248366092..248366604) | 512  | 4.18167 | 17 | 11 | 6  | 0.2941176 | 0.42034633 | OR2M2     | OR2M3    | v |
| chr1 | +(248402582..248403114) | 532  | 0.94117 | 12 | 5  | 7  | 0.1666667 | 0.01417552 | OR2M4     | OR2T33   |   |
| chr2 | +(464665..465187)       | 522  | 4.63887 | 6  | 3  | 3  | 0         | 0.05       | FAM150B   | TMEM18   |   |
| chr2 | +(565078..565765)       | 687  | 0.64523 | 9  | 5  | 4  | 0.1111111 | 0.008      | FAM150B   | TMEM18   |   |
| chr2 | +(669421..669983)       | 562  | 1.21424 | 9  | 6  | 3  | 0.3333333 | 0.012      | FAM150B   | TMEM18   |   |
| chr2 | +(1421533..1422211)     | 678  | 4.63887 | 6  | 3  | 3  | 0         | 0.05       | TPO       | PXDN     |   |
| chr2 | +(1566169..1566866)     | 697  | 0.325   | 10 | 6  | 4  | 0.2       | 0.005      | TPO       | PXDN     |   |
| chr2 | +(1724547..1725247)     | 700  | 0.64523 | 9  | 3  | 6  | 0.3333333 | 0.012      | TPO       | PXDN     |   |
| chr2 | +(1991020..1991720)     | 700  | 0.18049 | 12 | 5  | 7  | 0.1666667 | 0.00224163 | PXDN      | MYT1L    |   |
| chr2 | +(1997790..1998344)     | 554  | 2.33844 | 7  | 3  | 4  | 0.1428571 | 0.029      | PXDN      | MYT1L    |   |
| chr2 | +(2760688..2761310)     | 622  | 2.33844 | 7  | 4  | 3  | 0.1428571 | 0.029      | LOC730811 | TSSC1    |   |
| chr2 | +(2796186..2797028)     | 842  | 0.08723 | 21 | 9  | 12 | 0.1428571 | 0.00525762 | LOC730811 | TSSC1    |   |
| chr2 | +(2799187..2799887)     | 700  | 0.325   | 10 | 4  | 6  | 0.2       | 0.005      | LOC730811 | TSSC1    |   |
| chr2 | +(2838850..2839550)     | 700  | 1.21424 | 13 | 8  | 5  | 0.2307692 | 0.0017074  | LOC730811 | TSSC1    |   |
| chr2 | +(2853340..2853971)     | 631  | 0.04989 | 13 | 9  | 4  | 0.3846154 | 0.001      | LOC730811 | TSSC1    |   |

|      |                       |      |         |    |    |    |           |            |           |           |
|------|-----------------------|------|---------|----|----|----|-----------|------------|-----------|-----------|
| chr2 | +(3038819..3039521)   | 702  | 0.18049 | 12 | 8  | 4  | 0.3333333 | 0.99671074 | LOC730811 | TSSC1     |
| chr2 | +(3044800..3045372)   | 572  | 2.33844 | 10 | 7  | 3  | 0.4       | 0.992      | LOC730811 | TSSC1     |
| chr2 | +(3058530..3059089)   | 559  | 4.63887 | 6  | 2  | 4  | 0.3333333 | 0.067      | LOC730811 | TSSC1     |
| chr2 | +(3212311..3212832)   | 521  | 2.33844 | 9  | 3  | 6  | 0.3333333 | 0.083      | LOC730811 | TSSC1     |
| chr2 | +(3254758..3255317)   | 559  | 4.63887 | 6  | 3  | 3  | 0         | 0.05       | LOC730811 | TSSC1     |
| chr2 | +(3260379..3261329)   | 950  | 3.0624  | 23 | 10 | 13 | 0.1304348 | 2.7755E-05 | LOC730811 | TSSC1     |
| chr2 | +(3267073..3267662)   | 589  | 2.33844 | 7  | 3  | 4  | 0.1428571 | 0.029      | LOC730811 | TSSC1     |
| chr2 | +(3288247..3288760)   | 513  | 2.33844 | 7  | 4  | 3  | 0.1428571 | 0.029      | LOC730811 | TSSC1     |
| chr2 | +(3298917..3299730)   | 813  | 0.18049 | 12 | 7  | 5  | 0.1666667 | 0.00224163 | LOC730811 | TSSC1     |
| chr2 | +(3309171..3309871)   | 700  | 0.64523 | 13 | 9  | 4  | 0.3846154 | 0.999      | LOC730811 | TSSC1     |
| chr2 | +(3681416..3682116)   | 700  | 0.18049 | 11 | 5  | 6  | 0.0909091 | 0.00308495 | COLEC11   | ALLC      |
| chr2 | +(5350891..5351672)   | 781  | 0.0149  | 15 | 8  | 7  | 0.0666667 | 0.00059687 | LOC727982 | SOX11     |
| chr2 | +(5835029..5835533)   | 504  | 4.63887 | 10 | 6  | 4  | 0.2       | 0.176      | SOX11     | LOC150622 |
| chr2 | +(6105161..6105663)   | 502  | 4.63887 | 6  | 4  | 2  | 0.3333333 | 0.067      | LOC150622 | LOC400940 |
| chr2 | +(9034712..9035306)   | 594  | 1.21424 | 8  | 4  | 4  | 0         | 0.014      | KIDINS220 | MBOAT2    |
| chr2 | +(9398852..9399551)   | 699  | 0.325   | 10 | 7  | 3  | 0.4       | 0.008      | ASAP2     | ITGB1BP1  |
| chr2 | +(9463035..9463579)   | 544  | 4.63887 | 6  | 2  | 4  | 0.3333333 | 0.067      | ASAP2     | ITGB1BP1  |
| chr2 | +(9573827..9574328)   | 501  | 4.63887 | 7  | 4  | 3  | 0.1428571 | 0.029      | CPSF3     | IAH1      |
| chr2 | +(9576130..9576647)   | 517  | 4.63887 | 9  | 4  | 5  | 0.1111111 | 0.143      | CPSF3     | IAH1      |
| chr2 | +(10199763..10200384) | 621  | 2.33844 | 7  | 3  | 4  | 0.1428571 | 0.029      | KLF11     | CYS1      |
| chr2 | +(10260191..10260925) | 734  | 0.18049 | 18 | 10 | 8  | 0.1111111 | 0.0038429  | CYS1      | RRM2      |
| chr2 | +(10262673..10263278) | 605  | 4.63887 | 7  | 3  | 4  | 0.1428571 | 0.029      | CYS1      | RRM2      |
| chr2 | +(10281750..10282326) | 576  | 4.63887 | 8  | 5  | 3  | 0.25      | 0.125      | C2orf48   | MIR4261   |
| chr2 | +(10283202..10283891) | 689  | 4.63887 | 6  | 3  | 3  | 0         | 0.05       | C2orf48   | MIR4261   |
| chr2 | +(10284706..10285406) | 700  | 0.64523 | 9  | 3  | 6  | 0.3333333 | 0.012      | C2orf48   | MIR4261   |
| chr2 | +(11358874..11359383) | 509  | 4.63887 | 9  | 5  | 4  | 0.1111111 | 0.032      | PQLC3     | ROCK2     |
| chr2 | +(11397238..11397739) | 501  | 2.33844 | 7  | 3  | 4  | 0.1428571 | 0.029      | PQLC3     | ROCK2     |
| chr2 | +(11448237..11448833) | 596  | 2.33844 | 11 | 5  | 6  | 0.0909091 | 0.10062131 | PQLC3     | ROCK2     |
| chr2 | +(11730860..11731501) | 641  | 4.63887 | 7  | 4  | 3  | 0.1428571 | 0.2        | GREB1     | NTSR2     |
| chr2 | +(11732810..11733358) | 548  | 2.33844 | 7  | 4  | 3  | 0.1428571 | 0.029      | GREB1     | NTSR2     |
| chr2 | +(11924553..11925332) | 779  | 0.03019 | 14 | 6  | 8  | 0.1428571 | 0.00097289 | LPIN1     | MIR4262   |
| chr2 | +(15731477..15732539) | 1062 | 0.64523 | 22 | 8  | 14 | 0.2727273 | 0.01447835 | NBAS      | DDX1      |
| chr2 | +(15760947..15761470) | 523  | 4.63887 | 6  | 4  | 2  | 0.3333333 | 0.067      | DDX1      | MYCNOS    |
| chr2 | +(15947854..15949033) | 1179 | 1.21424 | 14 | 7  | 7  | 0         | 0.98732634 | DDX1      | MYCNOS    |

|      |                       |      |         |    |    |    |           |            |           |          |   |
|------|-----------------------|------|---------|----|----|----|-----------|------------|-----------|----------|---|
| chr2 | +(17695076..17695624) | 548  | 1.21424 | 10 | 3  | 7  | 0.4       | 0.008      | FAM49A    | RAD51AP2 |   |
| chr2 | +(17864509..17865202) | 693  | 0.64523 | 13 | 4  | 9  | 0.3846154 | 0.02       | VSNL1     | SMC6     |   |
| chr2 | +(19556159..19556707) | 548  | 2.33844 | 11 | 5  | 6  | 0.0909091 | 0.81934478 | NT5C1B    | OSR1     | v |
| chr2 | +(19853037..19853737) | 700  | 0.325   | 11 | 4  | 7  | 0.2727273 | 0.003      | OSR1      | FLJ12334 | v |
| chr2 | +(20078213..20078913) | 700  | 1.21424 | 11 | 7  | 4  | 0.2727273 | 0.003      | FLJ12334  | TTC32    |   |
| chr2 | +(20101283..20101922) | 639  | 0.08723 | 12 | 8  | 4  | 0.3333333 | 0.99671074 | FLJ12334  | TTC32    |   |
| chr2 | +(20305268..20306510) | 1242 | 0.08723 | 23 | 12 | 11 | 0.0434783 | 0.99997567 | LAPTM4A   | SDC1     |   |
| chr2 | +(20404064..20404764) | 700  | 1.21424 | 11 | 6  | 5  | 0.0909091 | 0.00308495 | LAPTM4A   | SDC1     |   |
| chr2 | +(20412432..20413426) | 994  | 2.33844 | 16 | 7  | 9  | 0.125     | 0.13318996 | LAPTM4A   | SDC1     |   |
| chr2 | +(20454415..20455003) | 588  | 2.33844 | 11 | 5  | 6  | 0.0909091 | 0.00308495 | SDC1      | PUM2     |   |
| chr2 | +(21102055..21102770) | 715  | 0.00246 | 20 | 11 | 9  | 0.1       | 0.00172235 | C2orf43   | APOB     |   |
| chr2 | +(21245502..21246007) | 505  | 4.63887 | 6  | 2  | 4  | 0.3333333 | 0.067      | C2orf43   | APOB     |   |
| chr2 | +(21251169..21251744) | 575  | 4.63887 | 10 | 6  | 4  | 0.2       | 0.086      | C2orf43   | APOB     |   |
| chr2 | +(21362564..21363073) | 509  | 4.63887 | 10 | 4  | 6  | 0.2       | 0.129      | APOB      | KLHL29   |   |
| chr2 | +(23437431..23438131) | 700  | 0.08723 | 13 | 5  | 8  | 0.2307692 | 0.0017074  | APOB      | KLHL29   |   |
| chr2 | +(23609340..23609856) | 516  | 2.33844 | 7  | 4  | 3  | 0.1428571 | 0.029      | KLHL29    | ATAD2B   |   |
| chr2 | +(23679592..23680315) | 723  | 1.21424 | 14 | 8  | 6  | 0.1428571 | 0.00097289 | KLHL29    | ATAD2B   |   |
| chr2 | +(23712677..23713339) | 662  | 2.33844 | 10 | 4  | 6  | 0.2       | 0.457      | KLHL29    | ATAD2B   |   |
| chr2 | +(23771780..23772480) | 700  | 0.64523 | 12 | 8  | 4  | 0.3333333 | 0.99671074 | KLHL29    | ATAD2B   |   |
| chr2 | +(23834019..23834719) | 700  | 0.00954 | 16 | 5  | 11 | 0.375     | 0.0009184  | KLHL29    | ATAD2B   |   |
| chr2 | +(24432387..24433004) | 617  | 4.63887 | 8  | 3  | 5  | 0.25      | 0.018      | C2orf84   | ITSN2    |   |
| chr2 | +(25083370..25083887) | 517  | 4.63887 | 9  | 5  | 4  | 0.1111111 | 0.635      | CENPO     | ADCY3    |   |
| chr2 | +(25213884..25214508) | 624  | 2.33844 | 11 | 5  | 6  | 0.0909091 | 0.00308495 | LOC729723 | EFR3B    |   |
| chr2 | +(25513806..25514400) | 594  | 4.63887 | 6  | 4  | 2  | 0.3333333 | 0.067      | POMC      | DNMT3A   |   |
| chr2 | +(25519064..25520045) | 981  | 0.18049 | 20 | 12 | 8  | 0.2       | 0.26854699 | POMC      | DNMT3A   |   |
| chr2 | +(25994205..25994810) | 605  | 4.63887 | 10 | 6  | 4  | 0.2       | 0.019      | DTNB      | ASXL2    |   |
| chr2 | +(26532561..26533091) | 530  | 2.33844 | 10 | 3  | 7  | 0.4       | 0.008      | HADHB     | GPR113   |   |
| chr2 | +(26705016..26705865) | 849  | 0.04989 | 19 | 6  | 13 | 0.3684211 | 0.00327517 | C2orf39   | OTOF     |   |
| chr2 | +(26784347..26784948) | 601  | 4.63887 | 6  | 2  | 4  | 0.3333333 | 0.067      | OTOF      | C2orf70  |   |
| chr2 | +(26799714..26800627) | 913  | 2.33844 | 13 | 5  | 8  | 0.2307692 | 0.92838254 | C2orf70   | CIB4     |   |
| chr2 | +(26852124..26852778) | 654  | 4.63887 | 6  | 2  | 4  | 0.3333333 | 0.067      | C2orf70   | CIB4     |   |
| chr2 | +(26943225..26944443) | 1218 | 0.64523 | 15 | 9  | 6  | 0.2       | 0.99926864 | KCNK3     | C2orf18  |   |
| chr2 | +(27033094..27033794) | 700  | 0.64523 | 9  | 3  | 6  | 0.3333333 | 0.012      | CENPA     | DPYSL5   |   |
| chr2 | +(27121201..27121702) | 501  | 3.0624  | 19 | 6  | 13 | 0.3684211 | 0.98870655 | DPYSL5    | MAPRE3   |   |



|      |                       |      |         |    |    |    |           |            |              |           |
|------|-----------------------|------|---------|----|----|----|-----------|------------|--------------|-----------|
| chr2 | +(27263247..27263788) | 541  | 4.63887 | 10 | 7  | 3  | 0.4       | 0.008      | TMEM214      | AGBL5     |
| chr2 | +(27360280..27360789) | 509  | 2.33844 | 8  | 3  | 5  | 0.25      | 0.286      | PREB         | C2orf53   |
| chr2 | +(27423228..27423772) | 544  | 2.33844 | 8  | 4  | 4  | 0         | 0.171      | TCF23        | SLC5A6    |
| chr2 | +(27465496..27466535) | 1039 | 0.08723 | 18 | 10 | 8  | 0.1111111 | 0.96221971 | CAD          | SLC30A3   |
| chr2 | +(27804685..27805237) | 552  | 1.21424 | 17 | 7  | 10 | 0.1764706 | 0.1207833  | C2orf16      | ZNF512    |
| chr2 | +(27887872..27888381) | 509  | 4.63887 | 7  | 3  | 4  | 0.1428571 | 0.029      | SLC4A1AP     | MRPL33    |
| chr2 | +(28544998..28545698) | 700  | 0.325   | 12 | 4  | 8  | 0.3333333 | 0.00328926 | MIR4263      | FOSL2     |
| chr2 | +(28561072..28562047) | 975  | 0.64523 | 15 | 9  | 6  | 0.2       | 0.00073136 | MIR4263      | FOSL2     |
| chr2 | +(29296613..29297232) | 619  | 2.33844 | 14 | 9  | 5  | 0.2857143 | 0.42074029 | FAM179A      | C2orf71   |
| chr2 | +(29452277..29452975) | 698  | 0.325   | 14 | 7  | 7  | 0         | 0.67263958 | CLIP4        | ALK       |
| chr2 | +(31146993..31147510) | 517  | 4.63887 | 11 | 6  | 5  | 0.0909091 | 0.29194121 | CAPN13       | GALNT14   |
| chr2 | +(32191308..32191830) | 522  | 1.21424 | 8  | 5  | 3  | 0.25      | 0.018      | SRD5A2       | MEMO1     |
| chr2 | +(32427731..32428297) | 566  | 4.63887 | 8  | 4  | 4  | 0         | 0.443      | SLC30A6      | NLRC4     |
| chr2 | +(32875027..32875573) | 546  | 1.21424 | 12 | 8  | 4  | 0.3333333 | 0.99671074 | TTC27        | LOC285045 |
| chr2 | +(33572027..33572953) | 926  | 1.21424 | 15 | 8  | 7  | 0.0666667 | 0.24372665 | LTBP1        | RASGRP3   |
| chr2 | +(33813305..33813864) | 559  | 4.63887 | 6  | 2  | 4  | 0.3333333 | 0.067      | RASGRP3      | FAM98A    |
| chr2 | +(36805758..36806272) | 514  | 4.63887 | 8  | 4  | 4  | 0         | 0.014      | CRIM1        | FEZ2      |
| chr2 | +(37113729..37114238) | 509  | 3.0624  | 16 | 11 | 5  | 0.375     | 0.05022464 | VIT          | STRN      |
| chr2 | +(37129572..37130108) | 536  | 4.63887 | 6  | 4  | 2  | 0.3333333 | 0.067      | VIT          | STRN      |
| chr2 | +(37310783..37311470) | 687  | 2.33844 | 7  | 3  | 4  | 0.1428571 | 0.029      | STRN         | HEATR5B   |
| chr2 | +(37455448..37456053) | 605  | 2.33844 | 9  | 3  | 6  | 0.3333333 | 0.452      | SULT6B1      | CEBPZ     |
| chr2 | +(39192869..39193978) | 1109 | 0.64523 | 15 | 9  | 6  | 0.2       | 0.99890848 | LOC375196    | SOS1      |
| chr2 | +(42580142..42580644) | 502  | 4.63887 | 6  | 2  | 4  | 0.3333333 | 0.067      | EML4         | COX7A2L   |
| chr2 | +(42587611..42588311) | 700  | 2.33844 | 11 | 4  | 7  | 0.2727273 | 0.997      | EML4         | COX7A2L   |
| chr2 | +(42676446..42677146) | 700  | 2.33844 | 12 | 5  | 7  | 0.1666667 | 0.00224163 | COX7A2L      | KCNG3     |
| chr2 | +(43793283..43793813) | 530  | 0.64523 | 13 | 5  | 8  | 0.2307692 | 0.05367327 | LOC100129726 | THADA     |
| chr2 | +(43819099..43819647) | 548  | 2.33844 | 8  | 5  | 3  | 0.25      | 0.071      | LOC100129726 | THADA     |
| chr2 | +(43980572..43981128) | 556  | 4.63887 | 8  | 3  | 5  | 0.25      | 0.018      | LOC728819    | DYNC2LI1  |
| chr2 | +(44201035..44201566) | 531  | 2.33844 | 10 | 6  | 4  | 0.2       | 0.019      | ABCG8        | LRPPRC    |
| chr2 | +(44457561..44458102) | 541  | 2.33844 | 10 | 7  | 3  | 0.4       | 0.058      | PPM1B        | SLC3A1    |
| chr2 | +(45879946..45880646) | 700  | 4.63887 | 11 | 6  | 5  | 0.0909091 | 0.99691505 | PRKCE        | EPAS1     |
| chr2 | +(46788730..46789545) | 815  | 0.03019 | 14 | 7  | 7  | 0         | 0.00087256 | RHOQ         | PIGF      |
| chr2 | +(46985981..46986584) | 603  | 4.63887 | 12 | 5  | 7  | 0.1666667 | 0.40377055 | SOCS5        | LOC388948 |
| chr2 | +(47135939..47136475) | 536  | 4.63887 | 6  | 2  | 4  | 0.3333333 | 0.067      | LOC100134259 | MCFD2     |

|      |                       |      |         |    |   |    |           |            |          |              |   |
|------|-----------------------|------|---------|----|---|----|-----------|------------|----------|--------------|---|
| chr2 | +(47183612..47184298) | 686  | 1.21424 | 9  | 4 | 5  | 0.1111111 | 0.016      | TTC7A    | C2orf61      |   |
| chr2 | +(47185766..47186357) | 591  | 4.63887 | 8  | 4 | 4  | 0         | 0.443      | TTC7A    | C2orf61      |   |
| chr2 | +(47213507..47214094) | 587  | 1.21424 | 8  | 4 | 4  | 0         | 0.014      | TTC7A    | C2orf61      |   |
| chr2 | +(47215897..47216490) | 593  | 0.64523 | 13 | 5 | 8  | 0.2307692 | 0.0017074  | TTC7A    | C2orf61      |   |
| chr2 | +(47880776..47881670) | 894  | 0.08723 | 17 | 9 | 8  | 0.0588235 | 0.000266   | KCNK12   | MSH6         |   |
| chr2 | +(48033342..48033878) | 536  | 1.21424 | 8  | 5 | 3  | 0.25      | 0.018      | MSH6     | FBXO11       |   |
| chr2 | +(48915137..48915688) | 551  | 4.63887 | 8  | 4 | 4  | 0         | 0.057      | GTF2A1L  | LHCGR        |   |
| chr2 | +(54021310..54021819) | 509  | 4.63887 | 7  | 4 | 3  | 0.1428571 | 0.029      | ASB3     | LOC100302652 |   |
| chr2 | +(54114398..54114921) | 523  | 4.63887 | 12 | 8 | 4  | 0.3333333 | 0.533      | GPR75    | PSME4        |   |
| chr2 | +(55105284..55105984) | 700  | 0.18049 | 11 | 4 | 7  | 0.2727273 | 0.003      | EML6     | RTN4         |   |
| chr2 | +(55253710..55254225) | 515  | 4.63887 | 6  | 3 | 3  | 0         | 0.05       | EML6     | RTN4         |   |
| chr2 | +(55535918..55536458) | 540  | 1.21424 | 15 | 5 | 10 | 0.3333333 | 0.13517207 | PRORS1P  | CCDC88A      |   |
| chr2 | +(61148742..61149327) | 585  | 4.63887 | 7  | 4 | 3  | 0.1428571 | 0.2        | REL      | PUS10        |   |
| chr2 | +(61652360..61652944) | 584  | 4.63887 | 6  | 4 | 2  | 0.3333333 | 0.067      | AHSA2    | USP34        |   |
| chr2 | +(61715539..61716071) | 532  | 2.33844 | 10 | 5 | 5  | 0         | 0.01414006 | SNORA70B | XPO1         |   |
| chr2 | +(61719273..61719783) | 510  | 4.63887 | 11 | 7 | 4  | 0.2727273 | 0.536      | SNORA70B | XPO1         |   |
| chr2 | +(61958710..61959484) | 774  | 0.04989 | 13 | 6 | 7  | 0.0769231 | 0.0013499  | XPO1     | FAM161A      |   |
| chr2 | +(62067178..62067729) | 551  | 2.33844 | 14 | 7 | 7  | 0         | 0.24110135 | XPO1     | FAM161A      |   |
| chr2 | +(63651140..63651840) | 700  | 2.33844 | 14 | 7 | 7  | 0         | 0.00087256 | DBIL5P2  | C2orf86      |   |
| chr2 | +(65237402..65237973) | 571  | 4.63887 | 7  | 3 | 4  | 0.1428571 | 0.029      | SLC1A4   | CEP68        |   |
| chr2 | +(67631527..67632406) | 879  | 4.63887 | 13 | 7 | 6  | 0.0769231 | 0.95676186 | ETAA1    | C1D          |   |
| chr2 | +(67960419..67961283) | 864  | 1.21424 | 14 | 6 | 8  | 0.1428571 | 0.00097289 | ETAA1    | C1D          |   |
| chr2 | +(68429672..68430325) | 653  | 0.64523 | 9  | 5 | 4  | 0.1111111 | 0.008      | PNO1     | PPP3R1       |   |
| chr2 | +(69409393..69409967) | 574  | 0.18049 | 13 | 4 | 9  | 0.3846154 | 0.001      | MIR3126  | GFPT1        |   |
| chr2 | +(69745847..69746428) | 581  | 0.325   | 10 | 7 | 3  | 0.4       | 0.008      | NFU1     | AAK1         |   |
| chr2 | +(69834933..69835911) | 978  | 1.21424 | 15 | 8 | 7  | 0.0666667 | 0.00059687 | NFU1     | AAK1         |   |
| chr2 | +(70213194..70213872) | 678  | 4.63887 | 6  | 2 | 4  | 0.3333333 | 0.067      | ASPRV1   | LOC400960    |   |
| chr2 | +(71012336..71012978) | 642  | 0.64523 | 10 | 3 | 7  | 0.4       | 0.058      | ADD2     | FIGLA        |   |
| chr2 | +(71039371..71039889) | 518  | 4.63887 | 6  | 2 | 4  | 0.3333333 | 0.067      | FIGLA    | CLEC4F       |   |
| chr2 | +(71792412..71793025) | 613  | 0.64523 | 10 | 5 | 5  | 0         | 0.00451172 | DYSF     | CYP26B1      | v |
| chr2 | +(71869688..71870189) | 501  | 2.33844 | 7  | 4 | 3  | 0.1428571 | 0.029      | DYSF     | CYP26B1      | v |
| chr2 | +(72109980..72110933) | 953  | 0.325   | 16 | 6 | 10 | 0.25      | 0.00056905 | DYSF     | CYP26B1      | v |
| chr2 | +(72250752..72251820) | 1068 | 4.63887 | 12 | 8 | 4  | 0.3333333 | 0.99671074 | DYSF     | CYP26B1      | v |
| chr2 | +(72361910..72362769) | 859  | 4.63887 | 12 | 7 | 5  | 0.1666667 | 0.00224163 | DYSF     | CYP26B1      | v |

|      |                       |      |         |    |    |    |            |            |            |            |   |
|------|-----------------------|------|---------|----|----|----|------------|------------|------------|------------|---|
| chr2 | +(72370808..72371736) | 928  | 0.64523 | 18 | 9  | 9  | 0          | 0.15493978 | DYSF       | CYP26B1    | v |
| chr2 | +(72410908..72411529) | 621  | 4.63887 | 6  | 4  | 2  | 0.33333333 | 0.067      | CYP26B1    | EXOC6B     | v |
| chr2 | +(72460275..72461331) | 1056 | 1.21424 | 20 | 11 | 9  | 0.1        | 0.45463452 | CYP26B1    | EXOC6B     | v |
| chr2 | +(72808627..72809327) | 700  | 0.18049 | 11 | 6  | 5  | 0.0909091  | 0.00308495 | CYP26B1    | EXOC6B     | v |
| chr2 | +(73312285..73312985) | 700  | 4.63887 | 9  | 6  | 3  | 0.33333333 | 0.988      | SFXN5      | RAB11FIP5  |   |
| chr2 | +(73718320..73719490) | 1170 | 1.21424 | 18 | 9  | 9  | 0          | 0.0015476  | ALMS1      | NAT8       |   |
| chr2 | +(74372150..74372665) | 515  | 2.33844 | 9  | 6  | 3  | 0.33333333 | 0.012      | TET3       | BOLA3      |   |
| chr2 | +(74649929..74650436) | 507  | 4.63887 | 6  | 3  | 3  | 0          | 0.05       | WDR54      | RTKN       |   |
| chr2 | +(74687309..74687842) | 533  | 0.64523 | 13 | 9  | 4  | 0.3846154  | 0.793      | WBP1       | MOGS       |   |
| chr2 | +(74718276..74718780) | 504  | 4.63887 | 10 | 5  | 5  | 0          | 0.02360089 | TTC31      | LBX2       |   |
| chr2 | +(74855288..74855857) | 569  | 0.64523 | 13 | 8  | 5  | 0.2307692  | 0.01405402 | DOK1       | C2orf65    |   |
| chr2 | +(85292138..85292819) | 681  | 4.63887 | 6  | 4  | 2  | 0.33333333 | 0.067      | KCMF1      | TCF7L1     | v |
| chr2 | +(85418425..85419203) | 778  | 0.08723 | 12 | 6  | 6  | 0          | 0.00197388 | TCF7L1     | TGOLN2     | v |
| chr2 | +(85482359..85483059) | 700  | 1.21424 | 10 | 3  | 7  | 0.4        | 0.008      | TCF7L1     | TGOLN2     | v |
| chr2 | +(85604122..85604822) | 700  | 0.325   | 10 | 6  | 4  | 0.2        | 0.005      | ELMOD3     | CAPG       |   |
| chr2 | +(85613659..85614359) | 700  | 0.64523 | 10 | 3  | 7  | 0.4        | 0.258      | ELMOD3     | CAPG       |   |
| chr2 | +(85661815..85662345) | 530  | 4.63887 | 10 | 5  | 5  | 0          | 0.03790009 | CAPG       | SH2D6      |   |
| chr2 | +(85672656..85673356) | 700  | 0.64523 | 10 | 4  | 6  | 0.2        | 0.005      | SH2D6      | MAT2A      |   |
| chr2 | +(85702692..85703392) | 700  | 2.33844 | 9  | 3  | 6  | 0.33333333 | 0.012      | SH2D6      | MAT2A      |   |
| chr2 | +(86278427..86279098) | 671  | 2.33844 | 10 | 3  | 7  | 0.4        | 0.008      | LOC90784   | POLR1A     |   |
| chr2 | +(86683535..86684049) | 514  | 4.63887 | 12 | 6  | 6  | 0          | 0.05465729 | KDM3A      | VPS24      |   |
| chr2 | +(86704854..86705374) | 520  | 4.63887 | 10 | 7  | 3  | 0.4        | 0.008      | KDM3A      | VPS24      |   |
| chr2 | +(88485921..88487057) | 1136 | 1.21424 | 16 | 8  | 8  | 0          | 0.99961123 | THNSL2     | FOXI3      |   |
| chr2 | +(89055609..89056143) | 534  | 1.21424 | 8  | 5  | 3  | 0.25       | 0.018      | RPIA       | ANKRD36BP2 |   |
| chr2 | +(89103789..89104378) | 589  | 2.44321 | 42 | 28 | 14 | 0.33333333 | 7.5688E-05 | ANKRD36BP2 | LOC654342  |   |
| chr2 | +(89148963..89149608) | 645  | 4.63887 | 6  | 4  | 2  | 0.33333333 | 0.067      | ANKRD36BP2 | LOC654342  |   |
| chr2 | +(89416855..89417434) | 579  | 1.21424 | 16 | 10 | 6  | 0.25       | 0.74240941 | ANKRD36BP2 | LOC654342  |   |
| chr2 | +(89512605..89513107) | 502  | 4.63887 | 13 | 8  | 5  | 0.2307692  | 0.38484897 | ANKRD36BP2 | LOC654342  |   |
| chr2 | +(89533676..89534249) | 573  | 1.21424 | 16 | 10 | 6  | 0.25       | 0.58586873 | ANKRD36BP2 | LOC654342  |   |
| chr2 | +(90160265..90160878) | 613  | 4.63887 | 8  | 3  | 5  | 0.25       | 0.018      | ANKRD36BP2 | LOC654342  |   |
| chr2 | +(91760286..91760985) | 699  | 1.21424 | 12 | 8  | 4  | 0.33333333 | 0.99671074 | ANKRD36BP2 | LOC654342  |   |
| chr2 | +(91762913..91763477) | 564  | 2.33844 | 12 | 4  | 8  | 0.33333333 | 0.923      | ANKRD36BP2 | LOC654342  |   |
| chr2 | +(91766199..91767131) | 932  | 1.56697 | 44 | 25 | 19 | 0.1363636  | 2.1111E-07 | ANKRD36BP2 | LOC654342  |   |
| chr2 | +(91778390..91778943) | 553  | 1.21424 | 8  | 4  | 4  | 0          | 0.014      | ANKRD36BP2 | LOC654342  |   |

|      |                         |      |         |    |    |    |           |            |            |           |
|------|-------------------------|------|---------|----|----|----|-----------|------------|------------|-----------|
| chr2 | +(91801078..91801778)   | 700  | 4.63887 | 9  | 6  | 3  | 0.3333333 | 0.988      | ANKRD36BP2 | LOC654342 |
| chr2 | +(91806491..91807247)   | 756  | 1.21424 | 14 | 6  | 8  | 0.1428571 | 0.00097289 | ANKRD36BP2 | LOC654342 |
| chr2 | +(91808791..91809326)   | 535  | 4.63887 | 11 | 5  | 6  | 0.0909091 | 0.29194121 | ANKRD36BP2 | LOC654342 |
| chr2 | +(95501392..95501902)   | 510  | 4.63887 | 10 | 4  | 6  | 0.2       | 0.005      | ACTR3BP2   | ANKRD20B  |
| chr2 | +(95522274..95523067)   | 793  | 0.00027 | 33 | 19 | 14 | 0.1515152 | 2.6355E-05 | ACTR3BP2   | ANKRD20B  |
| chr2 | +(95965244..95965789)   | 545  | 2.33844 | 7  | 4  | 3  | 0.1428571 | 0.029      | KCNIP3     | FAHD2A    |
| chr2 | +(95997252..95997786)   | 534  | 2.33844 | 7  | 3  | 4  | 0.1428571 | 0.029      | KCNIP3     | FAHD2A    |
| chr2 | +(96520822..96521335)   | 513  | 4.63887 | 10 | 5  | 5  | 0         | 0.23235105 | TRIM43     | LOC729234 |
| chr2 | +(96521481..96522004)   | 523  | 0.41287 | 23 | 14 | 9  | 0.2173913 | 0.00052702 | TRIM43     | LOC729234 |
| chr2 | +(96686626..96687137)   | 511  | 4.63887 | 8  | 5  | 3  | 0.25      | 0.036      | LOC729234  | GPAT2     |
| chr2 | +(96829038..96829853)   | 815  | 4.63887 | 12 | 6  | 6  | 0         | 0.00197388 | DUSP2      | STARD7    |
| chr2 | +(96860916..96861608)   | 692  | 0.325   | 13 | 8  | 5  | 0.2307692 | 0.02021199 | DUSP2      | STARD7    |
| chr2 | +(96943798..96944309)   | 511  | 4.63887 | 12 | 5  | 7  | 0.1666667 | 0.11161257 | CIAO1      | SNRNP200  |
| chr2 | +(97267902..97268411)   | 509  | 4.63887 | 9  | 6  | 3  | 0.3333333 | 0.726      | ARID5A     | KIAA1310  |
| chr2 | +(97545633..97546901)   | 1268 | 1.21424 | 14 | 6  | 8  | 0.1428571 | 0.00097289 | SEMA4C     | FAM178B   |
| chr2 | +(97616681..97617207)   | 526  | 0.64523 | 12 | 4  | 8  | 0.3333333 | 0.00328926 | SEMA4C     | FAM178B   |
| chr2 | +(97711725..97712280)   | 555  | 1.56697 | 26 | 9  | 17 | 0.3076923 | 0.00116275 | FAM178B    | FAHD2B    |
| chr2 | +(97877457..97877960)   | 503  | 4.63887 | 11 | 6  | 5  | 0.0909091 | 0.18065522 | ANKRD36    | ANKRD36B  |
| chr2 | +(97883050..97883560)   | 510  | 4.63887 | 10 | 5  | 5  | 0         | 0.05859256 | ANKRD36    | ANKRD36B  |
| chr2 | +(98041753..98042280)   | 527  | 4.63887 | 9  | 3  | 6  | 0.3333333 | 0.19       | ANKRD36    | ANKRD36B  |
| chr2 | +(98139722..98140250)   | 528  | 1.21424 | 11 | 7  | 4  | 0.2727273 | 0.115      | ANKRD36    | ANKRD36B  |
| chr2 | +(98169681..98170210)   | 529  | 2.33844 | 14 | 7  | 7  | 0         | 0.07085998 | ANKRD36    | ANKRD36B  |
| chr2 | +(99012201..99012716)   | 515  | 4.63887 | 7  | 3  | 4  | 0.1428571 | 0.029      | CNGA3      | INPP4A    |
| chr2 | +(99187584..99188474)   | 890  | 0.03019 | 14 | 8  | 6  | 0.1428571 | 0.00097289 | INPP4A     | C2orf64   |
| chr2 | +(99274267..99275150)   | 883  | 1.21424 | 14 | 5  | 9  | 0.2857143 | 0.0013499  | UNC50      | MGAT4A    |
| chr2 | +(99499651..99500351)   | 700  | 0.04989 | 15 | 5  | 10 | 0.3333333 | 0.00109982 | MGAT4A     | C2orf55   |
| chr2 | +(99634619..99635266)   | 647  | 4.63887 | 10 | 6  | 4  | 0.2       | 0.033      | C2orf55    | TSGA10    |
| chr2 | +(100081081..100081646) | 565  | 4.63887 | 9  | 4  | 5  | 0.1111111 | 0.008      | EIF5B      | REV1      |
| chr2 | +(100486528..100487560) | 1032 | 2.33844 | 13 | 9  | 4  | 0.3846154 | 0.926      | REV1       | AFF3      |
| chr2 | +(100759824..100760802) | 978  | 2.33844 | 13 | 7  | 6  | 0.0769231 | 0.0013499  | AFF3       | LONRF2    |
| chr2 | +(100763661..100764361) | 700  | 0.08723 | 12 | 4  | 8  | 0.3333333 | 0.00328926 | AFF3       | LONRF2    |
| chr2 | +(101182797..101183318) | 521  | 4.63887 | 8  | 4  | 4  | 0         | 0.057      | PDCL3      | NPAS2     |
| chr2 | +(101437462..101437977) | 515  | 4.63887 | 9  | 6  | 3  | 0.3333333 | 0.083      | NPAS2      | RPL31     |
| chr2 | +(102644083..102645068) | 985  | 1.21424 | 15 | 7  | 8  | 0.0666667 | 0.00059687 | IL1R2      | IL1R1     |

|      |                         |      |         |    |    |    |           |            |                   |                   |
|------|-------------------------|------|---------|----|----|----|-----------|------------|-------------------|-------------------|
| chr2 | +(105709640..105710555) | 915  | 0.64523 | 18 | 7  | 11 | 0.2222222 | 0.00047372 | MRPS9             | GPR45             |
| chr2 | +(106987283..106987816) | 533  | 4.63887 | 8  | 5  | 3  | 0.25      | 0.071      | UXS1              | PLGLA             |
| chr2 | +(107004083..107004585) | 502  | 4.63887 | 11 | 6  | 5  | 0.0909091 | 0.07206352 | PLGLA             | RGPD3             |
| chr2 | +(107032076..107032578) | 502  | 2.90131 | 23 | 12 | 11 | 0.0434783 | 0.00011092 | PLGLA             | RGPD3             |
| chr2 | +(107073022..107073987) | 965  | 0.325   | 27 | 13 | 14 | 0.037037  | 4.2364E-05 | PLGLA             | RGPD3             |
| chr2 | +(107093739..107094288) | 549  | 4.63887 | 6  | 3  | 3  | 0         | 0.05       | RGPD3             | ST6GAL2           |
| chr2 | +(107197062..107197702) | 640  | 0.64523 | 9  | 5  | 4  | 0.1111111 | 0.008      | RGPD3             | ST6GAL2           |
| chr2 | +(108475235..108475752) | 517  | 0.325   | 21 | 11 | 10 | 0.047619  | 0.00059928 | RGPD4             | SLC5A7            |
| chr2 | +(108477066..108477716) | 650  | 2.90131 | 39 | 27 | 12 | 0.3846154 | 1.3393E-05 | RGPD4             | SLC5A7            |
| chr2 | +(108486873..108487560) | 687  | 0.37718 | 42 | 13 | 29 | 0.3809524 | 2.5917E-06 | RGPD4             | SLC5A7            |
| chr2 | +(108488951..108489467) | 516  | 4.63887 | 6  | 4  | 2  | 0.3333333 | 0.067      | RGPD4             | SLC5A7            |
| chr2 | +(109102055..109102638) | 583  | 0.325   | 17 | 10 | 7  | 0.1764706 | 0.02021199 | GCC2              | LIMS1             |
| chr2 | +(109113085..109113598) | 513  | 2.33844 | 12 | 5  | 7  | 0.1666667 | 0.03090926 | GCC2              | LIMS1             |
| chr2 | +(109275989..109276535) | 546  | 2.33844 | 9  | 6  | 3  | 0.3333333 | 0.012      | LIMS1             | RANBP2            |
| chr2 | +(109347652..109348209) | 557  | 0.00954 | 28 | 11 | 17 | 0.2142857 | 6.7686E-06 | RANBP2            | CCDC138           |
| chr2 | +(109365153..109365688) | 535  | 1.56697 | 41 | 23 | 18 | 0.1219512 | 1.5058E-07 | RANBP2            | CCDC138           |
| chr2 | +(109367375..109368281) | 906  | 0.24703 | 69 | 34 | 35 | 0.0144928 | 0.00239696 | RANBP2            | CCDC138           |
| chr2 | +(109369155..109369731) | 576  | 2.44321 | 51 | 23 | 28 | 0.0980392 | 7.7726E-10 | RANBP2            | CCDC138           |
| chr2 | +(109370064..109370573) | 509  | 4.6845  | 47 | 16 | 31 | 0.3191489 | 0.00021194 | RANBP2            | CCDC138           |
| chr2 | +(109371421..109372174) | 753  | 0.08723 | 30 | 16 | 14 | 0.0666667 | 0.01111601 | RANBP2            | CCDC138           |
| chr2 | +(109388852..109389364) | 512  | 4.63887 | 8  | 5  | 3  | 0.25      | 0.196      | RANBP2            | CCDC138           |
| chr2 | +(109900163..109900863) | 700  | 2.33844 | 12 | 6  | 6  | 0         | 0.97266803 | MIR4265           | MIR4266           |
| chr2 | +(110068597..110069874) | 1277 | 0.325   | 17 | 10 | 7  | 0.1764706 | 0.00031815 | MIR4266           | 41162             |
| chr2 | +(110604957..110606021) | 1064 | 0.08723 | 38 | 15 | 23 | 0.2105263 | 0.06202446 | RGPD6_dup1        | LIMS3_dup1        |
| chr2 | +(110663093..110663628) | 535  | 1.21424 | 16 | 10 | 6  | 0.25      | 0.00056905 | LIMS3-LOC440895_d | LOC100288570_dup1 |
| chr2 | +(111281000..111281560) | 560  | 1.15269 | 36 | 20 | 16 | 0.1111111 | 4.7264E-07 | LIMS3_dup2        | RGPD6_dup2        |
| chr2 | +(112252194..112252736) | 542  | 4.63887 | 11 | 7  | 4  | 0.2727273 | 0.206      | BCL2L11           | LOC541471         |
| chr2 | +(112416926..112417549) | 623  | 0.08723 | 12 | 5  | 7  | 0.1666667 | 0.00224163 | LOC541471         | ANAPC1            |
| chr2 | +(112545441..112546326) | 885  | 0.325   | 19 | 11 | 8  | 0.1578947 | 0.00013997 | LOC541471         | ANAPC1            |
| chr2 | +(112549978..112550482) | 504  | 1.21424 | 12 | 8  | 4  | 0.3333333 | 0.99671074 | LOC541471         | ANAPC1            |
| chr2 | +(112607978..112608481) | 503  | 4.63887 | 10 | 4  | 6  | 0.2       | 0.695      | LOC541471         | ANAPC1            |
| chr2 | +(112777907..112778513) | 606  | 4.63887 | 10 | 4  | 6  | 0.2       | 0.129      | MERTK             | TMEM87B           |
| chr2 | +(112824361..112824864) | 503  | 4.63887 | 6  | 4  | 2  | 0.3333333 | 0.067      | TMEM87B           | FBLN7             |
| chr2 | +(112897719..112898239) | 520  | 2.33844 | 7  | 3  | 4  | 0.1428571 | 0.029      | FBLN7             | ZC3H8             |

|      |                         |     |         |    |    |    |           |            |           |              |
|------|-------------------------|-----|---------|----|----|----|-----------|------------|-----------|--------------|
| chr2 | +(113057317..113057951) | 634 | 4.63887 | 11 | 6  | 5  | 0.0909091 | 0.13666084 | ZC3H6     | RGPD8        |
| chr2 | +(113145406..113145923) | 517 | 2.33844 | 11 | 4  | 7  | 0.2727273 | 0.003      | ZC3H6     | RGPD8        |
| chr2 | +(113146361..113146958) | 597 | 1.34515 | 26 | 11 | 15 | 0.1538462 | 0.00040765 | ZC3H6     | RGPD8        |
| chr2 | +(113155581..113156085) | 504 | 4.63887 | 23 | 7  | 16 | 0.3913043 | 0.98083343 | ZC3H6     | RGPD8        |
| chr2 | +(113156373..113157351) | 978 | 0.17743 | 66 | 36 | 30 | 0.0909091 | 2.3569E-05 | ZC3H6     | RGPD8        |
| chr2 | +(113159271..113159773) | 502 | 4.6845  | 58 | 33 | 25 | 0.137931  | 9.6996E-08 | ZC3H6     | RGPD8        |
| chr2 | +(113163500..113164005) | 505 | 3.30444 | 55 | 35 | 20 | 0.2727273 | 0.00130894 | ZC3H6     | RGPD8        |
| chr2 | +(113258439..113259126) | 687 | 1.21424 | 16 | 6  | 10 | 0.25      | 0.00056905 | TTL       | POLR1B       |
| chr2 | +(113959554..113960185) | 631 | 2.33844 | 7  | 3  | 4  | 0.1428571 | 0.029      | IL1RN     | LOC440839    |
| chr2 | +(114709121..114709626) | 505 | 4.63887 | 10 | 6  | 4  | 0.2       | 0.129      | ACTR3     | LOC100499194 |
| chr2 | +(119739711..119740213) | 502 | 1.21424 | 11 | 4  | 7  | 0.2727273 | 0.115      | MARCO     | C1QL2        |
| chr2 | +(119777491..119778042) | 551 | 4.63887 | 6  | 2  | 4  | 0.3333333 | 0.067      | MARCO     | C1QL2        |
| chr2 | +(120903596..120904135) | 539 | 0.08723 | 12 | 7  | 5  | 0.1666667 | 0.00224163 | EPB41L5   | TMEM185B     |
| chr2 | +(121319817..121320517) | 700 | 0.64523 | 10 | 7  | 3  | 0.4       | 0.008      | LOC84931  | GLI2         |
| chr2 | +(121673823..121674523) | 700 | 0.08723 | 13 | 5  | 8  | 0.2307692 | 0.01405402 | GLI2      | TFCP2L1      |
| chr2 | +(121710263..121710793) | 530 | 1.21424 | 12 | 5  | 7  | 0.1666667 | 0.00224163 | GLI2      | TFCP2L1      |
| chr2 | +(121713191..121713805) | 614 | 1.21424 | 8  | 5  | 3  | 0.25      | 0.018      | GLI2      | TFCP2L1      |
| chr2 | +(121722902..121723583) | 681 | 4.63887 | 7  | 3  | 4  | 0.1428571 | 0.029      | GLI2      | TFCP2L1      |
| chr2 | +(121728048..121728748) | 700 | 0.18049 | 12 | 7  | 5  | 0.1666667 | 0.00224163 | GLI2      | TFCP2L1      |
| chr2 | +(121741358..121742058) | 700 | 2.33844 | 10 | 3  | 7  | 0.4       | 0.992      | GLI2      | TFCP2L1      |
| chr2 | +(121789191..121789995) | 804 | 0.03019 | 26 | 14 | 12 | 0.0769231 | 7.784E-06  | GLI2      | TFCP2L1      |
| chr2 | +(121957854..121958786) | 932 | 2.33844 | 14 | 7  | 7  | 0         | 0.00087256 | GLI2      | TFCP2L1      |
| chr2 | +(127555539..127556239) | 700 | 0.08723 | 12 | 4  | 8  | 0.3333333 | 0.00328926 | GYPC      | BIN1         |
| chr2 | +(127580364..127581062) | 698 | 2.33844 | 11 | 7  | 4  | 0.2727273 | 0.997      | GYPC      | BIN1         |
| chr2 | +(127812462..127813162) | 700 | 4.63887 | 11 | 6  | 5  | 0.0909091 | 0.00308495 | GYPC      | BIN1         |
| chr2 | +(128323142..128323841) | 699 | 0.325   | 10 | 6  | 4  | 0.2       | 0.005      | MYO7B     | LIMS2        |
| chr2 | +(128396869..128397569) | 700 | 0.64523 | 9  | 3  | 6  | 0.3333333 | 0.012      | MYO7B     | LIMS2        |
| chr2 | +(128944862..128945380) | 518 | 4.63887 | 7  | 3  | 4  | 0.1428571 | 0.057      | UGGT1     | HS6ST1       |
| chr2 | +(128982851..128983657) | 806 | 0.00954 | 16 | 9  | 7  | 0.125     | 0.00042755 | UGGT1     | HS6ST1       |
| chr2 | +(130899715..130900218) | 503 | 4.63887 | 6  | 4  | 2  | 0.3333333 | 0.067      | LOC285103 | CCDC74B      |
| chr2 | +(131116233..131116933) | 700 | 1.21424 | 9  | 5  | 4  | 0.1111111 | 0.008      | PTPN18    | CFC1B_dup1   |
| chr2 | +(131139784..131140471) | 687 | 0.325   | 10 | 6  | 4  | 0.2       | 0.005      | PTPN18    | CFC1B_dup1   |
| chr2 | +(131232119..131232635) | 516 | 3.61997 | 67 | 33 | 34 | 0.0149254 | 0.00147804 | PTPN18    | CFC1B_dup1   |
| chr2 | +(131888318..131888957) | 639 | 4.63887 | 8  | 4  | 4  | 0         | 0.014      | PLEKHB2   | POTEE        |

|      |                         |      |         |    |    |    |           |            |          |            |
|------|-------------------------|------|---------|----|----|----|-----------|------------|----------|------------|
| chr2 | +(132020923..132021855) | 932  | 0.54048 | 36 | 18 | 18 | 0         | 0.000155   | POTEE    | LOC440910  |
| chr2 | +(132239965..132240647) | 682  | 0.64523 | 15 | 10 | 5  | 0.3333333 | 0.00998223 | TUBA3D   | MZT2A      |
| chr2 | +(132285554..132286239) | 685  | 1.21424 | 9  | 6  | 3  | 0.3333333 | 0.012      | CCDC74A  | POTEKP     |
| chr2 | +(132366484..132367064) | 580  | 4.63887 | 9  | 3  | 6  | 0.3333333 | 0.274      | POTEKP   | C2orf27A   |
| chr2 | +(132369060..132369585) | 525  | 2.38223 | 33 | 16 | 17 | 0.030303  | 0.00031072 | POTEKP   | C2orf27A   |
| chr2 | +(132911985..132912499) | 514  | 0.64523 | 22 | 15 | 7  | 0.3636364 | 0.00010748 | C2orf27B | ANKRD30BL  |
| chr2 | +(133010541..133011060) | 519  | 4.63887 | 6  | 2  | 4  | 0.3333333 | 0.067      | C2orf27B | ANKRD30BL  |
| chr2 | +(133011569..133012142) | 573  | 0.64523 | 25 | 16 | 9  | 0.28      | 2.2889E-05 | C2orf27B | ANKRD30BL  |
| chr2 | +(133540133..133540775) | 642  | 2.33844 | 10 | 4  | 6  | 0.2       | 0.086      | LYPD1    | NCKAP5     |
| chr2 | +(134525632..134526753) | 1121 | 2.33844 | 13 | 7  | 6  | 0.0769231 | 0.98393771 | NCKAP5   | MIR3679    |
| chr2 | +(136028828..136029390) | 562  | 4.63887 | 10 | 7  | 3  | 0.4       | 0.667      | RAB3GAP1 | ZRANB3     |
| chr2 | +(136268944..136269462) | 518  | 4.63887 | 10 | 4  | 6  | 0.2       | 0.457      | RAB3GAP1 | ZRANB3     |
| chr2 | +(136398809..136399325) | 516  | 2.33844 | 10 | 3  | 7  | 0.4       | 0.092      | R3HDM1   | MIR128-1   |
| chr2 | +(136594072..136594581) | 509  | 4.63887 | 11 | 5  | 6  | 0.0909091 | 0.64249967 | UBXN4    | LCT        |
| chr2 | +(138738694..138739198) | 504  | 4.63887 | 8  | 3  | 5  | 0.25      | 0.018      | HNMT     | SPOPL      |
| chr2 | +(152396706..152397385) | 679  | 1.21424 | 10 | 7  | 3  | 0.4       | 0.133      | RIF1     | NEB        |
| chr2 | +(152459837..152460387) | 550  | 0.64523 | 14 | 8  | 6  | 0.1428571 | 0.00225435 | RIF1     | NEB        |
| chr2 | +(152541204..152541731) | 527  | 1.21424 | 10 | 5  | 5  | 0         | 0.00451172 | RIF1     | NEB        |
| chr2 | +(152552770..152553296) | 526  | 4.63887 | 9  | 3  | 6  | 0.3333333 | 0.357      | RIF1     | NEB        |
| chr2 | +(153526588..153527122) | 534  | 1.21424 | 11 | 5  | 6  | 0.0909091 | 0.29194121 | FMNL2    | PRPF40A    |
| chr2 | +(153537364..153537880) | 516  | 2.33844 | 10 | 3  | 7  | 0.4       | 0.092      | FMNL2    | PRPF40A    |
| chr2 | +(159530107..159530626) | 519  | 4.63887 | 11 | 4  | 7  | 0.2727273 | 0.206      | PKP4     | DAPL1      |
| chr2 | +(159572169..159572757) | 588  | 4.63887 | 6  | 4  | 2  | 0.3333333 | 0.067      | PKP4     | DAPL1      |
| chr2 | +(160257135..160257650) | 515  | 2.33844 | 12 | 7  | 5  | 0.1666667 | 0.01417552 | WDSUB1   | BAZ2B      |
| chr2 | +(160709668..160710197) | 529  | 0.325   | 16 | 7  | 9  | 0.125     | 0.00062229 | CD302    | LY75-CD302 |
| chr2 | +(160713670..160715020) | 1350 | 2.33844 | 13 | 7  | 6  | 0.0769231 | 0.0013499  | CD302    | LY75-CD302 |
| chr2 | +(160734828..160735348) | 520  | 4.63887 | 8  | 5  | 3  | 0.25      | 0.125      | CD302    | LY75-CD302 |
| chr2 | +(162059856..162060407) | 551  | 4.63887 | 9  | 3  | 6  | 0.3333333 | 0.19       | TANK     | PSMD14     |
| chr2 | +(162060922..162061437) | 515  | 4.63887 | 10 | 4  | 6  | 0.2       | 0.057      | TANK     | PSMD14     |
| chr2 | +(162357279..162358002) | 723  | 0.02589 | 39 | 17 | 22 | 0.1282051 | 9.4871E-06 | TBR1     | SLC4A10    |
| chr2 | +(162361611..162362245) | 634  | 0.08723 | 23 | 10 | 13 | 0.1304348 | 0.59795967 | TBR1     | SLC4A10    |
| chr2 | +(162362428..162362982) | 554  | 0.325   | 24 | 11 | 13 | 0.0833333 | 0.74738082 | TBR1     | SLC4A10    |
| chr2 | +(162834016..162834647) | 631  | 0.02619 | 21 | 7  | 14 | 0.3333333 | 0.00012828 | SLC4A10  | DPP4       |
| chr2 | +(163039559..163040259) | 700  | 2.33844 | 11 | 4  | 7  | 0.2727273 | 0.003      | GCG      | FAP        |

|      |                         |      |         |    |    |    |           |            |          |          |
|------|-------------------------|------|---------|----|----|----|-----------|------------|----------|----------|
| chr2 | +(163082901..163083588) | 687  | 0.325   | 14 | 5  | 9  | 0.2857143 | 0.00466119 | GCG      | FAP      |
| chr2 | +(165971797..165972304) | 507  | 4.63887 | 9  | 5  | 4  | 0.1111111 | 0.008      | SLC38A11 | SCN3A    |
| chr2 | +(166768913..166769565) | 652  | 1.21424 | 16 | 5  | 11 | 0.375     | 0.0009184  | GALNT3   | TTC21B   |
| chr2 | +(166848405..166848913) | 508  | 4.63887 | 8  | 4  | 4  | 0         | 0.343      | TTC21B   | SCN1A    |
| chr2 | +(167133407..167133986) | 579  | 0.325   | 15 | 8  | 7  | 0.0666667 | 0.01031878 | SCN1A    | SCN9A    |
| chr2 | +(167262451..167262962) | 511  | 2.33844 | 9  | 4  | 5  | 0.1111111 | 0.095      | SCN9A    | SCN7A    |
| chr2 | +(167321950..167322475) | 525  | 4.63887 | 12 | 5  | 7  | 0.1666667 | 0.06144014 | SCN9A    | SCN7A    |
| chr2 | +(168023289..168024519) | 1230 | 0.08723 | 21 | 12 | 9  | 0.1428571 | 6.2118E-05 | XIRP2    | B3GALT1  |
| chr2 | +(168104137..168104662) | 525  | 4.63887 | 8  | 4  | 4  | 0         | 0.1        | XIRP2    | B3GALT1  |
| chr2 | +(168570896..168571791) | 895  | 0.325   | 33 | 13 | 20 | 0.2121212 | 0.15992096 | XIRP2    | B3GALT1  |
| chr2 | +(169873142..169873717) | 575  | 2.33844 | 17 | 7  | 10 | 0.1764706 | 0.21748358 | G6PC2    | ABCB11   |
| chr2 | +(170028175..170028827) | 652  | 2.33844 | 7  | 4  | 3  | 0.1428571 | 0.029      | DHRS9    | LRP2     |
| chr2 | +(170034209..170034735) | 526  | 0.325   | 12 | 8  | 4  | 0.3333333 | 0.99671074 | DHRS9    | LRP2     |
| chr2 | +(170070006..170070520) | 514  | 4.63887 | 10 | 4  | 6  | 0.2       | 0.381      | DHRS9    | LRP2     |
| chr2 | +(170133987..170134671) | 684  | 0.64523 | 10 | 4  | 6  | 0.2       | 0.01       | DHRS9    | LRP2     |
| chr2 | +(170353995..170354683) | 688  | 0.64523 | 12 | 6  | 6  | 0         | 0.02733197 | BBS5     | KBTBD10  |
| chr2 | +(170402208..170403272) | 1064 | 0.04989 | 20 | 13 | 7  | 0.3       | 0.0002107  | KBTBD10  | FASTKD1  |
| chr2 | +(170671621..170672169) | 548  | 2.33844 | 12 | 5  | 7  | 0.1666667 | 0.00591469 | SSB      | METTL5   |
| chr2 | +(171702168..171702687) | 519  | 4.63887 | 12 | 8  | 4  | 0.3333333 | 0.341      | GAD1     | GORASP2  |
| chr2 | +(171911357..171912006) | 649  | 1.21424 | 8  | 3  | 5  | 0.25      | 0.018      | GORASP2  | TLK1     |
| chr2 | +(171939143..171939657) | 514  | 4.63887 | 6  | 3  | 3  | 0         | 0.05       | GORASP2  | TLK1     |
| chr2 | +(172304988..172305528) | 540  | 4.63887 | 7  | 3  | 4  | 0.1428571 | 0.029      | DCAF17   | CYBRD1   |
| chr2 | +(173338654..173339191) | 537  | 4.63887 | 6  | 2  | 4  | 0.3333333 | 0.067      | ITGA6    | PDK1     |
| chr2 | +(173429499..173430067) | 568  | 0.325   | 14 | 9  | 5  | 0.2857143 | 0.03593032 | PDK1     | LOC91149 |
| chr2 | +(173656571..173657416) | 845  | 0.03019 | 14 | 7  | 7  | 0         | 0.00087256 | RAPGEF4  | ZAK      |
| chr2 | +(173908201..173908709) | 508  | 2.33844 | 10 | 3  | 7  | 0.4       | 0.992      | RAPGEF4  | ZAK      |
| chr2 | +(175093640..175094164) | 524  | 4.63887 | 9  | 3  | 6  | 0.3333333 | 0.024      | SP3      | OLA1     |
| chr2 | +(177486962..177487622) | 660  | 0.64523 | 9  | 4  | 5  | 0.1111111 | 0.008      | MIR1246  | HNRNPA3  |
| chr2 | +(177860441..177861597) | 1156 | 2.33844 | 13 | 6  | 7  | 0.0769231 | 0.0013499  | MIR1246  | HNRNPA3  |
| chr2 | +(177995501..177996051) | 550  | 4.63887 | 10 | 5  | 5  | 0         | 0.00451172 | MIR1246  | HNRNPA3  |
| chr2 | +(178081110..178081625) | 515  | 1.9017  | 21 | 7  | 14 | 0.3333333 | 0.02620672 | HNRNPA3  | NFE2L2   |
| chr2 | +(178082233..178082758) | 525  | 2.33844 | 11 | 7  | 4  | 0.2727273 | 0.006      | HNRNPA3  | NFE2L2   |
| chr2 | +(178096508..178097135) | 627  | 2.33844 | 11 | 7  | 4  | 0.2727273 | 0.206      | HNRNPA3  | NFE2L2   |
| chr2 | +(178481496..178482033) | 537  | 1.9017  | 22 | 12 | 10 | 0.0909091 | 0.00880376 | TTC30B   | TTC30A   |



|      |                         |     |         |    |    |    |           |            |          |         |
|------|-------------------------|-----|---------|----|----|----|-----------|------------|----------|---------|
| chr2 | +(179395161..179395802) | 641 | 0.325   | 16 | 7  | 9  | 0.125     | 0.07650334 | PLEKHA3  | TTN     |
| chr2 | +(179427181..179427685) | 504 | 4.63887 | 11 | 6  | 5  | 0.0909091 | 0.07206352 | PLEKHA3  | TTN     |
| chr2 | +(179432909..179433512) | 603 | 2.33844 | 11 | 4  | 7  | 0.2727273 | 0.394      | PLEKHA3  | TTN     |
| chr2 | +(179514154..179514812) | 658 | 1.21424 | 9  | 6  | 3  | 0.3333333 | 0.024      | PLEKHA3  | TTN     |
| chr2 | +(179516283..179516797) | 514 | 4.63887 | 9  | 5  | 4  | 0.1111111 | 0.365      | PLEKHA3  | TTN     |
| chr2 | +(179527970..179528564) | 594 | 0.0149  | 31 | 15 | 16 | 0.0322581 | 0.27661498 | PLEKHA3  | TTN     |
| chr2 | +(179554105..179554712) | 607 | 4.63887 | 9  | 6  | 3  | 0.3333333 | 0.048      | PLEKHA3  | TTN     |
| chr2 | +(179560494..179561018) | 524 | 2.33844 | 9  | 4  | 5  | 0.1111111 | 0.095      | PLEKHA3  | TTN     |
| chr2 | +(179565791..179566301) | 510 | 4.63887 | 8  | 5  | 3  | 0.25      | 0.018      | PLEKHA3  | TTN     |
| chr2 | +(179701832..179702359) | 527 | 4.63887 | 7  | 4  | 3  | 0.1428571 | 0.2        | TTN      | CCDC141 |
| chr2 | +(182275445..182276145) | 700 | 0.00954 | 16 | 10 | 6  | 0.25      | 0.00056905 | UBE2E3   | ITGA4   |
| chr2 | +(182360059..182360577) | 518 | 4.63887 | 11 | 6  | 5  | 0.0909091 | 0.10062131 | ITGA4    | CERKL   |
| chr2 | +(182763541..182764102) | 561 | 2.33844 | 11 | 7  | 4  | 0.2727273 | 0.394      | SSFA2    | PPP1R1C |
| chr2 | +(182775200..182775765) | 565 | 4.63887 | 10 | 6  | 4  | 0.2       | 0.057      | SSFA2    | PPP1R1C |
| chr2 | +(185803402..185804004) | 602 | 4.63887 | 11 | 7  | 4  | 0.2727273 | 0.082      | ZNF804A  | FSIP2   |
| chr2 | +(187370032..187370573) | 541 | 4.63887 | 9  | 3  | 6  | 0.3333333 | 0.452      | ZC3H15   | ITGAV   |
| chr2 | +(187486938..187487452) | 514 | 4.63887 | 6  | 2  | 4  | 0.3333333 | 0.067      | ITGAV    | FAM171B |
| chr2 | +(188216771..188217387) | 616 | 2.33844 | 9  | 5  | 4  | 0.1111111 | 0.143      | ZSWIM2   | CALCRL  |
| chr2 | +(188267367..188268083) | 716 | 0.04989 | 13 | 7  | 6  | 0.0769231 | 0.0013499  | ZSWIM2   | CALCRL  |
| chr2 | +(190531054..190531707) | 653 | 4.63887 | 10 | 7  | 3  | 0.4       | 0.983      | ASNSD1   | ANKAR   |
| chr2 | +(192280920..192281459) | 539 | 4.63887 | 11 | 6  | 5  | 0.0909091 | 0.35750033 | MYO1B    | OBFC2A  |
| chr2 | +(192546558..192547123) | 565 | 4.63887 | 9  | 6  | 3  | 0.3333333 | 0.012      | OBFC2A   | SDPR    |
| chr2 | +(196681490..196682022) | 532 | 4.63887 | 11 | 6  | 5  | 0.0909091 | 0.05017413 | SLC39A10 | DNAH7   |
| chr2 | +(197729504..197730019) | 515 | 0.64523 | 10 | 3  | 7  | 0.4       | 0.008      | C2orf66  | PGAP1   |
| chr2 | +(198269388..198270107) | 719 | 1.21424 | 13 | 5  | 8  | 0.2307692 | 0.00420773 | ANKRD44  | SF3B1   |
| chr2 | +(198404694..198405226) | 532 | 2.33844 | 14 | 9  | 5  | 0.2857143 | 0.10263725 | MOBKL3   | RFTN2   |
| chr2 | +(198646314..198646833) | 519 | 4.63887 | 10 | 4  | 6  | 0.2       | 0.057      | MARS2    | BOLL    |
| chr2 | +(198649868..198650422) | 554 | 4.63887 | 6  | 3  | 3  | 0         | 0.05       | MARS2    | BOLL    |
| chr2 | +(198931283..198931983) | 700 | 0.64523 | 13 | 4  | 9  | 0.3846154 | 0.999      | PLCL1    | SATB2   |
| chr2 | +(198950583..198951088) | 505 | 4.63887 | 10 | 4  | 6  | 0.2       | 0.129      | PLCL1    | SATB2   |
| chr2 | +(200063779..200064449) | 670 | 2.33844 | 7  | 4  | 3  | 0.1428571 | 0.029      | PLCL1    | SATB2   |
| chr2 | +(200820045..200820591) | 546 | 2.33844 | 7  | 3  | 4  | 0.1428571 | 0.029      | C2orf69  | C2orf60 |
| chr2 | +(201488405..201489060) | 655 | 1.21424 | 9  | 6  | 3  | 0.3333333 | 0.024      | AOX1     | AOX2P   |
| chr2 | +(201861953..201862473) | 520 | 4.63887 | 9  | 3  | 6  | 0.3333333 | 0.012      | ORC2     | FAM126B |

|      |                         |      |         |    |    |    |           |            |           |          |   |
|------|-------------------------|------|---------|----|----|----|-----------|------------|-----------|----------|---|
| chr2 | +(202276459..202276965) | 506  | 2.33844 | 10 | 7  | 3  | 0.4       | 0.017      | ALS2CR12  | TRAK2    |   |
| chr2 | +(202319275..202319800) | 525  | 1.21424 | 11 | 5  | 6  | 0.0909091 | 0.00308495 | STRADB    | ALS2CR11 |   |
| chr2 | +(202337401..202338093) | 692  | 1.21424 | 12 | 6  | 6  | 0         | 0.03908455 | STRADB    | ALS2CR11 |   |
| chr2 | +(202534257..202534784) | 527  | 4.63887 | 8  | 3  | 5  | 0.25      | 0.036      | ALS2CR4   | MPP4     |   |
| chr2 | +(202625418..202625936) | 518  | 1.21424 | 10 | 4  | 6  | 0.2       | 0.129      | MPP4      | ALS2     |   |
| chr2 | +(203991382..203991892) | 510  | 4.63887 | 8  | 5  | 3  | 0.25      | 0.018      | NBEAL1    | CYP20A1  |   |
| chr2 | +(204052880..204053385) | 505  | 2.33844 | 10 | 3  | 7  | 0.4       | 0.008      | NBEAL1    | CYP20A1  |   |
| chr2 | +(204510715..204511399) | 684  | 4.63887 | 7  | 3  | 4  | 0.1428571 | 0.029      | RAPH1     | CD28     |   |
| chr2 | +(204594214..204594774) | 560  | 2.33844 | 7  | 4  | 3  | 0.1428571 | 0.029      | CD28      | CTLA4    |   |
| chr2 | +(204735779..204736479) | 700  | 1.21424 | 14 | 9  | 5  | 0.2857143 | 0.04779036 | CTLA4     | ICOS     |   |
| chr2 | +(207075025..207075725) | 700  | 0.0149  | 15 | 5  | 10 | 0.3333333 | 0.00109982 | SNORA41   | GPR1     |   |
| chr2 | +(207577059..207578238) | 1179 | 1.21424 | 16 | 8  | 8  | 0         | 0.99961123 | LOC200726 | DYTN     |   |
| chr2 | +(208865595..208866156) | 561  | 1.21424 | 9  | 6  | 3  | 0.3333333 | 0.048      | FZD5      | PLEKHM3  |   |
| chr2 | +(214239556..214240097) | 541  | 2.33844 | 9  | 5  | 4  | 0.1111111 | 0.008      | SPAG16    | VWC2L    |   |
| chr2 | +(214721161..214721732) | 571  | 0.64523 | 9  | 5  | 4  | 0.1111111 | 0.008      | SPAG16    | VWC2L    |   |
| chr2 | +(216203195..216203895) | 700  | 2.33844 | 11 | 5  | 6  | 0.0909091 | 0.01422987 | ATIC      | FN1      |   |
| chr2 | +(216239712..216240252) | 540  | 4.63887 | 6  | 2  | 4  | 0.3333333 | 0.067      | ATIC      | FN1      |   |
| chr2 | +(217068667..217069252) | 585  | 4.63887 | 9  | 3  | 6  | 0.3333333 | 0.012      | XRCC5     | 40972    |   |
| chr2 | +(218669096..218669651) | 555  | 4.63887 | 6  | 3  | 3  | 0         | 0.05       | DIRC3     | TNS1     |   |
| chr2 | +(218694155..218694691) | 536  | 4.63887 | 6  | 3  | 3  | 0         | 0.05       | DIRC3     | TNS1     |   |
| chr2 | +(218712922..218713658) | 736  | 2.33844 | 13 | 6  | 7  | 0.0769231 | 0.0013499  | DIRC3     | TNS1     |   |
| chr2 | +(219029590..219030141) | 551  | 4.63887 | 7  | 3  | 4  | 0.1428571 | 0.029      | CXCR2     | CXCR1    |   |
| chr2 | +(219609697..219610216) | 519  | 2.33844 | 7  | 4  | 3  | 0.1428571 | 0.029      | TTL4      | CYP27A1  |   |
| chr2 | +(220115630..220116138) | 508  | 0.64523 | 14 | 9  | 5  | 0.2857143 | 0.00981533 | STK16     | TUBA4A   |   |
| chr2 | +(220298749..220299331) | 582  | 1.21424 | 11 | 7  | 4  | 0.2727273 | 0.021      | DES       | SPEG     |   |
| chr2 | +(220316201..220316901) | 700  | 0.04989 | 13 | 4  | 9  | 0.3846154 | 0.001      | SPEG      | GMPPA    | v |
| chr2 | +(220348572..220349126) | 554  | 2.33844 | 8  | 5  | 3  | 0.25      | 0.018      | SPEG      | GMPPA    | v |
| chr2 | +(220355278..220356129) | 851  | 0.0149  | 20 | 9  | 11 | 0.1       | 0.36621995 | SPEG      | GMPPA    | v |
| chr2 | +(220370253..220370951) | 698  | 0.64523 | 10 | 6  | 4  | 0.2       | 0.057      | GMPPA     | ACCN4    | v |
| chr2 | +(220480866..220481433) | 567  | 4.63887 | 6  | 3  | 3  | 0         | 0.05       | STK11IP   | SLC4A3   |   |
| chr2 | +(223511535..223512066) | 531  | 1.34515 | 37 | 23 | 14 | 0.2432432 | 0.04848081 | SGPP2     | FARSB    |   |
| chr2 | +(225653355..225653885) | 530  | 2.33844 | 10 | 3  | 7  | 0.4       | 0.667      | CUL3      | DOCK10   |   |
| chr2 | +(228117691..228118218) | 527  | 2.33844 | 11 | 6  | 5  | 0.0909091 | 0.05017413 | COL4A3    | MFF      |   |
| chr2 | +(228278935..228279635) | 700  | 0.325   | 10 | 6  | 4  | 0.2       | 0.005      | TM4SF20   | AGFG1    |   |

|      |                         |     |         |    |    |    |           |            |           |           |
|------|-------------------------|-----|---------|----|----|----|-----------|------------|-----------|-----------|
| chr2 | +(228356077..228356614) | 537 | 4.63887 | 8  | 3  | 5  | 0.25      | 0.036      | AGFG1     | C2orf83   |
| chr2 | +(228883442..228884142) | 700 | 2.33844 | 9  | 3  | 6  | 0.3333333 | 0.726      | WDR69     | SPHKAP    |
| chr2 | +(230311621..230312321) | 700 | 2.33844 | 10 | 3  | 7  | 0.4       | 0.008      | PID1      | DNER      |
| chr2 | +(230723902..230724570) | 668 | 0.04989 | 20 | 13 | 7  | 0.3       | 0.00148122 | DNER      | TRIP12    |
| chr2 | +(230910211..230910808) | 597 | 4.63887 | 11 | 5  | 6  | 0.0909091 | 0.81934478 | FBXO36    | SLC16A14  |
| chr2 | +(231022570..231023079) | 509 | 4.63887 | 6  | 2  | 4  | 0.3333333 | 0.067      | SLC16A14  | SP110     |
| chr2 | +(231116985..231117497) | 512 | 4.63887 | 6  | 2  | 4  | 0.3333333 | 0.067      | SP140     | SP140L    |
| chr2 | +(231254457..231254980) | 523 | 4.63887 | 7  | 4  | 3  | 0.1428571 | 0.029      | SP140L    | SP100     |
| chr2 | +(231265937..231266569) | 632 | 0.17743 | 44 | 17 | 27 | 0.2272727 | 8.4458E-06 | SP140L    | SP100     |
| chr2 | +(231650338..231651025) | 687 | 4.63887 | 6  | 4  | 2  | 0.3333333 | 0.067      | CAB39     | ITM2C     |
| chr2 | +(232576273..232576859) | 586 | 4.63887 | 9  | 3  | 6  | 0.3333333 | 0.012      | PTMA      | MIR1244-1 |
| chr2 | +(233096540..233097151) | 611 | 2.33844 | 9  | 3  | 6  | 0.3333333 | 0.274      | DIS3L2    | ALPP      |
| chr2 | +(233193433..233194133) | 700 | 4.63887 | 9  | 6  | 3  | 0.3333333 | 0.988      | DIS3L2    | ALPP      |
| chr2 | +(233246552..233247245) | 693 | 1.21424 | 12 | 8  | 4  | 0.3333333 | 0.99671074 | ALPP      | ECEL1P2   |
| chr2 | +(233273758..233274275) | 517 | 4.63887 | 9  | 5  | 4  | 0.1111111 | 0.206      | ALPPL2    | ALPI      |
| chr2 | +(233371183..233371918) | 735 | 0.04989 | 16 | 6  | 10 | 0.25      | 0.00056905 | ECEL1     | LOC646960 |
| chr2 | +(233389920..233390603) | 683 | 4.63887 | 6  | 3  | 3  | 0         | 0.05       | LOC646960 | CHRND     |
| chr2 | +(233632847..233633482) | 635 | 4.63887 | 9  | 6  | 3  | 0.3333333 | 0.274      | GIGYF2    | KCNJ13    |
| chr2 | +(233697201..233697743) | 542 | 4.63887 | 9  | 3  | 6  | 0.3333333 | 0.988      | KCNJ13    | C2orf82   |
| chr2 | +(233700212..233700715) | 503 | 2.33844 | 7  | 4  | 3  | 0.1428571 | 0.029      | KCNJ13    | C2orf82   |
| chr2 | +(233701974..233702702) | 728 | 0.04989 | 13 | 7  | 6  | 0.0769231 | 0.0013499  | KCNJ13    | C2orf82   |
| chr2 | +(233839180..233839711) | 531 | 1.39784 | 20 | 12 | 8  | 0.2       | 0.00131091 | C2orf82   | NGEF      |
| chr2 | +(235430324..235431024) | 700 | 4.63887 | 10 | 4  | 6  | 0.2       | 0.995      | ARL4C     | SH3BP4    |
| chr2 | +(235748395..235748905) | 510 | 1.21424 | 8  | 3  | 5  | 0.25      | 0.018      | ARL4C     | SH3BP4    |
| chr2 | +(235890945..235891645) | 700 | 0.18049 | 13 | 9  | 4  | 0.3846154 | 0.001      | SH3BP4    | AGAP1     |
| chr2 | +(235907395..235908095) | 700 | 0.08723 | 13 | 7  | 6  | 0.0769231 | 0.02275014 | SH3BP4    | AGAP1     |
| chr2 | +(236336506..236337160) | 654 | 1.21424 | 8  | 5  | 3  | 0.25      | 0.018      | SH3BP4    | AGAP1     |
| chr2 | +(236570224..236570863) | 639 | 4.63887 | 8  | 3  | 5  | 0.25      | 0.5        | AGAP1     | GBX2      |
| chr2 | +(237262845..237263545) | 700 | 0.325   | 10 | 7  | 3  | 0.4       | 0.008      | ASB18     | IQCA1     |
| chr2 | +(237411221..237411874) | 653 | 0.64523 | 9  | 5  | 4  | 0.1111111 | 0.008      | ASB18     | IQCA1     |
| chr2 | +(238161321..238162021) | 700 | 0.64523 | 11 | 7  | 4  | 0.2727273 | 0.003      | COPS8     | COL6A3    |
| chr2 | +(238320649..238321209) | 560 | 0.325   | 10 | 4  | 6  | 0.2       | 0.005      | COPS8     | COL6A3    |
| chr2 | +(238345539..238346239) | 700 | 0.04989 | 13 | 8  | 5  | 0.2307692 | 0.0017074  | COL6A3    | MLPH      |
| chr2 | +(238946503..238947060) | 557 | 2.33844 | 7  | 4  | 3  | 0.1428571 | 0.029      | UBE2F     | SCLY      |

|      |                         |      |         |    |    |    |           |             |           |         |
|------|-------------------------|------|---------|----|----|----|-----------|-------------|-----------|---------|
| chr2 | +(239165283..239165890) | 607  | 2.33844 | 7  | 4  | 3  | 0.1428571 | 0.029       | HES6      | PER2    |
| chr2 | +(240063334..240064034) | 700  | 0.18049 | 11 | 5  | 6  | 0.0909091 | 0.00308495  | FLJ43879  | HDAC4   |
| chr2 | +(240299072..240299772) | 700  | 2.33844 | 12 | 7  | 5  | 0.1666667 | 0.00224163  | FLJ43879  | HDAC4   |
| chr2 | +(240418754..240419454) | 700  | 1.21424 | 13 | 8  | 5  | 0.2307692 | 0.0017074   | MIR4269   | NDUFA10 |
| chr2 | +(240423789..240424489) | 700  | 0.04989 | 13 | 5  | 8  | 0.2307692 | 0.0017074   | MIR4269   | NDUFA10 |
| chr2 | +(240455557..240456257) | 700  | 0.325   | 10 | 7  | 3  | 0.4       | 0.008       | MIR4269   | NDUFA10 |
| chr2 | +(240559127..240559827) | 700  | 0.325   | 10 | 7  | 3  | 0.4       | 0.008       | MIR4269   | NDUFA10 |
| chr2 | +(240685489..240686109) | 620  | 4.63887 | 6  | 3  | 3  | 0         | 0.05        | MIR4269   | NDUFA10 |
| chr2 | +(240922888..240923452) | 564  | 1.21424 | 9  | 4  | 5  | 0.1111111 | 0.008       | MIR4269   | NDUFA10 |
| chr2 | +(240972329..240973178) | 849  | 0.00139 | 24 | 9  | 15 | 0.25      | 0.00786861  | OR6B2     | PRR21   |
| chr2 | +(240980969..240981956) | 987  | 2.33844 | 19 | 8  | 11 | 0.1578947 | 0.254444141 | OR6B2     | PRR21   |
| chr2 | +(240985036..240985558) | 522  | 4.63887 | 14 | 8  | 6  | 0.1428571 | 0.92220982  | PRR21     | OR6B3   |
| chr2 | +(241068856..241069813) | 957  | 2.33844 | 13 | 7  | 6  | 0.0769231 | 0.98393771  | OR6B3     | MYEOV2  |
| chr2 | +(241106847..241107547) | 700  | 4.63887 | 9  | 3  | 6  | 0.3333333 | 0.012       | OTOS      | GPC1    |
| chr2 | +(241287849..241288444) | 595  | 4.63887 | 6  | 3  | 3  | 0         | 0.05        | OTOS      | GPC1    |
| chr2 | +(241369915..241371036) | 1121 | 4.63887 | 12 | 6  | 6  | 0         | 0.99802612  | OTOS      | GPC1    |
| chr2 | +(241387901..241388454) | 553  | 4.63887 | 9  | 6  | 3  | 0.3333333 | 0.012       | GPC1      | PP14571 |
| chr2 | +(241403053..241404145) | 1092 | 4.63887 | 13 | 6  | 7  | 0.0769231 | 0.02275014  | MIR149    | ANKMY1  |
| chr2 | +(241406429..241407129) | 700  | 1.21424 | 9  | 3  | 6  | 0.3333333 | 0.012       | MIR149    | ANKMY1  |
| chr2 | +(241450687..241451205) | 518  | 0.325   | 10 | 3  | 7  | 0.4       | 0.008       | MIR149    | ANKMY1  |
| chr2 | +(241565270..241565882) | 612  | 2.33844 | 12 | 5  | 7  | 0.1666667 | 0.18587565  | GPR35     | AQP12B  |
| chr2 | +(241666137..241666812) | 675  | 1.21424 | 10 | 3  | 7  | 0.4       | 0.017       | AQP12A    | KIF1A   |
| chr2 | +(241695753..241696278) | 525  | 1.21424 | 8  | 3  | 5  | 0.25      | 0.018       | AQP12A    | KIF1A   |
| chr2 | +(241707233..241707918) | 685  | 4.63887 | 6  | 2  | 4  | 0.3333333 | 0.067       | AQP12A    | KIF1A   |
| chr2 | +(241758143..241758693) | 550  | 4.63887 | 6  | 4  | 2  | 0.3333333 | 0.067       | AQP12A    | KIF1A   |
| chr2 | +(241816602..241817217) | 615  | 2.33844 | 7  | 4  | 3  | 0.1428571 | 0.029       | AGXT      | C2orf54 |
| chr2 | +(241936148..241936793) | 645  | 0.64523 | 9  | 6  | 3  | 0.3333333 | 0.012       | LOC200772 | SNED1   |
| chr2 | +(241974077..241974962) | 885  | 1.21424 | 13 | 5  | 8  | 0.2307692 | 0.0394913   | SNED1     | MTERFD2 |
| chr2 | +(242009361..242009864) | 503  | 1.21424 | 8  | 3  | 5  | 0.25      | 0.018       | SNED1     | MTERFD2 |
| chr2 | +(242075149..242075849) | 700  | 0.325   | 15 | 10 | 5  | 0.3333333 | 0.00715294  | MTERFD2   | PASK    |
| chr2 | +(242148132..242148832) | 700  | 0.04989 | 16 | 7  | 9  | 0.125     | 0.31691947  | ANO7      | HDLBP   |
| chr2 | +(242179106..242179721) | 615  | 0.64523 | 10 | 5  | 5  | 0         | 0.02360089  | ANO7      | HDLBP   |
| chr2 | +(242651290..242651842) | 552  | 4.63887 | 10 | 6  | 4  | 0.2       | 0.762       | ING5      | D2HGDH  |
| chr2 | +(242658348..242658941) | 593  | 2.33844 | 7  | 4  | 3  | 0.1428571 | 0.029       | ING5      | D2HGDH  |

|      |                         |      |         |    |    |    |           |            |          |          |
|------|-------------------------|------|---------|----|----|----|-----------|------------|----------|----------|
| chr2 | +(242683010..242683595) | 585  | 2.33844 | 7  | 4  | 3  | 0.1428571 | 0.029      | D2HGDH   | GAL3ST2  |
| chr2 | +(242752245..242753737) | 1492 | 2.33844 | 22 | 15 | 7  | 0.3636364 | 0.00010748 | NEU4     | PDCD1    |
| chr3 | +(440485..441008)       | 523  | 3.63011 | 8  | 5  | 3  | 0.25      | 0.018      | CHL1     | CNTN6    |
| chr3 | +(586935..588113)       | 1178 | 0.091   | 18 | 7  | 11 | 0.2222222 | 0.9997556  | CHL1     | CNTN6    |
| chr3 | +(900566..901266)       | 700  | 0.74291 | 12 | 4  | 8  | 0.3333333 | 0.893      | CHL1     | CNTN6    |
| chr3 | +(4354848..4355391)     | 543  | 1.68843 | 9  | 4  | 5  | 0.1111111 | 0.143      | SETMAR   | SUMF1    |
| chr3 | +(4486469..4487691)     | 1222 | 0.091   | 17 | 6  | 11 | 0.2941176 | 0.00045556 | SETMAR   | SUMF1    |
| chr3 | +(4732643..4733174)     | 531  | 3.63011 | 8  | 5  | 3  | 0.25      | 0.036      | ITPR1    | EGOT     |
| chr3 | +(4770035..4770735)     | 700  | 1.68843 | 12 | 5  | 7  | 0.1666667 | 0.99775837 | ITPR1    | EGOT     |
| chr3 | +(5164016..5164652)     | 636  | 0.091   | 16 | 8  | 8  | 0         | 0.00038877 | ARL8B    | EDEM1    |
| chr3 | +(8595900..8596412)     | 512  | 1.68843 | 7  | 3  | 4  | 0.1428571 | 0.029      | LMCD1    | LOH3CR2A |
| chr3 | +(8677084..8677784)     | 700  | 0.04455 | 12 | 8  | 4  | 0.3333333 | 0.99671074 | LOH3CR2A | C3orf32  |
| chr3 | +(8683075..8684128)     | 1053 | 3.63011 | 12 | 6  | 6  | 0         | 0.99802612 | LOH3CR2A | C3orf32  |
| chr3 | +(9054683..9055373)     | 690  | 3.63011 | 11 | 5  | 6  | 0.0909091 | 0.13666084 | RAD18    | SRGAP3   |
| chr3 | +(9487055..9487627)     | 572  | 0.74291 | 9  | 3  | 6  | 0.3333333 | 0.024      | SETD5    | LHFPL4   |
| chr3 | +(9798036..9798710)     | 674  | 1.68843 | 12 | 5  | 7  | 0.1666667 | 0.08373231 | OGG1     | CAMK1    |
| chr3 | +(9984952..9985461)     | 509  | 3.63011 | 6  | 4  | 2  | 0.3333333 | 0.067      | CRELD1   | PRRT3    |
| chr3 | +(9985858..9986380)     | 522  | 0.74291 | 9  | 5  | 4  | 0.1111111 | 0.008      | CRELD1   | PRRT3    |
| chr3 | +(10381560..10382074)   | 514  | 1.68843 | 7  | 3  | 4  | 0.1428571 | 0.029      | SEC13    | ATP2B2   |
| chr3 | +(10954212..10954789)   | 577  | 0.74291 | 12 | 8  | 4  | 0.3333333 | 0.99671074 | SLC6A11  | SLC6A1   |
| chr3 | +(10976678..10977389)   | 711  | 0.04455 | 13 | 8  | 5  | 0.2307692 | 0.0394913  | SLC6A11  | SLC6A1   |
| chr3 | +(11007705..11008405)   | 700  | 0.74291 | 10 | 4  | 6  | 0.2       | 0.005      | SLC6A11  | SLC6A1   |
| chr3 | +(11651818..11652397)   | 579  | 3.63011 | 6  | 2  | 4  | 0.3333333 | 0.067      | ATG7     | VGLL4    |
| chr3 | +(12360825..12361521)   | 696  | 3.63011 | 10 | 6  | 4  | 0.2       | 0.005      | PPARG    | TSEN2    |
| chr3 | +(12637205..12637809)   | 604  | 3.63011 | 6  | 3  | 3  | 0         | 0.05       | MKRN2    | RAF1     |
| chr3 | +(12947992..12948546)   | 554  | 3.63011 | 7  | 4  | 3  | 0.1428571 | 0.314      | SNORA7A  | IQSEC1   |
| chr3 | +(12973010..12973710)   | 700  | 0.18343 | 10 | 3  | 7  | 0.4       | 0.008      | SNORA7A  | IQSEC1   |
| chr3 | +(12989196..12989896)   | 700  | 3.63011 | 11 | 6  | 5  | 0.0909091 | 0.99691505 | SNORA7A  | IQSEC1   |
| chr3 | +(13019738..13020291)   | 553  | 0.74291 | 8  | 5  | 3  | 0.25      | 0.018      | SNORA7A  | IQSEC1   |
| chr3 | +(13138682..13139382)   | 700  | 0.36666 | 13 | 9  | 4  | 0.3846154 | 0.207      | IQSEC1   | NUP210   |
| chr3 | +(13175021..13175522)   | 501  | 3.63011 | 8  | 4  | 4  | 0         | 0.014      | IQSEC1   | NUP210   |
| chr3 | +(13181982..13182627)   | 645  | 3.63011 | 10 | 4  | 6  | 0.2       | 0.057      | IQSEC1   | NUP210   |
| chr3 | +(13240003..13240889)   | 886  | 0.18343 | 16 | 7  | 9  | 0.125     | 0.00042755 | IQSEC1   | NUP210   |
| chr3 | +(13256432..13257406)   | 974  | 3.63011 | 12 | 6  | 6  | 0         | 0.00197388 | IQSEC1   | NUP210   |

|      |                       |      |         |    |    |    |           |            |           |           |   |
|------|-----------------------|------|---------|----|----|----|-----------|------------|-----------|-----------|---|
| chr3 | +(13376477..13376996) | 519  | 1.68843 | 7  | 4  | 3  | 0.1428571 | 0.029      | IQSEC1    | NUP210    |   |
| chr3 | +(13417452..13418152) | 700  | 0.36666 | 10 | 4  | 6  | 0.2       | 0.01       | IQSEC1    | NUP210    |   |
| chr3 | +(13438184..13438877) | 693  | 3.63011 | 11 | 5  | 6  | 0.0909091 | 0.99691505 | IQSEC1    | NUP210    |   |
| chr3 | +(13624832..13626164) | 1332 | 0.091   | 20 | 9  | 11 | 0.1       | 0.00172235 | FBLN2     | LOC285375 |   |
| chr3 | +(13660980..13661558) | 578  | 1.68843 | 9  | 5  | 4  | 0.1111111 | 0.008      | FBLN2     | LOC285375 |   |
| chr3 | +(13675825..13676525) | 700  | 0.00277 | 16 | 5  | 11 | 0.375     | 0.0009184  | FBLN2     | LOC285375 |   |
| chr3 | +(13678415..13679115) | 700  | 0.091   | 14 | 9  | 5  | 0.2857143 | 0.15865525 | FBLN2     | LOC285375 |   |
| chr3 | +(14197409..14198201) | 792  | 0.74291 | 14 | 5  | 9  | 0.2857143 | 0.04779036 | TMEM43    | XPC       |   |
| chr3 | +(14513606..14514205) | 599  | 3.63011 | 9  | 6  | 3  | 0.3333333 | 0.024      | SLC6A6    | GRIP2     |   |
| chr3 | +(14514467..14515190) | 723  | 0.01005 | 20 | 6  | 14 | 0.4       | 0.000266   | SLC6A6    | GRIP2     |   |
| chr3 | +(14519689..14520190) | 501  | 3.63011 | 13 | 7  | 6  | 0.0769231 | 0.01606229 | SLC6A6    | GRIP2     |   |
| chr3 | +(14537972..14538668) | 696  | 0.74291 | 13 | 8  | 5  | 0.2307692 | 0.9982926  | SLC6A6    | GRIP2     |   |
| chr3 | +(14553216..14553826) | 610  | 3.63011 | 6  | 2  | 4  | 0.3333333 | 0.067      | SLC6A6    | GRIP2     |   |
| chr3 | +(14713374..14713995) | 621  | 0.74291 | 8  | 4  | 4  | 0         | 0.014      | C3orf19   | C3orf20   |   |
| chr3 | +(15025759..15026459) | 700  | 3.63011 | 11 | 5  | 6  | 0.0909091 | 0.99691505 | NR2C2     | MRPS25    |   |
| chr3 | +(15218912..15219637) | 725  | 0.04455 | 12 | 6  | 6  | 0         | 0.00197388 | ZFYVE20   | COL6A4P1  |   |
| chr3 | +(15349789..15350420) | 631  | 3.63011 | 6  | 2  | 4  | 0.3333333 | 0.067      | CAPN7     | SH3BP5    |   |
| chr3 | +(15643321..15644003) | 682  | 3.63011 | 14 | 6  | 8  | 0.1428571 | 0.78071098 | BTD       | ANKRD28   |   |
| chr3 | +(16219526..16220216) | 690  | 0.36666 | 9  | 3  | 6  | 0.3333333 | 0.012      | GALNTL2   | DPH3      |   |
| chr3 | +(19432090..19432616) | 526  | 3.63011 | 6  | 4  | 2  | 0.3333333 | 0.067      | KCNH8     | EFHB      |   |
| chr3 | +(19864670..19865291) | 621  | 3.63011 | 7  | 4  | 3  | 0.1428571 | 0.314      | KCNH8     | EFHB      |   |
| chr3 | +(21456131..21456722) | 591  | 3.63011 | 6  | 3  | 3  | 0         | 0.05       | VENTXP7   | ZNF385D   |   |
| chr3 | +(21552369..21552954) | 585  | 0.36666 | 14 | 9  | 5  | 0.2857143 | 0.42074029 | VENTXP7   | ZNF385D   |   |
| chr3 | +(23123084..23123784) | 700  | 0.02052 | 13 | 8  | 5  | 0.2307692 | 0.0017074  | ZNF385D   | UBE2E2    |   |
| chr3 | +(23958404..23958959) | 555  | 0.36666 | 9  | 4  | 5  | 0.1111111 | 0.008      | UBE2E1    | NKIRAS1   |   |
| chr3 | +(23997252..23997779) | 527  | 3.63011 | 9  | 4  | 5  | 0.1111111 | 0.008      | NR1D2     | LOC152024 |   |
| chr3 | +(24486134..24486731) | 597  | 1.68843 | 7  | 3  | 4  | 0.1428571 | 0.029      | LOC152024 | THR3      |   |
| chr3 | +(25796454..25796985) | 531  | 3.63011 | 8  | 4  | 4  | 0         | 0.014      | TOP2B     | NGLY1     |   |
| chr3 | +(26727030..26728110) | 1080 | 0.18343 | 19 | 10 | 9  | 0.0526316 | 0.00011928 | LRRC3B    | NEK10     |   |
| chr3 | +(27527732..27528273) | 541  | 0.36666 | 11 | 4  | 7  | 0.2727273 | 0.003      | SLC4A7    | EOMES     | v |
| chr3 | +(27761311..27761843) | 532  | 0.74291 | 13 | 5  | 8  | 0.2307692 | 0.0017074  | SLC4A7    | EOMES     | v |
| chr3 | +(28520157..28520746) | 589  | 0.36666 | 10 | 4  | 6  | 0.2       | 0.01       | ZCWPW2    | RBMS3     |   |
| chr3 | +(31621294..31621796) | 502  | 3.63011 | 12 | 7  | 5  | 0.1666667 | 0.18587565 | STT3B     | OSBPL10   |   |
| chr3 | +(32364223..32364801) | 578  | 3.63011 | 10 | 4  | 6  | 0.2       | 0.943      | CMTM8     | CMTM7     |   |

|      |                       |      |         |    |   |    |           |            |          |          |
|------|-----------------------|------|---------|----|---|----|-----------|------------|----------|----------|
| chr3 | +(32398654..32399218) | 564  | 1.68843 | 7  | 3 | 4  | 0.1428571 | 0.029      | CMTM8    | CMTM7    |
| chr3 | +(33649892..33650501) | 609  | 0.74291 | 12 | 8 | 4  | 0.3333333 | 0.184      | UBP1     | CLASP2   |
| chr3 | +(33907739..33908244) | 505  | 0.74291 | 10 | 6 | 4  | 0.2       | 0.129      | PDCD6IP  | ARPP21   |
| chr3 | +(33951932..33952632) | 700  | 0.091   | 11 | 7 | 4  | 0.2727273 | 0.003      | PDCD6IP  | ARPP21   |
| chr3 | +(36779299..36779939) | 640  | 3.63011 | 12 | 8 | 4  | 0.3333333 | 0.404      | STAC     | DCLK3    |
| chr3 | +(37053038..37053571) | 533  | 1.68843 | 11 | 7 | 4  | 0.2727273 | 0.006      | MLH1     | LRRFIP2  |
| chr3 | +(37124900..37125488) | 588  | 1.68843 | 9  | 6 | 3  | 0.3333333 | 0.012      | MLH1     | LRRFIP2  |
| chr3 | +(37175929..37176434) | 505  | 3.63011 | 9  | 3 | 6  | 0.3333333 | 0.19       | MLH1     | LRRFIP2  |
| chr3 | +(37388434..37388966) | 532  | 3.63011 | 12 | 8 | 4  | 0.3333333 | 0.99671074 | GOLGA4   | C3orf35  |
| chr3 | +(38167687..38169101) | 1414 | 0.091   | 26 | 8 | 18 | 0.3846154 | 3.1671E-05 | DLEC1    | ACAA1    |
| chr3 | +(38349734..38350330) | 596  | 3.63011 | 6  | 3 | 3  | 0         | 0.05       | SLC22A14 | XYLB     |
| chr3 | +(38354788..38355480) | 692  | 0.36666 | 9  | 5 | 4  | 0.1111111 | 0.008      | SLC22A14 | XYLB     |
| chr3 | +(38515254..38515915) | 661  | 3.63011 | 6  | 2 | 4  | 0.3333333 | 0.067      | ACVR2B   | EXOGEN   |
| chr3 | +(38611645..38612345) | 700  | 0.18343 | 10 | 4 | 6  | 0.2       | 0.005      | EXOGEN   | SCN5A    |
| chr3 | +(38670552..38671243) | 691  | 0.18343 | 15 | 5 | 10 | 0.3333333 | 0.5        | EXOGEN   | SCN5A    |
| chr3 | +(38739183..38739772) | 589  | 0.18343 | 13 | 6 | 7  | 0.0769231 | 0.01606229 | SCN5A    | SCN10A   |
| chr3 | +(38763350..38764512) | 1162 | 1.68843 | 14 | 6 | 8  | 0.1428571 | 0.00097289 | SCN5A    | SCN10A   |
| chr3 | +(38797006..38797528) | 522  | 3.63011 | 14 | 8 | 6  | 0.1428571 | 0.00097289 | SCN5A    | SCN10A   |
| chr3 | +(39142294..39142914) | 620  | 0.74291 | 11 | 7 | 4  | 0.2727273 | 0.006      | WDR48    | GORASP1  |
| chr3 | +(39153326..39154052) | 726  | 1.68843 | 14 | 7 | 7  | 0         | 0.01267366 | TTC21A   | CSRNP1   |
| chr3 | +(39169802..39170306) | 504  | 0.36666 | 10 | 3 | 7  | 0.4       | 0.033      | TTC21A   | CSRNP1   |
| chr3 | +(39185134..39185834) | 700  | 0.091   | 12 | 7 | 5  | 0.1666667 | 0.03090926 | TTC21A   | CSRNP1   |
| chr3 | +(39195425..39196125) | 700  | 0.091   | 13 | 4 | 9  | 0.3846154 | 0.47       | CSRNP1   | XIRP1    |
| chr3 | +(39374138..39374653) | 515  | 1.68843 | 12 | 8 | 4  | 0.3333333 | 0.404      | CCR8     | SLC25A38 |
| chr3 | +(39537958..39538609) | 651  | 1.68843 | 7  | 3 | 4  | 0.1428571 | 0.029      | MOBP     | MYRIP    |
| chr3 | +(42576556..42577071) | 515  | 3.63011 | 12 | 4 | 8  | 0.3333333 | 0.285      | VIPR1    | SEC22C   |
| chr3 | +(44621474..44622007) | 533  | 3.63011 | 6  | 3 | 3  | 0         | 0.05       | ZNF167   | ZNF660   |
| chr3 | +(44776266..44776821) | 555  | 3.63011 | 8  | 3 | 5  | 0.25      | 0.196      | ZNF501   | KIAA1143 |
| chr3 | +(47098214..47098852) | 638  | 0.36666 | 11 | 4 | 7  | 0.2727273 | 0.264      | NRADDP   | SETD2    |
| chr3 | +(47384855..47385553) | 698  | 1.68843 | 7  | 4 | 3  | 0.1428571 | 0.029      | KLHL18   | PTPN23   |
| chr3 | +(47742625..47743174) | 549  | 3.63011 | 8  | 5 | 3  | 0.25      | 0.286      | CSPG5    | SMARCC1  |
| chr3 | +(47755719..47756242) | 523  | 0.36666 | 14 | 8 | 6  | 0.1428571 | 0.00491164 | CSPG5    | SMARCC1  |
| chr3 | +(47910769..47911908) | 1139 | 0.04455 | 19 | 6 | 13 | 0.3684211 | 0.00190008 | MIR1226  | MAP4     |
| chr3 | +(47912251..47912783) | 532  | 3.63011 | 6  | 3 | 3  | 0         | 0.05       | MIR1226  | MAP4     |

|      |                       |      |         |    |    |   |           |            |          |          |
|------|-----------------------|------|---------|----|----|---|-----------|------------|----------|----------|
| chr3 | +(48447780..48448480) | 700  | 0.36666 | 10 | 7  | 3 | 0.4       | 0.008      | FBXW12   | PLXNB1   |
| chr3 | +(48450420..48451040) | 620  | 0.74291 | 9  | 6  | 3 | 0.3333333 | 0.012      | FBXW12   | PLXNB1   |
| chr3 | +(48473807..48474372) | 565  | 1.68843 | 9  | 5  | 4 | 0.1111111 | 0.008      | PLXNB1   | CCDC51   |
| chr3 | +(48510189..48510799) | 610  | 3.63011 | 6  | 4  | 2 | 0.3333333 | 0.067      | TREX1    | SHISA5   |
| chr3 | +(48588219..48588748) | 529  | 0.74291 | 8  | 4  | 4 | 0         | 0.014      | SHISA5   | PFKFB4   |
| chr3 | +(49073915..49074613) | 698  | 0.36666 | 9  | 6  | 3 | 0.3333333 | 0.012      | IMPDH2   | QRICH1   |
| chr3 | +(49278522..49279217) | 695  | 1.68843 | 10 | 7  | 3 | 0.4       | 0.058      | CCDC36   | C3orf62  |
| chr3 | +(49722811..49723346) | 535  | 0.18343 | 15 | 10 | 5 | 0.3333333 | 0.04320538 | APEH     | MST1     |
| chr3 | +(49749872..49750421) | 549  | 3.63011 | 6  | 2  | 4 | 0.3333333 | 0.067      | RNF123   | AMIGO3   |
| chr3 | +(49836316..49836838) | 522  | 1.68843 | 10 | 5  | 5 | 0         | 0.05859256 | IP6K1    | CDHR4    |
| chr3 | +(50401848..50402548) | 700  | 0.091   | 12 | 5  | 7 | 0.1666667 | 0.00224163 | TMEM115  | CACNA2D2 |
| chr3 | +(50418358..50418907) | 549  | 3.63011 | 9  | 4  | 5 | 0.1111111 | 0.008      | TMEM115  | CACNA2D2 |
| chr3 | +(50526948..50528071) | 1123 | 0.74291 | 16 | 8  | 8 | 0         | 0.97064629 | TMEM115  | CACNA2D2 |
| chr3 | +(50604278..50604978) | 700  | 0.18343 | 11 | 5  | 6 | 0.0909091 | 0.00308495 | CACNA2D2 | C3orf18  |
| chr3 | +(51411578..51412278) | 700  | 0.36666 | 14 | 5  | 9 | 0.2857143 | 0.00981533 | DOCK3    | MANF     |
| chr3 | +(52153804..52154715) | 911  | 0.36666 | 18 | 9  | 9 | 0         | 0.00017429 | C3orf74  | POC1A    |
| chr3 | +(52281538..52282098) | 560  | 1.68843 | 7  | 3  | 4 | 0.1428571 | 0.029      | PPM1M    | WDR82    |
| chr3 | +(52427242..52427776) | 534  | 3.66733 | 16 | 11 | 5 | 0.375     | 0.0009184  | DNAH1    | BAP1     |
| chr3 | +(52524622..52525128) | 506  | 3.63011 | 7  | 4  | 3 | 0.1428571 | 0.057      | NISCH    | STAB1    |
| chr3 | +(52555003..52555605) | 602  | 3.63011 | 6  | 3  | 3 | 0         | 0.05       | STAB1    | NT5DC2   |
| chr3 | +(52780606..52781117) | 511  | 3.63011 | 9  | 4  | 5 | 0.1111111 | 0.008      | SPCS1    | NEK4     |
| chr3 | +(52955565..52956091) | 526  | 3.63011 | 8  | 4  | 4 | 0         | 0.014      | TMEM110  | SFMBT1   |
| chr3 | +(52964795..52965311) | 516  | 3.63011 | 7  | 3  | 4 | 0.1428571 | 0.029      | TMEM110  | SFMBT1   |
| chr3 | +(53223096..53224177) | 1081 | 0.74291 | 15 | 8  | 7 | 0.0666667 | 0.99245637 | PRKCD    | TKT      |
| chr3 | +(55041597..55042171) | 574  | 3.63011 | 6  | 4  | 2 | 0.3333333 | 0.067      | LRTM1    | WNT5A    |
| chr3 | +(56716112..56716739) | 627  | 3.63011 | 9  | 3  | 6 | 0.3333333 | 0.988      | CCDC66   | C3orf63  |
| chr3 | +(57847540..57848064) | 524  | 3.63011 | 9  | 4  | 5 | 0.1111111 | 0.095      | SLMAP    | FLNB     |
| chr3 | +(58067177..58067877) | 700  | 0.091   | 12 | 8  | 4 | 0.3333333 | 0.024      | FLNB     | DNASE1L3 |
| chr3 | +(65350496..65351049) | 553  | 0.36666 | 17 | 9  | 8 | 0.0588235 | 0.000266   | MIR548A2 | MAGI1    |
| chr3 | +(69056560..69057245) | 685  | 1.68843 | 10 | 7  | 3 | 0.4       | 0.258      | FAM19A4  | C3orf64  |
| chr3 | +(69150690..69151390) | 700  | 0.74291 | 11 | 4  | 7 | 0.2727273 | 0.003      | ARL6IP5  | LMOD3    |
| chr3 | +(70317159..70317665) | 506  | 0.74291 | 8  | 5  | 3 | 0.25      | 0.018      | MITF     | FOXP1    |
| chr3 | +(71378036..71378736) | 700  | 0.091   | 11 | 6  | 5 | 0.0909091 | 0.00308495 | MITF     | FOXP1    |
| chr3 | +(71384820..71385428) | 608  | 3.63011 | 6  | 3  | 3 | 0         | 0.05       | MITF     | FOXP1    |



|      |                         |      |         |    |    |    |           |            |              |           |
|------|-------------------------|------|---------|----|----|----|-----------|------------|--------------|-----------|
| chr3 | +(72873305..72873863)   | 558  | 3.63011 | 6  | 4  | 2  | 0.3333333 | 0.067      | RYBP         | SHQ1      |
| chr3 | +(75714558..75715093)   | 535  | 2.57182 | 32 | 20 | 12 | 0.25      | 0.00080823 | FRG2C        | ZNF717    |
| chr3 | +(75719523..75720076)   | 553  | 0.18343 | 13 | 7  | 6  | 0.0769231 | 0.0992714  | FRG2C        | ZNF717    |
| chr3 | +(75790448..75790987)   | 539  | 3.63011 | 13 | 9  | 4  | 0.3846154 | 0.355      | FRG2C        | ZNF717    |
| chr3 | +(87289634..87290163)   | 529  | 0.36666 | 12 | 4  | 8  | 0.3333333 | 0.00328926 | CHMP2B       | POU1F1    |
| chr3 | +(93560398..93560989)   | 591  | 0.36666 | 9  | 5  | 4  | 0.1111111 | 0.008      | EPHA3        | PROS1     |
| chr3 | +(93624735..93625243)   | 508  | 3.63011 | 8  | 4  | 4  | 0         | 0.1        | EPHA3        | PROS1     |
| chr3 | +(93794808..93795404)   | 596  | 0.74291 | 12 | 5  | 7  | 0.1666667 | 0.01417552 | NSUN3        | LOC255025 |
| chr3 | +(94593514..94594130)   | 616  | 3.63011 | 6  | 2  | 4  | 0.3333333 | 0.067      | NSUN3        | LOC255025 |
| chr3 | +(96706453..96706979)   | 526  | 3.63011 | 10 | 6  | 4  | 0.2       | 0.305      | EPHA6        | ARL6      |
| chr3 | +(97679816..97680516)   | 700  | 0.04455 | 12 | 4  | 8  | 0.3333333 | 0.00328926 | ARL6         | MINA      |
| chr3 | +(98188745..98189367)   | 622  | 0.36666 | 16 | 8  | 8  | 0         | 0.01371158 | OR5K1        | OR5K2     |
| chr3 | +(98216350..98216854)   | 504  | 3.63011 | 11 | 5  | 6  | 0.0909091 | 0.57243393 | OR5K1        | OR5K2     |
| chr3 | +(99566844..99567383)   | 539  | 1.68843 | 16 | 10 | 6  | 0.25      | 0.00851093 | DCBLD2       | MIR548G   |
| chr3 | +(99569228..99569735)   | 507  | 1.68843 | 12 | 6  | 6  | 0         | 0.05465729 | DCBLD2       | MIR548G   |
| chr3 | +(100104886..100105415) | 529  | 1.68843 | 7  | 4  | 3  | 0.1428571 | 0.029      | NIT2         | TOMM70A   |
| chr3 | +(100438719..100439391) | 672  | 1.68843 | 11 | 7  | 4  | 0.2727273 | 0.158      | TFG          | ABI3BP    |
| chr3 | +(101383957..101384533) | 576  | 3.63011 | 8  | 3  | 5  | 0.25      | 0.286      | PCNP         | ZBTB11    |
| chr3 | +(107798564..107799115) | 551  | 3.63011 | 8  | 3  | 5  | 0.25      | 0.286      | LOC285205    | CD47      |
| chr3 | +(108147435..108148043) | 608  | 1.68843 | 11 | 6  | 5  | 0.0909091 | 0.29194121 | HHLA2        | MYH15     |
| chr3 | +(108279199..108279767) | 568  | 3.63011 | 11 | 5  | 6  | 0.0909091 | 0.10062131 | MYH15        | KIAA1524  |
| chr3 | +(108408249..108408759) | 510  | 3.63011 | 6  | 4  | 2  | 0.3333333 | 0.067      | DZIP3        | RETNLB    |
| chr3 | +(112256799..112257330) | 531  | 0.74291 | 11 | 4  | 7  | 0.2727273 | 0.012      | BTLA         | ATG3      |
| chr3 | +(112262902..112263602) | 700  | 0.74291 | 13 | 9  | 4  | 0.3846154 | 0.98       | BTLA         | ATG3      |
| chr3 | +(113120000..113120504) | 504  | 3.63011 | 8  | 3  | 5  | 0.25      | 0.286      | BOC          | WDR52     |
| chr3 | +(113172171..113172682) | 511  | 3.63011 | 10 | 7  | 3  | 0.4       | 0.058      | WDR52        | SPICE1    |
| chr3 | +(113516902..113517428) | 526  | 3.63011 | 7  | 3  | 4  | 0.1428571 | 0.029      | ATP6V1A      | GRAMD1C   |
| chr3 | +(118865368..118866029) | 661  | 1.68843 | 7  | 3  | 4  | 0.1428571 | 0.029      | C3orf30      | UPK1B     |
| chr3 | +(119064078..119064768) | 690  | 0.74291 | 10 | 6  | 4  | 0.2       | 0.005      | ARHGAP31     | TMEM39A   |
| chr3 | +(120719038..120720432) | 1394 | 0.00483 | 24 | 10 | 14 | 0.1666667 | 0.8792167  | STXBP5L      | POLQ      |
| chr3 | +(122003391..122003914) | 523  | 3.63011 | 8  | 4  | 4  | 0         | 0.014      | CASR         | CSTA      |
| chr3 | +(122639836..122640356) | 520  | 1.68843 | 7  | 3  | 4  | 0.1428571 | 0.029      | LOC100129550 | SEMA5B    |
| chr3 | +(123412078..123412650) | 572  | 3.63011 | 6  | 2  | 4  | 0.3333333 | 0.067      | PTPLB        | MYLK      |
| chr3 | +(123512615..123513264) | 649  | 3.63011 | 9  | 3  | 6  | 0.3333333 | 0.988      | PTPLB        | MYLK      |

|      |                         |      |         |    |    |    |           |            |              |           |   |
|------|-------------------------|------|---------|----|----|----|-----------|------------|--------------|-----------|---|
| chr3 | +(124488119..124488666) | 547  | 0.74291 | 8  | 5  | 3  | 0.25      | 0.018      | UMPS         | ITGB5     |   |
| chr3 | +(124636398..124637090) | 692  | 3.63011 | 10 | 6  | 4  | 0.2       | 0.005      | ITGB5        | MUC13     |   |
| chr3 | +(125283566..125284099) | 533  | 0.74291 | 15 | 5  | 10 | 0.3333333 | 0.99890018 | SNX4         | OSBPL11   |   |
| chr3 | +(125422076..125422645) | 569  | 3.63011 | 9  | 4  | 5  | 0.1111111 | 0.008      | OSBPL11      | MIR548I1  |   |
| chr3 | +(125647328..125647876) | 548  | 1.68843 | 11 | 5  | 6  | 0.0909091 | 0.10062131 | LOC100125556 | ALG1L     |   |
| chr3 | +(126295624..126296324) | 700  | 1.68843 | 11 | 4  | 7  | 0.2727273 | 0.003      | C3orf22      | TXNRD3IT1 |   |
| chr3 | +(126651322..126651860) | 538  | 0.18343 | 10 | 5  | 5  | 0         | 0.00451172 | CHCHD6       | PLXNA1    |   |
| chr3 | +(126726445..126727145) | 700  | 0.091   | 11 | 5  | 6  | 0.0909091 | 0.00308495 | PLXNA1       | TPRA1     |   |
| chr3 | +(126748512..126749666) | 1154 | 1.68843 | 15 | 7  | 8  | 0.0666667 | 0.94740374 | PLXNA1       | TPRA1     |   |
| chr3 | +(127509939..127510639) | 700  | 3.63011 | 10 | 6  | 4  | 0.2       | 0.995      | ABTB1        | MGLL      |   |
| chr3 | +(128119240..128119940) | 700  | 1.68843 | 12 | 5  | 7  | 0.1666667 | 0.99775837 | MIR1280      | DNAJB8    |   |
| chr3 | +(128627196..128627896) | 700  | 8.9E-05 | 20 | 14 | 6  | 0.4       | 0.000266   | ACAD9        | KIAA1257  |   |
| chr3 | +(128749423..128749957) | 534  | 3.63011 | 9  | 6  | 3  | 0.3333333 | 0.274      | CCDC48       | GP9       |   |
| chr3 | +(129152743..129153283) | 540  | 3.63011 | 9  | 4  | 5  | 0.1111111 | 0.032      | C3orf25      | MBD4      |   |
| chr3 | +(129275695..129276307) | 612  | 0.74291 | 9  | 3  | 6  | 0.3333333 | 0.024      | H1FOO        | PLXND1    |   |
| chr3 | +(129306096..129306796) | 700  | 0.36666 | 14 | 9  | 5  | 0.2857143 | 0.9986501  | H1FOO        | PLXND1    |   |
| chr3 | +(129338256..129338771) | 515  | 0.36666 | 10 | 4  | 6  | 0.2       | 0.057      | PLXND1       | TMCC1     | v |
| chr3 | +(129389545..129390048) | 503  | 3.63011 | 9  | 6  | 3  | 0.3333333 | 0.024      | PLXND1       | TMCC1     |   |
| chr3 | +(129818150..129818737) | 587  | 0.01005 | 20 | 14 | 6  | 0.4       | 0.40228547 | ALG1L2       | LOC729375 |   |
| chr3 | +(130107479..130108107) | 628  | 1.68843 | 10 | 4  | 6  | 0.2       | 0.086      | COL6A5       | COL6A6    |   |
| chr3 | +(130159385..130159915) | 530  | 3.63011 | 8  | 5  | 3  | 0.25      | 0.286      | COL6A5       | COL6A6    |   |
| chr3 | +(130345242..130345848) | 606  | 3.63011 | 12 | 6  | 6  | 0         | 0.01248734 | COL6A6       | PIK3R4    |   |
| chr3 | +(131220180..131220863) | 683  | 0.04455 | 15 | 5  | 10 | 0.3333333 | 0.00109982 | NUDT16       | MRPL3     |   |
| chr3 | +(132241731..132242249) | 518  | 1.68843 | 11 | 4  | 7  | 0.2727273 | 0.082      | DNAJC13      | ACAD11    |   |
| chr3 | +(132400298..132401216) | 918  | 0.36666 | 15 | 6  | 9  | 0.2       | 0.98305257 | UBA5         | NPHP3     |   |
| chr3 | +(133190826..133191495) | 669  | 3.63011 | 8  | 3  | 5  | 0.25      | 0.018      | BFSP2        | CDV3      |   |
| chr3 | +(133211128..133211650) | 522  | 0.74291 | 8  | 4  | 4  | 0         | 0.014      | BFSP2        | CDV3      |   |
| chr3 | +(133557649..133558349) | 700  | 0.36666 | 10 | 7  | 3  | 0.4       | 0.058      | SRPRB        | RAB6B     |   |
| chr3 | +(134080179..134080879) | 700  | 0.36666 | 11 | 4  | 7  | 0.2727273 | 0.003      | RYK          | AMOTL2    |   |
| chr3 | +(134644448..134644981) | 533  | 3.63011 | 7  | 4  | 3  | 0.1428571 | 0.029      | EPHB1        | PPP2R3A   | v |
| chr3 | +(135796928..135797561) | 633  | 0.04455 | 16 | 6  | 10 | 0.25      | 0.00056905 | PPP2R3A      | MSL2      | v |
| chr3 | +(136455425..136455942) | 517  | 3.63011 | 9  | 6  | 3  | 0.3333333 | 0.357      | PCCB         | STAG1     |   |
| chr3 | +(141274353..141274860) | 507  | 3.63011 | 10 | 4  | 6  | 0.2       | 0.005      | RASA2        | RNF7      |   |
| chr3 | +(141438233..141438933) | 700  | 1.68843 | 10 | 7  | 3  | 0.4       | 0.992      | RASA2        | RNF7      |   |

|      |                         |      |         |    |    |    |           |            |           |         |   |
|------|-------------------------|------|---------|----|----|----|-----------|------------|-----------|---------|---|
| chr3 | +(141905067..141905592) | 525  | 3.63011 | 9  | 5  | 4  | 0.1111111 | 0.016      | TFDP2     | GK5     |   |
| chr3 | +(142486147..142487544) | 1397 | 1.68843 | 14 | 7  | 7  | 0         | 0.99912744 | TRPC1     | PCOLCE2 |   |
| chr3 | +(142745574..142746080) | 506  | 3.63011 | 12 | 6  | 6  | 0         | 0.00520281 | SR140     | CHST2   |   |
| chr3 | +(143434807..143435667) | 860  | 0.00063 | 22 | 12 | 10 | 0.0909091 | 3.8063E-05 | CHST2     | SLC9A9  |   |
| chr3 | +(143692199..143692709) | 510  | 3.63011 | 6  | 4  | 2  | 0.3333333 | 0.067      | C3orf58   | PLOD2   |   |
| chr3 | +(146303701..146304203) | 502  | 3.63011 | 7  | 3  | 4  | 0.1428571 | 0.057      | PLSCR1    | PLSCR5  |   |
| chr3 | +(146962569..146963107) | 538  | 3.63011 | 6  | 3  | 3  | 0         | 0.05       | PLSCR5    | ZIC4    | v |
| chr3 | +(147111503..147112200) | 697  | 3.63011 | 9  | 6  | 3  | 0.3333333 | 0.988      | PLSCR5    | ZIC4    | v |
| chr3 | +(148552243..148552943) | 700  | 0.18343 | 16 | 10 | 6  | 0.25      | 0.99538163 | CPB1      | CPA3    | v |
| chr3 | +(151160258..151160957) | 699  | 3.63011 | 10 | 7  | 3  | 0.4       | 0.058      | P2RY12    | IGSF10  |   |
| chr3 | +(151164593..151165113) | 520  | 0.18343 | 12 | 8  | 4  | 0.3333333 | 0.99671074 | P2RY12    | IGSF10  |   |
| chr3 | +(152255412..152256110) | 698  | 0.091   | 11 | 6  | 5  | 0.0909091 | 0.00308495 | TMEM14E   | P2RY1   |   |
| chr3 | +(152553725..152554277) | 552  | 3.63011 | 10 | 4  | 6  | 0.2       | 0.005      | P2RY1     | RAP2B   |   |
| chr3 | +(152846744..152847252) | 508  | 3.63011 | 6  | 3  | 3  | 0         | 0.05       | P2RY1     | RAP2B   |   |
| chr3 | +(155545697..155546218) | 521  | 3.63011 | 12 | 6  | 6  | 0         | 0.0186865  | C3orf33   | SLC33A1 |   |
| chr3 | +(156893884..156894444) | 560  | 0.36666 | 9  | 5  | 4  | 0.1111111 | 0.008      | CCNL1     | VEPH1   |   |
| chr3 | +(157081810..157082328) | 518  | 3.63011 | 12 | 6  | 6  | 0         | 0.21166982 | CCNL1     | VEPH1   |   |
| chr3 | +(164410632..164411249) | 617  | 3.63011 | 6  | 2  | 4  | 0.3333333 | 0.067      | LOC647107 | SI      |   |
| chr3 | +(164756774..164757316) | 542  | 3.63011 | 9  | 6  | 3  | 0.3333333 | 0.012      | LOC647107 | SI      |   |
| chr3 | +(170744203..170744704) | 501  | 1.68843 | 9  | 5  | 4  | 0.1111111 | 0.008      | EIF5A2    | SLC2A2  |   |
| chr3 | +(171057052..171057986) | 934  | 0.18343 | 16 | 6  | 10 | 0.25      | 0.00056905 | SLC2A2    | TNIK    |   |
| chr3 | +(171332125..171332825) | 700  | 0.04455 | 12 | 7  | 5  | 0.1666667 | 0.00224163 | MIR569    | PLD1    |   |
| chr3 | +(179407653..179408257) | 604  | 3.63011 | 11 | 5  | 6  | 0.0909091 | 0.05017413 | USP13     | PEX5L   |   |
| chr3 | +(180702263..180702836) | 573  | 0.74291 | 9  | 4  | 5  | 0.1111111 | 0.032      | FXR1      | DNAJC19 |   |
| chr3 | +(183029232..183029870) | 638  | 3.63011 | 10 | 6  | 4  | 0.2       | 0.033      | LAMP3     | MCF2L2  |   |
| chr3 | +(183056439..183056952) | 513  | 3.63011 | 6  | 4  | 2  | 0.3333333 | 0.067      | LAMP3     | MCF2L2  |   |
| chr3 | +(183209950..183210601) | 651  | 3.63011 | 9  | 3  | 6  | 0.3333333 | 0.024      | B3GNT5    | KLHL6   |   |
| chr3 | +(183682791..183683295) | 504  | 0.74291 | 15 | 9  | 6  | 0.2       | 0.31867594 | PARL      | ABCC5   |   |
| chr3 | +(184069346..184070568) | 1222 | 0.04455 | 19 | 7  | 12 | 0.2631579 | 0.99980713 | FAM131A   | CLCN2   |   |
| chr3 | +(184071289..184071971) | 682  | 1.68843 | 8  | 4  | 4  | 0         | 0.171      | FAM131A   | CLCN2   |   |
| chr3 | +(184297309..184297862) | 553  | 3.63011 | 6  | 2  | 4  | 0.3333333 | 0.067      | EPHB3     | MAGEF1  |   |
| chr3 | +(184612437..184612942) | 505  | 3.63011 | 7  | 4  | 3  | 0.1428571 | 0.029      | VPS8      | C3orf70 |   |
| chr3 | +(184963528..184964214) | 686  | 0.74291 | 9  | 5  | 4  | 0.1111111 | 0.016      | C3orf70   | EHHADH  |   |
| chr3 | +(188423467..188424167) | 700  | 0.18343 | 10 | 4  | 6  | 0.2       | 0.005      | FLJ42393  | TPRG1   |   |

|      |                         |      |         |    |    |    |           |            |           |          |
|------|-------------------------|------|---------|----|----|----|-----------|------------|-----------|----------|
| chr3 | +(194083912..194084424) | 512  | 3.63011 | 8  | 4  | 4  | 0         | 0.014      | CPN2      | LRRC15   |
| chr3 | +(195438833..195439416) | 583  | 3.63011 | 9  | 6  | 3  | 0.3333333 | 0.012      | MIR570    | MUC20    |
| chr3 | +(195447527..195448028) | 501  | 3.63011 | 9  | 3  | 6  | 0.3333333 | 0.131      | MIR570    | MUC20    |
| chr3 | +(195506741..195507268) | 527  | 2.38872 | 34 | 18 | 16 | 0.0588235 | 0.15851131 | MUC20     | MUC4     |
| chr3 | +(195507762..195508293) | 531  | 2.57182 | 34 | 20 | 14 | 0.1764706 | 0.00715294 | MUC20     | MUC4     |
| chr3 | +(195512800..195513393) | 593  | 0.87094 | 53 | 35 | 18 | 0.3207547 | 0.19381167 | MUC20     | MUC4     |
| chr3 | +(195664573..195665115) | 542  | 3.63011 | 9  | 4  | 5  | 0.1111111 | 0.008      | TNK2      | SDHAP1   |
| chr3 | +(195691938..195692443) | 505  | 3.63011 | 9  | 3  | 6  | 0.3333333 | 0.012      | TNK2      | SDHAP1   |
| chr3 | +(195954793..195955401) | 608  | 0.74291 | 13 | 7  | 6  | 0.0769231 | 0.84134475 | OSTalpha  | PCYT1A   |
| chr3 | +(196385655..196386355) | 700  | 0.18343 | 15 | 5  | 10 | 0.3333333 | 0.99890018 | LRRC33    | C3orf34  |
| chr3 | +(197836701..197837228) | 527  | 3.63011 | 9  | 3  | 6  | 0.3333333 | 0.012      | LOC348840 | FAM157A  |
| chr3 | +(197847041..197847673) | 632  | 1.68843 | 12 | 4  | 8  | 0.3333333 | 0.285      | LOC348840 | FAM157A  |
| chr3 | +(197894388..197894982) | 594  | 3.39201 | 49 | 19 | 30 | 0.2244898 | 5.2068E-07 | FAM157A   |          |
| chr4 | +(337427..338121)       | 694  | 0.14315 | 14 | 8  | 6  | 0.1428571 | 0.00225435 | ZNF141    | ABCA11P  |
| chr4 | +(420377..420974)       | 597  | 1.42588 | 9  | 5  | 4  | 0.1111111 | 0.016      | ZNF141    | ABCA11P  |
| chr4 | +(515507..516079)       | 572  | 0.64584 | 16 | 8  | 8  | 0         | 0.6236431  | PIGG      | PDE6B    |
| chr4 | +(524116..524769)       | 653  | 1.42588 | 10 | 7  | 3  | 0.4       | 0.033      | PIGG      | PDE6B    |
| chr4 | +(884268..885250)       | 982  | 0.64584 | 15 | 10 | 5  | 0.3333333 | 0.88966432 | CPLX1     | GAK      |
| chr4 | +(905379..906933)       | 1554 | 0.32738 | 24 | 8  | 16 | 0.3333333 | 0.99995558 | CPLX1     | GAK      |
| chr4 | +(1074949..1075595)     | 646  | 1.42588 | 10 | 3  | 7  | 0.4       | 0.333      | FGFRL1    | RNF212   |
| chr4 | +(1186782..1187426)     | 644  | 3.26113 | 6  | 2  | 4  | 0.3333333 | 0.067      | TMED11P   | SPON2    |
| chr4 | +(1283869..1284569)     | 700  | 0.64584 | 13 | 5  | 8  | 0.2307692 | 0.9982926  | MAEA      | KIAA1530 |
| chr4 | +(1310139..1310862)     | 723  | 0.00937 | 17 | 7  | 10 | 0.1764706 | 0.08592868 | MAEA      | KIAA1530 |
| chr4 | +(1348360..1348871)     | 511  | 1.42588 | 7  | 3  | 4  | 0.1428571 | 0.029      | KIAA1530  | CRIPAK   |
| chr4 | +(1374267..1374901)     | 634  | 1.42588 | 7  | 3  | 4  | 0.1428571 | 0.029      | KIAA1530  | CRIPAK   |
| chr4 | +(1387971..1388614)     | 643  | 0.03083 | 23 | 10 | 13 | 0.1304348 | 0.94656814 | CRIPAK    | FAM53A   |
| chr4 | +(1482400..1483100)     | 700  | 0.32738 | 9  | 6  | 3  | 0.3333333 | 0.012      | CRIPAK    | FAM53A   |
| chr4 | +(1619538..1620110)     | 572  | 3.26113 | 7  | 3  | 4  | 0.1428571 | 0.029      | CRIPAK    | FAM53A   |
| chr4 | +(1734044..1734744)     | 700  | 1.42588 | 11 | 4  | 7  | 0.2727273 | 0.997      | TACC3     | FGFR3    |
| chr4 | +(2410905..2411604)     | 699  | 0.32738 | 9  | 4  | 5  | 0.1111111 | 0.008      | MXD4      | ZFYVE28  |
| chr4 | +(2453206..2453811)     | 605  | 3.26113 | 6  | 3  | 3  | 0         | 0.05       | LOC402160 | RNF4     |
| chr4 | +(2701426..2701952)     | 526  | 3.26113 | 10 | 5  | 5  | 0         | 0.12529603 | FAM193A   | TNIP2    |
| chr4 | +(2830435..2831135)     | 700  | 0.02116 | 13 | 9  | 4  | 0.3846154 | 0.001      | SH3BP2    | ADD1     |
| chr4 | +(2931884..2932398)     | 514  | 3.26113 | 6  | 3  | 3  | 0         | 0.05       | ADD1      | MFSD10   |

|      |                       |      |         |    |    |    |           |            |            |            |
|------|-----------------------|------|---------|----|----|----|-----------|------------|------------|------------|
| chr4 | +(2934448..2934988)   | 540  | 3.26113 | 8  | 4  | 4  | 0         | 0.014      | ADD1       | MFSD10     |
| chr4 | +(2945603..2946200)   | 597  | 1.42588 | 9  | 3  | 6  | 0.3333333 | 0.012      | C4orf10    | NOP14      |
| chr4 | +(3134398..3135029)   | 631  | 0.14315 | 10 | 7  | 3  | 0.4       | 0.008      | HTT        | C4orf44    |
| chr4 | +(3225088..3225788)   | 700  | 0.14315 | 11 | 4  | 7  | 0.2727273 | 0.003      | HTT        | C4orf44    |
| chr4 | +(3439244..3439944)   | 700  | 0.06643 | 11 | 6  | 5  | 0.0909091 | 0.00308495 | RGS12      | HGFAC      |
| chr4 | +(3838267..3839121)   | 854  | 0.32738 | 16 | 11 | 5  | 0.375     | 0.97629081 | ADRA2C     | LOC348926  |
| chr4 | +(3944877..3945387)   | 510  | 1.42588 | 15 | 9  | 6  | 0.2       | 0.00073136 | ADRA2C     | LOC348926  |
| chr4 | +(4164142..4164750)   | 608  | 3.26113 | 6  | 2  | 4  | 0.3333333 | 0.067      | LOC348926  | OTOP1      |
| chr4 | +(4281019..4281536)   | 517  | 3.26113 | 10 | 7  | 3  | 0.4       | 0.133      | TMEM128    | LYAR       |
| chr4 | +(5627165..5627666)   | 501  | 3.26113 | 10 | 4  | 6  | 0.2       | 0.005      | C4orf6     | EVC2       |
| chr4 | +(5844361..5844883)   | 522  | 1.42588 | 7  | 4  | 3  | 0.1428571 | 0.029      | EVC        | CRMP1      |
| chr4 | +(6082682..6083955)   | 1273 | 1.42588 | 13 | 6  | 7  | 0.0769231 | 0.9986501  | CRMP1      | JAKMIP1    |
| chr4 | +(6149183..6149702)   | 519  | 1.42588 | 7  | 4  | 3  | 0.1428571 | 0.029      | CRMP1      | JAKMIP1    |
| chr4 | +(6586794..6587315)   | 521  | 1.42588 | 7  | 3  | 4  | 0.1428571 | 0.029      | MAN2B2     | MRFAP1     |
| chr4 | +(7770526..7771047)   | 521  | 1.42588 | 7  | 3  | 4  | 0.1428571 | 0.029      | AFAP1-AS1  | AFAP1      |
| chr4 | +(8051844..8052496)   | 652  | 0.06643 | 11 | 7  | 4  | 0.2727273 | 0.003      | AFAP1      | ABLIM2     |
| chr4 | +(8081232..8082406)   | 1174 | 0.64584 | 16 | 8  | 8  | 0         | 0.00038877 | AFAP1      | ABLIM2     |
| chr4 | +(8114090..8114776)   | 686  | 1.42588 | 10 | 7  | 3  | 0.4       | 0.992      | AFAP1      | ABLIM2     |
| chr4 | +(8178303..8178862)   | 559  | 1.42588 | 10 | 3  | 7  | 0.4       | 0.992      | ABLIM2     | SH3TC1     |
| chr4 | +(8220628..8221318)   | 690  | 0.06643 | 15 | 9  | 6  | 0.2       | 0.00921106 | SH3TC1     | HTRA3      |
| chr4 | +(8274082..8274785)   | 703  | 0.00937 | 14 | 8  | 6  | 0.1428571 | 0.00097289 | HTRA3      | ACOX3      |
| chr4 | +(8279229..8280228)   | 999  | 0.64584 | 14 | 8  | 6  | 0.1428571 | 0.00097289 | HTRA3      | ACOX3      |
| chr4 | +(9261120..9261645)   | 525  | 3.26113 | 12 | 7  | 5  | 0.1666667 | 0.18587565 | USP17_dup3 | USP17_dup4 |
| chr4 | +(9265318..9265948)   | 630  | 0.64584 | 20 | 7  | 13 | 0.3       | 0.00050347 | USP17_dup3 | USP17_dup4 |
| chr4 | +(9269287..9269870)   | 583  | 3.26113 | 11 | 5  | 6  | 0.0909091 | 0.18065522 | USP17_dup3 | USP17_dup4 |
| chr4 | +(9327730..9328231)   | 501  | 4.06502 | 27 | 18 | 9  | 0.3333333 | 0.01982494 | USP17_dup4 | USP17_dup5 |
| chr4 | +(9342188..9342849)   | 661  | 0.97025 | 21 | 8  | 13 | 0.2380952 | 0.00092257 | USP17_dup6 | USP17_dup7 |
| chr4 | +(9345886..9346406)   | 520  | 3.26113 | 12 | 8  | 4  | 0.3333333 | 0.024      | USP17_dup6 | USP17_dup7 |
| chr4 | +(9347144..9347677)   | 533  | 1.42588 | 10 | 5  | 5  | 0         | 0.05859256 | USP17_dup6 | USP17_dup7 |
| chr4 | +(9365731..9366239)   | 508  | 1.42588 | 18 | 9  | 9  | 0         | 0.13484495 | USP17_dup9 | USP17L6P   |
| chr4 | +(9945245..9946090)   | 845  | 0.00937 | 14 | 6  | 8  | 0.1428571 | 0.00097289 | DRD5       | SLC2A9     |
| chr4 | +(13612537..13613145) | 608  | 1.42588 | 13 | 7  | 6  | 0.0769231 | 0.0013499  | LOC285548  | BOD1L      |
| chr4 | +(16504049..16504749) | 700  | 0.32738 | 12 | 8  | 4  | 0.3333333 | 0.008      | FLJ39653   | LDB2       |
| chr4 | +(17624988..17625561) | 573  | 3.26113 | 8  | 3  | 5  | 0.25      | 0.071      | MED28      | FAM184B    |

|      |                       |     |         |    |    |    |           |            |              |           |
|------|-----------------------|-----|---------|----|----|----|-----------|------------|--------------|-----------|
| chr4 | +(17816375..17817007) | 632 | 0.64584 | 11 | 7  | 4  | 0.2727273 | 0.012      | NCAPG        | LCORL     |
| chr4 | +(17842035..17842537) | 502 | 3.26113 | 8  | 4  | 4  | 0         | 0.014      | NCAPG        | LCORL     |
| chr4 | +(17885491..17886016) | 525 | 1.42588 | 15 | 5  | 10 | 0.3333333 | 0.9669037  | NCAPG        | LCORL     |
| chr4 | +(17964401..17965049) | 648 | 0.14315 | 14 | 7  | 7  | 0         | 0.00300561 | NCAPG        | LCORL     |
| chr4 | +(39846051..39846639) | 588 | 0.64584 | 9  | 6  | 3  | 0.3333333 | 0.012      | UBE2K        | PDS5A     |
| chr4 | +(40034993..40035505) | 512 | 0.14315 | 10 | 5  | 5  | 0         | 0.00451172 | PDS5A        | LOC344967 |
| chr4 | +(40788192..40788710) | 518 | 0.14315 | 20 | 9  | 11 | 0.1       | 0.15252943 | NSUN7        | APBB2     |
| chr4 | +(42582969..42583669) | 700 | 3.26113 | 10 | 4  | 6  | 0.2       | 0.995      | SHISA3       | ATP8A1    |
| chr4 | +(47601408..47601930) | 522 | 3.26113 | 6  | 3  | 3  | 0         | 0.05       | ATP10D       | CORIN     |
| chr4 | +(48529767..48530271) | 504 | 3.26113 | 7  | 3  | 4  | 0.1428571 | 0.2        | ZAR1         | FRYL      |
| chr4 | +(54384989..54385626) | 637 | 1.42588 | 7  | 3  | 4  | 0.1428571 | 0.029      | FIP1L1       | LNX1      |
| chr4 | +(56229952..56230572) | 620 | 0.64584 | 16 | 9  | 7  | 0.125     | 0.11174712 | SRD5A3       | TMEM165   |
| chr4 | +(57302720..57303373) | 653 | 0.00501 | 15 | 8  | 7  | 0.0666667 | 0.00059687 | PAICS        | SRP72     |
| chr4 | +(57352321..57352847) | 526 | 3.26113 | 6  | 3  | 3  | 0         | 0.05       | SRP72        | ARL9      |
| chr4 | +(59663327..59664027) | 700 | 0.64584 | 13 | 8  | 5  | 0.2307692 | 0.0017074  | LOC255130    | LPHN3     |
| chr4 | +(62935984..62936665) | 681 | 1.42588 | 9  | 4  | 5  | 0.1111111 | 0.032      | LPHN3        | TECRL     |
| chr4 | +(68338080..68338590) | 510 | 3.26113 | 7  | 3  | 4  | 0.1428571 | 0.029      | LOC100144602 | CENPC1    |
| chr4 | +(68377804..68378311) | 507 | 3.26113 | 11 | 5  | 6  | 0.0909091 | 0.5        | LOC100144602 | CENPC1    |
| chr4 | +(68384881..68385445) | 564 | 1.42588 | 12 | 5  | 7  | 0.1666667 | 0.06144014 | LOC100144602 | CENPC1    |
| chr4 | +(69362003..69362917) | 914 | 3.26113 | 14 | 7  | 7  | 0         | 0.2826494  | TMPRSS11E    | UGT2B17   |
| chr4 | +(71274923..71275451) | 528 | 3.26113 | 9  | 4  | 5  | 0.1111111 | 0.032      | PROL1        | MUC7      |
| chr4 | +(71346784..71347353) | 569 | 0.25864 | 40 | 19 | 21 | 0.05      | 0.58048319 | MUC7         | AMTN      |
| chr4 | +(72338234..72338888) | 654 | 0.64584 | 9  | 3  | 6  | 0.3333333 | 0.012      | SLC4A4       | GC        |
| chr4 | +(74285694..74286267) | 573 | 3.26113 | 6  | 2  | 4  | 0.3333333 | 0.067      | ALB          | AFP       |
| chr4 | +(75484662..75485212) | 550 | 1.42588 | 10 | 7  | 3  | 0.4       | 0.258      | AREG_dup2    | BTC       |
| chr4 | +(75675614..75676190) | 576 | 0.64584 | 9  | 5  | 4  | 0.1111111 | 0.008      | AREG_dup2    | BTC       |
| chr4 | +(78808198..78808728) | 530 | 3.26113 | 7  | 3  | 4  | 0.1428571 | 0.029      | MRPL1        | FRAS1     |
| chr4 | +(79102219..79102722) | 503 | 3.26113 | 14 | 9  | 5  | 0.2857143 | 0.63055866 | FRAS1        | ANXA3     |
| chr4 | +(79202119..79202731) | 612 | 1.42588 | 11 | 4  | 7  | 0.2727273 | 0.464      | FRAS1        | ANXA3     |
| chr4 | +(79368898..79369651) | 753 | 0.64584 | 13 | 6  | 7  | 0.0769231 | 0.005064   | FRAS1        | ANXA3     |
| chr4 | +(83680099..83680682) | 583 | 3.26113 | 6  | 2  | 4  | 0.3333333 | 0.067      | C4orf11      | SCD5      |
| chr4 | +(84190844..84191401) | 557 | 0.64584 | 10 | 7  | 3  | 0.4       | 0.033      | PLAC8        | COQ2      |
| chr4 | +(84383464..84384253) | 789 | 0.00032 | 28 | 15 | 13 | 0.0714286 | 5.9919E-05 | MRPS18C      | FAM175A   |
| chr4 | +(87666206..87666716) | 510 | 3.26113 | 11 | 6  | 5  | 0.0909091 | 0.01422987 | PTPN13       | SLC10A6   |

|      |                         |      |         |     |    |    |           |            |              |          |
|------|-------------------------|------|---------|-----|----|----|-----------|------------|--------------|----------|
| chr4 | +(88278281..88278782)   | 501  | 3.26113 | 7   | 4  | 3  | 0.1428571 | 0.029      | HSD17B13     | HSD17B11 |
| chr4 | +(88310287..88310888)   | 601  | 3.26113 | 6   | 3  | 3  | 0         | 0.05       | HSD17B13     | HSD17B11 |
| chr4 | +(88535180..88535705)   | 525  | 4.06502 | 27  | 10 | 17 | 0.2592593 | 0.04389915 | DSPP         | DMP1     |
| chr4 | +(88536358..88537243)   | 885  | 0.10874 | 146 | 90 | 56 | 0.2328767 | 0.9407998  | DSPP         | DMP1     |
| chr4 | +(88537382..88538061)   | 679  | 0.18652 | 43  | 29 | 14 | 0.3488372 | 0.07700791 | DSPP         | DMP1     |
| chr4 | +(88978943..88979449)   | 506  | 3.26113 | 10  | 4  | 6  | 0.2       | 0.033      | PKD2         | ABCG2    |
| chr4 | +(92108734..92109259)   | 525  | 3.26113 | 6   | 2  | 4  | 0.3333333 | 0.067      | TMSL3        | GRID2    |
| chr4 | +(100273675..100274185) | 510  | 1.42588 | 11  | 6  | 5  | 0.0909091 | 0.02230486 | ADH1B        | ADH1C    |
| chr4 | +(100450840..100451540) | 700  | 3.26113 | 11  | 6  | 5  | 0.0909091 | 0.10062131 | C4orf17      | RG9MTD2  |
| chr4 | +(100851493..100852002) | 509  | 3.26113 | 9   | 4  | 5  | 0.1111111 | 0.016      | MAPKSP1      | DNAJB14  |
| chr4 | +(100867498..100868006) | 508  | 3.26113 | 6   | 4  | 2  | 0.3333333 | 0.067      | MAPKSP1      | DNAJB14  |
| chr4 | +(102019339..102019886) | 547  | 0.32738 | 15  | 10 | 5  | 0.3333333 | 0.01374317 | EMCN         | PPP3CA   |
| chr4 | +(103555695..103556395) | 700  | 0.14315 | 13  | 9  | 4  | 0.3846154 | 0.01       | NFKB1        | MANBA    |
| chr4 | +(103610394..103611057) | 663  | 1.42588 | 11  | 4  | 7  | 0.2727273 | 0.003      | NFKB1        | MANBA    |
| chr4 | +(103910797..103911369) | 572  | 1.42588 | 8   | 5  | 3  | 0.25      | 0.018      | CISD2        | NHEDC1   |
| chr4 | +(104070075..104070593) | 518  | 3.26113 | 9   | 4  | 5  | 0.1111111 | 0.056      | BDH2         | CENPE    |
| chr4 | +(106159215..106159724) | 509  | 3.26113 | 11  | 6  | 5  | 0.0909091 | 0.42756607 | TET2         | PPA2     |
| chr4 | +(106317174..106317692) | 518  | 3.26113 | 6   | 2  | 4  | 0.3333333 | 0.067      | TET2         | PPA2     |
| chr4 | +(109588104..109588644) | 540  | 0.64584 | 15  | 8  | 7  | 0.0666667 | 0.00388698 | OSTC         | AGXT2L1  |
| chr4 | +(120176589..120177176) | 587  | 1.42588 | 7   | 4  | 3  | 0.1428571 | 0.029      | USP53        | C4orf3   |
| chr4 | +(120194618..120195129) | 511  | 3.26113 | 12  | 5  | 7  | 0.1666667 | 0.18587565 | USP53        | C4orf3   |
| chr4 | +(122774004..122774544) | 540  | 1.42588 | 9   | 6  | 3  | 0.3333333 | 0.012      | CCNA2        | BBS7     |
| chr4 | +(123855131..123855679) | 548  | 3.26113 | 7   | 4  | 3  | 0.1428571 | 0.114      | SPATA5       | SPRY1    |
| chr4 | +(130030210..130030752) | 542  | 3.26113 | 7   | 3  | 4  | 0.1428571 | 0.029      | C4orf33      | PCDH10   |
| chr4 | +(139992602..139993375) | 773  | 3.26113 | 12  | 6  | 6  | 0         | 0.00815459 | CCRN4L       | ELF2     |
| chr4 | +(141300346..141300879) | 533  | 3.26113 | 13  | 5  | 8  | 0.2307692 | 0.27909232 | LOC100129858 | CLGN     |
| chr4 | +(141448425..141448974) | 549  | 3.26113 | 9   | 4  | 5  | 0.1111111 | 0.056      | ELMOD2       | UCP1     |
| chr4 | +(144940420..144940923) | 503  | 3.26113 | 13  | 6  | 7  | 0.0769231 | 0.01606229 | GYPE         | GYPB     |
| chr4 | +(145061806..145062323) | 517  | 0.64584 | 16  | 8  | 8  | 0         | 0.02935371 | GYPB         | GYPB     |
| chr4 | +(145561103..145562113) | 1010 | 0.64584 | 15  | 8  | 7  | 0.0666667 | 0.00059687 | GYPB         | GYPB     |
| chr4 | +(145567665..145568191) | 526  | 1.42588 | 9   | 4  | 5  | 0.1111111 | 0.008      | HHIP         | HHIP     |
| chr4 | +(145567665..145568191) | 526  | 1.42588 | 9   | 4  | 5  | 0.1111111 | 0.008      | HHIP         | ANAPC10  |
| chr4 | +(148809222..148810455) | 1233 | 0.06643 | 17  | 11 | 6  | 0.2941176 | 0.00045556 | ARHGAP10     | NR3C2    |
| chr4 | +(151829397..151829929) | 532  | 3.26113 | 9   | 5  | 4  | 0.1111111 | 0.056      | DCLK2        | LRBA     |
| chr4 | +(152096031..152096536) | 505  | 3.26113 | 13  | 8  | 5  | 0.2307692 | 0.98594598 | SNORD73A     | SH3D19   |

|      |                         |     |         |    |    |    |           |            |          |           |
|------|-------------------------|-----|---------|----|----|----|-----------|------------|----------|-----------|
| chr4 | +(152179715..152180521) | 806 | 0.00501 | 15 | 8  | 7  | 0.0666667 | 0.00059687 | SH3D19   | PRSS48    |
| chr4 | +(153332209..153332961) | 752 | 0.32738 | 19 | 8  | 11 | 0.1578947 | 0.01949431 | PET112L  | FBXW7     |
| chr4 | +(153897901..153898601) | 700 | 1.42588 | 10 | 7  | 3  | 0.4       | 0.008      | FHDC1    | TRIM2     |
| chr4 | +(154556486..154557186) | 700 | 1.42588 | 13 | 7  | 6  | 0.0769231 | 0.005064   | KIAA0922 | TLR2      |
| chr4 | +(155241567..155242196) | 629 | 1.42588 | 11 | 4  | 7  | 0.2727273 | 0.021      | SFRP2    | DCHS2     |
| chr4 | +(157693576..157694243) | 667 | 1.42588 | 9  | 3  | 6  | 0.3333333 | 0.726      | CTSO     | PDGFC     |
| chr4 | +(157731822..157732421) | 599 | 1.42588 | 8  | 4  | 4  | 0         | 0.014      | CTSO     | PDGFC     |
| chr4 | +(164085423..164085982) | 559 | 3.26113 | 10 | 6  | 4  | 0.2       | 0.176      | FSTL5    | NAF1      |
| chr4 | +(164440371..164440979) | 608 | 1.42588 | 8  | 5  | 3  | 0.25      | 0.071      | C4orf43  | 40969     |
| chr4 | +(165110796..165111347) | 551 | 3.26113 | 10 | 7  | 3  | 0.4       | 0.258      | C4orf43  | 40969     |
| chr4 | +(165848712..165849263) | 551 | 1.42588 | 13 | 6  | 7  | 0.0769231 | 0.05804158 | ANP32C   | TRIM61    |
| chr4 | +(165879919..165880437) | 518 | 3.26113 | 10 | 6  | 4  | 0.2       | 0.086      | ANP32C   | TRIM61    |
| chr4 | +(166199839..166200594) | 755 | 1.42588 | 17 | 11 | 6  | 0.2941176 | 0.34383645 | KLHL2    | GK3P      |
| chr4 | +(166200602..166201144) | 542 | 0.32738 | 16 | 9  | 7  | 0.125     | 0.88825288 | KLHL2    | GK3P      |
| chr4 | +(166232529..166233039) | 510 | 1.42588 | 14 | 8  | 6  | 0.1428571 | 0.01943355 | GK3P     | SC4MOL    |
| chr4 | +(169085110..169085645) | 535 | 3.26113 | 8  | 4  | 4  | 0         | 0.014      | ANXA10   | DDX60     |
| chr4 | +(169095320..169096008) | 688 | 0.64584 | 8  | 4  | 4  | 0         | 0.014      | ANXA10   | DDX60     |
| chr4 | +(170601068..170601575) | 507 | 1.42588 | 11 | 5  | 6  | 0.0909091 | 0.00529357 | CLCN3    | C4orf27   |
| chr4 | +(173301214..173301723) | 509 | 3.26113 | 9  | 5  | 4  | 0.1111111 | 0.095      | GALNTL6  | GALNT7    |
| chr4 | +(184588212..184588721) | 509 | 1.42588 | 10 | 7  | 3  | 0.4       | 0.033      | C4orf41  | STOX2     |
| chr4 | +(184728717..184729266) | 549 | 0.32738 | 11 | 7  | 4  | 0.2727273 | 0.158      | C4orf41  | STOX2     |
| chr4 | +(184931991..184932691) | 700 | 0.00937 | 21 | 14 | 7  | 0.3333333 | 0.00288676 | STOX2    | ENPP6     |
| chr4 | +(185606481..185607103) | 622 | 0.32738 | 17 | 11 | 6  | 0.2941176 | 0.06583401 | CCDC111  | MLF1IP    |
| chr4 | +(185634084..185634743) | 659 | 0.64584 | 8  | 4  | 4  | 0         | 0.014      | CCDC111  | MLF1IP    |
| chr4 | +(186111454..186111965) | 511 | 3.26113 | 10 | 5  | 5  | 0         | 0.00451172 | SLC25A4  | KIAA1430  |
| chr4 | +(186510810..186511326) | 516 | 3.26113 | 8  | 5  | 3  | 0.25      | 0.286      | PDLIM3   | SORBS2    |
| chr4 | +(186536000..186536528) | 528 | 0.32738 | 12 | 8  | 4  | 0.3333333 | 0.014      | PDLIM3   | SORBS2    |
| chr4 | +(186544686..186545263) | 577 | 3.26113 | 6  | 4  | 2  | 0.3333333 | 0.067      | PDLIM3   | SORBS2    |
| chr4 | +(186598120..186598630) | 510 | 1.42588 | 10 | 5  | 5  | 0         | 0.0081468  | PDLIM3   | SORBS2    |
| chr4 | +(186999866..187000432) | 566 | 1.42588 | 8  | 3  | 5  | 0.25      | 0.018      | TLR3     | FAM149A   |
| chr4 | +(187074560..187075107) | 547 | 0.14315 | 13 | 9  | 4  | 0.3846154 | 0.001      | FAM149A  | CYP4V2    |
| chr4 | +(187350999..187351699) | 700 | 0.14315 | 10 | 7  | 3  | 0.4       | 0.008      | F11      | LOC285441 |
| chr4 | +(188925856..188926556) | 700 | 0.14315 | 12 | 8  | 4  | 0.3333333 | 0.024      | ZFP42    | TRIML2    |
| chr4 | +(190873360..190873864) | 504 | 1.42588 | 12 | 7  | 5  | 0.1666667 | 0.34237168 | FRG1     | TUBB4Q    |



|      |                         |     |         |    |    |    |           |            |              |              |
|------|-------------------------|-----|---------|----|----|----|-----------|------------|--------------|--------------|
| chr4 | +(190878291..190878972) | 681 | 0.06889 | 39 | 23 | 16 | 0.1794872 | 2.1444E-06 | FRG1         | TUBB4Q       |
| chr5 | +(154635..155335)       | 700 | 0.05995 | 13 | 6  | 7  | 0.0769231 | 0.00332094 | PLEKHG4B     | LRRC14B      |
| chr5 | +(223220..223731)       | 511 | 0.01049 | 19 | 6  | 13 | 0.3684211 | 0.0003125  | SDHA         | PDCD6        |
| chr5 | +(231083..231703)       | 620 | 2.83731 | 9  | 6  | 3  | 0.3333333 | 0.869      | SDHA         | PDCD6        |
| chr5 | +(319126..319641)       | 515 | 0.26306 | 9  | 5  | 4  | 0.1111111 | 0.008      | AHRR         | LOC100310782 |
| chr5 | +(427426..428126)       | 700 | 1.33407 | 9  | 4  | 5  | 0.1111111 | 0.008      | LOC100310782 | C5orf55      |
| chr5 | +(479581..480256)       | 675 | 0.26306 | 10 | 5  | 5  | 0         | 0.01414006 | LOC25845     | SLC9A3       |
| chr5 | +(509817..510722)       | 905 | 0.61213 | 15 | 8  | 7  | 0.0666667 | 0.00059687 | LOC25845     | SLC9A3       |
| chr5 | +(557870..558570)       | 700 | 1.33407 | 12 | 5  | 7  | 0.1666667 | 0.00224163 | SLC9A3       | CEP72        |
| chr5 | +(627637..628310)       | 673 | 0.11662 | 10 | 5  | 5  | 0         | 0.00451172 | CEP72        | TPPP         |
| chr5 | +(665301..665956)       | 655 | 0.11662 | 11 | 7  | 4  | 0.2727273 | 0.082      | CEP72        | TPPP         |
| chr5 | +(685378..686078)       | 700 | 0.61213 | 12 | 8  | 4  | 0.3333333 | 0.976      | CEP72        | TPPP         |
| chr5 | +(825047..825734)       | 687 | 0.26306 | 9  | 6  | 3  | 0.3333333 | 0.012      | TPPP         | ZDHHC11      |
| chr5 | +(886582..887136)       | 554 | 2.83731 | 8  | 5  | 3  | 0.25      | 0.125      | ZDHHC11      | BRD9         |
| chr5 | +(992369..992938)       | 569 | 0.61213 | 8  | 3  | 5  | 0.25      | 0.018      | TRIP13       | NKD2         |
| chr5 | +(1010727..1011427)     | 700 | 0.11662 | 10 | 4  | 6  | 0.2       | 0.005      | NKD2         | SLC12A7      |
| chr5 | +(1068926..1069626)     | 700 | 2.83731 | 10 | 4  | 6  | 0.2       | 0.005      | NKD2         | SLC12A7      |
| chr5 | +(1101178..1101878)     | 700 | 0.02552 | 12 | 7  | 5  | 0.1666667 | 0.00224163 | NKD2         | SLC12A7      |
| chr5 | +(1167853..1168547)     | 694 | 2.83731 | 10 | 4  | 6  | 0.2       | 0.995      | SLC12A7      | SLC6A19      |
| chr5 | +(1226315..1226932)     | 617 | 2.83731 | 8  | 3  | 5  | 0.25      | 0.018      | SLC6A18      | TERT         |
| chr5 | +(1230968..1231831)     | 863 | 0.05995 | 14 | 7  | 7  | 0         | 0.08985625 | SLC6A18      | TERT         |
| chr5 | +(1240260..1240836)     | 576 | 0.26306 | 12 | 8  | 4  | 0.3333333 | 0.533      | SLC6A18      | TERT         |
| chr5 | +(1271259..1271846)     | 587 | 0.11662 | 15 | 8  | 7  | 0.0666667 | 0.00059687 | SLC6A18      | TERT         |
| chr5 | +(1282022..1282737)     | 715 | 3E-07   | 27 | 10 | 17 | 0.2592593 | 9.8696E-06 | SLC6A18      | TERT         |
| chr5 | +(1393018..1393636)     | 618 | 0.61213 | 8  | 5  | 3  | 0.25      | 0.018      | CLPTM1L      | SLC6A3       |
| chr5 | +(1493069..1493997)     | 928 | 0.26306 | 16 | 6  | 10 | 0.25      | 0.00056905 | SLC6A3       | LPCAT1       |
| chr5 | +(1509328..1509836)     | 508 | 2.83731 | 9  | 5  | 4  | 0.1111111 | 0.008      | SLC6A3       | LPCAT1       |
| chr5 | +(1570050..1570673)     | 623 | 2.39506 | 13 | 7  | 6  | 0.0769231 | 0.0013499  | LPCAT1       | SDHAP3       |
| chr5 | +(1626668..1627291)     | 623 | 2.83731 | 6  | 2  | 4  | 0.3333333 | 0.067      | SDHAP3       | LOC728613    |
| chr5 | +(4648371..4649071)     | 700 | 1.33407 | 11 | 4  | 7  | 0.2727273 | 0.997      | IRX1         | LOC340094    |
| chr5 | +(5034624..5035324)     | 700 | 0.01049 | 16 | 9  | 7  | 0.125     | 0.31691947 | LOC340094    | ADAMTS16     |
| chr5 | +(6235935..6236635)     | 700 | 0.05995 | 11 | 5  | 6  | 0.0909091 | 0.00308495 | KIAA0947     | FLJ33360     |
| chr5 | +(6319040..6319740)     | 700 | 0.11662 | 10 | 4  | 6  | 0.2       | 0.005      | KIAA0947     | FLJ33360     |
| chr5 | +(6361250..6361950)     | 700 | 0.00503 | 14 | 9  | 5  | 0.2857143 | 0.0013499  | FLJ33360     | MED10        |

|      |                       |      |         |    |    |    |           |            |           |           |   |
|------|-----------------------|------|---------|----|----|----|-----------|------------|-----------|-----------|---|
| chr5 | +(6491376..6492006)   | 630  | 0.00503 | 14 | 6  | 8  | 0.1428571 | 0.00097289 | UBE2QL1   | LOC255167 |   |
| chr5 | +(6609699..6610321)   | 622  | 1.33407 | 10 | 5  | 5  | 0         | 0.00451172 | LOC255167 | NSUN2     |   |
| chr5 | +(7599020..7599720)   | 700  | 0.02552 | 12 | 7  | 5  | 0.1666667 | 0.00224163 | ADCY2     | C5orf49   |   |
| chr5 | +(9630017..9630711)   | 694  | 0.26306 | 23 | 7  | 16 | 0.3913043 | 0.1425247  | SNORD123  | TAS2R1    |   |
| chr5 | +(11240317..11240992) | 675  | 0.26306 | 10 | 4  | 6  | 0.2       | 0.005      | DAP       | CTNND2    |   |
| chr5 | +(12292420..12292992) | 572  | 0.61213 | 8  | 5  | 3  | 0.25      | 0.018      | CTNND2    | TAG       |   |
| chr5 | +(12488527..12489127) | 600  | 2.83731 | 6  | 3  | 3  | 0         | 0.05       | CTNND2    | TAG       |   |
| chr5 | +(14359106..14359640) | 534  | 1.33407 | 10 | 3  | 7  | 0.4       | 0.008      | TRIO      | FAM105A   |   |
| chr5 | +(14703163..14704283) | 1120 | 0.61213 | 15 | 7  | 8  | 0.0666667 | 0.99940313 | FAM105B   | ANKH      |   |
| chr5 | +(14797340..14798206) | 866  | 0.26306 | 19 | 9  | 10 | 0.0526316 | 0.01688149 | FAM105B   | ANKH      |   |
| chr5 | +(15734930..15735596) | 666  | 2.83731 | 6  | 3  | 3  | 0         | 0.05       | FBXL7     | 40979     |   |
| chr5 | +(28927128..28927828) | 700  | 0.11662 | 13 | 6  | 7  | 0.0769231 | 0.0992714  | LOC729862 | CDH6      |   |
| chr5 | +(31750402..31751102) | 700  | 2.83731 | 10 | 6  | 4  | 0.2       | 0.005      | C5orf22   | PDZD2     |   |
| chr5 | +(31940214..31940892) | 678  | 2.83731 | 9  | 6  | 3  | 0.3333333 | 0.988      | MIR4279   | GOLPH3    |   |
| chr5 | +(32403815..32404395) | 580  | 0.61213 | 10 | 3  | 7  | 0.4       | 0.008      | MTMR12    | ZFR       |   |
| chr5 | +(34945894..34946442) | 548  | 1.33407 | 8  | 5  | 3  | 0.25      | 0.125      | DNAJC21   | AGXT2     |   |
| chr5 | +(35324605..35325196) | 591  | 2.83731 | 6  | 3  | 3  | 0         | 0.05       | PRLR      | SPEF2     |   |
| chr5 | +(35705432..35706010) | 578  | 2.83731 | 9  | 3  | 6  | 0.3333333 | 0.024      | SPEF2     | IL7R      |   |
| chr5 | +(35874407..35874908) | 501  | 2.83731 | 12 | 4  | 8  | 0.3333333 | 0.024      | IL7R      | CAPSL     |   |
| chr5 | +(36035695..36036234) | 539  | 1.67066 | 18 | 11 | 7  | 0.2222222 | 0.0469197  | UGT3A1    | UGT3A2    |   |
| chr5 | +(36265330..36265833) | 503  | 2.83731 | 7  | 3  | 4  | 0.1428571 | 0.314      | C5orf33   | RANBP3L   |   |
| chr5 | +(37000653..37001160) | 507  | 1.33407 | 15 | 8  | 7  | 0.0666667 | 0.01031878 | NIPBL     | C5orf42   |   |
| chr5 | +(37021909..37022432) | 523  | 2.83731 | 6  | 2  | 4  | 0.3333333 | 0.067      | NIPBL     | C5orf42   |   |
| chr5 | +(37291661..37292261) | 600  | 1.33407 | 8  | 5  | 3  | 0.25      | 0.018      | C5orf42   | NUP155    | v |
| chr5 | +(38511805..38512315) | 510  | 2.83731 | 6  | 4  | 2  | 0.3333333 | 0.067      | EGFLAM    | LIFR      |   |
| chr5 | +(38949773..38950669) | 896  | 2.83731 | 20 | 10 | 10 | 0         | 0.08680868 | OSMR      | RICTOR    |   |
| chr5 | +(42336965..42337571) | 606  | 1.33407 | 7  | 4  | 3  | 0.1428571 | 0.029      | FBXO4     | GHR       |   |
| chr5 | +(42582473..42583124) | 651  | 2.83731 | 6  | 4  | 2  | 0.3333333 | 0.067      | GHR       | CCDC152   |   |
| chr5 | +(43659063..43659638) | 575  | 2.83731 | 7  | 3  | 4  | 0.1428571 | 0.029      | NNT       | FGF10     |   |
| chr5 | +(49695477..49695979) | 502  | 2.83731 | 6  | 4  | 2  | 0.3333333 | 0.067      | HCN1      | EMB       |   |
| chr5 | +(50111038..50111574) | 536  | 0.61213 | 8  | 3  | 5  | 0.25      | 0.018      | PARP8     | ISL1      |   |
| chr5 | +(54720683..54721322) | 639  | 2.83731 | 6  | 4  | 2  | 0.3333333 | 0.067      | SKIV2L2   | PPAP2A    | v |
| chr5 | +(58271466..58272166) | 700  | 0.15683 | 15 | 6  | 9  | 0.2       | 0.00073136 | RAB3C     | PDE4D     |   |
| chr5 | +(58292897..58293868) | 971  | 0.00188 | 25 | 15 | 10 | 0.2       | 1.5895E-05 | RAB3C     | PDE4D     |   |

|      |                       |      |         |    |    |    |           |            |              |           |
|------|-----------------------|------|---------|----|----|----|-----------|------------|--------------|-----------|
| chr5 | +(60859837..60861019) | 1182 | 0.02552 | 18 | 6  | 12 | 0.3333333 | 0.99962648 | ZSWIM6       | FLJ37543  |
| chr5 | +(60982471..60983079) | 608  | 1.33407 | 9  | 4  | 5  | 0.1111111 | 0.016      | FLJ37543     | KIF2A     |
| chr5 | +(61653830..61654447) | 617  | 0.61213 | 12 | 6  | 6  | 0         | 0.07477068 | KIF2A        | DIMT1L    |
| chr5 | +(61779596..61780293) | 697  | 0.26306 | 11 | 6  | 5  | 0.0909091 | 0.01422987 | IPO11        | LRRC70    |
| chr5 | +(61876793..61877442) | 649  | 0.61213 | 9  | 3  | 6  | 0.3333333 | 0.012      | LRRC70       | HTR1A     |
| chr5 | +(63626629..63627874) | 1245 | 0.11662 | 20 | 10 | 10 | 0         | 7.8526E-05 | RNF180       | RGS7BP    |
| chr5 | +(63802062..63802751) | 689  | 1.33407 | 10 | 3  | 7  | 0.4       | 0.258      | RNF180       | RGS7BP    |
| chr5 | +(64082214..64082716) | 502  | 2.83731 | 9  | 6  | 3  | 0.3333333 | 0.024      | CWC27        | ADAMTS6   |
| chr5 | +(64181048..64181562) | 514  | 1.33407 | 11 | 6  | 5  | 0.0909091 | 0.00881105 | CWC27        | ADAMTS6   |
| chr5 | +(64748632..64749146) | 514  | 2.83731 | 10 | 6  | 4  | 0.2       | 0.005      | CWC27        | ADAMTS6   |
| chr5 | +(65370673..65371280) | 607  | 0.11662 | 12 | 4  | 8  | 0.3333333 | 0.00328926 | LOC100303749 | SREK1     |
| chr5 | +(65798804..65799380) | 576  | 2.83731 | 6  | 3  | 3  | 0         | 0.05       | SREK1        | MAST4     |
| chr5 | +(66456075..66456610) | 535  | 0.61213 | 8  | 4  | 4  | 0         | 0.014      | MAST4        | CD180     |
| chr5 | +(66460838..66461597) | 759  | 0.11662 | 15 | 8  | 7  | 0.0666667 | 0.00059687 | MAST4        | CD180     |
| chr5 | +(67634578..67635418) | 840  | 0.00188 | 15 | 9  | 6  | 0.2       | 0.00073136 | PIK3R1       | SLC30A5   |
| chr5 | +(68370603..68371247) | 644  | 1.33407 | 9  | 6  | 3  | 0.3333333 | 0.274      | PIK3R1       | SLC30A5   |
| chr5 | +(68411800..68412308) | 508  | 2.83731 | 9  | 5  | 4  | 0.1111111 | 0.452      | SLC30A5      | CCNB1     |
| chr5 | +(69715932..69716549) | 617  | 1.67066 | 22 | 15 | 7  | 0.3636364 | 0.01878678 | GTF2H2B      | SMA5      |
| chr5 | +(69717200..69717715) | 515  | 0.26306 | 14 | 6  | 8  | 0.1428571 | 0.00097289 | GTF2H2B      | SMA5      |
| chr5 | +(69729790..69730476) | 686  | 0.05995 | 17 | 8  | 9  | 0.0588235 | 0.06182886 | GTF2H2B      | SMA5      |
| chr5 | +(69737088..69737863) | 775  | 2.5E-05 | 49 | 30 | 19 | 0.2244898 | 1.4452E-06 | GTF2H2B      | SMA5      |
| chr5 | +(70212555..70213419) | 864  | 0.12647 | 58 | 31 | 27 | 0.0689655 | 7.9852E-09 | SERF1B_dup2  | SMN1_dup2 |
| chr5 | +(70234528..70235125) | 597  | 0.61698 | 48 | 33 | 15 | 0.375     | 1.3778E-05 | SMN2_dup2    | NAIP      |
| chr5 | +(70240340..70240890) | 550  | 4.35408 | 20 | 10 | 10 | 0         | 7.8526E-05 | SMN2_dup2    | NAIP      |
| chr5 | +(70241458..70242129) | 671  | 0.14093 | 30 | 12 | 18 | 0.2       | 0.00115184 | SMN2_dup2    | NAIP      |
| chr5 | +(70840239..70840783) | 544  | 2.83731 | 10 | 6  | 4  | 0.2       | 0.967      | BDP1         | MCCC2     |
| chr5 | +(70945705..70946210) | 505  | 0.61213 | 9  | 5  | 4  | 0.1111111 | 0.008      | MCCC2        | CARTPT    |
| chr5 | +(71295652..71296350) | 698  | 0.61213 | 8  | 3  | 5  | 0.25      | 0.018      | CARTPT       | MAP1B     |
| chr5 | +(71491230..71491774) | 544  | 1.33407 | 16 | 6  | 10 | 0.25      | 0.45681333 | MAP1B        | MRPS27    |
| chr5 | +(71648157..71648857) | 700  | 2.83731 | 15 | 5  | 10 | 0.3333333 | 0.5        | PTCD2        | ZNF366    |
| chr5 | +(71739635..71740251) | 616  | 1.33407 | 12 | 6  | 6  | 0         | 0.16833419 | PTCD2        | ZNF366    |
| chr5 | +(71756536..71757091) | 555  | 2.83731 | 10 | 7  | 3  | 0.4       | 0.333      | PTCD2        | ZNF366    |
| chr5 | +(72192646..72193173) | 527  | 0.61213 | 12 | 7  | 5  | 0.1666667 | 0.34237168 | TNPO1        | FCHO2     |
| chr5 | +(72743508..72744034) | 526  | 2.83731 | 6  | 4  | 2  | 0.3333333 | 0.067      | TMEM174      | FOXD1     |

|      |                         |      |         |    |    |    |           |            |              |              |   |
|------|-------------------------|------|---------|----|----|----|-----------|------------|--------------|--------------|---|
| chr5 | +(75884349..75885028)   | 679  | 1.33407 | 11 | 7  | 4  | 0.2727273 | 0.158      | IQGAP2       | F2RL2        |   |
| chr5 | +(76760355..76760954)   | 599  | 2.83731 | 11 | 7  | 4  | 0.2727273 | 0.003      | PDE8B        | WDR41        |   |
| chr5 | +(77788303..77788833)   | 530  | 0.61213 | 8  | 3  | 5  | 0.25      | 0.018      | SCAMP1       | LHFPL2       |   |
| chr5 | +(78925648..78926223)   | 575  | 0.61213 | 8  | 3  | 5  | 0.25      | 0.018      | PAPD4        | CMYA5        |   |
| chr5 | +(79374457..79375029)   | 572  | 2.83731 | 9  | 3  | 6  | 0.3333333 | 0.548      | THBS4        | SERINC5      |   |
| chr5 | +(80370767..80371991)   | 1224 | 2.83731 | 12 | 6  | 6  | 0         | 0.99802612 | RASGRF2      | RNU5E        | v |
| chr5 | +(85578378..85579234)   | 856  | 0.11662 | 23 | 11 | 12 | 0.0434783 | 0.00044452 | NBPF22P      | COX7C        |   |
| chr5 | +(85580528..85581208)   | 680  | 0.00753 | 30 | 19 | 11 | 0.2666667 | 0.01843193 | NBPF22P      | COX7C        |   |
| chr5 | +(85588502..85589270)   | 768  | 0.5982  | 35 | 13 | 22 | 0.2571429 | 0.00094598 | NBPF22P      | COX7C        |   |
| chr5 | +(85591790..85592611)   | 821  | 1.33407 | 13 | 5  | 8  | 0.2307692 | 0.00420773 | NBPF22P      | COX7C        |   |
| chr5 | +(89920656..89921203)   | 547  | 1.33407 | 8  | 3  | 5  | 0.25      | 0.286      | GPR98        | ARRDC3       |   |
| chr5 | +(93929385..93929902)   | 517  | 2.83731 | 9  | 5  | 4  | 0.1111111 | 0.056      | POU5F2       | C5orf36      |   |
| chr5 | +(95087688..95088197)   | 509  | 1.33407 | 10 | 7  | 3  | 0.4       | 0.192      | RHOBTB3      | GLRX         |   |
| chr5 | +(95158029..95158555)   | 526  | 2.83731 | 10 | 6  | 4  | 0.2       | 0.381      | RHOBTB3      | GLRX         |   |
| chr5 | +(95249292..95249813)   | 521  | 0.61213 | 10 | 4  | 6  | 0.2       | 0.005      | C5orf27      | ELL2         |   |
| chr5 | +(101590692..101591329) | 637  | 2.83731 | 6  | 3  | 3  | 0         | 0.05       | ST8SIA4      | SLCO4C1      |   |
| chr5 | +(101592684..101593233) | 549  | 1.33407 | 9  | 5  | 4  | 0.1111111 | 0.032      | ST8SIA4      | SLCO4C1      |   |
| chr5 | +(102285230..102285748) | 518  | 2.83731 | 13 | 8  | 5  | 0.2307692 | 0.27909232 | PAM          | GIN1         |   |
| chr5 | +(102432669..102433183) | 514  | 0.61213 | 12 | 6  | 6  | 0         | 0.00520281 | PAM          | GIN1         |   |
| chr5 | +(102440107..102440619) | 512  | 2.83731 | 8  | 4  | 4  | 0         | 0.1        | PAM          | GIN1         |   |
| chr5 | +(102468949..102469502) | 553  | 2.83731 | 10 | 5  | 5  | 0         | 0.17360382 | PIIP5K2      | C5orf30      |   |
| chr5 | +(102613103..102613608) | 505  | 2.83731 | 9  | 6  | 3  | 0.3333333 | 0.048      | C5orf30      | NUDT12       |   |
| chr5 | +(108713696..108714354) | 658  | 1.33407 | 13 | 8  | 5  | 0.2307692 | 0.1207833  | FER          | PJA2         |   |
| chr5 | +(109120367..109120884) | 517  | 0.61213 | 10 | 6  | 4  | 0.2       | 0.457      | MAN2A1       | LOC100289673 |   |
| chr5 | +(109200653..109201176) | 523  | 1.33407 | 9  | 5  | 4  | 0.1111111 | 0.095      | MAN2A1       | LOC100289673 |   |
| chr5 | +(109904099..109904691) | 592  | 0.61213 | 12 | 8  | 4  | 0.3333333 | 0.014      | LOC100289673 | TMEM232      |   |
| chr5 | +(110784451..110785123) | 672  | 0.61213 | 13 | 5  | 8  | 0.2307692 | 0.02021199 | CAMK4        | STARD4       |   |
| chr5 | +(111610735..111611248) | 513  | 1.33407 | 9  | 5  | 4  | 0.1111111 | 0.008      | SNORA13      | EPB41L4A     |   |
| chr5 | +(112203047..112203595) | 548  | 2.83731 | 13 | 6  | 7  | 0.0769231 | 0.01606229 | SRP19        | REEP5        |   |
| chr5 | +(112367187..112367887) | 700  | 0.61213 | 9  | 3  | 6  | 0.3333333 | 0.012      | DCP2         | MCC          |   |
| chr5 | +(113822531..113823053) | 522  | 2.83731 | 7  | 4  | 3  | 0.1428571 | 0.057      | KCNN2        | TRIM36       | v |
| chr5 | +(116273175..116273875) | 700  | 0.00188 | 15 | 5  | 10 | 0.3333333 | 0.00109982 | SEMA6A       | DTWD2        |   |
| chr5 | +(118309998..118310633) | 635  | 3.40873 | 46 | 28 | 18 | 0.2173913 | 2.8027E-05 | SEMA6A       | DTWD2        |   |
| chr5 | +(118512877..118513413) | 536  | 1.33407 | 8  | 3  | 5  | 0.25      | 0.018      | DMXL1        | TNFAIP8      |   |

|      |                         |      |         |    |    |    |           |            |                 |          |
|------|-------------------------|------|---------|----|----|----|-----------|------------|-----------------|----------|
| chr5 | +(118969719..118970378) | 659  | 0.26306 | 10 | 5  | 5  | 0         | 0.00451172 | FAM170A         | PRR16    |
| chr5 | +(121760868..121761381) | 513  | 2.83731 | 8  | 4  | 4  | 0         | 0.029      | SNCAIP          | SNX2     |
| chr5 | +(122361326..122362026) | 700  | 0.26306 | 10 | 7  | 3  | 0.4       | 0.008      | SNX24           | PPIC     |
| chr5 | +(122736573..122737123) | 550  | 1.33407 | 7  | 4  | 3  | 0.1428571 | 0.029      | PRDM6           | CEP120   |
| chr5 | +(122758261..122759581) | 1320 | 0.02552 | 20 | 8  | 12 | 0.2       | 0.53074856 | PRDM6           | CEP120   |
| chr5 | +(122911330..122912030) | 700  | 0.69282 | 20 | 13 | 7  | 0.3       | 0.03128691 | CSNK1G3         | ZNF608   |
| chr5 | +(122990828..122991331) | 503  | 0.61213 | 8  | 4  | 4  | 0         | 0.014      | CSNK1G3         | ZNF608   |
| chr5 | +(123982952..123984009) | 1057 | 2.39506 | 33 | 20 | 13 | 0.2121212 | 0.0044495  | CSNK1G3         | ZNF608   |
| chr5 | +(125758437..125759137) | 700  | 0.61213 | 12 | 4  | 8  | 0.3333333 | 0.00328926 | GRAMD3          | ALDH7A1  |
| chr5 | +(125941697..125942397) | 700  | 0.11662 | 10 | 6  | 4  | 0.2       | 0.005      | PHAX            | C5orf48  |
| chr5 | +(126860029..126860530) | 501  | 2.83731 | 10 | 5  | 5  | 0         | 0.45840747 | PRRC1           | CTXN3    |
| chr5 | +(128301812..128302351) | 539  | 2.83731 | 9  | 4  | 5  | 0.1111111 | 0.206      | SLC27A6         | ISOC1    |
| chr5 | +(128324099..128324659) | 560  | 0.99425 | 20 | 9  | 11 | 0.1       | 0.00062137 | SLC27A6         | ISOC1    |
| chr5 | +(130777754..130778313) | 559  | 2.83731 | 9  | 3  | 6  | 0.3333333 | 0.048      | CDC42SE2        | RAPGEF6  |
| chr5 | +(132159111..132159866) | 755  | 0.00188 | 22 | 13 | 9  | 0.1818182 | 0.00226938 | ANKRD43         | SHROOM1  |
| chr5 | +(132233645..132234188) | 543  | 2.83731 | 6  | 4  | 2  | 0.3333333 | 0.067      | LEAP2           | AFF4     |
| chr5 | +(132784005..132784554) | 549  | 0.61213 | 8  | 5  | 3  | 0.25      | 0.018      | HSPA4           | FSTL4    |
| chr5 | +(132829179..132829718) | 539  | 2.83731 | 6  | 3  | 3  | 0         | 0.05       | HSPA4           | FSTL4    |
| chr5 | +(133278313..133279013) | 700  | 0.01049 | 13 | 5  | 8  | 0.2307692 | 0.0017074  | MIR1289-2       | C5orf15  |
| chr5 | +(133295178..133295686) | 508  | 2.83731 | 10 | 3  | 7  | 0.4       | 0.092      | MIR1289-2       | C5orf15  |
| chr5 | +(133324423..133325733) | 1310 | 2.83731 | 12 | 6  | 6  | 0         | 0.00197388 | C5orf15         | VDAC1    |
| chr5 | +(133888939..133889639) | 700  | 0.05995 | 11 | 7  | 4  | 0.2727273 | 0.003      | PHF15           | SAR1B    |
| chr5 | +(133890103..133890702) | 599  | 0.26306 | 9  | 4  | 5  | 0.1111111 | 0.008      | PHF15           | SAR1B    |
| chr5 | +(133931622..133932319) | 697  | 2.83731 | 6  | 4  | 2  | 0.3333333 | 0.067      | PHF15           | SAR1B    |
| chr5 | +(134191994..134192498) | 504  | 2.83731 | 7  | 3  | 4  | 0.1428571 | 0.029      | C5orf24         | TXNDC15  |
| chr5 | +(134259507..134260481) | 974  | 0.05995 | 30 | 14 | 16 | 0.0666667 | 0.02300038 | PCBD2           | CATSPER3 |
| chr5 | +(136602237..136602743) | 506  | 2.83731 | 6  | 2  | 4  | 0.3333333 | 0.067      | TRPC7           | SPOCK1   |
| chr5 | +(137677185..137677748) | 563  | 1.33407 | 11 | 4  | 7  | 0.2727273 | 0.082      | FAM53C          | KDM3B    |
| chr5 | +(138208715..138209309) | 594  | 0.61213 | 13 | 8  | 5  | 0.2307692 | 0.1207833  | CTNNA1          | LRRTM2   |
| chr5 | +(138261992..138262670) | 678  | 0.26306 | 9  | 5  | 4  | 0.1111111 | 0.008      | LRRTM2          | SIL1     |
| chr5 | +(138717256..138717778) | 522  | 0.26306 | 13 | 4  | 9  | 0.3846154 | 0.413      | PAIP2           | SLC23A1  |
| chr5 | +(139216307..139216946) | 639  | 0.61213 | 9  | 6  | 3  | 0.3333333 | 0.083      | PSD2            | NRG2     |
| chr5 | +(139745089..139746007) | 918  | 2.83731 | 15 | 9  | 6  | 0.2       | 0.00666417 | SLC4A9          | ANKHD1   |
| chr5 | +(139844172..139844859) | 687  | 1.33407 | 10 | 7  | 3  | 0.4       | 0.192      | ANKHD1-EIF4EBP3 | EIF4EBP3 |

|      |                         |      |         |    |    |    |           |            |                 |           |
|------|-------------------------|------|---------|----|----|----|-----------|------------|-----------------|-----------|
| chr5 | +(139908918..139909516) | 598  | 0.05995 | 13 | 5  | 8  | 0.2307692 | 0.00420773 | ANKHD1-EIF4EBP3 | EIF4EBP3  |
| chr5 | +(140167492..140168538) | 1046 | 1.33407 | 17 | 8  | 9  | 0.0588235 | 0.0014273  | PCDHA1          | PCDHA2    |
| chr5 | +(140207744..140208247) | 503  | 2.83731 | 7  | 3  | 4  | 0.1428571 | 0.057      | PCDHA6          | PCDHA7    |
| chr5 | +(140228397..140229457) | 1060 | 0.02552 | 47 | 24 | 23 | 0.0212766 | 0.01272351 | PCDHA9          | PCDHA10   |
| chr5 | +(140230057..140230559) | 502  | 2.83731 | 9  | 3  | 6  | 0.3333333 | 0.19       | PCDHA9          | PCDHA10   |
| chr5 | +(140593613..140594217) | 604  | 0.12647 | 48 | 25 | 23 | 0.0416667 | 0.00509406 | PCDHB13         | PCDHB14   |
| chr5 | +(140745507..140746168) | 661  | 0.26306 | 11 | 7  | 4  | 0.2727273 | 0.115      | PCDHGA5         | PCDHGB3   |
| chr5 | +(140777461..140777986) | 525  | 1.92865 | 26 | 11 | 15 | 0.1538462 | 0.00198556 | PCDHGA8         | PCDHGB5   |
| chr5 | +(140779778..140780307) | 529  | 0.61213 | 15 | 6  | 9  | 0.2       | 0.20469774 | PCDHGB5         | PCDHGA9   |
| chr5 | +(140868875..140869384) | 509  | 2.83731 | 9  | 4  | 5  | 0.1111111 | 0.365      | PCDHGC5         | DIAPH1    |
| chr5 | +(140870119..140871161) | 1042 | 1.33407 | 16 | 9  | 7  | 0.125     | 0.00251538 | PCDHGC5         | DIAPH1    |
| chr5 | +(141035145..141035776) | 631  | 2.83731 | 8  | 3  | 5  | 0.25      | 0.5        | FCHSD1          | ARAP3     |
| chr5 | +(141052999..141053713) | 714  | 0.00503 | 19 | 13 | 6  | 0.3684211 | 0.03275061 | FCHSD1          | ARAP3     |
| chr5 | +(143191443..143192136) | 693  | 0.11662 | 17 | 6  | 11 | 0.2941176 | 0.00064968 | NR3C1           | HMHB1     |
| chr5 | +(144405449..144406122) | 673  | 0.61213 | 8  | 4  | 4  | 0         | 0.014      | KCTD16          | PRELID2   |
| chr5 | +(145202435..145202937) | 502  | 2.83731 | 7  | 3  | 4  | 0.1428571 | 0.029      | KCTD16          | PRELID2   |
| chr5 | +(145383289..145383833) | 544  | 2.83731 | 6  | 4  | 2  | 0.3333333 | 0.067      | SH3RF2          | PLAC8L1   |
| chr5 | +(145664171..145664700) | 529  | 2.83731 | 9  | 4  | 5  | 0.1111111 | 0.016      | RBM27           | POU4F3    |
| chr5 | +(148245331..148245913) | 582  | 0.11662 | 10 | 7  | 3  | 0.4       | 0.008      | ADRB2           | SH3TC2    |
| chr5 | +(148420694..148421296) | 602  | 0.26306 | 10 | 4  | 6  | 0.2       | 0.086      | ADRB2           | SH3TC2    |
| chr5 | +(148618709..148619313) | 604  | 0.61213 | 11 | 4  | 7  | 0.2727273 | 0.003      | ABLIM3          | AFAP1L1   |
| chr5 | +(148761295..148761895) | 600  | 0.61213 | 9  | 5  | 4  | 0.1111111 | 0.008      | IL17B           | LOC728264 |
| chr5 | +(148784889..148785452) | 563  | 0.02552 | 12 | 8  | 4  | 0.3333333 | 0.99671074 | IL17B           | LOC728264 |
| chr5 | +(148808523..148809223) | 700  | 1.33407 | 11 | 7  | 4  | 0.2727273 | 0.997      | MIR143          | MIR145    |
| chr5 | +(149242490..149243019) | 529  | 2.83731 | 6  | 2  | 4  | 0.3333333 | 0.067      | PPARGC1B        | PDE6A     |
| chr5 | +(149276029..149277152) | 1123 | 0.05995 | 21 | 12 | 9  | 0.1428571 | 0.99946051 | PPARGC1B        | PDE6A     |
| chr5 | +(149488647..149489177) | 530  | 2.83731 | 6  | 3  | 3  | 0         | 0.05       | HMGXB3          | CSF1R     |
| chr5 | +(149757027..149757727) | 700  | 0.01049 | 13 | 8  | 5  | 0.2307692 | 0.0017074  | TCOF1           | CD74      |
| chr5 | +(149758685..149759376) | 691  | 1.33407 | 10 | 7  | 3  | 0.4       | 0.008      | TCOF1           | CD74      |
| chr5 | +(150020702..150021402) | 700  | 0.11662 | 10 | 3  | 7  | 0.4       | 0.008      | SYNPO           | MYOZ3     |
| chr5 | +(150027648..150028192) | 544  | 2.83731 | 6  | 4  | 2  | 0.3333333 | 0.067      | SYNPO           | MYOZ3     |
| chr5 | +(150030483..150031408) | 925  | 0.11662 | 23 | 10 | 13 | 0.1304348 | 0.96395138 | SYNPO           | MYOZ3     |
| chr5 | +(152206838..152208215) | 1377 | 0.02552 | 18 | 6  | 12 | 0.3333333 | 0.00037352 | NMUR2           | GRIA1     |
| chr5 | +(153078161..153078861) | 700  | 0.11662 | 10 | 3  | 7  | 0.4       | 0.008      | GRIA1           | FAM114A2  |

|      |                         |      |         |    |    |    |           |            |            |          |
|------|-------------------------|------|---------|----|----|----|-----------|------------|------------|----------|
| chr5 | +(153856074..153856612) | 538  | 2.83731 | 6  | 3  | 3  | 0         | 0.05       | SAP30L     | HAND1    |
| chr5 | +(156531306..156531913) | 607  | 2.83731 | 6  | 4  | 2  | 0.3333333 | 0.067      | HAVCR1     | HAVCR2   |
| chr5 | +(156820353..156820931) | 578  | 0.26306 | 9  | 4  | 5  | 0.1111111 | 0.008      | C5orf40    | NIPAL4   |
| chr5 | +(157001394..157002007) | 613  | 0.05995 | 11 | 7  | 4  | 0.2727273 | 0.003      | NIPAL4     | ADAM19   |
| chr5 | +(157216325..157216901) | 576  | 1.33407 | 11 | 7  | 4  | 0.2727273 | 0.606      | LSM11      | CLINT1   |
| chr5 | +(158523876..158524474) | 598  | 1.33407 | 7  | 3  | 4  | 0.1428571 | 0.029      | CLINT1     | EBF1     |
| chr5 | +(160016428..160016938) | 510  | 2.83731 | 6  | 4  | 2  | 0.3333333 | 0.067      | MIR146A    | ATP10B   |
| chr5 | +(161524419..161525063) | 644  | 0.26306 | 9  | 4  | 5  | 0.1111111 | 0.008      | GABRG2     | CCNG1    |
| chr5 | +(161580060..161580661) | 601  | 0.61213 | 15 | 7  | 8  | 0.0666667 | 0.06623179 | GABRG2     | CCNG1    |
| chr5 | +(164022067..164022662) | 595  | 2.83731 | 6  | 3  | 3  | 0         | 0.05       | MAT2B      | ODZ2     |
| chr5 | +(165809166..165809675) | 509  | 1.33407 | 9  | 5  | 4  | 0.1111111 | 0.032      | MAT2B      | ODZ2     |
| chr5 | +(166069996..166070498) | 502  | 1.33407 | 8  | 3  | 5  | 0.25      | 0.018      | MAT2B      | ODZ2     |
| chr5 | +(167400351..167401051) | 700  | 0.26306 | 13 | 4  | 9  | 0.3846154 | 0.999      | ODZ2       | WWC1     |
| chr5 | +(167469692..167470336) | 644  | 2.83731 | 6  | 2  | 4  | 0.3333333 | 0.067      | ODZ2       | WWC1     |
| chr5 | +(167581681..167582525) | 844  | 0.11662 | 15 | 10 | 5  | 0.3333333 | 0.00109982 | ODZ2       | WWC1     |
| chr5 | +(167671208..167671905) | 697  | 0.11662 | 10 | 3  | 7  | 0.4       | 0.008      | ODZ2       | WWC1     |
| chr5 | +(167914346..167914854) | 508  | 0.26306 | 9  | 5  | 4  | 0.1111111 | 0.008      | RARS       | FBLL1    |
| chr5 | +(167928581..167929281) | 700  | 0.11662 | 12 | 4  | 8  | 0.3333333 | 0.00328926 | RARS       | FBLL1    |
| chr5 | +(167992888..167993497) | 609  | 2.83731 | 9  | 6  | 3  | 0.3333333 | 0.131      | FBLL1      | PANK3    |
| chr5 | +(168233093..168233764) | 671  | 0.11662 | 12 | 5  | 7  | 0.1666667 | 0.00224163 | MIR103-1AS | SLIT3    |
| chr5 | +(169812206..169812890) | 684  | 2.83731 | 6  | 3  | 3  | 0         | 0.05       | KCNIP1     | KCNMB1   |
| chr5 | +(169864915..169865884) | 969  | 2.83731 | 12 | 4  | 8  | 0.3333333 | 0.00328926 | KCNMB1     | GABRP    |
| chr5 | +(171595880..171596445) | 565  | 2.83731 | 6  | 2  | 4  | 0.3333333 | 0.067      | FBXW11     | STK10    |
| chr5 | +(173530818..173531426) | 608  | 2.83731 | 10 | 4  | 6  | 0.2       | 0.695      | HMP19      | MSX2     |
| chr5 | +(173689145..173689756) | 611  | 2.83731 | 6  | 3  | 3  | 0         | 0.05       | HMP19      | MSX2     |
| chr5 | +(173864491..173865398) | 907  | 1.33407 | 13 | 7  | 6  | 0.0769231 | 0.0013499  | HMP19      | MSX2     |
| chr5 | +(175717983..175718669) | 686  | 0.61213 | 8  | 4  | 4  | 0         | 0.014      | C5orf25    | KIAA1191 |
| chr5 | +(175972762..175973569) | 807  | 0.05995 | 12 | 8  | 4  | 0.3333333 | 0.99671074 | CDHR2      | GPRIN1   |
| chr5 | +(176001920..176002728) | 808  | 0.26306 | 20 | 8  | 12 | 0.2       | 0.96796124 | CDHR2      | GPRIN1   |
| chr5 | +(176021180..176022959) | 1779 | 0.61213 | 24 | 11 | 13 | 0.0833333 | 0.46537358 | CDHR2      | GPRIN1   |
| chr5 | +(176335308..176335816) | 508  | 2.83731 | 9  | 4  | 5  | 0.1111111 | 0.032      | HK3        | UIMC1    |
| chr5 | +(176339531..176340122) | 591  | 2.83731 | 6  | 2  | 4  | 0.3333333 | 0.067      | HK3        | UIMC1    |
| chr5 | +(176729752..176730370) | 618  | 0.11662 | 11 | 5  | 6  | 0.0909091 | 0.03394459 | NSD1       | RAB24    |
| chr5 | +(176832142..176833099) | 957  | 2.83731 | 15 | 6  | 9  | 0.2       | 0.03854994 | PFN3       | F12      |

|      |                         |      |         |    |    |    |           |            |           |           |
|------|-------------------------|------|---------|----|----|----|-----------|------------|-----------|-----------|
| chr5 | +(176856069..176856622) | 553  | 2.83731 | 6  | 2  | 4  | 0.3333333 | 0.067      | GRK6      | PRR7      |
| chr5 | +(177163202..177163793) | 591  | 2.83731 | 12 | 6  | 6  | 0         | 0.21166982 | LOC202181 | FAM153A   |
| chr5 | +(177238921..177239621) | 700  | 0.05995 | 11 | 6  | 5  | 0.0909091 | 0.00308495 | FAM153A   | LOC728554 |
| chr5 | +(177461684..177462400) | 716  | 0.5982  | 48 | 21 | 27 | 0.125     | 2.893E-07  | FAM153C   | N4BP3     |
| chr5 | +(177465748..177466296) | 548  | 1.29796 | 32 | 22 | 10 | 0.375     | 0.34216639 | FAM153C   | N4BP3     |
| chr5 | +(177468686..177469704) | 1018 | 0.14093 | 52 | 30 | 22 | 0.1538462 | 0.00016332 | FAM153C   | N4BP3     |
| chr5 | +(177473489..177474001) | 512  | 2.83731 | 29 | 19 | 10 | 0.3103448 | 0.99490709 | FAM153C   | N4BP3     |
| chr5 | +(177707348..177708020) | 672  | 1.33407 | 10 | 7  | 3  | 0.4       | 0.992      | AGXT2L2   | COL23A1   |
| chr5 | +(177905192..177905892) | 700  | 0.05995 | 11 | 4  | 7  | 0.2727273 | 0.003      | AGXT2L2   | COL23A1   |
| chr5 | +(178011878..178013226) | 1348 | 0.00011 | 82 | 56 | 26 | 0.3658537 | 1          | AGXT2L2   | COL23A1   |
| chr5 | +(178016368..178017696) | 1328 | 0.61213 | 15 | 8  | 7  | 0.0666667 | 0.00059687 | AGXT2L2   | COL23A1   |
| chr5 | +(178556911..178557458) | 547  | 0.61213 | 8  | 5  | 3  | 0.25      | 0.018      | ZNF354C   | ADAMTS2   |
| chr5 | +(178562641..178563334) | 693  | 2.83731 | 9  | 6  | 3  | 0.3333333 | 0.988      | ZNF354C   | ADAMTS2   |
| chr5 | +(178644911..178645422) | 511  | 0.61213 | 8  | 5  | 3  | 0.25      | 0.018      | ZNF354C   | ADAMTS2   |
| chr5 | +(178724872..178725598) | 726  | 0.01049 | 13 | 6  | 7  | 0.0769231 | 0.0013499  | ZNF354C   | ADAMTS2   |
| chr5 | +(178749659..178750184) | 525  | 1.33407 | 7  | 3  | 4  | 0.1428571 | 0.029      | ZNF354C   | ADAMTS2   |
| chr5 | +(178795069..178795779) | 710  | 0.0018  | 16 | 10 | 6  | 0.25      | 0.00056905 | ADAMTS2   | RUFY1     |
| chr5 | +(178883204..178883904) | 700  | 0.11662 | 10 | 4  | 6  | 0.2       | 0.005      | ADAMTS2   | RUFY1     |
| chr5 | +(179044822..179045386) | 564  | 2.83731 | 8  | 5  | 3  | 0.25      | 0.071      | RUFY1     | HNRNPH1   |
| chr5 | +(179150354..179150966) | 612  | 0.61213 | 10 | 4  | 6  | 0.2       | 0.019      | CANX      | MAML1     |
| chr5 | +(179264370..179264883) | 513  | 0.61213 | 11 | 5  | 6  | 0.0909091 | 0.00881105 | SQSTM1    | C5orf45   |
| chr5 | +(179778291..179779486) | 1195 | 2.83731 | 12 | 6  | 6  | 0         | 0.00197388 | MAPK9     | GFPT2     |
| chr5 | +(180017502..180018202) | 700  | 2.83731 | 9  | 6  | 3  | 0.3333333 | 0.012      | CNOT6     | SCGB3A1   |
| chr5 | +(180045124..180046188) | 1064 | 0.61213 | 15 | 8  | 7  | 0.0666667 | 0.99940313 | SCGB3A1   | FLT4      |
| chr6 | +(302365..302885)       | 520  | 3.30942 | 6  | 2  | 4  | 0.3333333 | 0.067      | DUSP22    | IRF4      |
| chr6 | +(3093848..3094548)     | 700  | 0.15779 | 11 | 4  | 7  | 0.2727273 | 0.003      | RIPK1     | BPHL      |
| chr6 | +(3292474..3293168)     | 694  | 0.15779 | 10 | 5  | 5  | 0         | 0.00451172 | PSMG4     | SLC22A23  |
| chr6 | +(3311898..3313242)     | 1344 | 3.30942 | 12 | 6  | 6  | 0         | 0.99802612 | PSMG4     | SLC22A23  |
| chr6 | +(3321701..3322215)     | 514  | 1.57131 | 7  | 4  | 3  | 0.1428571 | 0.029      | PSMG4     | SLC22A23  |
| chr6 | +(4903603..4904303)     | 700  | 1.57131 | 10 | 3  | 7  | 0.4       | 0.942      | CDYL      | RPP40     |
| chr6 | +(5652647..5653171)     | 524  | 0.68762 | 8  | 5  | 3  | 0.25      | 0.018      | FARS2     | NRN1      |
| chr6 | +(5710446..5711105)     | 659  | 3.30942 | 9  | 4  | 5  | 0.1111111 | 0.857      | FARS2     | NRN1      |
| chr6 | +(6219395..6220093)     | 698  | 3.30942 | 10 | 6  | 4  | 0.2       | 0.995      | NRN1      | F13A1     |
| chr6 | +(6518908..6519454)     | 546  | 0.68762 | 8  | 4  | 4  | 0         | 0.014      | F13A1     | LY86-AS1  |



|      |                       |      |         |      |     |      |           |            |              |              |   |
|------|-----------------------|------|---------|------|-----|------|-----------|------------|--------------|--------------|---|
| chr6 | +(8417010..8417710)   | 700  | 0.02086 | 20   | 14  | 6    | 0.4       | 0.31034536 | SCARNA27     | SLC35B3      |   |
| chr6 | +(8430186..8430785)   | 599  | 1.57131 | 10   | 7   | 3    | 0.4       | 0.008      | SCARNA27     | SLC35B3      |   |
| chr6 | +(10983276..10983976) | 700  | 3.30942 | 9    | 3   | 6    | 0.3333333 | 0.726      | SYCP2L       | ELOVL2       |   |
| chr6 | +(12684581..12685281) | 700  | 0.68762 | 13   | 5   | 8    | 0.2307692 | 0.9982926  | EDN1         | PHACTR1      |   |
| chr6 | +(13229760..13230621) | 861  | 0.0008  | 18   | 12  | 6    | 0.3333333 | 0.00037352 | PHACTR1      | TBC1D7       |   |
| chr6 | +(15486075..15486793) | 718  | 0.03399 | 12   | 6   | 6    | 0         | 0.00197388 | JARID2       | DTNBP1       | v |
| chr6 | +(15652077..15652600) | 523  | 3.30942 | 11   | 7   | 4    | 0.2727273 | 0.003      | JARID2       | DTNBP1       | v |
| chr6 | +(15759781..15760481) | 700  | 3.30942 | 10   | 4   | 6    | 0.2       | 0.005      | DTNBP1       | MYLIP        |   |
| chr6 | +(17771228..17771928) | 700  | 3.30942 | 9    | 6   | 3    | 0.3333333 | 0.726      | NUP153       | KIF13A       |   |
| chr6 | +(18459591..18460107) | 516  | 3.30942 | 8    | 4   | 4    | 0         | 0.343      | RNF144B      | MIR548A1     |   |
| chr6 | +(24643741..24644910) | 1169 | 0.08005 | 17   | 6   | 11   | 0.2941176 | 0.99954444 | ALDH5A1      | KIAA0319     |   |
| chr6 | +(25521540..25522172) | 632  | 3.30942 | 6    | 2   | 4    | 0.3333333 | 0.067      | LRRC16A      | SCGN         |   |
| chr6 | +(25850618..25851220) | 602  | 0.32535 | 12   | 4   | 8    | 0.3333333 | 0.077      | SLC17A1      | SLC17A3      |   |
| chr6 | +(27879508..27880088) | 580  | 0.68762 | 11   | 5   | 6    | 0.0909091 | 0.05017413 | HIST1H2BO    | OR2B2        |   |
| chr6 | +(29141630..29142164) | 534  | 0.15779 | 15   | 9   | 6    | 0.2       | 0.02256348 | OR2J2        | OR14J1       |   |
| chr6 | +(29912115..29913152) | 1037 | 1.57131 | 21   | 13  | 8    | 0.2380952 | 0.10913309 | HLA-A        | HCG9         |   |
| chr6 | +(29975569..29976361) | 792  | 3.30942 | 15   | 6   | 9    | 0.2       | 0.1728893  | HCG9         | ZNRD1-AS1    |   |
| chr6 | +(30514845..30515358) | 513  | 0.32535 | 12   | 4   | 8    | 0.3333333 | 0.004      | HLA-E        | GNL1         |   |
| chr6 | +(30671766..30673137) | 1371 | 0.32535 | 50   | 28  | 22   | 0.12      | 0.15474517 | NRM          | MDC1         |   |
| chr6 | +(30859161..30859722) | 561  | 0.15779 | 15   | 5   | 10   | 0.3333333 | 0.99890018 | DDR1         | GTF2H4       |   |
| chr6 | +(30917023..30917731) | 708  | 0.00497 | 53   | 17  | 36   | 0.3584906 | 0.35156157 | DPCR1        | MUC21        |   |
| chr6 | +(30918670..30919333) | 663  | 4.09809 | 30   | 17  | 13   | 0.1333333 | 0.01556664 | DPCR1        | MUC21        |   |
| chr6 | +(31132072..31134301) | 2229 | 1.1E-34 | 519  | 360 | 159  | 0.3872832 | 0.09193238 | TCF19        | POU5F1       |   |
| chr6 | +(31137546..31138903) | 1357 | 4E-209  | 2140 | 966 | 1174 | 0.0971963 | 0.90111116 | TCF19        | POU5F1       |   |
| chr6 | +(31595440..31595978) | 538  | 0.68762 | 14   | 8   | 6    | 0.1428571 | 0.98056645 | SNORA38      | BAT3         |   |
| chr6 | +(31603893..31604593) | 700  | 0.68762 | 12   | 7   | 5    | 0.1666667 | 0.14557611 | SNORA38      | BAT3         |   |
| chr6 | +(31639346..31639954) | 608  | 3.30942 | 9    | 3   | 6    | 0.3333333 | 0.726      | LY6G5B       | LY6G5C       |   |
| chr6 | +(31777934..31778448) | 514  | 3.30942 | 15   | 5   | 10   | 0.3333333 | 0.72985431 | LSM2         | HSPA1L       |   |
| chr6 | +(31797631..31798266) | 635  | 0.68762 | 18   | 11  | 7    | 0.2222222 | 0.12879966 | HSPA1B       | C6orf48      |   |
| chr6 | +(31868753..31869257) | 504  | 4.09809 | 13   | 6   | 7    | 0.0769231 | 0.00332094 | EHMT2        | ZBTB12       |   |
| chr6 | +(31984003..31984571) | 568  | 1.57131 | 13   | 8   | 5    | 0.2307692 | 0.55819127 | C4B_dup2     | CYP21A2_dup2 |   |
| chr6 | +(31992008..31993011) | 1003 | 1.57131 | 17   | 7   | 10   | 0.1764706 | 0.31279262 | C4B_dup2     | CYP21A2_dup2 |   |
| chr6 | +(32008029..32008649) | 620  | 3.30942 | 11   | 5   | 6    | 0.0909091 | 0.70805879 | CYP21A2_dup2 | TNXB_dup2    |   |
| chr6 | +(32017493..32018024) | 531  | 3.30942 | 6    | 2   | 4    | 0.3333333 | 0.067      | CYP21A2_dup2 | TNXB_dup2    |   |

|      |                       |      |         |    |    |    |           |            |          |          |
|------|-----------------------|------|---------|----|----|----|-----------|------------|----------|----------|
| chr6 | +(32261230..32261850) | 620  | 1.57131 | 18 | 10 | 8  | 0.1111111 | 0.67157329 | NOTCH4   | C6orf10  |
| chr6 | +(32336320..32336900) | 580  | 1.57131 | 10 | 4  | 6  | 0.2       | 0.01       | NOTCH4   | C6orf10  |
| chr6 | +(33154044..33154556) | 512  | 1.57131 | 10 | 3  | 7  | 0.4       | 0.033      | HLA-DPB2 | COL11A2  |
| chr6 | +(33380257..33380840) | 583  | 1.57131 | 10 | 3  | 7  | 0.4       | 0.033      | PHF1     | CUTA     |
| chr6 | +(33619708..33620373) | 665  | 3.30942 | 6  | 2  | 4  | 0.3333333 | 0.067      | ITPR3    | C6orf125 |
| chr6 | +(33661897..33662597) | 700  | 0.08005 | 11 | 6  | 5  | 0.0909091 | 0.00308495 | ITPR3    | C6orf125 |
| chr6 | +(34003666..34004171) | 505  | 1.57131 | 8  | 5  | 3  | 0.25      | 0.018      | MIR1275  | GRM4     |
| chr6 | +(34488137..34489396) | 1259 | 0.02086 | 20 | 9  | 11 | 0.1       | 0.84747057 | PACSIN1  | SPDEF    |
| chr6 | +(35478636..35479188) | 552  | 3.30942 | 6  | 2  | 4  | 0.3333333 | 0.067      | TEAD3    | TULP1    |
| chr6 | +(36261953..36262468) | 515  | 0.32535 | 9  | 4  | 5  | 0.1111111 | 0.008      | PNPLA1   | C6orf222 |
| chr6 | +(36709411..36709989) | 578  | 1.57131 | 8  | 4  | 4  | 0         | 0.014      | CDKN1A   | CPNE5    |
| chr6 | +(36945625..36946167) | 542  | 1.57131 | 8  | 5  | 3  | 0.25      | 0.018      | PI16     | MTCH1    |
| chr6 | +(39891732..39892527) | 795  | 0.00026 | 19 | 8  | 11 | 0.1578947 | 0.00013997 | DAAM2    | MOCS1    |
| chr6 | +(41203863..41204563) | 700  | 0.03399 | 12 | 7  | 5  | 0.1666667 | 0.00224163 | TREML4   | TREML2P1 |
| chr6 | +(41248430..41249038) | 608  | 0.68762 | 9  | 3  | 6  | 0.3333333 | 0.012      | TREML2P1 | TREM1    |
| chr6 | +(42123157..42123768) | 611  | 0.68762 | 10 | 7  | 3  | 0.4       | 0.017      | GUCA1A   | GUCA1B   |
| chr6 | +(42235687..42236387) | 700  | 0.02086 | 19 | 7  | 12 | 0.2631579 | 0.30604494 | MRPS10   | TRERF1   |
| chr6 | +(42664715..42665681) | 966  | 0.08005 | 17 | 11 | 6  | 0.2941176 | 0.18285615 | UBR2     | PRPH2    |
| chr6 | +(42975551..42976125) | 574  | 3.30942 | 13 | 5  | 8  | 0.2307692 | 0.8792167  | PPP2R5D  | MEA1     |
| chr6 | +(43006274..43007253) | 979  | 0.32535 | 15 | 9  | 6  | 0.2       | 0.99926864 | RRP36    | CUL7     |
| chr6 | +(43222532..43223046) | 514  | 3.30942 | 8  | 4  | 4  | 0         | 0.014      | TTBK1    | SLC22A7  |
| chr6 | +(43416802..43417332) | 530  | 3.30942 | 7  | 4  | 3  | 0.1428571 | 0.057      | ABCC10   | DLK2     |
| chr6 | +(43648653..43649434) | 781  | 0.68762 | 15 | 6  | 9  | 0.2       | 0.8271107  | RSPH9    | MRPS18A  |
| chr6 | +(44373739..44374510) | 771  | 1.57131 | 13 | 5  | 8  | 0.2307692 | 0.07161746 | CDC5L    | SUPT3H   |
| chr6 | +(44497846..44498546) | 700  | 0.15779 | 10 | 6  | 4  | 0.2       | 0.005      | CDC5L    | SUPT3H   |
| chr6 | +(45459326..45459844) | 518  | 3.30942 | 12 | 6  | 6  | 0         | 0.13116584 | RUNX2    | CLIC5    |
| chr6 | +(46107268..46107868) | 600  | 3.30942 | 7  | 3  | 4  | 0.1428571 | 0.314      | ENPP4    | ENPP5    |
| chr6 | +(46132913..46133470) | 557  | 3.30942 | 10 | 5  | 5  | 0         | 0.02360089 | ENPP4    | ENPP5    |
| chr6 | +(47253845..47254372) | 527  | 3.30942 | 9  | 4  | 5  | 0.1111111 | 0.032      | GPR110   | TNFRSF21 |
| chr6 | +(55374419..55374923) | 504  | 3.30942 | 6  | 2  | 4  | 0.3333333 | 0.067      | GFRAL    | HMGCLL1  |
| chr6 | +(56373110..56373626) | 516  | 3.30942 | 14 | 7  | 7  | 0         | 0.32736042 | COL21A1  | DST      |
| chr6 | +(56420244..56420786) | 542  | 3.30942 | 13 | 8  | 5  | 0.2307692 | 0.07161746 | COL21A1  | DST      |
| chr6 | +(56464647..56465212) | 565  | 1.57131 | 7  | 3  | 4  | 0.1428571 | 0.029      | COL21A1  | DST      |
| chr6 | +(56955315..56955920) | 605  | 0.03399 | 19 | 7  | 12 | 0.2631579 | 0.01730528 | ZNF451   | BAG2     |

|      |                         |     |         |    |    |   |           |            |           |          |
|------|-------------------------|-----|---------|----|----|---|-----------|------------|-----------|----------|
| chr6 | +(57374162..57374782)   | 620 | 3.30942 | 6  | 4  | 2 | 0.3333333 | 0.067      | PRIM2     | GUSBP4   |
| chr6 | +(64408031..64408798)   | 767 | 0.68762 | 13 | 8  | 5 | 0.2307692 | 0.02851994 | PHF3      | EYS      |
| chr6 | +(66204585..66205285)   | 700 | 1.57131 | 11 | 6  | 5 | 0.0909091 | 0.00308495 | PHF3      | EYS      |
| chr6 | +(68851343..68851889)   | 546 | 1.57131 | 7  | 3  | 4 | 0.1428571 | 0.029      | MCART3P   | BAI3     |
| chr6 | +(69577227..69577824)   | 597 | 1.57131 | 7  | 3  | 4 | 0.1428571 | 0.029      | BAI3      | LMBRD1   |
| chr6 | +(70461995..70462502)   | 507 | 3.30942 | 9  | 5  | 4 | 0.1111111 | 0.008      | BAI3      | LMBRD1   |
| chr6 | +(74072860..74073509)   | 649 | 1.57131 | 10 | 4  | 6 | 0.2       | 0.305      | C6orf221  | OOEP     |
| chr6 | +(74466126..74466648)   | 522 | 3.30942 | 8  | 5  | 3 | 0.25      | 0.018      | CD109     | COL12A1  |
| chr6 | +(80744806..80745317)   | 511 | 3.30942 | 9  | 4  | 5 | 0.1111111 | 0.206      | TTK       | BCKDHB   |
| chr6 | +(80775759..80776424)   | 665 | 0.68762 | 16 | 10 | 6 | 0.25      | 0.19277332 | TTK       | BCKDHB   |
| chr6 | +(84650108..84650643)   | 535 | 1.57131 | 10 | 6  | 4 | 0.2       | 0.005      | CYB5R4    | MRAP2    |
| chr6 | +(84862153..84862686)   | 533 | 3.30942 | 7  | 3  | 4 | 0.1428571 | 0.2        | MRAP2     | KIAA1009 |
| chr6 | +(90359585..90360120)   | 535 | 3.30942 | 7  | 4  | 3 | 0.1428571 | 0.029      | LYRM2     | MDN1     |
| chr6 | +(90374058..90374601)   | 543 | 1.57131 | 8  | 5  | 3 | 0.25      | 0.018      | LYRM2     | MDN1     |
| chr6 | +(94120307..94120834)   | 527 | 3.30942 | 9  | 4  | 5 | 0.1111111 | 0.278      | MAP3K7    | EPHA7    |
| chr6 | +(110746014..110746518) | 504 | 3.30942 | 8  | 5  | 3 | 0.25      | 0.018      | DDO       | SLC22A16 |
| chr6 | +(111318366..111318935) | 569 | 3.30942 | 6  | 3  | 3 | 0         | 0.05       | RPF2      | GSTM2P1  |
| chr6 | +(117010263..117010793) | 530 | 3.30942 | 10 | 4  | 6 | 0.2       | 0.005      | KPNA5     | FAM162B  |
| chr6 | +(117638156..117638735) | 579 | 1.57131 | 8  | 4  | 4 | 0         | 0.014      | VGLL2     | ROS1     |
| chr6 | +(118588089..118588667) | 578 | 0.68762 | 12 | 8  | 4 | 0.3333333 | 0.014      | SLC35F1   | C6orf204 |
| chr6 | +(119136009..119136680) | 671 | 0.03399 | 21 | 13 | 8 | 0.2380952 | 0.2128337  | PLN       | MCM9     |
| chr6 | +(119182113..119182709) | 596 | 3.30942 | 6  | 2  | 4 | 0.3333333 | 0.067      | PLN       | MCM9     |
| chr6 | +(123576722..123577229) | 507 | 3.30942 | 8  | 4  | 4 | 0         | 0.171      | CLVS2     | TRDN     |
| chr6 | +(123833169..123833675) | 506 | 3.30942 | 6  | 2  | 4 | 0.3333333 | 0.067      | CLVS2     | TRDN     |
| chr6 | +(129478802..129479388) | 586 | 3.30942 | 7  | 4  | 3 | 0.1428571 | 0.029      | LAMA2     | ARHGAP18 |
| chr6 | +(132859462..132859966) | 504 | 3.30942 | 11 | 6  | 5 | 0.0909091 | 0.07206352 | TAAR9     | TAAR8    |
| chr6 | +(135653044..135653728) | 684 | 0.15779 | 10 | 5  | 5 | 0         | 0.00451172 | MYB       | AHI1     |
| chr6 | +(136469814..136470585) | 771 | 0.68762 | 14 | 6  | 8 | 0.1428571 | 0.00097289 | PDE7B     | FAM54A   |
| chr6 | +(136590473..136590978) | 505 | 3.30942 | 9  | 6  | 3 | 0.3333333 | 0.048      | FAM54A    | BCLAF1   |
| chr6 | +(138835905..138836605) | 700 | 0.15779 | 11 | 5  | 6 | 0.0909091 | 0.05017413 | HEBP2     | NHSL1    |
| chr6 | +(143081149..143081849) | 700 | 1.57131 | 13 | 6  | 7 | 0.0769231 | 0.03164542 | LOC153910 | HIVEP2   |
| chr6 | +(144207622..144208160) | 538 | 3.30942 | 8  | 4  | 4 | 0         | 0.1        | C6orf94   | PLAGL1   |
| chr6 | +(144510208..144510780) | 572 | 1.57131 | 12 | 5  | 7 | 0.1666667 | 0.14557611 | STX11     | UTRN     |
| chr6 | +(146266436..146266978) | 542 | 3.30942 | 8  | 5  | 3 | 0.25      | 0.286      | FBXO30    | SHPRH    |

|      |                         |      |         |    |    |    |           |            |          |              |   |
|------|-------------------------|------|---------|----|----|----|-----------|------------|----------|--------------|---|
| chr6 | +(147123666..147124198) | 532  | 3.30942 | 9  | 3  | 6  | 0.3333333 | 0.012      | C6orf103 | LOC729176    |   |
| chr6 | +(149769260..149769960) | 700  | 0.32535 | 9  | 3  | 6  | 0.3333333 | 0.012      | SUMO4    | ZC3H12D      |   |
| chr6 | +(150004549..150005078) | 529  | 1.57131 | 16 | 10 | 6  | 0.25      | 0.41413127 | KATNA1   | LATS1        |   |
| chr6 | +(150239477..150239989) | 512  | 1.57131 | 17 | 7  | 10 | 0.1764706 | 0.0017074  | RAET1E   | RAET1G       |   |
| chr6 | +(150240468..150241039) | 571  | 1.57131 | 16 | 10 | 6  | 0.25      | 0.09652953 | RAET1E   | RAET1G       |   |
| chr6 | +(150390060..150390635) | 575  | 3.30942 | 8  | 4  | 4  | 0         | 0.443      | RAET1L   | ULBP3        |   |
| chr6 | +(151266298..151266844) | 546  | 0.68762 | 8  | 4  | 4  | 0         | 0.014      | MTHFD1L  | AKAP12       |   |
| chr6 | +(152449934..152450550) | 616  | 0.68762 | 8  | 5  | 3  | 0.25      | 0.018      | ESR1     | SYNE1        |   |
| chr6 | +(152488612..152489312) | 700  | 0.32535 | 11 | 4  | 7  | 0.2727273 | 0.115      | ESR1     | SYNE1        |   |
| chr6 | +(152598914..152599651) | 737  | 0.03399 | 12 | 6  | 6  | 0         | 0.00197388 | ESR1     | SYNE1        |   |
| chr6 | +(158260917..158261605) | 688  | 0.68762 | 8  | 5  | 3  | 0.25      | 0.018      | SNX9     | SYNJ2        |   |
| chr6 | +(158986080..158987102) | 1022 | 0.0008  | 32 | 10 | 22 | 0.375     | 0.03681914 | TMEM181  | DYNLT1       |   |
| chr6 | +(159045388..159045939) | 551  | 3.30942 | 6  | 3  | 3  | 0         | 0.05       | TMEM181  | DYNLT1       |   |
| chr6 | +(159048985..159049623) | 638  | 3.30942 | 6  | 4  | 2  | 0.3333333 | 0.067      | TMEM181  | DYNLT1       |   |
| chr6 | +(159083959..159084499) | 540  | 3.30942 | 6  | 3  | 3  | 0         | 0.05       | SYTL3    | MIR3918      |   |
| chr6 | +(160558016..160558554) | 538  | 3.30942 | 6  | 3  | 3  | 0         | 0.05       | SLC22A1  | SLC22A2      |   |
| chr6 | +(160976739..160977666) | 927  | 3.30942 | 19 | 13 | 6  | 0.3684211 | 0.06798093 | LPAL2    | LPA          |   |
| chr6 | +(161127898..161129291) | 1393 | 0.08917 | 39 | 17 | 22 | 0.1282051 | 0.52258566 | PLG      | MAP3K4       |   |
| chr6 | +(166737774..166738347) | 573  | 0.08005 | 12 | 8  | 4  | 0.3333333 | 0.99671074 | PRR18    | SFT2D1       |   |
| chr6 | +(167591530..167592215) | 685  | 0.50599 | 31 | 20 | 11 | 0.2903226 | 6.1615E-05 | TCP10L2  | UNC93A       |   |
| chr6 | +(167814931..167815633) | 702  | 0.03399 | 17 | 9  | 8  | 0.0588235 | 0.000266   | TCP10    | C6orf123     |   |
| chr6 | +(168139012..168139613) | 601  | 3.30942 | 6  | 2  | 4  | 0.3333333 | 0.067      | TCP10    | C6orf123     |   |
| chr6 | +(168192844..168193463) | 619  | 1.57131 | 7  | 3  | 4  | 0.1428571 | 0.029      | TCP10    | C6orf123     |   |
| chr6 | +(168343795..168344313) | 518  | 1.57131 | 10 | 7  | 3  | 0.4       | 0.058      | MLLT4    | HGC6.3       |   |
| chr6 | +(168365999..168367248) | 1249 | 1.57131 | 13 | 6  | 7  | 0.0769231 | 0.9986501  | MLLT4    | HGC6.3       |   |
| chr6 | +(168376756..168377758) | 1002 | 0.03248 | 47 | 24 | 23 | 0.0212766 | 0.05523257 | MLLT4    | HGC6.3       |   |
| chr6 | +(169008676..169009321) | 645  | 0.68762 | 8  | 3  | 5  | 0.25      | 0.018      | SMOC2    | THBS2        | v |
| chr6 | +(169284458..169285267) | 809  | 0.02086 | 13 | 7  | 6  | 0.0769231 | 0.0013499  | SMOC2    | THBS2        | v |
| chr6 | +(169637042..169637672) | 630  | 3.30942 | 6  | 4  | 2  | 0.3333333 | 0.067      | SMOC2    | THBS2        | v |
| chr6 | +(170615967..170616530) | 563  | 0.68762 | 8  | 5  | 3  | 0.25      | 0.018      | FAM120B  | PSMB1        |   |
| chr6 | +(170765164..170766215) | 1051 | 0.03399 | 18 | 12 | 6  | 0.3333333 | 0.99962648 | FAM120B  | PSMB1        |   |
| chr7 | +(46255..46787)         | 532  | 2.79191 | 6  | 4  | 2  | 0.3333333 | 0.067      |          | FAM20C       |   |
| chr7 | +(178984..179567)       | 583  | 2.79191 | 10 | 6  | 4  | 0.2       | 0.543      |          | FAM20C       |   |
| chr7 | +(297198..297898)       | 700  | 1.18321 | 10 | 3  | 7  | 0.4       | 0.742      | FAM20C   | LOC100288524 |   |

|      |                     |      |         |    |    |    |           |            |          |              |   |
|------|---------------------|------|---------|----|----|----|-----------|------------|----------|--------------|---|
| chr7 | +(301548..302348)   | 800  | 0.00174 | 19 | 9  | 10 | 0.0526316 | 0.00011928 | FAM20C   | LOC100288524 |   |
| chr7 | +(692349..693141)   | 792  | 0.13075 | 15 | 8  | 7  | 0.0666667 | 0.00059687 | FLJ44511 | PRKAR1B      |   |
| chr7 | +(787538..788069)   | 531  | 2.79191 | 7  | 4  | 3  | 0.1428571 | 0.029      | HEATR2   | SUN1         |   |
| chr7 | +(791697..793811)   | 2114 | 0.00691 | 49 | 23 | 26 | 0.0612245 | 0.01242448 | HEATR2   | SUN1         |   |
| chr7 | +(887921..888584)   | 663  | 0.5931  | 13 | 6  | 7  | 0.0769231 | 0.00213737 | SUN1     | GET4         |   |
| chr7 | +(895569..896554)   | 985  | 0.00691 | 22 | 13 | 9  | 0.1818182 | 0.00095082 | SUN1     | GET4         |   |
| chr7 | +(930217..930809)   | 592  | 0.27893 | 12 | 8  | 4  | 0.3333333 | 0.024      | GET4     | ADAP1        |   |
| chr7 | +(948923..949623)   | 700  | 1.18321 | 10 | 3  | 7  | 0.4       | 0.742      | GET4     | ADAP1        |   |
| chr7 | +(1325595..1326184) | 589  | 0.27893 | 13 | 4  | 9  | 0.3846154 | 0.999      | UNCX     | MICALL2      |   |
| chr7 | +(1364385..1365400) | 1015 | 1.18321 | 13 | 7  | 6  | 0.0769231 | 0.9986501  | UNCX     | MICALL2      |   |
| chr7 | +(1458255..1458843) | 588  | 0.02846 | 12 | 5  | 7  | 0.1666667 | 0.00224163 | UNCX     | MICALL2      |   |
| chr7 | +(1481292..1482167) | 875  | 0.05401 | 19 | 13 | 6  | 0.3684211 | 0.78504691 | UNCX     | MICALL2      |   |
| chr7 | +(1672013..1672713) | 700  | 0.05401 | 11 | 5  | 6  | 0.0909091 | 0.00308495 | TFAMP1   | ELFN1        |   |
| chr7 | +(1735380..1736550) | 1170 | 0.13075 | 20 | 8  | 12 | 0.2       | 0.00025847 | TFAMP1   | ELFN1        |   |
| chr7 | +(1780657..1781357) | 700  | 0.13075 | 10 | 3  | 7  | 0.4       | 0.008      | ELFN1    | MAD1L1       | v |
| chr7 | +(1887834..1888351) | 517  | 0.5931  | 11 | 5  | 6  | 0.0909091 | 0.00308495 | ELFN1    | MAD1L1       | v |
| chr7 | +(1933744..1934424) | 680  | 2.79191 | 9  | 6  | 3  | 0.3333333 | 0.988      | ELFN1    | MAD1L1       | v |
| chr7 | +(2017793..2018352) | 559  | 2.79191 | 6  | 2  | 4  | 0.3333333 | 0.067      | ELFN1    | MAD1L1       | v |
| chr7 | +(2076720..2077420) | 700  | 0.02846 | 12 | 8  | 4  | 0.3333333 | 0.99671074 | ELFN1    | MAD1L1       | v |
| chr7 | +(2160848..2161380) | 532  | 0.5931  | 8  | 4  | 4  | 0         | 0.014      | ELFN1    | MAD1L1       | v |
| chr7 | +(2181665..2182317) | 652  | 2.79191 | 6  | 4  | 2  | 0.3333333 | 0.067      | ELFN1    | MAD1L1       | v |
| chr7 | +(2416049..2416749) | 700  | 0.13075 | 10 | 7  | 3  | 0.4       | 0.008      | EIF3B    | CHST12       |   |
| chr7 | +(2556591..2557144) | 553  | 0.5931  | 12 | 8  | 4  | 0.3333333 | 0.715      | LFNG     | C7orf27      |   |
| chr7 | +(2632459..2632968) | 509  | 0.5931  | 9  | 3  | 6  | 0.3333333 | 0.012      | IQCE     | TTYH3        |   |
| chr7 | +(2738774..2739443) | 669  | 2.79191 | 11 | 5  | 6  | 0.0909091 | 0.96605541 | AMZ1     | GNA12        |   |
| chr7 | +(2740685..2741200) | 515  | 1.18321 | 7  | 4  | 3  | 0.1428571 | 0.029      | AMZ1     | GNA12        |   |
| chr7 | +(2910794..2911494) | 700  | 0.13075 | 10 | 7  | 3  | 0.4       | 0.008      | GNA12    | CARD11       |   |
| chr7 | +(2976593..2977392) | 799  | 2.79191 | 12 | 7  | 5  | 0.1666667 | 0.00224163 | GNA12    | CARD11       |   |
| chr7 | +(3995137..3995808) | 671  | 1.18321 | 12 | 7  | 5  | 0.1666667 | 0.00224163 | SDK1     | FOXK1        |   |
| chr7 | +(4167525..4168746) | 1221 | 0.05401 | 31 | 18 | 13 | 0.1612903 | 1.1008E-05 | SDK1     | FOXK1        |   |
| chr7 | +(4245368..4246494) | 1126 | 1.18321 | 15 | 6  | 9  | 0.2       | 0.00335832 | SDK1     | FOXK1        |   |
| chr7 | +(4754620..4755311) | 691  | 0.05401 | 11 | 7  | 4  | 0.2727273 | 0.003      | FOXK1    | KIAA0415     |   |
| chr7 | +(5025888..5026527) | 639  | 1.18321 | 10 | 4  | 6  | 0.2       | 0.005      | RNF216L  | RBAK         |   |
| chr7 | +(5343154..5343771) | 617  | 2.79191 | 6  | 4  | 2  | 0.3333333 | 0.067      | SLC29A4  | TNRC18       |   |

|      |                       |      |         |    |    |    |           |            |              |          |
|------|-----------------------|------|---------|----|----|----|-----------|------------|--------------|----------|
| chr7 | +(5415311..5416011)   | 700  | 0.05401 | 11 | 5  | 6  | 0.0909091 | 0.00308495 | SLC29A4      | TNRC18   |
| chr7 | +(5568014..5568570)   | 556  | 2.79191 | 10 | 6  | 4  | 0.2       | 0.238      | MIR589       | ACTB     |
| chr7 | +(5780835..5781463)   | 628  | 0.01316 | 16 | 9  | 7  | 0.125     | 0.18413054 | FSCN1        | RNF216   |
| chr7 | +(6439460..6439996)   | 536  | 1.18321 | 10 | 7  | 3  | 0.4       | 0.008      | RAC1         | DAGLB    |
| chr7 | +(6620081..6620688)   | 607  | 0.5931  | 13 | 7  | 6  | 0.0769231 | 0.01113549 | ZDHHC4       | C7orf26  |
| chr7 | +(12414120..12414756) | 636  | 1.18321 | 10 | 7  | 3  | 0.4       | 0.017      | TMEM106B     | VWDE     |
| chr7 | +(12728176..12728677) | 501  | 4.30823 | 25 | 8  | 17 | 0.36      | 0.22442991 | ARL4A        | ETV1     |
| chr7 | +(13091224..13091924) | 700  | 2.79191 | 10 | 4  | 6  | 0.2       | 0.995      | ARL4A        | ETV1     |
| chr7 | +(16598370..16598932) | 562  | 0.5931  | 10 | 7  | 3  | 0.4       | 0.033      | LOC100129335 | ANKMY2   |
| chr7 | +(23741446..23741983) | 537  | 2.79191 | 9  | 5  | 4  | 0.1111111 | 0.032      | C7orf46      | STK31    |
| chr7 | +(29989148..29989848) | 700  | 1.18321 | 12 | 5  | 7  | 0.1666667 | 0.99775837 | WIPF3        | SCRN1    |
| chr7 | +(30027804..30028590) | 786  | 1.18321 | 13 | 7  | 6  | 0.0769231 | 0.0013499  | WIPF3        | SCRN1    |
| chr7 | +(30885249..30885911) | 662  | 0.13075 | 10 | 5  | 5  | 0         | 0.00451172 | FAM188B      | AQP1     |
| chr7 | +(33055105..33055620) | 515  | 2.79191 | 10 | 5  | 5  | 0         | 0.0081468  | FKBP9        | NT5C3    |
| chr7 | +(34013889..34014414) | 525  | 2.79191 | 8  | 4  | 4  | 0         | 0.1        | BMPER        | AAA1     |
| chr7 | +(34707481..34708181) | 700  | 0.05401 | 11 | 4  | 7  | 0.2727273 | 0.003      | BMPER        | AAA1     |
| chr7 | +(35919509..35920015) | 506  | 2.79191 | 11 | 6  | 5  | 0.0909091 | 0.18065522 | 41159        | EEPD1    |
| chr7 | +(36005601..36006535) | 934  | 0.5931  | 19 | 8  | 11 | 0.1578947 | 0.00085126 | 41159        | EEPD1    |
| chr7 | +(36193674..36194870) | 1196 | 0.13075 | 18 | 10 | 8  | 0.1111111 | 0.99981036 | EEPD1        | KIAA0895 |
| chr7 | +(36238357..36238906) | 549  | 2.79191 | 6  | 4  | 2  | 0.3333333 | 0.067      | EEPD1        | KIAA0895 |
| chr7 | +(36344834..36345423) | 589  | 0.5931  | 8  | 5  | 3  | 0.25      | 0.018      | EEPD1        | KIAA0895 |
| chr7 | +(36396698..36397319) | 621  | 2.79191 | 12 | 7  | 5  | 0.1666667 | 0.11161257 | EEPD1        | KIAA0895 |
| chr7 | +(36664185..36664712) | 527  | 1.18321 | 7  | 3  | 4  | 0.1428571 | 0.029      | ANLN         | AOAH     |
| chr7 | +(36934138..36934813) | 675  | 1.18321 | 11 | 6  | 5  | 0.0909091 | 0.02230486 | AOAH         | ELMO1    |
| chr7 | +(39873103..39873626) | 523  | 2.79191 | 11 | 6  | 5  | 0.0909091 | 0.07206352 | NCRNA00265   | CDK13    |
| chr7 | +(39893937..39894548) | 611  | 1.18321 | 11 | 4  | 7  | 0.2727273 | 0.324      | NCRNA00265   | CDK13    |
| chr7 | +(40109862..40110561) | 699  | 0.01316 | 13 | 9  | 4  | 0.3846154 | 0.001      | CDK13        | C7orf11  |
| chr7 | +(44116039..44116733) | 694  | 1.18321 | 10 | 7  | 3  | 0.4       | 0.258      | PGAM2        | POLM     |
| chr7 | +(44260996..44262203) | 1207 | 2.79191 | 12 | 4  | 8  | 0.3333333 | 0.00328926 | YKT6         | CAMK2B   |
| chr7 | +(44415531..44416231) | 700  | 0.27893 | 9  | 3  | 6  | 0.3333333 | 0.012      | CAMK2B       | NUDCD3   |
| chr7 | +(44431798..44432474) | 676  | 0.27893 | 10 | 4  | 6  | 0.2       | 0.005      | CAMK2B       | NUDCD3   |
| chr7 | +(45094188..45094755) | 567  | 1.18321 | 7  | 3  | 4  | 0.1428571 | 0.029      | CCM2         | NACAD    |
| chr7 | +(45122730..45123252) | 522  | 2.79191 | 6  | 4  | 2  | 0.3333333 | 0.067      | CCM2         | NACAD    |
| chr7 | +(45143812..45144478) | 666  | 0.5931  | 11 | 6  | 5  | 0.0909091 | 0.01422987 | NACAD        | TBRG4    |

|      |                       |      |         |    |    |    |           |            |              |           |
|------|-----------------------|------|---------|----|----|----|-----------|------------|--------------|-----------|
| chr7 | +(45614743..45615257) | 514  | 0.5931  | 8  | 3  | 5  | 0.25      | 0.018      | ADCY1        | SEPT7P2   |
| chr7 | +(45667017..45667523) | 506  | 0.5931  | 8  | 5  | 3  | 0.25      | 0.018      | ADCY1        | SEPT7P2   |
| chr7 | +(45718985..45719572) | 587  | 1.18321 | 10 | 3  | 7  | 0.4       | 0.333      | ADCY1        | SEPT7P2   |
| chr7 | +(46116472..46117170) | 698  | 2.79191 | 11 | 6  | 5  | 0.0909091 | 0.00308495 | IGFBP3       | TNS3      |
| chr7 | +(47502585..47503271) | 686  | 2.79191 | 6  | 3  | 3  | 0         | 0.05       | IGFBP3       | TNS3      |
| chr7 | +(47548857..47549452) | 595  | 0.13075 | 10 | 5  | 5  | 0         | 0.00451172 | IGFBP3       | TNS3      |
| chr7 | +(48284820..48285457) | 637  | 1.18321 | 10 | 6  | 4  | 0.2       | 0.005      | ABCA13       | CDC14C    |
| chr7 | +(50721707..50722229) | 522  | 1.18321 | 7  | 4  | 3  | 0.1428571 | 0.029      | LOC100129427 | GRB10     |
| chr7 | +(50733556..50734256) | 700  | 0.13075 | 10 | 4  | 6  | 0.2       | 0.005      | LOC100129427 | GRB10     |
| chr7 | +(54609965..54610665) | 700  | 0.5931  | 10 | 3  | 7  | 0.4       | 0.742      | HPVC1        | VSTM2A    |
| chr7 | +(55219108..55219808) | 700  | 0.02846 | 12 | 4  | 8  | 0.3333333 | 0.00328926 | EGFR         | LANCL2    |
| chr7 | +(55345847..55346547) | 700  | 0.13075 | 15 | 10 | 5  | 0.3333333 | 0.00109982 | EGFR         | LANCL2    |
| chr7 | +(55473638..55474328) | 690  | 1.18321 | 7  | 3  | 4  | 0.1428571 | 0.029      | LANCL2       | VOPPI     |
| chr7 | +(55506278..55507035) | 757  | 0.0026  | 17 | 8  | 9  | 0.0588235 | 0.000266   | LANCL2       | VOPPI     |
| chr7 | +(57514394..57515094) | 700  | 0.13075 | 10 | 7  | 3  | 0.4       | 0.008      | ZNF716       | LOC643955 |
| chr7 | +(57545017..57545524) | 507  | 1.18321 | 14 | 6  | 8  | 0.1428571 | 0.65073232 | ZNF716       | LOC643955 |
| chr7 | +(57701440..57701948) | 508  | 1.18321 | 10 | 3  | 7  | 0.4       | 0.008      | ZNF716       | LOC643955 |
| chr7 | +(57706425..57707083) | 658  | 0.5931  | 12 | 4  | 8  | 0.3333333 | 0.715      | ZNF716       | LOC643955 |
| chr7 | +(61073281..61073862) | 581  | 2.79191 | 16 | 5  | 11 | 0.375     | 0.01010547 | ZNF716       | LOC643955 |
| chr7 | +(61744799..61745338) | 539  | 1.49865 | 15 | 5  | 10 | 0.3333333 | 0.0330963  | ZNF716       | LOC643955 |
| chr7 | +(62752098..62752635) | 537  | 1.18321 | 13 | 5  | 8  | 0.2307692 | 0.05367327 | ZNF716       | LOC643955 |
| chr7 | +(62758437..62758969) | 532  | 0.05401 | 22 | 12 | 10 | 0.0909091 | 0.0061114  | ZNF716       | LOC643955 |
| chr7 | +(64274686..64275386) | 700  | 2.79191 | 11 | 5  | 6  | 0.0909091 | 0.99691505 | ZNF138       | LOC168474 |
| chr7 | +(64852724..64853345) | 621  | 2.79191 | 9  | 6  | 3  | 0.3333333 | 0.012      | ZNF92        | INTS4L2   |
| chr7 | +(64863880..64864576) | 696  | 1.18321 | 11 | 7  | 4  | 0.2727273 | 0.158      | ZNF92        | INTS4L2   |
| chr7 | +(70254350..70255264) | 914  | 0.5931  | 15 | 7  | 8  | 0.0666667 | 0.00059687 | AUTS2        | WBSCR17   |
| chr7 | +(72360767..72361272) | 505  | 2.79191 | 9  | 3  | 6  | 0.3333333 | 0.012      | POM121       | NSUN5P2   |
| chr7 | +(72383902..72385155) | 1253 | 1.18321 | 13 | 6  | 7  | 0.0769231 | 0.0013499  | POM121       | NSUN5P2   |
| chr7 | +(72409003..72409546) | 543  | 0.5931  | 13 | 7  | 6  | 0.0769231 | 0.02275014 | POM121       | NSUN5P2   |
| chr7 | +(72415855..72416453) | 598  | 2.79191 | 6  | 4  | 2  | 0.3333333 | 0.067      | POM121       | NSUN5P2   |
| chr7 | +(73100634..73101215) | 581  | 2.79191 | 11 | 5  | 6  | 0.0909091 | 0.13666084 | WBSCR22      | STX1A     |
| chr7 | +(73105011..73105522) | 511  | 0.27893 | 14 | 5  | 9  | 0.2857143 | 0.01938279 | WBSCR22      | STX1A     |
| chr7 | +(73119878..73120578) | 700  | 0.27893 | 10 | 7  | 3  | 0.4       | 0.008      | WBSCR22      | STX1A     |
| chr7 | +(73423753..73424273) | 520  | 0.27893 | 9  | 4  | 5  | 0.1111111 | 0.008      | WBSCR28      | ELN       |

|      |                       |      |         |    |    |    |           |            |          |              |
|------|-----------------------|------|---------|----|----|----|-----------|------------|----------|--------------|
| chr7 | +(73470535..73471046) | 511  | 1.18321 | 8  | 5  | 3  | 0.25      | 0.125      | ELN      | LIMK1        |
| chr7 | +(73474315..73474821) | 506  | 1.18321 | 9  | 6  | 3  | 0.3333333 | 0.024      | ELN      | LIMK1        |
| chr7 | +(73477705..73478239) | 534  | 0.44463 | 18 | 11 | 7  | 0.2222222 | 0.00819715 | ELN      | LIMK1        |
| chr7 | +(73480826..73481398) | 572  | 2.79191 | 6  | 3  | 3  | 0         | 0.05       | ELN      | LIMK1        |
| chr7 | +(73507431..73507950) | 519  | 1.18321 | 7  | 3  | 4  | 0.1428571 | 0.029      | LIMK1    | EIF4H        |
| chr7 | +(73535932..73536480) | 548  | 2.79191 | 6  | 3  | 3  | 0         | 0.05       | LIMK1    | EIF4H        |
| chr7 | +(74162409..74162952) | 543  | 1.18321 | 12 | 7  | 5  | 0.1666667 | 0.01417552 | GTF2I    | NCF1         |
| chr7 | +(74172906..74173591) | 685  | 0.05401 | 22 | 15 | 7  | 0.3636364 | 0.00052306 | GTF2I    | NCF1         |
| chr7 | +(74236898..74237501) | 603  | 1.18321 | 24 | 13 | 11 | 0.0833333 | 0.72851692 | NCF1     | GTF2IRD2     |
| chr7 | +(74300229..74301187) | 958  | 0.03508 | 56 | 30 | 26 | 0.0714286 | 0.0573788  | GTF2IRD2 | STAG3L2      |
| chr7 | +(75441942..75443067) | 1125 | 1.18321 | 14 | 7  | 7  | 0         | 0.99912744 | CCL26    | CCL24        |
| chr7 | +(75695377..75695962) | 585  | 2.79191 | 10 | 6  | 4  | 0.2       | 0.005      | MDH2     | SRRM3        |
| chr7 | +(75757706..75758250) | 544  | 2.79191 | 8  | 3  | 5  | 0.25      | 0.036      | MDH2     | SRRM3        |
| chr7 | +(76142550..76143085) | 535  | 1.18321 | 7  | 3  | 4  | 0.1428571 | 0.029      | UPK3B    | LOC100133091 |
| chr7 | +(76459913..76461014) | 1101 | 0.5931  | 16 | 8  | 8  | 0         | 0.00038877 | POMZP3   | PMS2P11      |
| chr7 | +(76619114..76620109) | 995  | 0.13075 | 21 | 10 | 11 | 0.047619  | 0.00458753 | PMS2P11  | LOC100132832 |
| chr7 | +(78782193..78782893) | 700  | 1.18321 | 11 | 4  | 7  | 0.2727273 | 0.003      | PHTF2    | MAGI2        |
| chr7 | +(80374009..80374531) | 522  | 1.18321 | 11 | 4  | 7  | 0.2727273 | 0.012      | CD36     | SEMA3C       |
| chr7 | +(80678922..80679622) | 700  | 0.05401 | 11 | 4  | 7  | 0.2727273 | 0.003      | SEMA3C   | HGF          |
| chr7 | +(82545789..82546297) | 508  | 2.79191 | 10 | 5  | 5  | 0         | 0.30075407 | CACNA2D1 | PCLO         |
| chr7 | +(82581752..82582288) | 536  | 1.18321 | 12 | 8  | 4  | 0.3333333 | 0.024      | CACNA2D1 | PCLO         |
| chr7 | +(82763710..82765078) | 1368 | 0.00691 | 51 | 25 | 26 | 0.0196078 | 0.29238704 | CACNA2D1 | PCLO         |
| chr7 | +(82784966..82785482) | 516  | 1.18321 | 13 | 6  | 7  | 0.0769231 | 0.04323814 | CACNA2D1 | PCLO         |
| chr7 | +(86994503..86995014) | 511  | 2.79191 | 6  | 4  | 2  | 0.3333333 | 0.067      | CROT     | ABCB4        |
| chr7 | +(89791266..89791774) | 508  | 2.79191 | 10 | 7  | 3  | 0.4       | 0.058      | STEAP1   | STEAP2       |
| chr7 | +(90007182..90007800) | 618  | 1.18321 | 11 | 6  | 5  | 0.0909091 | 0.07206352 | GTPBP10  | CLDN12       |
| chr7 | +(90042469..90043039) | 570  | 0.27893 | 10 | 3  | 7  | 0.4       | 0.008      | CLDN12   | CDK14        |
| chr7 | +(91756633..91757139) | 506  | 0.5931  | 15 | 8  | 7  | 0.0666667 | 0.01394527 | AKAP9    | CYP51A1      |
| chr7 | +(92731749..92732251) | 502  | 2.79191 | 10 | 7  | 3  | 0.4       | 0.192      | CDK6     | SAMD9        |
| chr7 | +(92760798..92761351) | 553  | 2.79191 | 10 | 6  | 4  | 0.2       | 0.238      | SAMD9    | SAMD9L       |
| chr7 | +(94156137..94156986) | 849  | 2.79191 | 12 | 7  | 5  | 0.1666667 | 0.53235847 | CASD1    | SGCE         |
| chr7 | +(94916037..94916689) | 652  | 0.27893 | 23 | 8  | 15 | 0.3043478 | 0.00097289 | PPP1R9A  | PON1         |
| chr7 | +(95606560..95607119) | 559  | 2.79191 | 9  | 4  | 5  | 0.1111111 | 0.032      | DYNC1I1  | SLC25A13     |
| chr7 | +(97598681..97599452) | 771  | 0.13075 | 29 | 14 | 15 | 0.0344828 | 0.0072619  | ASNS     | MGC72080     |



|      |                         |      |         |    |    |    |           |            |             |          |
|------|-------------------------|------|---------|----|----|----|-----------|------------|-------------|----------|
| chr7 | +(98513223..98513770)   | 547  | 2.79191 | 6  | 3  | 3  | 0         | 0.05       | MIR3609     | SMURF1   |
| chr7 | +(98693421..98693997)   | 576  | 2.79191 | 6  | 3  | 3  | 0         | 0.05       | MIR3609     | SMURF1   |
| chr7 | +(98870754..98871454)   | 700  | 1.18321 | 11 | 7  | 4  | 0.2727273 | 0.997      | KPNA7       | MYH16    |
| chr7 | +(99688277..99688857)   | 580  | 2.79191 | 10 | 3  | 7  | 0.4       | 0.667      | COPS6       | MCM7     |
| chr7 | +(99694840..99695471)   | 631  | 0.5931  | 11 | 4  | 7  | 0.2727273 | 0.003      | COPS6       | MCM7     |
| chr7 | +(99704436..99705136)   | 700  | 0.05401 | 16 | 5  | 11 | 0.375     | 0.38850387 | AP4M1       | TAF6     |
| chr7 | +(99794610..99795769)   | 1159 | 0.00691 | 61 | 28 | 33 | 0.0819672 | 0.0011298  | STAG3       | GATS     |
| chr7 | +(100210404..100210934) | 530  | 2.79191 | 6  | 4  | 2  | 0.3333333 | 0.067      | MOSPD3      | TFR2     |
| chr7 | +(100349548..100350101) | 553  | 0.49228 | 35 | 17 | 18 | 0.0285714 | 0.11738184 | ZAN         | EPHB4    |
| chr7 | +(100663776..100664476) | 700  | 0.5931  | 12 | 8  | 4  | 0.3333333 | 0.99671074 | MUC17       | TRIM56   |
| chr7 | +(100684056..100684990) | 934  | 2.79191 | 16 | 11 | 5  | 0.375     | 0.19775658 | MUC17       | TRIM56   |
| chr7 | +(100732967..100733472) | 505  | 2.79191 | 6  | 4  | 2  | 0.3333333 | 0.067      | TRIM56      | SERPINE1 |
| chr7 | +(101041595..101042295) | 700  | 0.05401 | 11 | 7  | 4  | 0.2727273 | 0.003      | EMID2       | MYL10    |
| chr7 | +(101242265..101242965) | 700  | 1.18321 | 10 | 4  | 6  | 0.2       | 0.871      | EMID2       | MYL10    |
| chr7 | +(101287410..101288053) | 643  | 0.13075 | 11 | 5  | 6  | 0.0909091 | 0.00308495 | MYL10       | CUX1     |
| chr7 | +(101481623..101482808) | 1185 | 0.27893 | 20 | 11 | 9  | 0.1       | 8.472E-05  | CUX1        | SH2B2    |
| chr7 | +(101913473..101914498) | 1025 | 0.5931  | 14 | 8  | 6  | 0.1428571 | 0.99902711 | CUX1        | SH2B2    |
| chr7 | +(101952081..101952781) | 700  | 0.02846 | 16 | 5  | 11 | 0.375     | 0.07837268 | MIR4285     | SPDYE6   |
| chr7 | +(101989077..101989582) | 505  | 1.18321 | 10 | 7  | 3  | 0.4       | 0.992      | MIR4285     | SPDYE6   |
| chr7 | +(102230526..102231129) | 603  | 0.49228 | 24 | 11 | 13 | 0.0833333 | 7.3868E-05 | SPDYE2_dup1 | RASA4    |
| chr7 | +(102236241..102236753) | 512  | 2.79191 | 13 | 4  | 9  | 0.3846154 | 0.074      | SPDYE2_dup1 | RASA4    |
| chr7 | +(102251494..102252020) | 526  | 2.79191 | 10 | 7  | 3  | 0.4       | 0.667      | SPDYE2_dup1 | RASA4    |
| chr7 | +(102389485..102389999) | 514  | 2.79191 | 10 | 6  | 4  | 0.2       | 0.057      | FAM185A     | FBXL13   |
| chr7 | +(102450655..102451739) | 1084 | 0.5931  | 14 | 6  | 8  | 0.1428571 | 0.00097289 | FAM185A     | FBXL13   |
| chr7 | +(102962850..102963357) | 507  | 0.5931  | 10 | 7  | 3  | 0.4       | 0.092      | PMPCB       | DNAJC2   |
| chr7 | +(104783442..104783953) | 511  | 2.79191 | 9  | 4  | 5  | 0.1111111 | 0.095      | MLL5        | SRPK2    |
| chr7 | +(104829555..104830933) | 1378 | 0.5931  | 15 | 7  | 8  | 0.0666667 | 0.99940313 | MLL5        | SRPK2    |
| chr7 | +(104971841..104972870) | 1029 | 1.18321 | 13 | 6  | 7  | 0.0769231 | 0.0013499  | MLL5        | SRPK2    |
| chr7 | +(105445674..105446355) | 681  | 2.79191 | 9  | 6  | 3  | 0.3333333 | 0.012      | EFCAB10     | ATXN7L1  |
| chr7 | +(105517336..105517947) | 611  | 0.5931  | 8  | 3  | 5  | 0.25      | 0.018      | ATXN7L1     | CDHR3    |
| chr7 | +(106509681..106510200) | 519  | 2.79191 | 6  | 2  | 4  | 0.3333333 | 0.067      | PIK3CG      | PRKAR2B  |
| chr7 | +(106938425..106938931) | 506  | 2.79191 | 8  | 4  | 4  | 0         | 0.029      | HBP1        | COG5     |
| chr7 | +(107571471..107572228) | 757  | 0.00691 | 17 | 7  | 10 | 0.1764706 | 0.0006399  | DLD         | LAMB1    |
| chr7 | +(117289876..117290398) | 522  | 1.18321 | 7  | 3  | 4  | 0.1428571 | 0.029      | CFTR        | CTTNBP2  |

|      |                         |      |         |    |    |    |           |            |              |          |   |
|------|-------------------------|------|---------|----|----|----|-----------|------------|--------------|----------|---|
| chr7 | +(117431653..117432277) | 624  | 0.27893 | 17 | 6  | 11 | 0.2941176 | 0.00448627 | CFTR         | CTTNBP2  |   |
| chr7 | +(124404691..124405212) | 521  | 0.13075 | 10 | 5  | 5  | 0         | 0.00451172 | TMEM229A     | GPR37    |   |
| chr7 | +(127975613..127976217) | 604  | 0.01316 | 22 | 12 | 10 | 0.0909091 | 0.00150257 | LEP          | RBM28    |   |
| chr7 | +(128452004..128453088) | 1084 | 0.5931  | 19 | 7  | 12 | 0.2631579 | 0.02126124 | CCDC136      | FLNC     |   |
| chr7 | +(128767327..128767832) | 505  | 2.79191 | 6  | 2  | 4  | 0.3333333 | 0.067      | LOC407835    | TSPAN33  |   |
| chr7 | +(131191204..131191705) | 501  | 2.79191 | 6  | 3  | 3  | 0         | 0.05       | MKLN1        | PODXL    |   |
| chr7 | +(131192368..131193068) | 700  | 2.79191 | 11 | 5  | 6  | 0.0909091 | 0.99691505 | MKLN1        | PODXL    |   |
| chr7 | +(131574087..131575402) | 1315 | 1.18321 | 13 | 7  | 6  | 0.0769231 | 0.9986501  | PODXL        | PLXNA4   |   |
| chr7 | +(131814601..131815551) | 950  | 0.5931  | 17 | 11 | 6  | 0.2941176 | 0.00045556 | PODXL        | PLXNA4   |   |
| chr7 | +(132070891..132071591) | 700  | 0.02846 | 12 | 6  | 6  | 0         | 0.00197388 | PODXL        | PLXNA4   |   |
| chr7 | +(133087469..133087977) | 508  | 1.18321 | 10 | 3  | 7  | 0.4       | 0.008      | EXOC4        | LRGUK    |   |
| chr7 | +(133830051..133830751) | 700  | 0.27893 | 9  | 6  | 3  | 0.3333333 | 0.012      | LRGUK        | SLC35B4  |   |
| chr7 | +(134618332..134618889) | 557  | 2.79191 | 15 | 7  | 8  | 0.0666667 | 0.5        | CALD1        | AGBL3    |   |
| chr7 | +(134632176..134632704) | 528  | 0.01316 | 13 | 7  | 6  | 0.0769231 | 0.0013499  | CALD1        | AGBL3    |   |
| chr7 | +(135386203..135386724) | 521  | 2.79191 | 9  | 3  | 6  | 0.3333333 | 0.048      | PL-5283      | SLC13A4  |   |
| chr7 | +(136622860..136623462) | 602  | 1.18321 | 13 | 4  | 9  | 0.3846154 | 0.999      | MIR490       | PTN      |   |
| chr7 | +(137792109..137792629) | 520  | 2.79191 | 6  | 4  | 2  | 0.3333333 | 0.067      | AKR1D1       | TRIM24   |   |
| chr7 | +(138088277..138088803) | 526  | 2.79191 | 12 | 6  | 6  | 0         | 0.02733197 | AKR1D1       | TRIM24   |   |
| chr7 | +(138188890..138189547) | 657  | 2.79191 | 9  | 6  | 3  | 0.3333333 | 0.012      | TRIM24       | SVOPL    |   |
| chr7 | +(138330407..138331079) | 672  | 1.18321 | 7  | 4  | 3  | 0.1428571 | 0.029      | TRIM24       | SVOPL    |   |
| chr7 | +(138587793..138588534) | 741  | 0.01316 | 15 | 10 | 5  | 0.3333333 | 0.0330963  | TMEM213      | KIAA1549 |   |
| chr7 | +(139164044..139165129) | 1085 | 0.13075 | 17 | 6  | 11 | 0.2941176 | 0.8861     | LOC100129148 | KLRG2    |   |
| chr7 | +(139704295..139704995) | 700  | 0.01316 | 13 | 4  | 9  | 0.3846154 | 0.001      | TBXAS1       | PARP12   |   |
| chr7 | +(139826462..139827162) | 700  | 0.13075 | 12 | 4  | 8  | 0.3333333 | 0.00328926 | PARP12       | JHDM1D   |   |
| chr7 | +(140300828..140301367) | 539  | 2.79191 | 10 | 4  | 6  | 0.2       | 0.129      | MKRN1        | DENND2A  |   |
| chr7 | +(141095659..141096290) | 631  | 2.79191 | 6  | 3  | 3  | 0         | 0.05       | LOC100131199 | AGK      |   |
| chr7 | +(141490395..141490898) | 503  | 1.18321 | 15 | 5  | 10 | 0.3333333 | 0.54873837 | TAS2R5       | PRSS37   |   |
| chr7 | +(142479475..142480146) | 671  | 0.02846 | 12 | 8  | 4  | 0.3333333 | 0.99671074 | TRY6         | PRSS2    |   |
| chr7 | +(143021252..143021806) | 554  | 0.27893 | 13 | 6  | 7  | 0.0769231 | 0.03164542 | CLCN1        | FAM131B  |   |
| chr7 | +(143086735..143087320) | 585  | 1.18321 | 7  | 4  | 3  | 0.1428571 | 0.029      | ZYX          | EPHA1    | v |
| chr7 | +(143094274..143094817) | 543  | 0.13075 | 12 | 5  | 7  | 0.1666667 | 0.18587565 | ZYX          | EPHA1    | v |
| chr7 | +(143792185..143792718) | 533  | 2.79191 | 9  | 3  | 6  | 0.3333333 | 0.083      | OR2A25       | OR2A12   |   |
| chr7 | +(144060288..144060813) | 525  | 1.88159 | 32 | 14 | 18 | 0.125     | 0.00438241 | ARHGEF5      | NOBOX    |   |
| chr7 | +(148946652..148947476) | 824  | 0.5931  | 14 | 8  | 6  | 0.1428571 | 0.00491164 | ZNF212       | ZNF783   |   |

|      |                         |      |         |    |    |    |           |            |              |              |
|------|-------------------------|------|---------|----|----|----|-----------|------------|--------------|--------------|
| chr7 | +(149424482..149425182) | 700  | 2.79191 | 11 | 5  | 6  | 0.0909091 | 0.00308495 | KRBA1        | ZNF467       |
| chr7 | +(149494560..149495109) | 549  | 0.27893 | 9  | 5  | 4  | 0.1111111 | 0.008      | SSPO         | ZNF862       |
| chr7 | +(149505309..149506009) | 700  | 0.27893 | 9  | 3  | 6  | 0.3333333 | 0.012      | SSPO         | ZNF862       |
| chr7 | +(149519420..149519953) | 533  | 1.18321 | 8  | 5  | 3  | 0.25      | 0.125      | SSPO         | ZNF862       |
| chr7 | +(150673874..150674416) | 542  | 2.79191 | 6  | 2  | 4  | 0.3333333 | 0.067      | ABP1         | KCNH2        |
| chr7 | +(150697505..150698045) | 540  | 2.79191 | 9  | 3  | 6  | 0.3333333 | 0.452      | NOS3         | ATG9B        |
| chr7 | +(150768887..150769499) | 612  | 2.79191 | 6  | 2  | 4  | 0.3333333 | 0.067      | SLC4A2       | FASTK        |
| chr7 | +(150819455..150820096) | 641  | 1.18321 | 7  | 4  | 3  | 0.1428571 | 0.029      | AGAP3        | GBX1         |
| chr7 | +(151093960..151094660) | 700  | 0.13075 | 10 | 7  | 3  | 0.4       | 0.008      | NUB1         | WDR86        |
| chr7 | +(151134353..151135053) | 700  | 1.18321 | 11 | 7  | 4  | 0.2727273 | 0.003      | LOC100131176 | CRYGN        |
| chr7 | +(151269474..151269992) | 518  | 2.79191 | 9  | 5  | 4  | 0.1111111 | 0.032      | RHEB         | PRKAG2       |
| chr7 | +(151335853..151336889) | 1036 | 0.5931  | 14 | 8  | 6  | 0.1428571 | 0.00097289 | RHEB         | PRKAG2       |
| chr7 | +(151879054..151879697) | 643  | 1.18321 | 12 | 7  | 5  | 0.1666667 | 0.53235847 | GALNT11      | MLL3         |
| chr7 | +(151902082..151902715) | 633  | 1.18321 | 9  | 6  | 3  | 0.3333333 | 0.048      | GALNT11      | MLL3         |
| chr7 | +(151918687..151919281) | 594  | 1.18321 | 11 | 5  | 6  | 0.0909091 | 0.01422987 | GALNT11      | MLL3         |
| chr7 | +(152513598..152514110) | 512  | 1.18321 | 11 | 7  | 4  | 0.2727273 | 0.006      | ACTR3B       | DPP6         |
| chr7 | +(153855756..153856351) | 595  | 0.5931  | 8  | 4  | 4  | 0         | 0.014      | DPP6         | LOC100132707 |
| chr7 | +(154187318..154187853) | 535  | 2.79191 | 6  | 3  | 3  | 0         | 0.05       | DPP6         | LOC100132707 |
| chr7 | +(154702543..154703504) | 961  | 0.13075 | 20 | 14 | 6  | 0.4       | 0.000266   | DPP6         | LOC100132707 |
| chr7 | +(157224663..157225211) | 548  | 1.18321 | 7  | 3  | 4  | 0.1428571 | 0.029      | DNAJB6       | PTPRN2       |
| chr7 | +(157264517..157265153) | 636  | 0.13075 | 10 | 3  | 7  | 0.4       | 0.008      | DNAJB6       | PTPRN2       |
| chr7 | +(157334262..157334962) | 700  | 1.18321 | 11 | 4  | 7  | 0.2727273 | 0.997      | DNAJB6       | PTPRN2       |
| chr7 | +(157413838..157414453) | 615  | 0.5931  | 9  | 5  | 4  | 0.1111111 | 0.008      | DNAJB6       | PTPRN2       |
| chr7 | +(157500540..157501401) | 861  | 0.0026  | 18 | 9  | 9  | 0         | 0.00017429 | DNAJB6       | PTPRN2       |
| chr7 | +(157506989..157508166) | 1177 | 0.27893 | 17 | 9  | 8  | 0.0588235 | 0.999734   | DNAJB6       | PTPRN2       |
| chr7 | +(157623478..157624178) | 700  | 2.79191 | 10 | 4  | 6  | 0.2       | 0.005      | DNAJB6       | PTPRN2       |
| chr7 | +(157735202..157735705) | 503  | 2.79191 | 6  | 4  | 2  | 0.3333333 | 0.067      | DNAJB6       | PTPRN2       |
| chr7 | +(157756931..157758131) | 1200 | 1.18321 | 13 | 7  | 6  | 0.0769231 | 0.9986501  | DNAJB6       | PTPRN2       |
| chr7 | +(157860355..157861486) | 1131 | 0.13075 | 17 | 7  | 10 | 0.1764706 | 0.99968185 | DNAJB6       | PTPRN2       |
| chr7 | +(157869799..157870434) | 635  | 1.18321 | 8  | 5  | 3  | 0.25      | 0.125      | DNAJB6       | PTPRN2       |
| chr7 | +(157958854..157959734) | 880  | 0.01316 | 18 | 7  | 11 | 0.2222222 | 0.00216645 | DNAJB6       | PTPRN2       |
| chr7 | +(158140737..158141842) | 1105 | 0.01316 | 21 | 9  | 12 | 0.1428571 | 0.33490768 | DNAJB6       | PTPRN2       |
| chr7 | +(158248613..158249313) | 700  | 1.18321 | 11 | 5  | 6  | 0.0909091 | 0.00308495 | DNAJB6       | PTPRN2       |
| chr7 | +(158672198..158672739) | 541  | 2.79191 | 6  | 3  | 3  | 0         | 0.05       | WDR60        | LOC154822    |

|      |                         |      |         |    |    |    |           |            |           |                 |   |
|------|-------------------------|------|---------|----|----|----|-----------|------------|-----------|-----------------|---|
| chr7 | +(158821895..158822442) | 547  | 1.18321 | 7  | 3  | 4  | 0.1428571 | 0.029      | VIPR2     |                 |   |
| chr8 | +(232913..233613)       | 700  | 0.02297 | 12 | 4  | 8  | 0.3333333 | 0.00328926 | ZNF596    | FBXO25          |   |
| chr8 | +(408154..408712)       | 558  | 2.46595 | 8  | 5  | 3  | 0.25      | 0.036      | FBXO25    | C8orf42         |   |
| chr8 | +(640092..640696)       | 604  | 2.46595 | 6  | 3  | 3  | 0         | 0.05       | C8orf42   | ERICH1          |   |
| chr8 | +(677478..678327)       | 849  | 0.47176 | 15 | 7  | 8  | 0.0666667 | 0.00059687 | C8orf42   | ERICH1          |   |
| chr8 | +(751100..752281)       | 1181 | 0.47176 | 18 | 7  | 11 | 0.2222222 | 0.99783355 | ERICH1    | LOC286083       |   |
| chr8 | +(1130662..1131214)     | 552  | 1.07955 | 7  | 3  | 4  | 0.1428571 | 0.029      | ERICH1    | LOC286083       |   |
| chr8 | +(1206020..1206829)     | 809  | 0.00017 | 18 | 7  | 11 | 0.2222222 | 0.0002444  | ERICH1    | LOC286083       |   |
| chr8 | +(1269197..1269805)     | 608  | 0.10114 | 17 | 10 | 7  | 0.1764706 | 0.68720738 | LOC286083 | DLGAP2          |   |
| chr8 | +(1286871..1287980)     | 1109 | 1.07955 | 14 | 7  | 7  | 0         | 0.98732634 | LOC286083 | DLGAP2          |   |
| chr8 | +(1472823..1473521)     | 698  | 1.07955 | 12 | 7  | 5  | 0.1666667 | 0.99775837 | DLGAP2    | CLN8            |   |
| chr8 | +(1496416..1497076)     | 660  | 1.07955 | 11 | 4  | 7  | 0.2727273 | 0.003      | DLGAP2    | CLN8            |   |
| chr8 | +(1724308..1725008)     | 700  | 1.07955 | 10 | 3  | 7  | 0.4       | 0.992      | CLN8      | MIR596          |   |
| chr8 | +(2003429..2004128)     | 699  | 0.23896 | 9  | 6  | 3  | 0.3333333 | 0.012      | MYOM2     | CSMD1           |   |
| chr8 | +(2196703..2197272)     | 569  | 2.46595 | 6  | 2  | 4  | 0.3333333 | 0.067      | MYOM2     | CSMD1           |   |
| chr8 | +(2225225..2225925)     | 700  | 0.04466 | 15 | 5  | 10 | 0.3333333 | 0.80436636 | MYOM2     | CSMD1           |   |
| chr8 | +(3216141..3217226)     | 1085 | 1.07955 | 13 | 6  | 7  | 0.0769231 | 0.9986501  | MYOM2     | CSMD1           |   |
| chr8 | +(3951582..3952282)     | 700  | 0.23896 | 13 | 9  | 4  | 0.3846154 | 0.999      | MYOM2     | CSMD1           |   |
| chr8 | +(5146047..5146927)     | 880  | 0.00982 | 13 | 6  | 7  | 0.0769231 | 0.0013499  | CSMD1     | MCPH1           |   |
| chr8 | +(7190581..7191785)     | 1204 | 0.00184 | 34 | 20 | 14 | 0.1764706 | 0.86098912 | FAM90A20  | FAM66B          |   |
| chr8 | +(7195461..7196158)     | 697  | 0.25246 | 35 | 23 | 12 | 0.3142857 | 0.01194461 | FAM90A20  | FAM66B          |   |
| chr8 | +(7199378..7200035)     | 657  | 0.04466 | 12 | 7  | 5  | 0.1666667 | 0.00224163 | FAM90A20  | FAM66B          |   |
| chr8 | +(7835071..7835640)     | 569  | 2.46595 | 11 | 4  | 7  | 0.2727273 | 0.206      | FAM66E    | DEFB109P1B_dup2 |   |
| chr8 | +(8234234..8234849)     | 615  | 0.04466 | 15 | 10 | 5  | 0.3333333 | 0.0330963  | FLJ10661  | SGK223          |   |
| chr8 | +(8348304..8349004)     | 700  | 0.47176 | 12 | 4  | 8  | 0.3333333 | 0.00328926 | SGK223    | CLDN23          |   |
| chr8 | +(8873660..8874225)     | 565  | 2.46595 | 7  | 3  | 4  | 0.1428571 | 0.029      | ERI1      | PPP1R3B         |   |
| chr8 | +(10466424..10467049)   | 625  | 0.10114 | 12 | 7  | 5  | 0.1666667 | 0.28488218 | PRSS55    | RP1L1           |   |
| chr8 | +(10467135..10467982)   | 847  | 0.00297 | 23 | 15 | 8  | 0.3043478 | 0.02640376 | PRSS55    | RP1L1           |   |
| chr8 | +(11420567..11421158)   | 591  | 2.46595 | 9  | 3  | 6  | 0.3333333 | 0.726      | BLK       | GATA4           | v |
| chr8 | +(11554718..11555317)   | 599  | 1.07955 | 7  | 4  | 3  | 0.1428571 | 0.029      | BLK       | GATA4           | v |
| chr8 | +(11593641..11594535)   | 894  | 0.00297 | 21 | 8  | 13 | 0.2380952 | 8.2983E-05 | GATA4     | NEIL2           | v |
| chr8 | +(11614228..11614918)   | 690  | 1.07955 | 9  | 5  | 4  | 0.1111111 | 0.095      | GATA4     | NEIL2           | v |
| chr8 | +(12232522..12233072)   | 550  | 0.23896 | 14 | 5  | 9  | 0.2857143 | 0.00981533 | FAM66A    | DEFB109P1       |   |
| chr8 | +(12283041..12284015)   | 974  | 0.0104  | 61 | 31 | 30 | 0.0163934 | 3.422E-05  | FAM90A25P | FAM86B2         |   |

|      |                       |      |         |    |    |    |           |            |           |            |
|------|-----------------------|------|---------|----|----|----|-----------|------------|-----------|------------|
| chr8 | +(12286329..12287002) | 673  | 0.25246 | 31 | 19 | 12 | 0.2258065 | 0.00371808 | FAM90A25P | FAM86B2    |
| chr8 | +(13218206..13218906) | 700  | 0.23896 | 9  | 6  | 3  | 0.3333333 | 0.012      | C8orf79   | DLC1       |
| chr8 | +(13356984..13357556) | 572  | 2.46595 | 8  | 5  | 3  | 0.25      | 0.393      | C8orf79   | DLC1       |
| chr8 | +(17488335..17489008) | 673  | 2.46595 | 9  | 4  | 5  | 0.1111111 | 0.857      | PDGFRL    | MTUS1      |
| chr8 | +(18079319..18080019) | 700  | 0.04508 | 18 | 11 | 7  | 0.2222222 | 0.00216645 | NAT1      | NAT2       |
| chr8 | +(19440050..19440750) | 700  | 0.00982 | 13 | 4  | 9  | 0.3846154 | 0.001      | SH2D4A    | CSGALNACT1 |
| chr8 | +(21956572..21957114) | 542  | 1.07955 | 12 | 6  | 6  | 0         | 0.02733197 | FAM160B2  | NUDT18     |
| chr8 | +(21987000..21987682) | 682  | 1.07955 | 7  | 3  | 4  | 0.1428571 | 0.029      | NUDT18    | HR         |
| chr8 | +(21991940..21992640) | 700  | 0.23896 | 13 | 4  | 9  | 0.3846154 | 0.999      | HR        | REEP4      |
| chr8 | +(22005242..22005795) | 553  | 1.07955 | 7  | 4  | 3  | 0.1428571 | 0.029      | REEP4     | LGI3       |
| chr8 | +(22461962..22462526) | 564  | 2.46595 | 12 | 6  | 6  | 0         | 0.00197388 | C8orf58   | KIAA1967   |
| chr8 | +(22477730..22478335) | 605  | 0.23896 | 9  | 4  | 5  | 0.1111111 | 0.008      | KIAA1967  | BIN3       |
| chr8 | +(22575821..22576496) | 675  | 1.07955 | 7  | 3  | 4  | 0.1428571 | 0.029      | EGR3      | PEBP4      |
| chr8 | +(22974224..22974725) | 501  | 2.46595 | 10 | 5  | 5  | 0         | 0.0081468  | TNFRSF10C | TNFRSF10D  |
| chr8 | +(23057057..23057843) | 786  | 0.23896 | 17 | 9  | 8  | 0.0588235 | 0.000266   | TNFRSF10D | TNFRSF10A  |
| chr8 | +(23240341..23240956) | 615  | 1.07955 | 8  | 5  | 3  | 0.25      | 0.018      | R3HCC1    | LOXL2      |
| chr8 | +(27155799..27156434) | 635  | 0.10114 | 10 | 6  | 4  | 0.2       | 0.005      | STMN4     | TRIM35     |
| chr8 | +(27641298..27641814) | 516  | 2.46595 | 6  | 3  | 3  | 0         | 0.05       | ESCO2     | PBK        |
| chr8 | +(27737099..27737682) | 583  | 2.46595 | 6  | 3  | 3  | 0         | 0.05       | PBK       | SCARA5     |
| chr8 | +(28207532..28208232) | 700  | 0.23896 | 12 | 6  | 6  | 0         | 0.5        | PNOC      | ZNF395     |
| chr8 | +(28360506..28361025) | 519  | 0.47176 | 13 | 8  | 5  | 0.2307692 | 0.18988774 | FZD3      | MIR4288    |
| chr8 | +(28633194..28634114) | 920  | 0.10114 | 17 | 10 | 7  | 0.1764706 | 0.00031815 | EXTL3     | INTS9      |
| chr8 | +(30942618..30943159) | 541  | 2.46595 | 12 | 6  | 6  | 0         | 0.13116584 | WRN       | NRG1       |
| chr8 | +(33360796..33361315) | 519  | 2.46595 | 13 | 4  | 9  | 0.3846154 | 0.47       | MAK16     | C8orf41    |
| chr8 | +(35382738..35383273) | 535  | 2.46595 | 11 | 5  | 6  | 0.0909091 | 0.70805879 | UNC5D     | KCNU1      |
| chr8 | +(36408387..36409086) | 699  | 2.46595 | 9  | 6  | 3  | 0.3333333 | 0.988      | UNC5D     | KCNU1      |
| chr8 | +(36793101..36793634) | 533  | 2.46595 | 7  | 3  | 4  | 0.1428571 | 0.029      | KCNU1     | ZNF703     |
| chr8 | +(37472507..37473102) | 595  | 0.10114 | 10 | 5  | 5  | 0         | 0.00451172 | KCNU1     | ZNF703     |
| chr8 | +(37601618..37602645) | 1027 | 0.23896 | 17 | 7  | 10 | 0.1764706 | 0.99910455 | ERLIN2    | LOC728024  |
| chr8 | +(37645118..37646066) | 948  | 0.02297 | 18 | 6  | 12 | 0.3333333 | 0.00037352 | PROSC     | GPR124     |
| chr8 | +(37678239..37678798) | 559  | 2.46595 | 6  | 4  | 2  | 0.3333333 | 0.067      | GPR124    | BRF2       |
| chr8 | +(37718883..37719491) | 608  | 0.10114 | 10 | 7  | 3  | 0.4       | 0.008      | BRF2      | RAB11FIP1  |
| chr8 | +(37731879..37732534) | 655  | 0.23896 | 10 | 6  | 4  | 0.2       | 0.019      | BRF2      | RAB11FIP1  |
| chr8 | +(37762369..37762945) | 576  | 2.46595 | 6  | 3  | 3  | 0         | 0.05       | RAB11FIP1 | GOT1L1     |

|      |                       |      |         |    |    |   |           |            |              |               |
|------|-----------------------|------|---------|----|----|---|-----------|------------|--------------|---------------|
| chr8 | +(37901123..37902268) | 1145 | 0.47176 | 14 | 7  | 7 | 0         | 0.98732634 | EIF4EBP1     | ASH2L         |
| chr8 | +(38066352..38067029) | 677  | 0.47176 | 10 | 5  | 5 | 0         | 0.05859256 | BAG4         | DDHD2         |
| chr8 | +(39775520..39776056) | 536  | 2.46595 | 6  | 3  | 3 | 0         | 0.05       | IDO1         | IDO2          |
| chr8 | +(41552394..41552925) | 531  | 2.46595 | 6  | 4  | 2 | 0.3333333 | 0.067      | NKX6-3       | ANK1          |
| chr8 | +(41685417..41686101) | 684  | 0.00982 | 13 | 6  | 7 | 0.0769231 | 0.0013499  | NKX6-3       | ANK1          |
| chr8 | +(42182220..42182858) | 638  | 1.07955 | 9  | 3  | 6 | 0.3333333 | 0.012      | IKBKB        | POLB          |
| chr8 | +(42292098..42293230) | 1132 | 2.46595 | 15 | 10 | 5 | 0.3333333 | 0.99284706 | VDAC3        | SLC20A2       |
| chr8 | +(42587101..42587669) | 568  | 2.46595 | 9  | 5  | 4 | 0.1111111 | 0.032      | CHRNA3       | CHRNA6        |
| chr8 | +(42828042..42828552) | 510  | 2.46595 | 9  | 3  | 6 | 0.3333333 | 0.452      | HOOK3        | FNTA          |
| chr8 | +(48641516..48642043) | 527  | 2.46595 | 12 | 7  | 5 | 0.1666667 | 0.08373231 | KIAA0146     | CEBPD         |
| chr8 | +(48744395..48744910) | 515  | 2.46595 | 7  | 3  | 4 | 0.1428571 | 0.029      | CEBPD        | PRKDC         |
| chr8 | +(48887041..48887741) | 700  | 0.47176 | 13 | 4  | 9 | 0.3846154 | 0.207      | MCM4         | UBE2V2        |
| chr8 | +(51786222..51787448) | 1226 | 0.47176 | 14 | 8  | 6 | 0.1428571 | 0.99902711 | SNTG1        | PXDNL         |
| chr8 | +(52665168..52665868) | 700  | 0.10114 | 11 | 4  | 7 | 0.2727273 | 0.003      | SNTG1        | PXDNL         |
| chr8 | +(53084538..53085065) | 527  | 2.46595 | 8  | 4  | 4 | 0         | 0.014      | PCMTD1       | ST18          |
| chr8 | +(54642258..54642958) | 700  | 0.23896 | 9  | 6  | 3 | 0.3333333 | 0.012      | OPRK1        | ATP6V1H       |
| chr8 | +(56675227..56675736) | 509  | 1.07955 | 8  | 4  | 4 | 0         | 0.057      | SBF1P1       | TMEM68        |
| chr8 | +(56698852..56699452) | 600  | 0.47176 | 9  | 4  | 5 | 0.1111111 | 0.008      | TGS1         | LYN           |
| chr8 | +(59059716..59060247) | 531  | 2.46595 | 11 | 5  | 6 | 0.0909091 | 0.42756607 | FAM110B      | UBXN2B        |
| chr8 | +(61693702..61694213) | 511  | 1.07955 | 9  | 6  | 3 | 0.3333333 | 0.274      | CHD7         | LOC100130298  |
| chr8 | +(63662816..63663469) | 653  | 0.47176 | 8  | 3  | 5 | 0.25      | 0.018      | NKAIN3       | LOC643763     |
| chr8 | +(63985171..63985695) | 524  | 1.07955 | 7  | 4  | 3 | 0.1428571 | 0.029      | GGH          | TTPA          |
| chr8 | +(64048686..64049280) | 594  | 0.47176 | 9  | 4  | 5 | 0.1111111 | 0.008      | TTPA         | YTHDF3        |
| chr8 | +(66651555..66652117) | 562  | 1.07955 | 8  | 5  | 3 | 0.25      | 0.018      | MTFR1        | PDE7A         |
| chr8 | +(67755501..67756013) | 512  | 2.46595 | 8  | 3  | 5 | 0.25      | 0.018      | PTTG3P       | C8orf45       |
| chr8 | +(72942029..72942704) | 675  | 0.47176 | 12 | 8  | 4 | 0.3333333 | 0.596      | LOC100132891 | TRPA1         |
| chr8 | +(73117369..73117887) | 518  | 2.46595 | 9  | 5  | 4 | 0.1111111 | 0.056      | TRPA1        | LOC392232     |
| chr8 | +(73926000..73926504) | 504  | 0.47176 | 13 | 8  | 5 | 0.2307692 | 0.0017074  | TERF1        | C8orf84       |
| chr8 | +(77775833..77776452) | 619  | 2.46595 | 9  | 3  | 6 | 0.3333333 | 0.988      | ZFHX4        | PEX2          |
| chr8 | +(80548939..80549533) | 594  | 1.07955 | 10 | 7  | 3 | 0.4       | 0.133      | STMN2        | HEY1          |
| chr8 | +(81430689..81431201) | 512  | 2.46595 | 8  | 5  | 3 | 0.25      | 0.125      | ZBTB10       | ZNF704        |
| chr8 | +(81507012..81507517) | 505  | 2.46595 | 10 | 5  | 5 | 0         | 0.08726268 | ZBTB10       | ZNF704        |
| chr8 | +(86389108..86389757) | 649  | 2.46595 | 9  | 4  | 5 | 0.1111111 | 0.008      | CA2          | REXO1L2P_dup1 |
| chr8 | +(87755534..87756092) | 558  | 1.07955 | 8  | 4  | 4 | 0         | 0.014      | CPNE3        | CNGB3         |

|      |                         |      |         |     |     |     |           |            |         |           |   |
|------|-------------------------|------|---------|-----|-----|-----|-----------|------------|---------|-----------|---|
| chr8 | +(92085760..92086457)   | 697  | 0.10114 | 10  | 6   | 4   | 0.2       | 0.005      | OTUD6B  | LRRC69    |   |
| chr8 | +(92114751..92115421)   | 670  | 0.02297 | 14  | 5   | 9   | 0.2857143 | 0.0020741  | OTUD6B  | LRRC69    |   |
| chr8 | +(92147731..92148232)   | 501  | 2.46595 | 7   | 3   | 4   | 0.1428571 | 0.029      | LRRC69  | SLC26A7   |   |
| chr8 | +(92170792..92171313)   | 521  | 0.10114 | 15  | 8   | 7   | 0.0666667 | 0.01031878 | LRRC69  | SLC26A7   |   |
| chr8 | +(95448571..95449146)   | 575  | 0.47176 | 12  | 8   | 4   | 0.3333333 | 0.036      | GEM     | RAD54B    | v |
| chr8 | +(95879119..95879620)   | 501  | 2.46595 | 7   | 3   | 4   | 0.1428571 | 0.2        | INTS8   | CCNE2     |   |
| chr8 | +(98698690..98699203)   | 513  | 2.46595 | 10  | 4   | 6   | 0.2       | 0.033      | MTDH    | LAPTM4B   |   |
| chr8 | +(98700900..98701763)   | 863  | 1.07955 | 14  | 7   | 7   | 0         | 0.00087256 | MTDH    | LAPTM4B   |   |
| chr8 | +(98993133..98994447)   | 1314 | 0.04466 | 17  | 11  | 6   | 0.2941176 | 0.99954444 | MATN2   | RPL30     |   |
| chr8 | +(99242721..99243421)   | 700  | 1.07955 | 10  | 3   | 7   | 0.4       | 0.008      | POP1    | NIPAL2    |   |
| chr8 | +(99662320..99663253)   | 933  | 0.47176 | 14  | 5   | 9   | 0.2857143 | 0.0013499  | KCNS2   | STK3      |   |
| chr8 | +(99961341..99962002)   | 661  | 0.47176 | 9   | 5   | 4   | 0.1111111 | 0.008      | OSR2    | VPS13B    | v |
| chr8 | +(100578569..100579186) | 617  | 2.46595 | 7   | 4   | 3   | 0.1428571 | 0.029      | MIR875  | COX6C     |   |
| chr8 | +(101075601..101076110) | 509  | 0.97106 | 19  | 10  | 9   | 0.0526316 | 0.0604097  | COX6C   | RGS22     |   |
| chr8 | +(101196389..101197088) | 699  | 2.46595 | 9   | 3   | 6   | 0.3333333 | 0.988      | SPAG1   | RNF19A    |   |
| chr8 | +(101281923..101282433) | 510  | 2.46595 | 6   | 2   | 4   | 0.3333333 | 0.067      | SPAG1   | RNF19A    |   |
| chr8 | +(101470337..101470847) | 510  | 0.02297 | 12  | 4   | 8   | 0.3333333 | 0.00328926 | RNF19A  | ANKRD46   |   |
| chr8 | +(110509031..110509547) | 516  | 2.46595 | 7   | 4   | 3   | 0.1428571 | 0.114      | PKHD1L1 | EBAG9     |   |
| chr8 | +(117862605..117863135) | 530  | 1.07955 | 10  | 4   | 6   | 0.2       | 0.01       | UTP23   | RAD21     |   |
| chr8 | +(118169758..118170267) | 509  | 2.5843  | 14  | 6   | 8   | 0.1428571 | 0.00491164 | SLC30A8 | MED30     |   |
| chr8 | +(124266332..124267032) | 700  | 1.07955 | 13  | 6   | 7   | 0.0769231 | 0.38754848 | C8orf76 | ZHX1      |   |
| chr8 | +(125565179..125566120) | 941  | 2.46595 | 12  | 6   | 6   | 0         | 0.00197388 | NDUFB9  | MTSS1     |   |
| chr8 | +(125636285..125636985) | 700  | 1.07955 | 11  | 4   | 7   | 0.2727273 | 0.003      | NDUFB9  | MTSS1     |   |
| chr8 | +(126448388..126448985) | 597  | 2.46595 | 7   | 4   | 3   | 0.1428571 | 0.314      | TRIB1   | FAM84B    |   |
| chr8 | +(126653823..126654483) | 660  | 2.46595 | 6   | 2   | 4   | 0.3333333 | 0.067      | TRIB1   | FAM84B    |   |
| chr8 | +(126776377..126777077) | 700  | 2.46595 | 9   | 3   | 6   | 0.3333333 | 0.988      | TRIB1   | FAM84B    |   |
| chr8 | +(127521993..127522607) | 614  | 2.46595 | 6   | 3   | 3   | 0         | 0.05       | TRIB1   | FAM84B    |   |
| chr8 | +(128427893..128429629) | 1736 | 4.2E-34 | 453 | 231 | 222 | 0.0198675 | 0.77966238 | POU5F1B | LOC727677 |   |
| chr8 | +(128833191..128834269) | 1078 | 2.46595 | 12  | 6   | 6   | 0         | 0.99802612 | MIR1204 | MIR1205   |   |
| chr8 | +(130993090..130993790) | 700  | 1.07955 | 12  | 5   | 7   | 0.1666667 | 0.99775837 | FAM49B  | ASAP1     |   |
| chr8 | +(130994834..130995381) | 547  | 0.47176 | 8   | 4   | 4   | 0         | 0.014      | FAM49B  | ASAP1     |   |
| chr8 | +(131022983..131023683) | 700  | 0.23896 | 9   | 3   | 6   | 0.3333333 | 0.012      | FAM49B  | ASAP1     |   |
| chr8 | +(131063635..131064284) | 649  | 0.23896 | 9   | 4   | 5   | 0.1111111 | 0.008      | FAM49B  | ASAP1     |   |
| chr8 | +(131068624..131069275) | 651  | 1.07955 | 11  | 7   | 4   | 0.2727273 | 0.997      | FAM49B  | ASAP1     |   |

|      |                         |      |         |    |    |    |           |            |          |            |
|------|-------------------------|------|---------|----|----|----|-----------|------------|----------|------------|
| chr8 | +(131098270..131098802) | 532  | 2.46595 | 6  | 3  | 3  | 0         | 0.05       | FAM49B   | ASAP1      |
| chr8 | +(133363676..133364291) | 615  | 2.46595 | 6  | 3  | 3  | 0         | 0.05       | HHLA1    | KCNQ3      |
| chr8 | +(133426037..133426737) | 700  | 0.10114 | 15 | 10 | 5  | 0.3333333 | 0.99890018 | HHLA1    | KCNQ3      |
| chr8 | +(133504841..133505826) | 985  | 0.23896 | 17 | 8  | 9  | 0.0588235 | 0.000266   | KCNQ3    | HPYR1      |
| chr8 | +(134237587..134238278) | 691  | 2.46595 | 9  | 6  | 3  | 0.3333333 | 0.012      | WISP1    | NDRG1      |
| chr8 | +(134296198..134296759) | 561  | 2.46595 | 10 | 5  | 5  | 0         | 0.94140744 | WISP1    | NDRG1      |
| chr8 | +(134368228..134368844) | 616  | 0.47176 | 8  | 4  | 4  | 0         | 0.014      | NDRG1    | ST3GAL1    |
| chr8 | +(134471940..134472490) | 550  | 1.07955 | 12 | 7  | 5  | 0.1666667 | 0.28488218 | NDRG1    | ST3GAL1    |
| chr8 | +(134496974..134497555) | 581  | 2.46595 | 6  | 2  | 4  | 0.3333333 | 0.067      | NDRG1    | ST3GAL1    |
| chr8 | +(134623251..134624237) | 986  | 2.46595 | 12 | 6  | 6  | 0         | 0.99802612 | ST3GAL1  | ZFAT       |
| chr8 | +(135141162..135142194) | 1032 | 0.23896 | 15 | 9  | 6  | 0.2       | 0.00073136 | ST3GAL1  | ZFAT       |
| chr8 | +(135470503..135471399) | 896  | 0.00063 | 23 | 10 | 13 | 0.1304348 | 2.7755E-05 | ST3GAL1  | ZFAT       |
| chr8 | +(139726106..139726672) | 566  | 0.47176 | 8  | 4  | 4  | 0         | 0.014      | FAM135B  | COL22A1    |
| chr8 | +(140613030..140613730) | 700  | 0.23896 | 10 | 5  | 5  | 0         | 0.00451172 | COL22A1  | KCNK9      |
| chr8 | +(140669282..140669805) | 523  | 2.46595 | 6  | 4  | 2  | 0.3333333 | 0.067      | COL22A1  | KCNK9      |
| chr8 | +(140694110..140694807) | 697  | 2.46595 | 13 | 9  | 4  | 0.3846154 | 0.999      | COL22A1  | KCNK9      |
| chr8 | +(140749699..140750237) | 538  | 0.47176 | 9  | 6  | 3  | 0.3333333 | 0.083      | KCNK9    | TRAPPC9    |
| chr8 | +(140755246..140755875) | 629  | 0.23896 | 9  | 4  | 5  | 0.1111111 | 0.008      | KCNK9    | TRAPPC9    |
| chr8 | +(140845452..140846152) | 700  | 0.00011 | 19 | 13 | 6  | 0.3684211 | 0.0003125  | KCNK9    | TRAPPC9    |
| chr8 | +(141047958..141048628) | 670  | 2.46595 | 6  | 3  | 3  | 0         | 0.05       | KCNK9    | TRAPPC9    |
| chr8 | +(141057785..141058379) | 594  | 0.10114 | 10 | 5  | 5  | 0         | 0.00451172 | KCNK9    | TRAPPC9    |
| chr8 | +(141060287..141060940) | 653  | 2.46595 | 6  | 3  | 3  | 0         | 0.05       | KCNK9    | TRAPPC9    |
| chr8 | +(141079703..141080403) | 700  | 0.02297 | 12 | 5  | 7  | 0.1666667 | 0.00224163 | KCNK9    | TRAPPC9    |
| chr8 | +(141562235..141562935) | 700  | 0.02297 | 12 | 8  | 4  | 0.3333333 | 0.99671074 | CHRAC1   | EIF2C2     |
| chr8 | +(141588461..141588980) | 519  | 0.23896 | 9  | 5  | 4  | 0.1111111 | 0.008      | CHRAC1   | EIF2C2     |
| chr8 | +(141615329..141615982) | 653  | 2.46595 | 9  | 6  | 3  | 0.3333333 | 0.548      | CHRAC1   | EIF2C2     |
| chr8 | +(142186338..142186953) | 615  | 0.10114 | 10 | 7  | 3  | 0.4       | 0.008      | DENND3   | SLC45A4    |
| chr8 | +(142194922..142195622) | 700  | 0.10114 | 10 | 6  | 4  | 0.2       | 0.005      | DENND3   | SLC45A4    |
| chr8 | +(142490539..142491209) | 670  | 0.47176 | 8  | 4  | 4  | 0         | 0.014      | PTP4A3   | FLJ43860   |
| chr8 | +(142559073..142559757) | 684  | 2.46595 | 9  | 6  | 3  | 0.3333333 | 0.274      | FLJ43860 | NCRNA00051 |
| chr8 | +(142595258..142596163) | 905  | 2.46595 | 14 | 5  | 9  | 0.2857143 | 0.36944134 | FLJ43860 | NCRNA00051 |
| chr8 | +(142686324..142686984) | 660  | 0.23896 | 9  | 3  | 6  | 0.3333333 | 0.012      | FLJ43860 | NCRNA00051 |
| chr8 | +(142729280..142730693) | 1413 | 0.23896 | 23 | 10 | 13 | 0.1304348 | 0.85412612 | FLJ43860 | NCRNA00051 |
| chr8 | +(142823425..142823986) | 561  | 1.07955 | 7  | 3  | 4  | 0.1428571 | 0.029      | FLJ43860 | NCRNA00051 |



|      |                         |      |         |    |    |    |           |            |              |              |
|------|-------------------------|------|---------|----|----|----|-----------|------------|--------------|--------------|
| chr8 | +(142867159..142867859) | 700  | 0.47176 | 11 | 6  | 5  | 0.0909091 | 0.02230486 | FLJ43860     | NCRNA00051   |
| chr8 | +(142974749..142975449) | 700  | 0.23896 | 10 | 3  | 7  | 0.4       | 0.008      | FLJ43860     | NCRNA00051   |
| chr8 | +(143023346..143023912) | 566  | 2.46595 | 6  | 4  | 2  | 0.3333333 | 0.067      | FLJ43860     | NCRNA00051   |
| chr8 | +(143058964..143059952) | 988  | 2.46595 | 12 | 6  | 6  | 0         | 0.00197388 | FLJ43860     | NCRNA00051   |
| chr8 | +(143100353..143101053) | 700  | 0.04466 | 11 | 7  | 4  | 0.2727273 | 0.003      | FLJ43860     | NCRNA00051   |
| chr8 | +(143104774..143105333) | 559  | 2.46595 | 9  | 3  | 6  | 0.3333333 | 0.988      | FLJ43860     | NCRNA00051   |
| chr8 | +(143241596..143242102) | 506  | 1.07955 | 7  | 3  | 4  | 0.1428571 | 0.029      | FLJ43860     | NCRNA00051   |
| chr8 | +(143277785..143278325) | 540  | 1.07955 | 7  | 3  | 4  | 0.1428571 | 0.029      | FLJ43860     | NCRNA00051   |
| chr8 | +(143319694..143320286) | 592  | 2.46595 | 6  | 4  | 2  | 0.3333333 | 0.067      | NCRNA00051   | TSNARE1      |
| chr8 | +(143363547..143364172) | 625  | 0.47176 | 8  | 5  | 3  | 0.25      | 0.018      | NCRNA00051   | TSNARE1      |
| chr8 | +(143369652..143370175) | 523  | 1.07955 | 7  | 4  | 3  | 0.1428571 | 0.029      | NCRNA00051   | TSNARE1      |
| chr8 | +(143498582..143499161) | 579  | 1.07955 | 7  | 4  | 3  | 0.1428571 | 0.029      | TSNARE1      | BAI1         |
| chr8 | +(143573068..143573647) | 579  | 0.47176 | 12 | 8  | 4  | 0.3333333 | 0.99671074 | BAI1         | ARC          |
| chr8 | +(143582486..143583015) | 529  | 2.46595 | 6  | 2  | 4  | 0.3333333 | 0.067      | BAI1         | ARC          |
| chr8 | +(143615899..143616445) | 546  | 0.23896 | 9  | 4  | 5  | 0.1111111 | 0.008      | BAI1         | ARC          |
| chr8 | +(143630071..143630771) | 700  | 0.04466 | 11 | 6  | 5  | 0.0909091 | 0.00308495 | BAI1         | ARC          |
| chr8 | +(143636238..143636938) | 700  | 0.00982 | 13 | 9  | 4  | 0.3846154 | 0.001      | BAI1         | ARC          |
| chr8 | +(143644837..143645462) | 625  | 2.46595 | 11 | 5  | 6  | 0.0909091 | 0.94982587 | BAI1         | ARC          |
| chr8 | +(143691976..143692671) | 695  | 2.46595 | 10 | 6  | 4  | 0.2       | 0.995      | BAI1         | ARC          |
| chr8 | +(143759819..143760613) | 794  | 0.00184 | 16 | 6  | 10 | 0.25      | 0.00056905 | PSCA         | LY6K         |
| chr8 | +(143816417..143817105) | 688  | 0.23896 | 13 | 9  | 4  | 0.3846154 | 0.001      | C8orf55      | SLURP1       |
| chr8 | +(144095043..144095550) | 507  | 0.47176 | 8  | 3  | 5  | 0.25      | 0.018      | CYP11B2      | LOC100133669 |
| chr8 | +(144095797..144096950) | 1153 | 1.07955 | 16 | 5  | 11 | 0.375     | 0.85908964 | CYP11B2      | LOC100133669 |
| chr8 | +(144296517..144297343) | 826  | 0.00011 | 21 | 12 | 9  | 0.1428571 | 0.00053949 | GPIHBP1      | ZFP41        |
| chr8 | +(144354307..144355073) | 766  | 0.00982 | 13 | 7  | 6  | 0.0769231 | 0.0013499  | GLI4         | ZNF696       |
| chr8 | +(144458360..144458924) | 564  | 0.04466 | 12 | 7  | 5  | 0.1666667 | 0.00224163 | RHPN1        | MAFA         |
| chr8 | +(144462377..144463005) | 628  | 1.07955 | 7  | 4  | 3  | 0.1428571 | 0.029      | RHPN1        | MAFA         |
| chr8 | +(144505569..144506269) | 700  | 0.00017 | 22 | 8  | 14 | 0.2727273 | 6.6151E-05 | RHPN1        | MAFA         |
| chr8 | +(144653668..144654368) | 700  | 0.47176 | 10 | 3  | 7  | 0.4       | 0.742      | GSDMD        | C8orf73      |
| chr8 | +(144662549..144663060) | 511  | 2.46595 | 9  | 3  | 6  | 0.3333333 | 0.083      | NAPRT1       | EEF1D        |
| chr8 | +(144667677..144668272) | 595  | 2.46595 | 6  | 3  | 3  | 0         | 0.05       | NAPRT1       | EEF1D        |
| chr8 | +(144776456..144777069) | 613  | 2.46595 | 6  | 4  | 2  | 0.3333333 | 0.067      | ZNF707       | BREA2        |
| chr8 | +(144778623..144779208) | 585  | 0.10114 | 10 | 7  | 3  | 0.4       | 0.008      | ZNF707       | BREA2        |
| chr8 | +(144795107..144795807) | 700  | 1.07955 | 10 | 7  | 3  | 0.4       | 0.992      | LOC100130274 | MAPK15       |

|      |                         |      |         |    |    |    |           |            |          |           |   |
|------|-------------------------|------|---------|----|----|----|-----------|------------|----------|-----------|---|
| chr8 | +(144799111..144799905) | 794  | 1.07955 | 13 | 7  | 6  | 0.0769231 | 0.15865525 | MAPK15   | FAM83H    |   |
| chr8 | +(144917317..144917873) | 556  | 0.23896 | 9  | 4  | 5  | 0.1111111 | 0.008      | PUF60    | NRBP2     |   |
| chr8 | +(145030744..145031340) | 596  | 2.46595 | 6  | 4  | 2  | 0.3333333 | 0.067      | EPPK1    | PLEC      |   |
| chr8 | +(145057724..145058304) | 580  | 2.46595 | 6  | 4  | 2  | 0.3333333 | 0.067      | MIR661   | PARP10    |   |
| chr8 | +(145150968..145151491) | 523  | 2.46595 | 6  | 2  | 4  | 0.3333333 | 0.067      | CYC1     | SHARPIN   |   |
| chr8 | +(145254746..145255446) | 700  | 0.10114 | 12 | 8  | 4  | 0.3333333 | 0.533      | HEATR7A  | SCXA_dup1 |   |
| chr8 | +(145534408..145534941) | 533  | 2.46595 | 12 | 6  | 6  | 0         | 0.99802612 | HSF1     | DGAT1     |   |
| chr8 | +(145558388..145559459) | 1071 | 0.04466 | 18 | 12 | 6  | 0.3333333 | 0.00744336 | DGAT1    | SCRT1     |   |
| chr8 | +(145632868..145633434) | 566  | 2.46595 | 11 | 5  | 6  | 0.0909091 | 0.05017413 | ADCK5    | CPSF1     |   |
| chr8 | +(145637185..145637964) | 779  | 0.00011 | 23 | 11 | 12 | 0.0434783 | 0.03241909 | MIR1234  | SLC39A4   |   |
| chr8 | +(145649871..145651124) | 1253 | 0.10114 | 17 | 6  | 11 | 0.2941176 | 0.9966722  | SLC39A4  | VPS28     |   |
| chr8 | +(145735949..145736544) | 595  | 0.23896 | 9  | 5  | 4  | 0.1111111 | 0.008      | MFSD3    | RECQL4    |   |
| chr8 | +(145775956..145776487) | 531  | 1.07955 | 7  | 4  | 3  | 0.1428571 | 0.029      | MGC70857 | ARHGAP39  |   |
| chr8 | +(145779889..145780589) | 700  | 0.02297 | 13 | 9  | 4  | 0.3846154 | 0.001      | MGC70857 | ARHGAP39  |   |
| chr8 | +(145783507..145784207) | 700  | 0.04466 | 11 | 5  | 6  | 0.0909091 | 0.00308495 | MGC70857 | ARHGAP39  |   |
| chr8 | +(145806026..145806725) | 699  | 0.23896 | 13 | 4  | 9  | 0.3846154 | 0.001      | MGC70857 | ARHGAP39  |   |
| chr8 | +(145903974..145904479) | 505  | 2.46595 | 6  | 2  | 4  | 0.3333333 | 0.067      | ARHGAP39 | ZNF251    |   |
| chr9 | +(354204..355020)       | 816  | 7.5E-05 | 32 | 18 | 14 | 0.125     | 8.4923E-07 | DOCK8    | KANK1     |   |
| chr9 | +(390211..390720)       | 509  | 3.54521 | 9  | 4  | 5  | 0.1111111 | 0.278      | DOCK8    | KANK1     |   |
| chr9 | +(1959988..1960688)     | 700  | 0.06099 | 12 | 4  | 8  | 0.3333333 | 0.00328926 | DMRT2    | SMARCA2   |   |
| chr9 | +(2191096..2191618)     | 522  | 3.54521 | 6  | 3  | 3  | 0         | 0.05       | SMARCA2  | FLJ35024  |   |
| chr9 | +(2838290..2838834)     | 544  | 1.65224 | 8  | 5  | 3  | 0.25      | 0.018      | KCNV2    | KIAA0020  |   |
| chr9 | +(6507103..6507839)     | 736  | 0.0022  | 17 | 11 | 6  | 0.2941176 | 0.00045556 | UHRF2    | GLDC      | v |
| chr9 | +(6577974..6579097)     | 1123 | 0.43546 | 15 | 6  | 9  | 0.2       | 0.00073136 | UHRF2    | GLDC      | v |
| chr9 | +(8834877..8835577)     | 700  | 0.93087 | 9  | 3  | 6  | 0.3333333 | 0.012      | C9orf123 | PTPRD     |   |
| chr9 | +(10651150..10651698)   | 548  | 1.65224 | 7  | 3  | 4  | 0.1428571 | 0.029      | PTPRD    | TYRP1     |   |
| chr9 | +(12657623..12658323)   | 700  | 3.54521 | 10 | 4  | 6  | 0.2       | 0.995      | PTPRD    | TYRP1     |   |
| chr9 | +(16106857..16107557)   | 700  | 0.06099 | 12 | 5  | 7  | 0.1666667 | 0.00224163 | C9orf93  | BNC2      |   |
| chr9 | +(16668030..16668558)   | 528  | 3.54521 | 6  | 2  | 4  | 0.3333333 | 0.067      | C9orf93  | BNC2      |   |
| chr9 | +(16713457..16714141)   | 684  | 3.54521 | 6  | 3  | 3  | 0         | 0.05       | C9orf93  | BNC2      |   |
| chr9 | +(17415846..17416358)   | 512  | 3.54521 | 8  | 4  | 4  | 0         | 0.014      | CNTLN    | SH3GL2    |   |
| chr9 | +(19102556..19103256)   | 700  | 0.21815 | 15 | 5  | 10 | 0.3333333 | 0.99890018 | RRAGA    | HAUS6     |   |
| chr9 | +(20413579..20414587)   | 1008 | 3.54521 | 26 | 10 | 16 | 0.2307692 | 0.29908073 | SLC24A2  | MLLT3     |   |
| chr9 | +(21206074..21206586)   | 512  | 3.54521 | 12 | 5  | 7  | 0.1666667 | 0.00926649 | IFNA7    | IFNA10    |   |

|      |                       |      |         |    |    |    |           |            |              |                   |
|------|-----------------------|------|---------|----|----|----|-----------|------------|--------------|-------------------|
| chr9 | +(21206950..21207519) | 569  | 1.65224 | 17 | 8  | 9  | 0.0588235 | 0.03375409 | IFNA7        | IFNA10            |
| chr9 | +(21217074..21217593) | 519  | 3.54521 | 11 | 4  | 7  | 0.2727273 | 0.006      | IFNA10       | IFNA16            |
| chr9 | +(21409269..21409771) | 502  | 3.54521 | 13 | 8  | 5  | 0.2307692 | 0.23210716 | IFNA8        | IFNA1             |
| chr9 | +(32549977..32550677) | 700  | 3.54521 | 11 | 6  | 5  | 0.0909091 | 0.00308495 | DDX58        | TOPORS            |
| chr9 | +(33797452..33798227) | 775  | 0.0022  | 25 | 8  | 17 | 0.36      | 0.01798855 | PRSS3        | UBE2R2            |
| chr9 | +(34234003..34234596) | 593  | 1.65224 | 10 | 3  | 7  | 0.4       | 0.092      | UBAP1        | KIF24             |
| chr9 | +(34570288..34571754) | 1466 | 0.01435 | 22 | 14 | 8  | 0.2727273 | 0.99993385 | ENHO         | CNTFR             |
| chr9 | +(34834094..34834931) | 837  | 2.13968 | 40 | 24 | 16 | 0.2       | 0.0031363  | C9orf144B    | C9orf144          |
| chr9 | +(34835054..34835560) | 506  | 3.54521 | 12 | 6  | 6  | 0         | 0.05465729 | C9orf144B    | C9orf144          |
| chr9 | +(35377011..35377711) | 700  | 3.54521 | 9  | 3  | 6  | 0.3333333 | 0.274      | UNC13B       | ATP8B5P           |
| chr9 | +(35605397..35606544) | 1147 | 0.93087 | 16 | 10 | 6  | 0.25      | 0.99538163 | TESK1        | CD72              |
| chr9 | +(35697559..35698259) | 700  | 0.06099 | 15 | 5  | 10 | 0.3333333 | 0.00242438 | TPM2         | TLN1              |
| chr9 | +(35737671..35738178) | 507  | 3.54521 | 6  | 2  | 4  | 0.3333333 | 0.067      | CREB3        | GBA2              |
| chr9 | +(36724715..36725352) | 637  | 3.54521 | 6  | 2  | 4  | 0.3333333 | 0.067      | MELK         | PAX5              |
| chr9 | +(36800009..36800536) | 527  | 0.93087 | 8  | 5  | 3  | 0.25      | 0.018      | MELK         | PAX5              |
| chr9 | +(36835766..36836624) | 858  | 0.06099 | 12 | 6  | 6  | 0         | 0.00197388 | MELK         | PAX5              |
| chr9 | +(36873844..36874544) | 700  | 0.11433 | 11 | 7  | 4  | 0.2727273 | 0.003      | MELK         | PAX5              |
| chr9 | +(36891196..36891698) | 502  | 3.54521 | 9  | 6  | 3  | 0.3333333 | 0.917      | MELK         | PAX5              |
| chr9 | +(37024440..37025051) | 611  | 0.11433 | 11 | 4  | 7  | 0.2727273 | 0.003      | MELK         | PAX5              |
| chr9 | +(37440801..37441368) | 567  | 3.54521 | 9  | 5  | 4  | 0.1111111 | 0.452      | GRHPR        | ZBTB5             |
| chr9 | +(37887577..37888188) | 611  | 0.06099 | 18 | 6  | 12 | 0.3333333 | 0.01561431 | DCAF10       | MCART1            |
| chr9 | +(37997630..37998160) | 530  | 3.54521 | 7  | 4  | 3  | 0.1428571 | 0.029      | MCART1       | SHB               |
| chr9 | +(38003191..38003722) | 531  | 1.65224 | 7  | 4  | 3  | 0.1428571 | 0.029      | MCART1       | SHB               |
| chr9 | +(38018623..38019323) | 700  | 0.43546 | 14 | 5  | 9  | 0.2857143 | 0.9986501  | MCART1       | SHB               |
| chr9 | +(38397998..38398525) | 527  | 3.54521 | 13 | 6  | 7  | 0.0769231 | 0.0013499  | ALDH1B1      | IGFBPL1           |
| chr9 | +(38441804..38442408) | 604  | 3.54521 | 6  | 2  | 4  | 0.3333333 | 0.067      | IGFBPL1      | ANKRD18A          |
| chr9 | +(38488554..38489102) | 548  | 0.93087 | 8  | 4  | 4  | 0         | 0.014      | IGFBPL1      | ANKRD18A          |
| chr9 | +(38619715..38620248) | 533  | 1.65224 | 8  | 4  | 4  | 0         | 0.014      | IGFBPL1      | ANKRD18A          |
| chr9 | +(39890054..39890583) | 529  | 0.93087 | 18 | 9  | 9  | 0         | 0.00592447 | FAM75A2_dup2 | FAM74A1           |
| chr9 | +(40772617..40773377) | 760  | 0.21815 | 39 | 22 | 17 | 0.1282051 | 0.06666885 | FAM74A3      | ZNF658            |
| chr9 | +(41591713..41592270) | 557  | 3.54521 | 19 | 12 | 7  | 0.2631579 | 0.82372893 | FAM75A5_dup2 | LOC653501_dup2    |
| chr9 | +(65617426..65617941) | 515  | 1.84713 | 46 | 22 | 24 | 0.0434783 | 0.03568014 | FAM75A7_dup3 | LOC442421         |
| chr9 | +(66500309..66500914) | 605  | 3.54521 | 14 | 8  | 6  | 0.1428571 | 0.96464942 | LOC442421    | LOC100133920_dup1 |
| chr9 | +(66513516..66514715) | 1199 | 1.65224 | 27 | 14 | 13 | 0.037037  | 0.34893059 | LOC442421    | LOC100133920_dup1 |

|      |                       |      |         |     |    |    |           |            |                   |                   |
|------|-----------------------|------|---------|-----|----|----|-----------|------------|-------------------|-------------------|
| chr9 | +(66516755..66517257) | 502  | 3.85533 | 23  | 11 | 12 | 0.0434783 | 0.01561612 | LOC442421         | LOC100133920_dup1 |
| chr9 | +(66837026..66837641) | 615  | 3.54521 | 6   | 4  | 2  | 0.3333333 | 0.067      | LOC442421         | LOC100133920_dup1 |
| chr9 | +(67938494..67939157) | 663  | 0.43546 | 15  | 9  | 6  | 0.2       | 0.00335832 | ANKRD20A3_dup3    | LOC642236         |
| chr9 | +(68435506..68436118) | 612  | 1.65224 | 9   | 3  | 6  | 0.3333333 | 0.024      | ANKRD20A3_dup3    | LOC642236         |
| chr9 | +(68455294..68455893) | 599  | 1.65224 | 10  | 7  | 3  | 0.4       | 0.008      | LOC642236         | LOC100132352      |
| chr9 | +(69067538..69068146) | 608  | 3.26016 | 26  | 8  | 18 | 0.3846154 | 0.00530092 | LOC100132352      | PGM5P2            |
| chr9 | +(69081857..69082358) | 501  | 1.65224 | 11  | 5  | 6  | 0.0909091 | 0.18065522 | LOC100132352      | PGM5P2            |
| chr9 | +(69381708..69382608) | 900  | 1.65224 | 19  | 12 | 7  | 0.2631579 | 0.00019287 | CBWD6             | ANKRD20A4         |
| chr9 | +(70176190..70176701) | 511  | 3.54521 | 10  | 6  | 4  | 0.2       | 0.033      | LOC100133920_dup2 | FOXD4L5           |
| chr9 | +(70428507..70429304) | 797  | 0.21815 | 26  | 17 | 9  | 0.3076923 | 0.00233044 | FOXD4L5           | FOXD4L2_dup2      |
| chr9 | +(70482815..70483770) | 955  | 0.01946 | 54  | 25 | 29 | 0.0740741 | 2.4258E-06 | FOXD4L4_dup2      | CBWD3_dup1        |
| chr9 | +(70484150..70484652) | 502  | 1.91123 | 69  | 46 | 23 | 0.3333333 | 3.767E-05  | FOXD4L4_dup2      | CBWD3_dup1        |
| chr9 | +(70486408..70486958) | 550  | 3.26016 | 34  | 16 | 18 | 0.0588235 | 0.00259687 | FOXD4L4_dup2      | CBWD3_dup1        |
| chr9 | +(70488471..70489464) | 993  | 2.69852 | 52  | 29 | 23 | 0.1153846 | 0.15766002 | FOXD4L4_dup2      | CBWD3_dup1        |
| chr9 | +(70862214..70862924) | 710  | 0.22442 | 112 | 60 | 52 | 0.0714286 | 5.5511E-17 | CBWD3_dup2        | FOXD4L3           |
| chr9 | +(70871600..70872297) | 697  | 0.02892 | 32  | 21 | 11 | 0.3125    | 2.8233E-05 | CBWD3_dup2        | FOXD4L3           |
| chr9 | +(71668990..71669503) | 513  | 0.93087 | 8   | 4  | 4  | 0         | 0.014      | FXN               | TJP2              |
| chr9 | +(71731288..71731988) | 700  | 1.65224 | 10  | 7  | 3  | 0.4       | 0.992      | FXN               | TJP2              |
| chr9 | +(74804998..74805555) | 557  | 0.93087 | 8   | 4  | 4  | 0         | 0.014      | GDA               | ZFAND5            |
| chr9 | +(75393672..75394193) | 521  | 1.65224 | 7   | 4  | 3  | 0.1428571 | 0.029      | TMC1              | ALDH1A1           |
| chr9 | +(75420050..75420599) | 549  | 3.54521 | 9   | 4  | 5  | 0.1111111 | 0.095      | TMC1              | ALDH1A1           |
| chr9 | +(77353915..77354426) | 511  | 0.21815 | 15  | 5  | 10 | 0.3333333 | 0.00164431 | RORB              | TRPM6             |
| chr9 | +(79933157..79933678) | 521  | 3.54521 | 6   | 3  | 3  | 0         | 0.05       | VPS13A            | GNA14             |
| chr9 | +(80157705..80158379) | 674  | 3.54521 | 10  | 6  | 4  | 0.2       | 0.995      | VPS13A            | GNA14             |
| chr9 | +(84558337..84558853) | 516  | 2.28983 | 17  | 6  | 11 | 0.2941176 | 0.00599235 | FAM75D4           | FAM75D3           |
| chr9 | +(84560161..84561283) | 1122 | 1.65224 | 46  | 31 | 15 | 0.3478261 | 0.10079032 | FAM75D3           | FAM75D1           |
| chr9 | +(84562134..84562642) | 508  | 3.54521 | 14  | 6  | 8  | 0.1428571 | 0.84915021 | FAM75D3           | FAM75D1           |
| chr9 | +(84606847..84607483) | 636  | 0.43546 | 12  | 8  | 4  | 0.3333333 | 0.014      | FAM75D1           | RASEF             |
| chr9 | +(84607697..84608504) | 807  | 0.93087 | 18  | 12 | 6  | 0.3333333 | 0.03757785 | FAM75D1           | RASEF             |
| chr9 | +(84676392..84676893) | 501  | 3.26016 | 23  | 12 | 11 | 0.0434783 | 3.1608E-05 | FAM75D1           | RASEF             |
| chr9 | +(84677064..84677619) | 555  | 0.93087 | 12  | 5  | 7  | 0.1666667 | 0.00224163 | FAM75D1           | RASEF             |
| chr9 | +(85597403..85597911) | 508  | 3.54521 | 11  | 6  | 5  | 0.0909091 | 0.00308495 | FAM75D1           | RASEF             |
| chr9 | +(86239064..86240388) | 1324 | 0.43546 | 15  | 9  | 6  | 0.2       | 0.99926864 | C9orf103          | UBQLN1            |
| chr9 | +(86452017..86452617) | 600  | 0.21815 | 18  | 12 | 6  | 0.3333333 | 0.96947765 | GKAP1             | KIF27             |

|      |                         |      |         |    |    |   |           |            |           |          |
|------|-------------------------|------|---------|----|----|---|-----------|------------|-----------|----------|
| chr9 | +(86466922..86467538)   | 616  | 1.65224 | 7  | 4  | 3 | 0.1428571 | 0.029      | GKAP1     | KIF27    |
| chr9 | +(87366767..87367422)   | 655  | 3.54521 | 14 | 6  | 8 | 0.1428571 | 0.01943355 | NTRK2     | AGTPBP1  |
| chr9 | +(87863472..87864054)   | 582  | 3.54521 | 6  | 4  | 2 | 0.3333333 | 0.067      | NTRK2     | AGTPBP1  |
| chr9 | +(88960409..88960914)   | 505  | 3.54521 | 7  | 4  | 3 | 0.1428571 | 0.029      | ISCA1     | ZCCHC6   |
| chr9 | +(90130432..90131543)   | 1111 | 1.65224 | 15 | 7  | 8 | 0.0666667 | 0.00059687 | DAPK1     | CTSL1    |
| chr9 | +(90219602..90220281)   | 679  | 0.43546 | 9  | 4  | 5 | 0.1111111 | 0.008      | DAPK1     | CTSL1    |
| chr9 | +(90245166..90246239)   | 1073 | 1.65224 | 13 | 8  | 5 | 0.2307692 | 0.0017074  | DAPK1     | CTSL1    |
| chr9 | +(95055635..95056280)   | 645  | 0.43546 | 14 | 7  | 7 | 0         | 0.08985625 | C9orf44   | IARS     |
| chr9 | +(95888329..95888928)   | 599  | 0.21815 | 10 | 5  | 5 | 0         | 0.00451172 | C9orf89   | NINJ1    |
| chr9 | +(95993754..95994317)   | 563  | 1.65224 | 9  | 5  | 4 | 0.1111111 | 0.548      | WNK2      | C9orf129 |
| chr9 | +(96407694..96408309)   | 615  | 0.21815 | 15 | 7  | 8 | 0.0666667 | 0.91754258 | PHF2      | MIR4291  |
| chr9 | +(96408721..96409243)   | 522  | 1.65224 | 7  | 3  | 4 | 0.1428571 | 0.029      | PHF2      | MIR4291  |
| chr9 | +(97203107..97203617)   | 510  | 3.54521 | 11 | 7  | 4 | 0.2727273 | 0.082      | HIATL1    | FBP2     |
| chr9 | +(97207155..97207691)   | 536  | 3.54521 | 8  | 5  | 3 | 0.25      | 0.018      | HIATL1    | FBP2     |
| chr9 | +(97882883..97883575)   | 692  | 3.54521 | 6  | 3  | 3 | 0         | 0.05       | MIR24-1   | FANCC    |
| chr9 | +(97992319..97993017)   | 698  | 0.43546 | 13 | 9  | 4 | 0.3846154 | 0.999      | MIR24-1   | FANCC    |
| chr9 | +(98161565..98162265)   | 700  | 0.21815 | 10 | 6  | 4 | 0.2       | 0.005      | FANCC     | PTCH1    |
| chr9 | +(99285584..99286095)   | 511  | 3.54521 | 11 | 6  | 5 | 0.0909091 | 0.57243393 | HABP4     | CDC14B   |
| chr9 | +(99606996..99607643)   | 647  | 3.54521 | 9  | 6  | 3 | 0.3333333 | 0.012      | ZNF510    | ZNF782   |
| chr9 | +(99961827..99962328)   | 501  | 3.54521 | 12 | 6  | 6 | 0         | 0.13116584 | LOC340508 | ZNF322B  |
| chr9 | +(100053367..100053904) | 537  | 3.54521 | 6  | 4  | 2 | 0.3333333 | 0.067      | LOC57653  | C9orf174 |
| chr9 | +(100833599..100834299) | 700  | 1.65224 | 12 | 5  | 7 | 0.1666667 | 0.99775837 | NANS      | TRIM14   |
| chr9 | +(100861948..100862536) | 588  | 0.93087 | 8  | 3  | 5 | 0.25      | 0.018      | NANS      | TRIM14   |
| chr9 | +(101055964..101056649) | 685  | 0.21815 | 11 | 6  | 5 | 0.0909091 | 0.03394459 | TBC1D2    | GABBR2   |
| chr9 | +(101533060..101533697) | 637  | 0.43546 | 9  | 4  | 5 | 0.1111111 | 0.008      | GABBR2    | ANKS6    |
| chr9 | +(101715580..101716278) | 698  | 0.21815 | 10 | 5  | 5 | 0         | 0.00451172 | COL15A1   | TGFBR1   |
| chr9 | +(101746539..101747239) | 700  | 0.93087 | 12 | 4  | 8 | 0.3333333 | 0.00328926 | COL15A1   | TGFBR1   |
| chr9 | +(101984469..101985247) | 778  | 0.21815 | 19 | 10 | 9 | 0.0526316 | 0.00011928 | ALG2      | SEC61B   |
| chr9 | +(107379512..107380030) | 518  | 1.65224 | 12 | 5  | 7 | 0.1666667 | 0.04407898 | OR13C2    | OR13C9   |
| chr9 | +(108123309..108123965) | 656  | 0.43546 | 11 | 6  | 5 | 0.0909091 | 0.00529357 | SLC44A1   | FSD1L    |
| chr9 | +(108286060..108286565) | 505  | 3.54521 | 15 | 9  | 6 | 0.2       | 0.88070358 | FSD1L     | FKTN     |
| chr9 | +(108520290..108520905) | 615  | 3.54521 | 6  | 3  | 3 | 0         | 0.05       | TMEM38B   | ZNF462   |
| chr9 | +(109686843..109687364) | 521  | 1.65224 | 9  | 5  | 4 | 0.1111111 | 0.032      | ZNF462    | MIR548Q  |
| chr9 | +(111950278..111950872) | 594  | 0.43546 | 9  | 5  | 4 | 0.1111111 | 0.008      | C9orf4    | EPB41L4B |

|      |                         |      |         |    |    |    |           |            |         |          |
|------|-------------------------|------|---------|----|----|----|-----------|------------|---------|----------|
| chr9 | +(112017656..112018177) | 521  | 3.54521 | 6  | 4  | 2  | 0.3333333 | 0.067      | C9orf4  | EPB41L4B |
| chr9 | +(113169423..113169958) | 535  | 1.65224 | 10 | 5  | 5  | 0         | 0.23235105 | TXNDC8  | SVEP1    |
| chr9 | +(113703783..113704482) | 699  | 0.93087 | 10 | 7  | 3  | 0.4       | 0.008      | MUSK    | LPAR1    |
| chr9 | +(114173078..114173768) | 690  | 3.54521 | 9  | 6  | 3  | 0.3333333 | 0.048      | OR2K2   | KIAA0368 |
| chr9 | +(114688999..114689669) | 670  | 3.54521 | 6  | 2  | 4  | 0.3333333 | 0.067      | UGCG    | MIR3134  |
| chr9 | +(115805744..115806653) | 909  | 0.93087 | 16 | 5  | 11 | 0.375     | 0.26661423 | ZNF883  | ZFP37    |
| chr9 | +(115811718..115812877) | 1159 | 3.54521 | 13 | 7  | 6  | 0.0769231 | 0.98393771 | ZNF883  | ZFP37    |
| chr9 | +(115983531..115984092) | 561  | 0.43546 | 14 | 8  | 6  | 0.1428571 | 0.00097289 | SLC31A2 | FKBP15   |
| chr9 | +(116696888..116697431) | 543  | 1.65224 | 7  | 3  | 4  | 0.1428571 | 0.029      | ZNF618  | AMBP     |
| chr9 | +(116811163..116811787) | 624  | 0.11433 | 11 | 6  | 5  | 0.0909091 | 0.00308495 | ZNF618  | AMBP     |
| chr9 | +(116924614..116925177) | 563  | 0.93087 | 9  | 3  | 6  | 0.3333333 | 0.131      | COL27A1 | MIR455   |
| chr9 | +(117094899..117095567) | 668  | 3.26016 | 32 | 15 | 17 | 0.0625    | 0.00047617 | ORM2    | AKNA     |
| chr9 | +(117129520..117130218) | 698  | 0.01435 | 14 | 6  | 8  | 0.1428571 | 0.00097289 | ORM2    | AKNA     |
| chr9 | +(117145464..117145977) | 513  | 1.65224 | 8  | 3  | 5  | 0.25      | 0.018      | ORM2    | AKNA     |
| chr9 | +(117797967..117798602) | 635  | 3.54521 | 10 | 4  | 6  | 0.2       | 0.129      | TNFSF8  | TNC      |
| chr9 | +(119858090..119858641) | 551  | 3.54521 | 7  | 3  | 4  | 0.1428571 | 0.029      | PAPPA   | ASTN2    |
| chr9 | +(120155042..120156422) | 1380 | 1.65224 | 13 | 7  | 6  | 0.0769231 | 0.9986501  | PAPPA   | ASTN2    |
| chr9 | +(123667522..123668613) | 1091 | 0.43546 | 18 | 11 | 7  | 0.2222222 | 0.0002444  | PHF19   | TRAF1    |
| chr9 | +(124343914..124344598) | 684  | 3.54521 | 10 | 6  | 4  | 0.2       | 0.995      | DAB2IP  | TTLL11   |
| chr9 | +(126132770..126133276) | 506  | 3.54521 | 6  | 3  | 3  | 0         | 0.05       | CRB2    | DENND1A  |
| chr9 | +(126142134..126142834) | 700  | 0.11433 | 11 | 6  | 5  | 0.0909091 | 0.00308495 | CRB2    | DENND1A  |
| chr9 | +(126199512..126200022) | 510  | 0.43546 | 9  | 5  | 4  | 0.1111111 | 0.008      | CRB2    | DENND1A  |
| chr9 | +(126346328..126346965) | 637  | 1.65224 | 7  | 3  | 4  | 0.1428571 | 0.029      | CRB2    | DENND1A  |
| chr9 | +(127224846..127225546) | 700  | 0.11433 | 11 | 5  | 6  | 0.0909091 | 0.00308495 | GPR144  | NR5A1    |
| chr9 | +(127617344..127618356) | 1012 | 0.06099 | 25 | 9  | 16 | 0.28      | 0.99610283 | WDR38   | RPL35    |
| chr9 | +(127683874..127684470) | 596  | 3.54521 | 9  | 6  | 3  | 0.3333333 | 0.012      | ARPC5L  | GOLGA1   |
| chr9 | +(127950254..127950954) | 700  | 0.11433 | 11 | 5  | 6  | 0.0909091 | 0.00308495 | SCAI    | PPP6C    |
| chr9 | +(127982310..127983009) | 699  | 0.93087 | 10 | 6  | 4  | 0.2       | 0.01       | RABEPK  | HSPA5    |
| chr9 | +(127998935..127999490) | 555  | 0.93087 | 12 | 5  | 7  | 0.1666667 | 0.34237168 | RABEPK  | HSPA5    |
| chr9 | +(128749560..128750080) | 520  | 3.54521 | 7  | 4  | 3  | 0.1428571 | 0.029      | PBX3    | FAM125B  |
| chr9 | +(128953715..128954620) | 905  | 0.11433 | 18 | 9  | 9  | 0         | 0.00017429 | PBX3    | FAM125B  |
| chr9 | +(129105104..129105777) | 673  | 0.43546 | 9  | 4  | 5  | 0.1111111 | 0.008      | FAM125B | LMX1B    |
| chr9 | +(129378743..129379289) | 546  | 3.54521 | 6  | 2  | 4  | 0.3333333 | 0.067      | LMX1B   | ZBTB43   |
| chr9 | +(129434606..129435306) | 700  | 0.21815 | 10 | 7  | 3  | 0.4       | 0.008      | LMX1B   | ZBTB43   |

|      |                         |      |         |    |    |    |           |            |            |              |
|------|-------------------------|------|---------|----|----|----|-----------|------------|------------|--------------|
| chr9 | +(129599896..129600431) | 535  | 1.65224 | 10 | 6  | 4  | 0.2       | 0.019      | ZBTB43     | ZBTB34       |
| chr9 | +(129648480..129649049) | 569  | 0.93087 | 8  | 5  | 3  | 0.25      | 0.018      | ZBTB34     | RALGPS1      |
| chr9 | +(129884002..129884625) | 623  | 1.65224 | 11 | 4  | 7  | 0.2727273 | 0.394      | RALGPS1    | ANGPTL2      |
| chr9 | +(129957130..129957830) | 700  | 0.21815 | 15 | 8  | 7  | 0.0666667 | 0.79105652 | ANGPTL2    | GARNL3       |
| chr9 | +(129971327..129972011) | 684  | 0.43546 | 11 | 7  | 4  | 0.2727273 | 0.536      | ANGPTL2    | GARNL3       |
| chr9 | +(130080662..130081249) | 587  | 0.93087 | 8  | 4  | 4  | 0         | 0.014      | GARNL3     | SLC2A8       |
| chr9 | +(130287033..130287733) | 700  | 0.93087 | 10 | 4  | 6  | 0.2       | 0.005      | LRSAM1     | FAM129B      |
| chr9 | +(130501528..130502038) | 510  | 3.54521 | 6  | 2  | 4  | 0.3333333 | 0.067      | TOR2A      | SH2D3C       |
| chr9 | +(130633777..130634461) | 684  | 0.43546 | 14 | 7  | 7  | 0         | 0.91014375 | ENG        | AK1          |
| chr9 | +(130649002..130649560) | 558  | 1.65224 | 11 | 7  | 4  | 0.2727273 | 0.115      | AK1        | ST6GALNAC6   |
| chr9 | +(130690867..130691516) | 649  | 0.06099 | 13 | 5  | 8  | 0.2307692 | 0.0394913  | ST6GALNAC4 | PIP5KL1      |
| chr9 | +(131004976..131005611) | 635  | 3.54521 | 6  | 3  | 3  | 0         | 0.05       | DNM1       | MIR199B      |
| chr9 | +(131019704..131020245) | 541  | 1.65224 | 7  | 3  | 4  | 0.1428571 | 0.029      | MIR3154    | GOLGA2       |
| chr9 | +(131035904..131036410) | 506  | 0.93087 | 12 | 4  | 8  | 0.3333333 | 0.00328926 | MIR3154    | GOLGA2       |
| chr9 | +(131570167..131570702) | 535  | 0.06099 | 13 | 8  | 5  | 0.2307692 | 0.0394913  | TBC1D13    | ENDOG        |
| chr9 | +(131582261..131582888) | 627  | 3.54521 | 6  | 2  | 4  | 0.3333333 | 0.067      | ENDOG      | C9orf114     |
| chr9 | +(131661007..131662055) | 1048 | 0.11433 | 21 | 14 | 7  | 0.3333333 | 0.00012828 | LRRC8A     | PHYHD1       |
| chr9 | +(131669764..131670356) | 592  | 1.65224 | 12 | 4  | 8  | 0.3333333 | 0.00328926 | LRRC8A     | PHYHD1       |
| chr9 | +(131719094..131719602) | 508  | 3.54521 | 6  | 3  | 3  | 0         | 0.05       | NUP188     | SH3GLB2      |
| chr9 | +(131798465..131799165) | 700  | 0.06099 | 12 | 5  | 7  | 0.1666667 | 0.00224163 | SH3GLB2    | FAM73B       |
| chr9 | +(131825121..131826233) | 1112 | 0.43546 | 18 | 11 | 7  | 0.2222222 | 0.99713007 | FAM73B     | DOLPP1       |
| chr9 | +(132184777..132185340) | 563  | 0.43546 | 9  | 5  | 4  | 0.1111111 | 0.008      | C9orf106   | C9orf50      |
| chr9 | +(132189785..132191109) | 1324 | 1.65224 | 15 | 7  | 8  | 0.0666667 | 0.00059687 | C9orf106   | C9orf50      |
| chr9 | +(132366418..132367118) | 700  | 1.65224 | 10 | 7  | 3  | 0.4       | 0.992      | C9orf106   | C9orf50      |
| chr9 | +(132376270..132376921) | 651  | 0.43546 | 9  | 4  | 5  | 0.1111111 | 0.008      | C9orf106   | C9orf50      |
| chr9 | +(132619840..132620540) | 700  | 0.02892 | 16 | 11 | 5  | 0.375     | 0.61149613 | USP20      | FNBP1        |
| chr9 | +(132905685..132906271) | 586  | 0.43546 | 9  | 5  | 4  | 0.1111111 | 0.008      | GPR107     | NCS1         |
| chr9 | +(132939372..132940544) | 1172 | 1.65224 | 15 | 8  | 7  | 0.0666667 | 0.99245637 | NCS1       | ASS1         |
| chr9 | +(133057559..133058942) | 1383 | 0.02892 | 26 | 9  | 17 | 0.3076923 | 1.869E-05  | NCS1       | ASS1         |
| chr9 | +(133226509..133227067) | 558  | 3.54521 | 6  | 4  | 2  | 0.3333333 | 0.067      | NCS1       | ASS1         |
| chr9 | +(133356658..133357358) | 700  | 0.43546 | 14 | 5  | 9  | 0.2857143 | 0.00981533 | ASS1       | LOC100272217 |
| chr9 | +(133730083..133730783) | 700  | 0.06099 | 13 | 4  | 9  | 0.3846154 | 0.001      | ABL1       | QRFP         |
| chr9 | +(133777648..133778476) | 828  | 0.00701 | 16 | 6  | 10 | 0.25      | 0.00056905 | QRFP       | FIBCD1       |
| chr9 | +(134019686..134020205) | 519  | 1.65224 | 8  | 3  | 5  | 0.25      | 0.018      | NUP214     | FAM78A       |

|      |                         |     |         |    |    |    |           |            |          |          |
|------|-------------------------|-----|---------|----|----|----|-----------|------------|----------|----------|
| chr9 | +(134039112..134039636) | 524 | 3.54521 | 8  | 3  | 5  | 0.25      | 0.018      | NUP214   | FAM78A   |
| chr9 | +(134396673..134397242) | 569 | 3.54521 | 10 | 6  | 4  | 0.2       | 0.033      | POMT1    | UCK1     |
| chr9 | +(134466988..134467526) | 538 | 3.54521 | 7  | 3  | 4  | 0.1428571 | 0.029      | UCK1     | RAPGEF1  |
| chr9 | +(134526139..134526769) | 630 | 3.54521 | 9  | 6  | 3  | 0.3333333 | 0.274      | UCK1     | RAPGEF1  |
| chr9 | +(134616163..134616746) | 583 | 0.06099 | 12 | 5  | 7  | 0.1666667 | 0.00224163 | RAPGEF1  | MED27    |
| chr9 | +(134620490..134621190) | 700 | 0.43546 | 9  | 6  | 3  | 0.3333333 | 0.012      | RAPGEF1  | MED27    |
| chr9 | +(135202697..135203209) | 512 | 1.65224 | 13 | 9  | 4  | 0.3846154 | 0.207      | NTNG2    | SETX     |
| chr9 | +(135276866..135277566) | 700 | 0.21815 | 18 | 11 | 7  | 0.2222222 | 0.14881787 | SETX     | TTF1     |
| chr9 | +(135733217..135733917) | 700 | 3.54521 | 9  | 3  | 6  | 0.3333333 | 0.988      | GTF3C4   | C9orf98  |
| chr9 | +(135772274..135772799) | 525 | 3.54521 | 9  | 3  | 6  | 0.3333333 | 0.083      | C9orf9   | TSC1     |
| chr9 | +(136279709..136280214) | 505 | 3.54521 | 8  | 4  | 4  | 0         | 0.014      | C9orf96  | REXO4    |
| chr9 | +(136405501..136406309) | 808 | 0.06099 | 18 | 7  | 11 | 0.2222222 | 0.17081484 | ADAMTSL2 | FAM163B  |
| chr9 | +(136410463..136410984) | 521 | 0.93087 | 8  | 5  | 3  | 0.25      | 0.018      | ADAMTSL2 | FAM163B  |
| chr9 | +(136482947..136483529) | 582 | 3.54521 | 7  | 3  | 4  | 0.1428571 | 0.029      | FAM163B  | DBH      |
| chr9 | +(136520614..136521283) | 669 | 0.11433 | 13 | 7  | 6  | 0.0769231 | 0.0013499  | DBH      | SARDH    |
| chr9 | +(136679045..136679687) | 642 | 0.93087 | 8  | 4  | 4  | 0         | 0.014      | SARDH    | VAV2     |
| chr9 | +(136733845..136734448) | 603 | 1.65224 | 7  | 3  | 4  | 0.1428571 | 0.029      | SARDH    | VAV2     |
| chr9 | +(136811177..136811685) | 508 | 0.43546 | 9  | 4  | 5  | 0.1111111 | 0.008      | SARDH    | VAV2     |
| chr9 | +(136813281..136813844) | 563 | 3.54521 | 10 | 6  | 4  | 0.2       | 0.005      | SARDH    | VAV2     |
| chr9 | +(136814086..136814647) | 561 | 1.65224 | 7  | 4  | 3  | 0.1428571 | 0.029      | SARDH    | VAV2     |
| chr9 | +(137414681..137415381) | 700 | 0.11433 | 11 | 4  | 7  | 0.2727273 | 0.003      | RXRA     | COL5A1   |
| chr9 | +(137433189..137433696) | 507 | 3.54521 | 6  | 2  | 4  | 0.3333333 | 0.067      | RXRA     | COL5A1   |
| chr9 | +(137453695..137454342) | 647 | 0.93087 | 8  | 3  | 5  | 0.25      | 0.018      | RXRA     | COL5A1   |
| chr9 | +(137490499..137491159) | 660 | 0.93087 | 8  | 3  | 5  | 0.25      | 0.018      | RXRA     | COL5A1   |
| chr9 | +(137586445..137587133) | 688 | 3.54521 | 6  | 4  | 2  | 0.3333333 | 0.067      | COL5A1   | MIR3689A |
| chr9 | +(137612582..137613111) | 529 | 0.93087 | 8  | 3  | 5  | 0.25      | 0.018      | COL5A1   | MIR3689A |
| chr9 | +(137673786..137674486) | 700 | 0.06099 | 13 | 9  | 4  | 0.3846154 | 0.02       | COL5A1   | MIR3689A |
| chr9 | +(137675006..137675583) | 577 | 3.54521 | 6  | 3  | 3  | 0         | 0.05       | COL5A1   | MIR3689A |
| chr9 | +(137681528..137682228) | 700 | 0.21815 | 10 | 4  | 6  | 0.2       | 0.005      | COL5A1   | MIR3689A |
| chr9 | +(137727791..137728491) | 700 | 3.54521 | 9  | 6  | 3  | 0.3333333 | 0.012      | COL5A1   | MIR3689A |
| chr9 | +(137735953..137736471) | 518 | 1.65224 | 10 | 7  | 3  | 0.4       | 0.008      | COL5A1   | MIR3689A |
| chr9 | +(138676980..138677680) | 700 | 1.65224 | 10 | 7  | 3  | 0.4       | 0.008      | KCNT1    | CAMSAP1  |
| chr9 | +(138714608..138715171) | 563 | 3.54521 | 9  | 6  | 3  | 0.3333333 | 0.012      | KCNT1    | CAMSAP1  |
| chr9 | +(138972851..138973541) | 690 | 0.43546 | 9  | 6  | 3  | 0.3333333 | 0.012      | UBAC1    | NACC2    |



|       |                         |      |         |    |    |    |           |            |            |        |
|-------|-------------------------|------|---------|----|----|----|-----------|------------|------------|--------|
| chr9  | +(139077431..139078081) | 650  | 0.02892 | 13 | 7  | 6  | 0.0769231 | 0.0013499  | C9orf69    | LHX3   |
| chr9  | +(139090402..139091639) | 1237 | 0.43546 | 18 | 11 | 7  | 0.2222222 | 0.01324732 | C9orf69    | LHX3   |
| chr9  | +(139292868..139293420) | 552  | 0.11433 | 12 | 6  | 6  | 0         | 0.00197388 | CARD9      | SNAPC4 |
| chr9  | +(139329160..139329860) | 700  | 1.65224 | 12 | 4  | 8  | 0.3333333 | 0.055      | PMPCA      | INPP5E |
| chr9  | +(139348704..139349462) | 758  | 0.93087 | 13 | 9  | 4  | 0.3846154 | 0.099      | INPP5E     | SEC16A |
| chr9  | +(139398999..139399579) | 580  | 3.54521 | 9  | 3  | 6  | 0.3333333 | 0.452      | C9orf163   | NOTCH1 |
| chr9  | +(139415693..139416714) | 1021 | 1.65224 | 14 | 7  | 7  | 0         | 0.99912744 | C9orf163   | NOTCH1 |
| chr9  | +(139442753..139443288) | 535  | 1.65224 | 9  | 5  | 4  | 0.1111111 | 0.548      | NOTCH1     | EGFL7  |
| chr9  | +(139557636..139558171) | 535  | 0.93087 | 14 | 5  | 9  | 0.2857143 | 0.00981533 | EGFL7      | MIR126 |
| chr9  | +(139752794..139753372) | 578  | 1.65224 | 9  | 6  | 3  | 0.3333333 | 0.274      | MAMDC4     | EDF1   |
| chr9  | +(139753482..139754693) | 1211 | 0.93087 | 16 | 9  | 7  | 0.125     | 0.99524777 | MAMDC4     | EDF1   |
| chr9  | +(139785016..139785576) | 560  | 0.43546 | 14 | 5  | 9  | 0.2857143 | 0.9986501  | TRAF2      | FBXW5  |
| chr9  | +(139944565..139945337) | 772  | 0.01871 | 52 | 32 | 20 | 0.2307692 | 0.73875166 | NPDC1      | ENTPD2 |
| chr9  | +(140052382..140052897) | 515  | 3.54521 | 9  | 3  | 6  | 0.3333333 | 0.917      | GRIN1      | LRRC26 |
| chr9  | +(140082284..140083147) | 863  | 3.54521 | 12 | 6  | 6  | 0         | 0.00197388 | MIR3621    | ANAPC2 |
| chr9  | +(140088050..140088750) | 700  | 0.11433 | 12 | 6  | 6  | 0         | 0.00197388 | SSNA1      | TPRN   |
| chr9  | +(140243003..140243996) | 993  | 0.21815 | 17 | 6  | 11 | 0.2941176 | 0.95623415 | NRARP      | EXD3   |
| chr9  | +(140277698..140278398) | 700  | 0.11433 | 13 | 4  | 9  | 0.3846154 | 0.074      | NRARP      | EXD3   |
| chr9  | +(140326107..140326802) | 695  | 1.65224 | 11 | 7  | 4  | 0.2727273 | 0.997      | NOXA1      | ENTPD8 |
| chr9  | +(140350574..140351145) | 571  | 3.54521 | 10 | 5  | 5  | 0         | 0.00451172 | ENTPD8     | NELF   |
| chr9  | +(140359198..140359898) | 700  | 0.11433 | 16 | 5  | 11 | 0.375     | 0.9990816  | NELF       | PNPLA7 |
| chr9  | +(140400433..140401782) | 1349 | 0.02892 | 22 | 12 | 10 | 0.0909091 | 0.74517426 | NELF       | PNPLA7 |
| chr9  | +(140687134..140687735) | 601  | 3.54521 | 6  | 4  | 2  | 0.3333333 | 0.067      | FLJ40292   | MIR602 |
| chr9  | +(140782916..140783765) | 849  | 0.21815 | 19 | 11 | 8  | 0.1578947 | 0.00662147 | CACNA1B    | TUBBP5 |
| chr9  | +(140798626..140799169) | 543  | 3.54521 | 6  | 4  | 2  | 0.3333333 | 0.067      | CACNA1B    | TUBBP5 |
| chr10 | +(267056..267570)       | 514  | 0.28001 | 16 | 9  | 7  | 0.125     | 0.00042755 | ZMYND11    | DIP2C  |
| chr10 | +(375242..375904)       | 662  | 0.55496 | 12 | 8  | 4  | 0.3333333 | 0.024      | ZMYND11    | DIP2C  |
| chr10 | +(410119..410933)       | 814  | 0.01727 | 15 | 5  | 10 | 0.3333333 | 0.00109982 | ZMYND11    | DIP2C  |
| chr10 | +(461494..462041)       | 547  | 2.7175  | 6  | 3  | 3  | 0         | 0.05       | ZMYND11    | DIP2C  |
| chr10 | +(931403..931920)       | 517  | 2.7175  | 6  | 4  | 2  | 0.3333333 | 0.067      | C10orf108  | LARP4B |
| chr10 | +(1043170..1043870)     | 700  | 2.7175  | 9  | 6  | 3  | 0.3333333 | 0.988      | GTPBP4     | IDI2   |
| chr10 | +(1284428..1285100)     | 672  | 0.55496 | 8  | 4  | 4  | 0         | 0.014      | NCRNA00200 | ADARB2 |
| chr10 | +(1787554..1788714)     | 1160 | 0.55496 | 14 | 6  | 8  | 0.1428571 | 0.00097289 | NCRNA00168 | PFKP   |
| chr10 | +(1994537..1995237)     | 700  | 0.28001 | 9  | 6  | 3  | 0.3333333 | 0.012      | NCRNA00168 | PFKP   |

|       |                       |      |         |    |    |    |           |            |             |             |   |
|-------|-----------------------|------|---------|----|----|----|-----------|------------|-------------|-------------|---|
| chr10 | +(2714518..2715433)   | 915  | 0.55496 | 15 | 6  | 9  | 0.2       | 0.00666417 | NCRNA00168  | PFKP        |   |
| chr10 | +(2723903..2724537)   | 634  | 1.23598 | 7  | 3  | 4  | 0.1428571 | 0.029      | NCRNA00168  | PFKP        |   |
| chr10 | +(3166680..3167380)   | 700  | 2.7175  | 13 | 9  | 4  | 0.3846154 | 0.207      | PFKP        | PITRM1      |   |
| chr10 | +(5144453..5144970)   | 517  | 2.7175  | 13 | 8  | 5  | 0.2307692 | 0.01405402 | AKR1C3      | AKR1CL1     |   |
| chr10 | +(5734301..5734998)   | 697  | 1.23598 | 7  | 4  | 3  | 0.1428571 | 0.029      | C10orf18    | GDI2        |   |
| chr10 | +(6065858..6066469)   | 611  | 2.7175  | 9  | 3  | 6  | 0.3333333 | 0.048      | IL15RA      | IL2RA       |   |
| chr10 | +(6067748..6068283)   | 535  | 1.23598 | 8  | 5  | 3  | 0.25      | 0.018      | IL15RA      | IL2RA       |   |
| chr10 | +(6142947..6143787)   | 840  | 0.01727 | 13 | 7  | 6  | 0.0769231 | 0.0013499  | RBM17       | PFKFB3      |   |
| chr10 | +(6184883..6185583)   | 700  | 0.05992 | 11 | 4  | 7  | 0.2727273 | 0.003      | RBM17       | PFKFB3      |   |
| chr10 | +(6263758..6264458)   | 700  | 0.02989 | 12 | 6  | 6  | 0         | 0.00197388 | MIR3155     | PRKCQ       |   |
| chr10 | +(6267866..6268440)   | 574  | 2.7175  | 11 | 5  | 6  | 0.0909091 | 0.99691505 | MIR3155     | PRKCQ       |   |
| chr10 | +(6472129..6473099)   | 970  | 0.28001 | 15 | 6  | 9  | 0.2       | 0.00073136 | MIR3155     | PRKCQ       |   |
| chr10 | +(6885094..6886014)   | 920  | 2.7175  | 12 | 6  | 6  | 0         | 0.00197388 | LOC439949   | SFMBT2      |   |
| chr10 | +(7409447..7410098)   | 651  | 2.7175  | 6  | 4  | 2  | 0.3333333 | 0.067      | LOC439949   | SFMBT2      |   |
| chr10 | +(11312450..11313037) | 587  | 2.7175  | 9  | 4  | 5  | 0.1111111 | 0.008      | CELF2       | USP6NL      |   |
| chr10 | +(12864431..12865069) | 638  | 2.7175  | 9  | 6  | 3  | 0.3333333 | 0.548      | CAMK1D      | LOC283070   |   |
| chr10 | +(13782472..13782988) | 516  | 2.7175  | 10 | 6  | 4  | 0.2       | 0.005      | PRPF18      | FRMD4A      |   |
| chr10 | +(14952148..14952676) | 528  | 0.55496 | 13 | 8  | 5  | 0.2307692 | 0.9982926  | SUV39H2     | DCLRE1C     |   |
| chr10 | +(14977268..14977783) | 515  | 2.7175  | 6  | 2  | 4  | 0.3333333 | 0.067      | SUV39H2     | DCLRE1C     |   |
| chr10 | +(14981416..14982075) | 659  | 1.23598 | 10 | 3  | 7  | 0.4       | 0.008      | SUV39H2     | DCLRE1C     |   |
| chr10 | +(16940676..16941206) | 530  | 0.55496 | 8  | 4  | 4  | 0         | 0.014      | RSU1        | CUBN        |   |
| chr10 | +(17483699..17484399) | 700  | 2.7175  | 9  | 3  | 6  | 0.3333333 | 0.012      | VIM         | ST8SIA6     |   |
| chr10 | +(18064847..18065411) | 564  | 0.05992 | 22 | 7  | 15 | 0.3636364 | 0.00040653 | FAM23A_dup2 | MRC1L1_dup2 |   |
| chr10 | +(18284377..18284892) | 515  | 2.7175  | 7  | 3  | 4  | 0.1428571 | 0.029      | SLC39A12    | CACNB2      |   |
| chr10 | +(18927895..18928594) | 699  | 2.7175  | 10 | 6  | 4  | 0.2       | 0.995      | CACNB2      | NSUN6       |   |
| chr10 | +(20453414..20454057) | 643  | 1.23598 | 7  | 3  | 4  | 0.1428571 | 0.029      | PLXDC2      | NEBL        | v |
| chr10 | +(20592488..20593412) | 924  | 0.02989 | 20 | 12 | 8  | 0.2       | 0.00010641 | PLXDC2      | NEBL        | v |
| chr10 | +(21157418..21157926) | 508  | 2.7175  | 10 | 7  | 3  | 0.4       | 0.008      | PLXDC2      | NEBL        | v |
| chr10 | +(23730573..23731099) | 526  | 0.55496 | 17 | 6  | 11 | 0.2941176 | 0.01040023 | OTUD1       | KIAA1217    |   |
| chr10 | +(24490642..24491263) | 621  | 0.55496 | 8  | 5  | 3  | 0.25      | 0.018      | KIAA1217    | PRINS       |   |
| chr10 | +(24834527..24835068) | 541  | 2.7175  | 9  | 5  | 4  | 0.1111111 | 0.452      | MIR603      | ARHGAP21    |   |
| chr10 | +(25786012..25787217) | 1205 | 0.02989 | 22 | 10 | 12 | 0.0909091 | 0.99996194 | GPR158      | MYO3A       |   |
| chr10 | +(27318013..27318547) | 534  | 1.23598 | 10 | 6  | 4  | 0.2       | 0.005      | NCRNA00202  | ANKRD26     |   |
| chr10 | +(27324002..27324699) | 697  | 0.02989 | 15 | 8  | 7  | 0.0666667 | 0.00131091 | NCRNA00202  | ANKRD26     |   |

|       |                       |     |         |    |    |    |           |            |              |            |
|-------|-----------------------|-----|---------|----|----|----|-----------|------------|--------------|------------|
| chr10 | +(27535451..27535993) | 542 | 1.23598 | 10 | 4  | 6  | 0.2       | 0.129      | ACBD5        | LOC387646  |
| chr10 | +(27627557..27628061) | 504 | 2.7175  | 8  | 5  | 3  | 0.25      | 0.018      | LOC387646    | PTCHD3     |
| chr10 | +(27815338..27815959) | 621 | 0.55496 | 10 | 6  | 4  | 0.2       | 0.005      | RAB18        | MKX        |
| chr10 | +(27897761..27898379) | 618 | 2.7175  | 6  | 3  | 3  | 0         | 0.05       | RAB18        | MKX        |
| chr10 | +(29769177..29769783) | 606 | 0.55496 | 13 | 4  | 9  | 0.3846154 | 0.038      | LOC387647    | SVIL       |
| chr10 | +(32983489..32983994) | 505 | 2.7175  | 11 | 4  | 7  | 0.2727273 | 0.055      | C10orf68     | ITGB1      |
| chr10 | +(33198973..33199617) | 644 | 1.23598 | 7  | 3  | 4  | 0.1428571 | 0.029      | C10orf68     | ITGB1      |
| chr10 | +(33541224..33541727) | 503 | 2.7175  | 6  | 3  | 3  | 0         | 0.05       | ITGB1        | NRP1       |
| chr10 | +(34206700..34207400) | 700 | 0.12128 | 10 | 4  | 6  | 0.2       | 0.005      | NRP1         | PARD3      |
| chr10 | +(36811978..36812610) | 632 | 0.28001 | 19 | 9  | 10 | 0.0526316 | 0.3415457  | FZD8         | ANKRD30A   |
| chr10 | +(37440787..37441290) | 503 | 2.7175  | 10 | 7  | 3  | 0.4       | 0.033      | ANKRD30A     | MTRNR2L7   |
| chr10 | +(37469943..37470764) | 821 | 0.01241 | 68 | 37 | 31 | 0.0882353 | 0.0013572  | ANKRD30A     | MTRNR2L7   |
| chr10 | +(37474282..37474837) | 555 | 1.86846 | 54 | 21 | 33 | 0.2222222 | 0.00259801 | ANKRD30A     | MTRNR2L7   |
| chr10 | +(37478218..37478892) | 674 | 0.10713 | 27 | 16 | 11 | 0.1851852 | 1.0989E-05 | ANKRD30A     | MTRNR2L7   |
| chr10 | +(37488249..37488754) | 505 | 2.7175  | 11 | 5  | 6  | 0.0909091 | 0.13666084 | ANKRD30A     | MTRNR2L7   |
| chr10 | +(37506590..37507274) | 684 | 1.23598 | 15 | 7  | 8  | 0.0666667 | 0.99940313 | ANKRD30A     | MTRNR2L7   |
| chr10 | +(37868895..37869432) | 537 | 0.55496 | 12 | 8  | 4  | 0.3333333 | 0.107      | ANKRD30A     | MTRNR2L7   |
| chr10 | +(38049009..38049518) | 509 | 1.23598 | 7  | 4  | 3  | 0.1428571 | 0.029      | MTRNR2L7     | ZNF248     |
| chr10 | +(38120426..38120950) | 524 | 2.7175  | 9  | 5  | 4  | 0.1111111 | 0.365      | MTRNR2L7     | ZNF248     |
| chr10 | +(38241374..38241890) | 516 | 2.7175  | 10 | 6  | 4  | 0.2       | 0.305      | ZNF248       | ZNF25      |
| chr10 | +(38598782..38599318) | 536 | 1.23598 | 10 | 5  | 5  | 0         | 0.00451172 | LOC100129055 | HSD17B7P2  |
| chr10 | +(38654086..38654648) | 562 | 1.23598 | 12 | 5  | 7  | 0.1666667 | 0.11161257 | HSD17B7P2    | SEPT7L     |
| chr10 | +(43087923..43088487) | 564 | 0.28001 | 15 | 9  | 6  | 0.2       | 0.06275324 | ZNF37BP      | ZNF33B     |
| chr10 | +(43604295..43604995) | 700 | 0.28001 | 9  | 3  | 6  | 0.3333333 | 0.012      | RET          | CSGALNACT2 |
| chr10 | +(43691917..43692481) | 564 | 2.7175  | 10 | 6  | 4  | 0.2       | 0.995      | CSGALNACT2   | RASGEF1A   |
| chr10 | +(43808479..43809474) | 995 | 0.02989 | 18 | 12 | 6  | 0.3333333 | 0.00037352 | RASGEF1A     | FXVD4      |
| chr10 | +(44922455..44923151) | 696 | 0.28001 | 9  | 5  | 4  | 0.1111111 | 0.008      | CXCL12       | LOC220980  |
| chr10 | +(45324528..45325228) | 700 | 0.12128 | 10 | 3  | 7  | 0.4       | 0.008      | CXCL12       | LOC220980  |
| chr10 | +(46212992..46213518) | 526 | 1.23598 | 20 | 7  | 13 | 0.3       | 0.00015575 | ANUBL1       | FAM21C     |
| chr10 | +(46238676..46239179) | 503 | 2.7175  | 6  | 2  | 4  | 0.3333333 | 0.067      | FAM21C       | AGAP4      |
| chr10 | +(46247689..46248365) | 676 | 0.00584 | 28 | 13 | 15 | 0.0714286 | 5.9919E-05 | FAM21C       | AGAP4      |
| chr10 | +(46969248..46969948) | 700 | 0.12128 | 13 | 6  | 7  | 0.0769231 | 0.33411757 | FAM35B       | SYT15      |
| chr10 | +(47400395..47400939) | 544 | 0.28088 | 44 | 21 | 23 | 0.0454545 | 0.00100131 | FAM35B2      | ANTXR1     |
| chr10 | +(47901435..47901939) | 504 | 1.23598 | 12 | 7  | 5  | 0.1666667 | 0.14557611 | FAM21B_dup1  | CTSLL2     |

|       |                       |      |         |    |    |    |           |            |               |              |   |
|-------|-----------------------|------|---------|----|----|----|-----------|------------|---------------|--------------|---|
| chr10 | +(47919758..47920261) | 503  | 2.7175  | 10 | 3  | 7  | 0.4       | 0.033      | FAM21B_dup1   | CTSLL2       |   |
| chr10 | +(47943454..47943967) | 513  | 0.55496 | 17 | 9  | 8  | 0.0588235 | 0.00468738 | FAM21B_dup1   | CTSLL2       |   |
| chr10 | +(48007119..48007657) | 538  | 0.55496 | 12 | 8  | 4  | 0.3333333 | 0.008      | FAM21B_dup1   | CTSLL2       |   |
| chr10 | +(48262716..48263588) | 872  | 0.10152 | 39 | 17 | 22 | 0.1282051 | 3.3468E-06 | ANXA8L1_dup2  | ZNF488       |   |
| chr10 | +(48329358..48329993) | 635  | 2.7175  | 6  | 3  | 3  | 0         | 0.05       | ANXA8L1_dup2  | ZNF488       |   |
| chr10 | +(48370062..48370589) | 527  | 2.7175  | 6  | 2  | 4  | 0.3333333 | 0.067      | ZNF488        | RBP3         |   |
| chr10 | +(48390014..48390709) | 695  | 0.28001 | 10 | 7  | 3  | 0.4       | 0.058      | ZNF488        | RBP3         |   |
| chr10 | +(48771197..48771848) | 651  | 1.23598 | 10 | 7  | 3  | 0.4       | 0.017      | GDF10         | PTPN20A_dup2 |   |
| chr10 | +(49465288..49465823) | 535  | 1.23598 | 7  | 4  | 3  | 0.1428571 | 0.029      | FRMPD2P1_dup2 | FRMPD2       |   |
| chr10 | +(49712172..49713339) | 1167 | 0.02989 | 19 | 7  | 12 | 0.2631579 | 0.00561494 | MAPK8         | ARHGAP22     |   |
| chr10 | +(50038544..50039051) | 507  | 2.7175  | 6  | 2  | 4  | 0.3333333 | 0.067      | WDFY4         | LRRC18       |   |
| chr10 | +(50966283..50966784) | 501  | 2.7175  | 8  | 4  | 4  | 0         | 0.014      | C10orf53      | OGDHL        |   |
| chr10 | +(51073139..51073644) | 505  | 2.7175  | 9  | 5  | 4  | 0.1111111 | 0.008      | OGDHL         | PARG         | v |
| chr10 | +(51191760..51192262) | 502  | 2.7175  | 12 | 5  | 7  | 0.1666667 | 0.02117853 | OGDHL         | PARG         | v |
| chr10 | +(51225616..51226193) | 577  | 2.7175  | 14 | 8  | 6  | 0.1428571 | 0.03535058 | OGDHL         | PARG         | v |
| chr10 | +(51291175..51291679) | 504  | 2.7175  | 9  | 6  | 3  | 0.3333333 | 0.048      | OGDHL         | PARG         | v |
| chr10 | +(51464723..51465767) | 1044 | 1.23598 | 33 | 20 | 13 | 0.2121212 | 0.02542629 | LOC728407     | AGAP7        |   |
| chr10 | +(51821389..51821893) | 504  | 2.7175  | 9  | 6  | 3  | 0.3333333 | 0.048      | AGAP6         | FAM21A       |   |
| chr10 | +(51822480..51822992) | 512  | 2.7175  | 10 | 6  | 4  | 0.2       | 0.238      | AGAP6         | FAM21A       |   |
| chr10 | +(51844813..51845315) | 502  | 2.7175  | 19 | 13 | 6  | 0.3684211 | 0.02183558 | FAM21B_dup2   | ASAH2        |   |
| chr10 | +(51851574..51852274) | 700  | 0.01767 | 38 | 17 | 21 | 0.1052632 | 1.8555E-05 | FAM21B_dup2   | ASAH2        |   |
| chr10 | +(51852556..51853205) | 649  | 0.8428  | 35 | 14 | 21 | 0.2       | 0.21933228 | FAM21B_dup2   | ASAH2        |   |
| chr10 | +(51853287..51853850) | 563  | 0.8428  | 24 | 9  | 15 | 0.25      | 0.01084662 | FAM21B_dup2   | ASAH2        |   |
| chr10 | +(51859658..51860305) | 647  | 0.11559 | 44 | 21 | 23 | 0.0454545 | 3.0462E-06 | FAM21B_dup2   | ASAH2        |   |
| chr10 | +(51873277..51873786) | 509  | 0.55496 | 19 | 11 | 8  | 0.1578947 | 0.01038818 | FAM21B_dup2   | ASAH2        |   |
| chr10 | +(51877259..51877865) | 606  | 1.13649 | 20 | 7  | 13 | 0.3       | 0.06114457 | FAM21B_dup2   | ASAH2        |   |
| chr10 | +(51885824..51886386) | 562  | 2.7175  | 10 | 6  | 4  | 0.2       | 0.543      | FAM21B_dup2   | ASAH2        |   |
| chr10 | +(51887034..51887850) | 816  | 2.7175  | 18 | 10 | 8  | 0.1111111 | 0.00821967 | FAM21B_dup2   | ASAH2        |   |
| chr10 | +(51889295..51889907) | 612  | 1.23598 | 13 | 5  | 8  | 0.2307692 | 0.15275354 | FAM21B_dup2   | ASAH2        |   |
| chr10 | +(51890225..51890747) | 522  | 0.55496 | 12 | 4  | 8  | 0.3333333 | 0.596      | FAM21B_dup2   | ASAH2        |   |
| chr10 | +(51994297..51994798) | 501  | 2.7175  | 18 | 6  | 12 | 0.3333333 | 0.01561431 | FAM21B_dup2   | ASAH2        |   |
| chr10 | +(52025913..52026430) | 517  | 2.7175  | 11 | 4  | 7  | 0.2727273 | 0.036      | ASAH2         | SGMS1        |   |
| chr10 | +(55353361..55354004) | 643  | 1.23598 | 10 | 5  | 5  | 0         | 0.69924593 | MBL2          | PCDH15       |   |
| chr10 | +(55568999..55569558) | 559  | 1.23598 | 11 | 7  | 4  | 0.2727273 | 0.264      | MBL2          | PCDH15       |   |

|       |                       |      |         |    |    |   |           |            |            |           |   |
|-------|-----------------------|------|---------|----|----|---|-----------|------------|------------|-----------|---|
| chr10 | +(55581555..55582080) | 525  | 2.7175  | 9  | 3  | 6 | 0.3333333 | 0.131      | MBL2       | PCDH15    |   |
| chr10 | +(60549246..60549881) | 635  | 2.7175  | 7  | 3  | 4 | 0.1428571 | 0.2        | LOC728640  | PHYHIPL   |   |
| chr10 | +(61566538..61567047) | 509  | 2.7175  | 7  | 3  | 4 | 0.1428571 | 0.029      | SLC16A9    | CCDC6     | v |
| chr10 | +(61946343..61946954) | 611  | 2.7175  | 6  | 3  | 3 | 0         | 0.05       | C10orf40   | ANK3      |   |
| chr10 | +(62148917..62149419) | 502  | 2.7175  | 9  | 3  | 6 | 0.3333333 | 0.131      | C10orf40   | ANK3      |   |
| chr10 | +(64573586..64574150) | 564  | 2.7175  | 10 | 5  | 5 | 0         | 0.03790009 | ADO        | EGR2      |   |
| chr10 | +(67889036..67889656) | 620  | 2.7175  | 8  | 3  | 5 | 0.25      | 0.018      | ANXA2P3    | CTNNA3    | v |
| chr10 | +(69594106..69594615) | 509  | 2.7175  | 6  | 4  | 2 | 0.3333333 | 0.067      | LRRTM3     | DNAJC12   |   |
| chr10 | +(70391878..70392400) | 522  | 1.23598 | 12 | 5  | 7 | 0.1666667 | 0.04407898 | TET1       | CCAR1     |   |
| chr10 | +(70404274..70405151) | 877  | 0.55496 | 17 | 8  | 9 | 0.0588235 | 0.02165407 | TET1       | CCAR1     |   |
| chr10 | +(70694394..70694895) | 501  | 2.7175  | 8  | 4  | 4 | 0         | 0.014      | DDX50      | DDX21     | v |
| chr10 | +(70742243..70742910) | 667  | 0.28001 | 13 | 8  | 5 | 0.2307692 | 0.0017074  | DDX21      | KIAA1279  | v |
| chr10 | +(71630779..71631467) | 688  | 2.7175  | 6  | 4  | 2 | 0.3333333 | 0.067      | COL13A1    | H2AFY2    |   |
| chr10 | +(71879618..71880584) | 966  | 1.23598 | 14 | 6  | 8 | 0.1428571 | 0.00149246 | H2AFY2     | AIFM2     |   |
| chr10 | +(73295466..73296048) | 582  | 0.02989 | 12 | 5  | 7 | 0.1666667 | 0.00224163 | CDH23      | C10orf105 |   |
| chr10 | +(73446429..73446961) | 532  | 2.7175  | 6  | 3  | 3 | 0         | 0.05       | CDH23      | C10orf105 |   |
| chr10 | +(73495572..73496153) | 581  | 0.05992 | 11 | 7  | 4 | 0.2727273 | 0.003      | CDH23      | C10orf105 |   |
| chr10 | +(73537407..73537947) | 540  | 0.05992 | 12 | 7  | 5 | 0.1666667 | 0.02117853 | C10orf54   | PSAP      |   |
| chr10 | +(73569522..73570190) | 668  | 2.7175  | 8  | 5  | 3 | 0.25      | 0.714      | C10orf54   | PSAP      |   |
| chr10 | +(73759010..73759695) | 685  | 2.7175  | 6  | 3  | 3 | 0         | 0.05       | CHST3      | SPOCK2    |   |
| chr10 | +(73871295..73871925) | 630  | 0.55496 | 8  | 5  | 3 | 0.25      | 0.018      | SPOCK2     | ASCC1     |   |
| chr10 | +(74096312..74096927) | 615  | 0.12128 | 11 | 6  | 5 | 0.0909091 | 0.00308495 | DDIT4      | DNAJB12   |   |
| chr10 | +(74635196..74635896) | 700  | 0.00815 | 14 | 5  | 9 | 0.2857143 | 0.0013499  | CCDC109A   | OIT3      |   |
| chr10 | +(75394087..75394598) | 511  | 1.23598 | 8  | 5  | 3 | 0.25      | 0.018      | USP54      | MYOZ1     |   |
| chr10 | +(75404647..75405166) | 519  | 1.23598 | 9  | 4  | 5 | 0.1111111 | 0.008      | MYOZ1      | SYNPO2L   |   |
| chr10 | +(75435168..75435746) | 578  | 0.02989 | 23 | 16 | 7 | 0.3913043 | 0.82521259 | SYNPO2L    | AGAP5     |   |
| chr10 | +(75597180..75597880) | 700  | 0.28001 | 10 | 3  | 7 | 0.4       | 0.058      | NDST2      | CAMK2G    |   |
| chr10 | +(75873564..75874264) | 700  | 0.55496 | 9  | 3  | 6 | 0.3333333 | 0.012      | VCL        | AP3M1     |   |
| chr10 | +(76804139..76805263) | 1124 | 0.05992 | 19 | 11 | 8 | 0.1578947 | 0.99986003 | MYST4      | DUPD1     |   |
| chr10 | +(76867488..76868188) | 700  | 0.28001 | 13 | 5  | 8 | 0.2307692 | 0.0017074  | DUPD1      | DUSP13    |   |
| chr10 | +(77163938..77164546) | 608  | 2.7175  | 6  | 3  | 3 | 0         | 0.05       | NCRNA00245 | C10orf11  |   |
| chr10 | +(77213998..77214601) | 603  | 0.55496 | 8  | 3  | 5 | 0.25      | 0.018      | NCRNA00245 | C10orf11  |   |
| chr10 | +(77295384..77295898) | 514  | 2.7175  | 6  | 4  | 2 | 0.3333333 | 0.067      | NCRNA00245 | C10orf11  |   |
| chr10 | +(77671358..77671918) | 560  | 0.55496 | 8  | 3  | 5 | 0.25      | 0.018      | C10orf11   | KCNMA1    |   |

|       |                       |      |         |    |    |    |           |            |               |              |
|-------|-----------------------|------|---------|----|----|----|-----------|------------|---------------|--------------|
| chr10 | +(79168062..79168762) | 700  | 2.7175  | 8  | 4  | 4  | 0         | 0.014      | C10orf11      | KCNMA1       |
| chr10 | +(79493207..79493775) | 568  | 0.55496 | 10 | 6  | 4  | 0.2       | 0.129      | KCNMA1        | DLG5         |
| chr10 | +(79809679..79810416) | 737  | 0.00815 | 15 | 9  | 6  | 0.2       | 0.00073136 | RPS24         | LOC283050    |
| chr10 | +(79813108..79813808) | 700  | 0.05992 | 13 | 5  | 8  | 0.2307692 | 0.07161746 | RPS24         | LOC283050    |
| chr10 | +(79915848..79916548) | 700  | 1.23598 | 12 | 5  | 7  | 0.1666667 | 0.00224163 | RPS24         | LOC283050    |
| chr10 | +(80146442..80146951) | 509  | 1.23598 | 7  | 4  | 3  | 0.1428571 | 0.029      | RPS24         | LOC283050    |
| chr10 | +(80376945..80377621) | 676  | 1.23598 | 7  | 4  | 3  | 0.1428571 | 0.029      | RPS24         | LOC283050    |
| chr10 | +(80564505..80565205) | 700  | 0.12128 | 14 | 6  | 8  | 0.1428571 | 0.15084979 | RPS24         | LOC283050    |
| chr10 | +(80722260..80722835) | 575  | 0.55496 | 8  | 5  | 3  | 0.25      | 0.018      | RPS24         | LOC283050    |
| chr10 | +(80806708..80807408) | 700  | 0.05992 | 11 | 7  | 4  | 0.2727273 | 0.003      | RPS24         | LOC283050    |
| chr10 | +(81023045..81024034) | 989  | 0.28001 | 18 | 10 | 8  | 0.1111111 | 0.97950364 | ZMIZ1         | PPIF         |
| chr10 | +(81056219..81056747) | 528  | 1.23598 | 10 | 4  | 6  | 0.2       | 0.005      | ZMIZ1         | PPIF         |
| chr10 | +(81371887..81372454) | 567  | 0.01727 | 16 | 11 | 5  | 0.375     | 0.00134045 | SFTPA1        | LOC650623    |
| chr10 | +(82033792..82034655) | 863  | 0.00815 | 16 | 10 | 6  | 0.25      | 0.06444254 | ANXA11        | MAT1A        |
| chr10 | +(82185264..82185820) | 556  | 0.28001 | 10 | 5  | 5  | 0         | 0.00451172 | C10orf58      | TSPAN14      |
| chr10 | +(82202475..82203022) | 547  | 0.55496 | 8  | 3  | 5  | 0.25      | 0.018      | C10orf58      | TSPAN14      |
| chr10 | +(82265454..82266075) | 621  | 0.12128 | 16 | 10 | 6  | 0.25      | 0.00056905 | TSPAN14       | SH2D4B       |
| chr10 | +(85954635..85955236) | 601  | 2.7175  | 6  | 3  | 3  | 0         | 0.05       | CDHR1         | LRIT2        |
| chr10 | +(86147103..86147799) | 696  | 1.23598 | 7  | 3  | 4  | 0.1428571 | 0.029      | FAM190B       | GRID1        |
| chr10 | +(87546358..87546912) | 554  | 0.05992 | 11 | 5  | 6  | 0.0909091 | 0.00308495 | FAM190B       | GRID1        |
| chr10 | +(87978034..87979167) | 1133 | 0.12128 | 17 | 10 | 7  | 0.1764706 | 0.00031815 | FAM190B       | GRID1        |
| chr10 | +(88075869..88076569) | 700  | 0.02989 | 15 | 8  | 7  | 0.0666667 | 0.20894348 | FAM190B       | GRID1        |
| chr10 | +(88113719..88114957) | 1238 | 0.12128 | 20 | 10 | 10 | 0         | 0.7751541  | FAM190B       | GRID1        |
| chr10 | +(88452100..88453305) | 1205 | 0.12128 | 16 | 8  | 8  | 0         | 0.00038877 | LDB3          | BMPR1A       |
| chr10 | +(88768391..88769088) | 697  | 0.11137 | 38 | 18 | 20 | 0.0526316 | 4.5185E-07 | AGAP11        | FAM25A       |
| chr10 | +(88820178..88820714) | 536  | 2.7175  | 10 | 3  | 7  | 0.4       | 0.258      | FAM25A        | GLUD1        |
| chr10 | +(88930426..88931092) | 666  | 0.11559 | 35 | 23 | 12 | 0.3142857 | 0.01428384 | FAM35A        | FAM22A       |
| chr10 | +(89621937..89622130) | 193  | 0.00269 | 59 | 29 | 30 | 0.0169492 | 0.95525929 | CFLP1 (16568) | KILLIN       |
| chr10 | +(89622245..89622385) | 141  | 0.19754 | 13 | 5  | 8  | 0.2307692 | 0.02851994 | CFLP1 (16724) | KILLIN       |
| chr10 | +(90966030..90966547) | 517  | 2.7175  | 9  | 3  | 6  | 0.3333333 | 0.274      | FAS-AS1       | CH25H        |
| chr10 | +(91532322..91532878) | 556  | 1.23598 | 10 | 5  | 5  | 0         | 0.00451172 | KIF20B        | HTR7         |
| chr10 | +(93311909..93313054) | 1145 | 1.23598 | 14 | 7  | 7  | 0         | 0.01267366 | PCGF5         | LOC100188947 |
| chr10 | +(93878497..93879197) | 700  | 1.23598 | 14 | 8  | 6  | 0.1428571 | 0.15084979 | BTAF1         | CPEB3        |
| chr10 | +(94773832..94774539) | 707  | 2.7175  | 13 | 9  | 4  | 0.3846154 | 0.001      | EXOC6         | CYP26C1      |

|       |                         |      |         |    |    |    |           |            |          |          |   |
|-------|-------------------------|------|---------|----|----|----|-----------|------------|----------|----------|---|
| chr10 | +(94824983..94825588)   | 605  | 0.55496 | 8  | 5  | 3  | 0.25      | 0.018      | CYP26C1  | CYP26A1  |   |
| chr10 | +(95136919..95137487)   | 568  | 1.23598 | 8  | 5  | 3  | 0.25      | 0.018      | CYP26A1  | MYOF     |   |
| chr10 | +(98823384..98824006)   | 622  | 1.23598 | 12 | 8  | 4  | 0.3333333 | 0.715      | C10orf12 | SLIT1    |   |
| chr10 | +(98825227..98825775)   | 548  | 0.28001 | 9  | 4  | 5  | 0.1111111 | 0.008      | C10orf12 | SLIT1    |   |
| chr10 | +(98848157..98849101)   | 944  | 0.28001 | 18 | 8  | 10 | 0.1111111 | 0.03778029 | C10orf12 | SLIT1    |   |
| chr10 | +(99656291..99656923)   | 632  | 1.23598 | 10 | 3  | 7  | 0.4       | 0.092      | GOLGA7B  | CRTAC1   |   |
| chr10 | +(99734025..99734545)   | 520  | 1.23598 | 7  | 3  | 4  | 0.1428571 | 0.029      | GOLGA7B  | CRTAC1   |   |
| chr10 | +(99738118..99738818)   | 700  | 0.55496 | 13 | 5  | 8  | 0.2307692 | 0.9982926  | GOLGA7B  | CRTAC1   |   |
| chr10 | +(99857901..99858601)   | 700  | 1.23598 | 10 | 7  | 3  | 0.4       | 0.008      | CRTAC1   | C10orf28 |   |
| chr10 | +(101639622..101640152) | 530  | 2.7175  | 9  | 6  | 3  | 0.3333333 | 0.083      | ABCC2    | DNMBP    |   |
| chr10 | +(102576852..102577552) | 700  | 0.12128 | 10 | 4  | 6  | 0.2       | 0.005      | PAX2     | FAM178A  | v |
| chr10 | +(102766169..102766869) | 700  | 0.55496 | 13 | 6  | 7  | 0.0769231 | 0.5        | LZTS2    | PDZD7    |   |
| chr10 | +(103600926..103601465) | 539  | 0.12128 | 10 | 6  | 4  | 0.2       | 0.005      | MGEA5    | KCNIP2   | v |
| chr10 | +(103825952..103826652) | 700  | 0.05992 | 11 | 7  | 4  | 0.2727273 | 0.003      | HPS6     | LDB1     |   |
| chr10 | +(103828606..103829124) | 518  | 2.7175  | 6  | 4  | 2  | 0.3333333 | 0.067      | HPS6     | LDB1     |   |
| chr10 | +(103899076..103899584) | 508  | 1.23598 | 10 | 6  | 4  | 0.2       | 0.129      | PPRC1    | NOLC1    |   |
| chr10 | +(104241313..104241881) | 568  | 2.7175  | 6  | 3  | 3  | 0         | 0.05       | TMEM180  | ACTR1A   |   |
| chr10 | +(104687050..104687581) | 531  | 2.7175  | 6  | 2  | 4  | 0.3333333 | 0.067      | CNNM2    | NT5C2    |   |
| chr10 | +(104811146..104811761) | 615  | 0.55496 | 8  | 4  | 4  | 0         | 0.014      | CNNM2    | NT5C2    |   |
| chr10 | +(105151770..105152302) | 532  | 0.05992 | 13 | 5  | 8  | 0.2307692 | 0.00420773 | TAF5     | USMG5    |   |
| chr10 | +(105177267..105177816) | 549  | 0.21264 | 17 | 11 | 6  | 0.2941176 | 0.00045556 | PDCD11   | CALHM2   |   |
| chr10 | +(105232052..105232637) | 585  | 0.55496 | 8  | 5  | 3  | 0.25      | 0.018      | CALHM1   | CALHM3   |   |
| chr10 | +(105266860..105267456) | 596  | 2.7175  | 9  | 3  | 6  | 0.3333333 | 0.012      | NEURL    | SH3PXD2A |   |
| chr10 | +(105333695..105334220) | 525  | 0.28001 | 9  | 4  | 5  | 0.1111111 | 0.008      | NEURL    | SH3PXD2A |   |
| chr10 | +(105437778..105438879) | 1101 | 0.12128 | 19 | 10 | 9  | 0.0526316 | 0.99988072 | NEURL    | SH3PXD2A |   |
| chr10 | +(105457538..105458101) | 563  | 0.55496 | 8  | 3  | 5  | 0.25      | 0.018      | NEURL    | SH3PXD2A |   |
| chr10 | +(105793175..105793847) | 672  | 0.00815 | 14 | 6  | 8  | 0.1428571 | 0.00097289 | SLK      | COL17A1  |   |
| chr10 | +(105883179..105884280) | 1101 | 1.23598 | 14 | 8  | 6  | 0.1428571 | 0.93933236 | C10orf78 | C10orf79 | v |
| chr10 | +(106057056..106057682) | 626  | 2.7175  | 11 | 5  | 6  | 0.0909091 | 0.00881105 | GSTO2    | ITPRIP   |   |
| chr10 | +(106410361..106411058) | 697  | 0.55496 | 13 | 8  | 5  | 0.2307692 | 0.0017074  | SORCS3   | SORCS1   |   |
| chr10 | +(116012368..116012921) | 553  | 0.55496 | 8  | 3  | 5  | 0.25      | 0.018      | VWA2     | AFAP1L2  |   |
| chr10 | +(118620341..118620910) | 569  | 1.23598 | 11 | 5  | 6  | 0.0909091 | 0.07206352 | HSPA12A  | KIAA1598 |   |
| chr10 | +(118682941..118683641) | 700  | 2.7175  | 9  | 6  | 3  | 0.3333333 | 0.988      | HSPA12A  | KIAA1598 |   |
| chr10 | +(118689241..118689745) | 504  | 2.7175  | 9  | 6  | 3  | 0.3333333 | 0.024      | HSPA12A  | KIAA1598 |   |

|       |                         |      |         |    |    |    |           |            |          |           |   |
|-------|-------------------------|------|---------|----|----|----|-----------|------------|----------|-----------|---|
| chr10 | +(118701995..118702562) | 567  | 0.28001 | 9  | 4  | 5  | 0.1111111 | 0.008      | HSPA12A  | KIAA1598  |   |
| chr10 | +(119026064..119026744) | 680  | 1.23598 | 10 | 3  | 7  | 0.4       | 0.058      | SLC18A2  | PDZD8     |   |
| chr10 | +(119262816..119263443) | 627  | 0.28001 | 9  | 5  | 4  | 0.1111111 | 0.008      | PDZD8    | EMX2OS    |   |
| chr10 | +(121011674..121012374) | 700  | 0.28001 | 9  | 6  | 3  | 0.3333333 | 0.012      | GRK5     | RGS10     |   |
| chr10 | +(121159139..121160057) | 918  | 0.55496 | 14 | 8  | 6  | 0.1428571 | 0.00097289 | GRK5     | RGS10     |   |
| chr10 | +(121202432..121203598) | 1166 | 0.12128 | 18 | 11 | 7  | 0.2222222 | 0.9997556  | GRK5     | RGS10     |   |
| chr10 | +(121372127..121372826) | 699  | 0.28001 | 14 | 9  | 5  | 0.2857143 | 0.9986501  | TIAL1    | BAG3      |   |
| chr10 | +(121418842..121420039) | 1197 | 0.00031 | 27 | 15 | 12 | 0.1111111 | 5.6273E-06 | BAG3     | INPP5F    |   |
| chr10 | +(121427288..121427895) | 607  | 0.55496 | 8  | 4  | 4  | 0         | 0.014      | BAG3     | INPP5F    |   |
| chr10 | +(121713877..121714934) | 1057 | 1.23598 | 13 | 6  | 7  | 0.0769231 | 0.9986501  | SEC23IP  | PPAPDC1A  |   |
| chr10 | +(122274594..122275294) | 700  | 0.28001 | 9  | 4  | 5  | 0.1111111 | 0.008      | PPAPDC1A | LOC283089 |   |
| chr10 | +(122318142..122319230) | 1088 | 0.28001 | 16 | 6  | 10 | 0.25      | 0.99538163 | PPAPDC1A | LOC283089 |   |
| chr10 | +(124234991..124235691) | 700  | 0.12128 | 10 | 4  | 6  | 0.2       | 0.005      | HTRA1    | DMBT1     |   |
| chr10 | +(124349314..124350303) | 989  | 1.23598 | 23 | 10 | 13 | 0.1304348 | 0.33210008 | DMBT1    | C10orf120 |   |
| chr10 | +(124352826..124353361) | 535  | 4.60097 | 37 | 17 | 20 | 0.0810811 | 6.5604E-06 | DMBT1    | C10orf120 |   |
| chr10 | +(124353368..124354870) | 1502 | 0.01727 | 69 | 35 | 34 | 0.0144928 | 0.06993232 | DMBT1    | C10orf120 |   |
| chr10 | +(124355796..124356313) | 517  | 1.23598 | 10 | 3  | 7  | 0.4       | 0.008      | DMBT1    | C10orf120 |   |
| chr10 | +(124359337..124359897) | 560  | 2.02194 | 22 | 12 | 10 | 0.0909091 | 0.00077534 | DMBT1    | C10orf120 |   |
| chr10 | +(124360402..124360969) | 567  | 1.23598 | 8  | 5  | 3  | 0.25      | 0.071      | DMBT1    | C10orf120 |   |
| chr10 | +(124376418..124376919) | 501  | 3.10812 | 20 | 8  | 12 | 0.2       | 0.00025847 | DMBT1    | C10orf120 |   |
| chr10 | +(124377606..124378276) | 670  | 0.01727 | 16 | 10 | 6  | 0.25      | 0.13903784 | DMBT1    | C10orf120 |   |
| chr10 | +(124379727..124380342) | 615  | 0.55496 | 8  | 3  | 5  | 0.25      | 0.018      | DMBT1    | C10orf120 |   |
| chr10 | +(124799927..124800471) | 544  | 2.7175  | 9  | 6  | 3  | 0.3333333 | 0.083      | ACADSB   | HMX3      |   |
| chr10 | +(124895839..124897049) | 1210 | 0.02989 | 18 | 7  | 11 | 0.2222222 | 0.6243719  | HMX3     | HMX2      |   |
| chr10 | +(125259079..125259790) | 711  | 0.00815 | 14 | 7  | 7  | 0         | 0.00087256 | BUB3     | GPR26     |   |
| chr10 | +(125329247..125329838) | 591  | 1.23598 | 7  | 4  | 3  | 0.1428571 | 0.029      | BUB3     | GPR26     |   |
| chr10 | +(125426180..125426710) | 530  | 2.7175  | 9  | 6  | 3  | 0.3333333 | 0.012      | GPR26    | CPXM2     |   |
| chr10 | +(125551124..125551683) | 559  | 0.55496 | 8  | 5  | 3  | 0.25      | 0.018      | GPR26    | CPXM2     |   |
| chr10 | +(125758230..125758930) | 700  | 0.05992 | 13 | 8  | 5  | 0.2307692 | 0.0017074  | CPXM2    | CHST15    |   |
| chr10 | +(126153326..126153891) | 565  | 0.55496 | 8  | 4  | 4  | 0         | 0.014      | LHPP     | FAM53B    | v |
| chr10 | +(126257309..126257880) | 571  | 0.55496 | 8  | 5  | 3  | 0.25      | 0.018      | LHPP     | FAM53B    | v |
| chr10 | +(126349865..126350565) | 700  | 0.28001 | 12 | 4  | 8  | 0.3333333 | 0.00328926 | LHPP     | FAM53B    | v |
| chr10 | +(126357402..126357948) | 546  | 2.7175  | 6  | 4  | 2  | 0.3333333 | 0.067      | LHPP     | FAM53B    | v |
| chr10 | +(126727047..126727679) | 632  | 0.05992 | 12 | 4  | 8  | 0.3333333 | 0.107      | ZRANB1   | CTBP2     |   |



|       |                         |      |         |    |    |    |           |            |         |         |
|-------|-------------------------|------|---------|----|----|----|-----------|------------|---------|---------|
| chr10 | +(126779517..126780079) | 562  | 1.23598 | 10 | 3  | 7  | 0.4       | 0.992      | ZRANB1  | CTBP2   |
| chr10 | +(129869384..129870081) | 697  | 2.7175  | 10 | 6  | 4  | 0.2       | 0.995      | PTPRE   | MKI67   |
| chr10 | +(129900737..129901322) | 585  | 1.23598 | 8  | 5  | 3  | 0.25      | 0.036      | PTPRE   | MKI67   |
| chr10 | +(129903437..129904082) | 645  | 0.00137 | 34 | 20 | 14 | 0.1764706 | 0.04009062 | PTPRE   | MKI67   |
| chr10 | +(129904261..129905131) | 870  | 0.05992 | 28 | 12 | 16 | 0.1428571 | 0.00172393 | PTPRE   | MKI67   |
| chr10 | +(129905885..129906818) | 933  | 1.23598 | 31 | 15 | 16 | 0.0322581 | 0.11783996 | PTPRE   | MKI67   |
| chr10 | +(129907409..129907931) | 522  | 0.55496 | 12 | 8  | 4  | 0.3333333 | 0.77       | PTPRE   | MKI67   |
| chr10 | +(130668930..130669630) | 700  | 0.28001 | 9  | 3  | 6  | 0.3333333 | 0.012      | MKI67   | MGMT    |
| chr10 | +(130696485..130697076) | 591  | 1.23598 | 7  | 4  | 3  | 0.1428571 | 0.029      | MKI67   | MGMT    |
| chr10 | +(130855868..130856568) | 700  | 1.23598 | 10 | 3  | 7  | 0.4       | 0.008      | MKI67   | MGMT    |
| chr10 | +(131314487..131314994) | 507  | 2.7175  | 6  | 4  | 2  | 0.3333333 | 0.067      | MGMT    | EBF3    |
| chr10 | +(131391409..131391943) | 534  | 0.00815 | 14 | 5  | 9  | 0.2857143 | 0.0013499  | MGMT    | EBF3    |
| chr10 | +(131529391..131529979) | 588  | 1.23598 | 7  | 3  | 4  | 0.1428571 | 0.029      | MGMT    | EBF3    |
| chr10 | +(131564929..131565629) | 700  | 1.23598 | 10 | 3  | 7  | 0.4       | 0.008      | MGMT    | EBF3    |
| chr10 | +(131723276..131723780) | 504  | 1.23598 | 8  | 5  | 3  | 0.25      | 0.018      | MGMT    | EBF3    |
| chr10 | +(132976074..132976679) | 605  | 0.55496 | 8  | 5  | 3  | 0.25      | 0.018      | MIR378C | TCERG1L |
| chr10 | +(133068882..133069582) | 700  | 0.05992 | 12 | 5  | 7  | 0.1666667 | 0.00224163 | MIR378C | TCERG1L |
| chr10 | +(133208700..133209248) | 548  | 1.23598 | 7  | 4  | 3  | 0.1428571 | 0.029      | TCERG1L | PPP2R2D |
| chr10 | +(133331739..133332293) | 554  | 0.55496 | 8  | 3  | 5  | 0.25      | 0.018      | TCERG1L | PPP2R2D |
| chr10 | +(133470688..133471193) | 505  | 1.23598 | 7  | 3  | 4  | 0.1428571 | 0.029      | TCERG1L | PPP2R2D |
| chr10 | +(133557813..133558500) | 687  | 0.28001 | 9  | 6  | 3  | 0.3333333 | 0.012      | TCERG1L | PPP2R2D |
| chr10 | +(133857630..133858727) | 1097 | 1.23598 | 14 | 7  | 7  | 0         | 0.00087256 | BNIP3   | JAKMIP3 |
| chr10 | +(133934418..133934927) | 509  | 1.23598 | 7  | 4  | 3  | 0.1428571 | 0.029      | JAKMIP3 | DPYSL4  |
| chr10 | +(134058101..134058801) | 700  | 0.12128 | 10 | 7  | 3  | 0.4       | 0.008      | DPYSL4  | STK32C  |
| chr10 | +(134445319..134445947) | 628  | 1.23598 | 10 | 3  | 7  | 0.4       | 0.992      | INPP5A  | NKX6-2  |
| chr10 | +(134463593..134464119) | 526  | 2.7175  | 6  | 4  | 2  | 0.3333333 | 0.067      | INPP5A  | NKX6-2  |
| chr10 | +(134514977..134515677) | 700  | 0.00584 | 21 | 13 | 8  | 0.2380952 | 0.82676768 | INPP5A  | NKX6-2  |
| chr10 | +(134516368..134517068) | 700  | 0.00584 | 15 | 9  | 6  | 0.2       | 0.00073136 | INPP5A  | NKX6-2  |
| chr10 | +(134567998..134568990) | 992  | 0.05992 | 19 | 9  | 10 | 0.0526316 | 0.00011928 | INPP5A  | NKX6-2  |
| chr10 | +(135034921..135035621) | 700  | 1.23598 | 11 | 7  | 4  | 0.2727273 | 0.997      | KNDC1   | UTF1    |
| chr10 | +(135037955..135038461) | 506  | 2.7175  | 6  | 3  | 3  | 0         | 0.05       | KNDC1   | UTF1    |
| chr10 | +(135120305..135121005) | 700  | 0.02989 | 12 | 5  | 7  | 0.1666667 | 0.00224163 | ADAM8   | TUBGCP2 |
| chr10 | +(135439019..135440319) | 1300 | 0.28088 | 83 | 41 | 42 | 0.0120482 | 0.004974   | SPRNP1  | FRG2B   |
| chr11 | +(452924..453716)       | 792  | 0.0294  | 12 | 7  | 5  | 0.1666667 | 0.00224163 | PTDSS2  | RNH1    |

|       |                     |      |         |     |     |     |           |            |           |              |
|-------|---------------------|------|---------|-----|-----|-----|-----------|------------|-----------|--------------|
| chr11 | +(594273..594966)   | 693  | 2.99724 | 9   | 6   | 3   | 0.3333333 | 0.012      | PHRF1     | IRF7         |
| chr11 | +(595778..596477)   | 699  | 1.40219 | 11  | 7   | 4   | 0.2727273 | 0.997      | PHRF1     | IRF7         |
| chr11 | +(615505..616558)   | 1053 | 1.40219 | 13  | 6   | 7   | 0.0769231 | 0.9986501  | PHRF1     | IRF7         |
| chr11 | +(621372..621896)   | 524  | 2.99724 | 6   | 3   | 3   | 0         | 0.05       | IRF7      | CDHR5        |
| chr11 | +(641379..642175)   | 796  | 0.66276 | 14  | 6   | 8   | 0.1428571 | 0.00097289 | DRD4      | DEAF1        |
| chr11 | +(665590..666259)   | 669  | 2.99724 | 6   | 4   | 2   | 0.3333333 | 0.067      | DRD4      | DEAF1        |
| chr11 | +(771406..772075)   | 669  | 0.66276 | 9   | 4   | 5   | 0.1111111 | 0.008      | TALDO1    | PDDC1        |
| chr11 | +(974510..975210)   | 700  | 2.99724 | 9   | 3   | 6   | 0.3333333 | 0.988      | AP2A2     | MUC6         |
| chr11 | +(997079..997779)   | 700  | 0.14182 | 10  | 3   | 7   | 0.4       | 0.008      | AP2A2     | MUC6         |
| chr11 | +(1016212..1018981) | 2769 | 0.00223 | 571 | 272 | 299 | 0.0472855 | 0.11356778 | AP2A2     | MUC6         |
| chr11 | +(1074389..1074917) | 528  | 0.66276 | 8   | 5   | 3   | 0.25      | 0.018      | MUC6      | MUC2         |
| chr11 | +(1092692..1093196) | 504  | 4.29974 | 77  | 48  | 29  | 0.2467532 | 0.00531486 | MUC2      | MUC5B        |
| chr11 | +(1102406..1102926) | 520  | 0.66276 | 8   | 4   | 4   | 0         | 0.014      | MUC2      | MUC5B        |
| chr11 | +(1122872..1123572) | 700  | 0.08468 | 11  | 5   | 6   | 0.0909091 | 0.00308495 | MUC2      | MUC5B        |
| chr11 | +(1154230..1154804) | 574  | 0.66276 | 8   | 4   | 4   | 0         | 0.014      | MUC2      | MUC5B        |
| chr11 | +(1263693..1264271) | 578  | 0.14182 | 15  | 8   | 7   | 0.0666667 | 0.02457042 | MUC5B     | TOLLIP       |
| chr11 | +(1264405..1264975) | 570  | 0.31019 | 12  | 5   | 7   | 0.1666667 | 0.08373231 | MUC5B     | TOLLIP       |
| chr11 | +(1266535..1267036) | 501  | 2.99724 | 14  | 9   | 5   | 0.2857143 | 0.27425312 | MUC5B     | TOLLIP       |
| chr11 | +(1269065..1269739) | 674  | 0.03757 | 44  | 17  | 27  | 0.2272727 | 0.00478329 | MUC5B     | TOLLIP       |
| chr11 | +(1269867..1270380) | 513  | 0.48299 | 34  | 15  | 19  | 0.1176471 | 0.02122725 | MUC5B     | TOLLIP       |
| chr11 | +(1271729..1272283) | 554  | 3.49895 | 29  | 12  | 17  | 0.1724138 | 0.14395042 | MUC5B     | TOLLIP       |
| chr11 | +(1331389..1332089) | 700  | 1.40219 | 11  | 7   | 4   | 0.2727273 | 0.997      | LOC255512 | BRSK2        |
| chr11 | +(1369791..1370412) | 621  | 2.99724 | 6   | 3   | 3   | 0         | 0.05       | LOC255512 | BRSK2        |
| chr11 | +(1382593..1383260) | 667  | 2.99724 | 6   | 2   | 4   | 0.3333333 | 0.067      | LOC255512 | BRSK2        |
| chr11 | +(1470279..1470844) | 565  | 0.31019 | 9   | 5   | 4   | 0.1111111 | 0.008      | BRSK2     | MOB2         |
| chr11 | +(1605454..1606034) | 580  | 0.31019 | 15  | 10  | 5   | 0.3333333 | 0.02502177 | BRSK2     | MOB2         |
| chr11 | +(1717999..1718992) | 993  | 0.07918 | 40  | 16  | 24  | 0.2       | 0.05465999 | BRSK2     | MOB2         |
| chr11 | +(1903104..1903804) | 700  | 0.08468 | 14  | 7   | 7   | 0         | 0.00087256 | MIR4298   | TNNT3        |
| chr11 | +(1951003..1951682) | 679  | 0.08468 | 24  | 11  | 13  | 0.0833333 | 0.88252402 | TNNT3     | MRPL23       |
| chr11 | +(1969231..1969931) | 700  | 0.08468 | 12  | 5   | 7   | 0.1666667 | 0.04407898 | MRPL23    | LOC100133545 |
| chr11 | +(1974858..1975397) | 539  | 1.40219 | 9   | 5   | 4   | 0.1111111 | 0.365      | MRPL23    | LOC100133545 |
| chr11 | +(2157978..2158482) | 504  | 2.99724 | 9   | 6   | 3   | 0.3333333 | 0.988      | MIR675    | INS-IGF2     |
| chr11 | +(2327316..2328003) | 687  | 0.14182 | 11  | 7   | 4   | 0.2727273 | 0.006      | TSPAN32   | CD81         |
| chr11 | +(2424644..2425291) | 647  | 1.40219 | 7   | 3   | 4   | 0.1428571 | 0.029      | TSSC4     | TRPM5        |

|       |                       |      |         |    |    |    |           |            |           |                |   |
|-------|-----------------------|------|---------|----|----|----|-----------|------------|-----------|----------------|---|
| chr11 | +(2468308..2468812)   | 504  | 2.99724 | 9  | 3  | 6  | 0.3333333 | 0.012      | KCNQ1     | KCNQ1OT1       |   |
| chr11 | +(2932786..2933397)   | 611  | 0.66276 | 8  | 5  | 3  | 0.25      | 0.018      | SLC22A18  | PHLDA2         |   |
| chr11 | +(3024727..3025341)   | 614  | 0.14182 | 10 | 6  | 4  | 0.2       | 0.005      | SNORA54   | CARS           |   |
| chr11 | +(3028681..3029413)   | 732  | 0.14182 | 23 | 8  | 15 | 0.3043478 | 0.0983528  | SNORA54   | CARS           |   |
| chr11 | +(3425787..3426460)   | 673  | 0.0294  | 12 | 4  | 8  | 0.3333333 | 0.00328926 | LOC650368 | TRPC2          |   |
| chr11 | +(4411439..4411942)   | 503  | 2.99724 | 7  | 4  | 3  | 0.1428571 | 0.314      | OR52B4    | TRIM21         |   |
| chr11 | +(4510462..4510971)   | 509  | 2.99724 | 11 | 5  | 6  | 0.0909091 | 0.35750033 | OR52K1    | OR52M1         |   |
| chr11 | +(4615580..4616187)   | 607  | 1.40219 | 12 | 5  | 7  | 0.1666667 | 0.18587565 | OR52I1    | TRIM68         |   |
| chr11 | +(4870009..4870552)   | 543  | 2.99724 | 10 | 5  | 5  | 0         | 0.69924593 | OR51F2    | OR51S1         |   |
| chr11 | +(6220709..6221296)   | 587  | 1.40219 | 10 | 7  | 3  | 0.4       | 0.033      | OR52W1    | C11orf42       |   |
| chr11 | +(7544032..7544688)   | 656  | 0.31019 | 12 | 5  | 7  | 0.1666667 | 0.00224163 | PPFIBP2   | CYB5R2         |   |
| chr11 | +(7596883..7597538)   | 655  | 2.99724 | 6  | 4  | 2  | 0.3333333 | 0.067      | PPFIBP2   | CYB5R2         |   |
| chr11 | +(8017131..8017831)   | 700  | 0.66276 | 9  | 3  | 6  | 0.3333333 | 0.012      | EIF3F     | TUB            |   |
| chr11 | +(8111019..8111643)   | 624  | 0.66276 | 8  | 4  | 4  | 0         | 0.014      | TUB       | RIC3           |   |
| chr11 | +(8350195..8350895)   | 700  | 0.66276 | 8  | 4  | 4  | 0         | 0.014      | LMO1      | STK33          |   |
| chr11 | +(8389062..8389762)   | 700  | 2.99724 | 9  | 3  | 6  | 0.3333333 | 0.012      | LMO1      | STK33          |   |
| chr11 | +(8495973..8496670)   | 697  | 0.31019 | 10 | 6  | 4  | 0.2       | 0.005      | LMO1      | STK33          |   |
| chr11 | +(8751188..8751710)   | 522  | 1.40219 | 10 | 7  | 3  | 0.4       | 0.008      | SNORA45   | ST5            |   |
| chr11 | +(9607868..9608518)   | 650  | 1.40219 | 12 | 5  | 7  | 0.1666667 | 0.18587565 | WEE1      | SWAP70         | v |
| chr11 | +(10645306..10645980) | 674  | 1.40219 | 8  | 5  | 3  | 0.25      | 0.018      | LYVE1     | MRVI1          |   |
| chr11 | +(10668904..10670133) | 1229 | 0.08468 | 19 | 8  | 11 | 0.1578947 | 0.99986003 | LYVE1     | MRVI1          |   |
| chr11 | +(10762082..10762782) | 700  | 0.14182 | 12 | 7  | 5  | 0.1666667 | 0.00224163 | MRVI1     | CTR9           |   |
| chr11 | +(10818858..10819409) | 551  | 1.40219 | 11 | 4  | 7  | 0.2727273 | 0.464      | CTR9      | EIF4G2         |   |
| chr11 | +(11924577..11925159) | 582  | 0.66276 | 12 | 4  | 8  | 0.3333333 | 0.00328926 | USP47     | DKK3           |   |
| chr11 | +(12009767..12010467) | 700  | 0.00341 | 16 | 10 | 6  | 0.25      | 0.01502979 | USP47     | DKK3           |   |
| chr11 | +(14308509..14309206) | 697  | 2.99724 | 10 | 6  | 4  | 0.2       | 0.995      | SPON1     | RRAS2          |   |
| chr11 | +(14852121..14852659) | 538  | 1.40219 | 11 | 4  | 7  | 0.2727273 | 0.003      | PDE3B     | CYP2R1         |   |
| chr11 | +(16071108..16071610) | 502  | 1.40219 | 9  | 4  | 5  | 0.1111111 | 0.016      | INSC      | SOX6           |   |
| chr11 | +(17112481..17113413) | 932  | 0.08468 | 17 | 9  | 8  | 0.0588235 | 0.00352682 | RPS13     | PIK3C2A        |   |
| chr11 | +(17171773..17172520) | 747  | 0.66276 | 12 | 6  | 6  | 0         | 0.00815459 | RPS13     | PIK3C2A        |   |
| chr11 | +(17298568..17299268) | 700  | 0.31019 | 13 | 9  | 4  | 0.3846154 | 0.999      | NUCB2     | DKFZp686O24166 |   |
| chr11 | +(18104843..18105344) | 501  | 2.99724 | 8  | 5  | 3  | 0.25      | 0.018      | TPH1      | SAAL1          |   |
| chr11 | +(27389284..27389984) | 700  | 2.99724 | 11 | 5  | 6  | 0.0909091 | 0.29194121 | CCDC34    | LGR4           |   |
| chr11 | +(31814644..31815234) | 590  | 2.99724 | 10 | 4  | 6  | 0.2       | 0.005      | ELP4      | PAX6           | v |

|       |                       |      |         |    |    |    |           |            |            |            |   |
|-------|-----------------------|------|---------|----|----|----|-----------|------------|------------|------------|---|
| chr11 | +(33090326..33090855) | 529  | 0.14182 | 13 | 4  | 9  | 0.3846154 | 0.001      | TCP11L1    | NCRNA00294 |   |
| chr11 | +(33111933..33112497) | 564  | 1.40219 | 12 | 6  | 6  | 0         | 0.02733197 | NCRNA00294 | CSTF3      |   |
| chr11 | +(34172652..34173835) | 1183 | 0.14182 | 26 | 17 | 9  | 0.3076923 | 1.869E-05  | NAT10      | ABTB2      | v |
| chr11 | +(34510472..34511143) | 671  | 0.14182 | 10 | 6  | 4  | 0.2       | 0.005      | CAT        | ELF5       |   |
| chr11 | +(35685002..35685515) | 513  | 2.99724 | 8  | 5  | 3  | 0.25      | 0.5        | TRIM44     | LDLRAD3    |   |
| chr11 | +(36598476..36599036) | 560  | 2.99724 | 8  | 5  | 3  | 0.25      | 0.196      | RAG1       | RAG2       |   |
| chr11 | +(45680634..45681691) | 1057 | 0.0294  | 18 | 7  | 11 | 0.2222222 | 0.99362333 | SYT13      | CHST1      |   |
| chr11 | +(45948023..45948558) | 535  | 2.99724 | 9  | 4  | 5  | 0.1111111 | 0.452      | GYLTL1B    | PHF21A     | v |
| chr11 | +(46000940..46001952) | 1012 | 0.31019 | 23 | 10 | 13 | 0.1304348 | 0.86785582 | GYLTL1B    | PHF21A     | v |
| chr11 | +(46275359..46276059) | 700  | 0.31019 | 13 | 4  | 9  | 0.3846154 | 0.001      | PHF21A     | CREB3L1    | v |
| chr11 | +(46740507..46741207) | 700  | 1.40219 | 10 | 3  | 7  | 0.4       | 0.992      | ZNF408     | F2         |   |
| chr11 | +(47306415..47307114) | 699  | 2.99724 | 11 | 6  | 5  | 0.0909091 | 0.00308495 | MADD       | MYBPC3     |   |
| chr11 | +(47354121..47354772) | 651  | 0.31019 | 10 | 6  | 4  | 0.2       | 0.129      | MADD       | MYBPC3     |   |
| chr11 | +(47414170..47414870) | 700  | 0.00341 | 15 | 8  | 7  | 0.0666667 | 0.00059687 | SPI1       | SLC39A13   |   |
| chr11 | +(47431483..47432183) | 700  | 0.01969 | 13 | 8  | 5  | 0.2307692 | 0.0017074  | SLC39A13   | PSMC3      |   |
| chr11 | +(47506958..47507625) | 667  | 1.40219 | 7  | 3  | 4  | 0.1428571 | 0.029      | RAPSN      | CELF1      |   |
| chr11 | +(47772385..47773085) | 700  | 0.14182 | 11 | 7  | 4  | 0.2727273 | 0.003      | AGBL2      | FNBP4      |   |
| chr11 | +(47774287..47774877) | 590  | 2.99724 | 10 | 5  | 5  | 0         | 0.02360089 | AGBL2      | FNBP4      |   |
| chr11 | +(48119535..48120223) | 688  | 2.99724 | 8  | 3  | 5  | 0.25      | 0.393      | PTPRJ      | OR4B1      |   |
| chr11 | +(49000173..49000683) | 510  | 0.66276 | 12 | 5  | 7  | 0.1666667 | 0.01417552 | OR4A47     | FOLH1      |   |
| chr11 | +(49010681..49011187) | 506  | 2.67895 | 34 | 22 | 12 | 0.2941176 | 1.4553E-05 | OR4A47     | FOLH1      |   |
| chr11 | +(49056437..49056939) | 502  | 2.15276 | 18 | 12 | 6  | 0.3333333 | 0.00099831 | OR4A47     | FOLH1      |   |
| chr11 | +(49190590..49191287) | 697  | 0.31019 | 13 | 9  | 4  | 0.3846154 | 0.003      | OR4A47     | FOLH1      |   |
| chr11 | +(55032050..55033104) | 1054 | 0.00341 | 35 | 24 | 11 | 0.3714286 | 0.57050785 | TRIM48     | OR4A16     |   |
| chr11 | +(57093395..57094479) | 1084 | 0.31019 | 16 | 8  | 8  | 0         | 0.95355402 | TNKS1BP1   | SSRP1      |   |
| chr11 | +(57126355..57127034) | 679  | 0.0294  | 12 | 6  | 6  | 0         | 0.00197388 | P2RX3      | PRG3       |   |
| chr11 | +(57234929..57235629) | 700  | 0.66276 | 10 | 5  | 5  | 0         | 0.00451172 | RTN4RL2    | SLC43A1    |   |
| chr11 | +(57256373..57257014) | 641  | 0.66276 | 9  | 4  | 5  | 0.1111111 | 0.008      | RTN4RL2    | SLC43A1    |   |
| chr11 | +(57947332..57947885) | 553  | 2.99724 | 9  | 4  | 5  | 0.1111111 | 0.032      | OR9I1      | OR9Q2      |   |
| chr11 | +(58170189..58170836) | 647  | 1.40219 | 7  | 4  | 3  | 0.1428571 | 0.029      | OR5B17     | OR5B3      |   |
| chr11 | +(58369241..58369921) | 680  | 2.99724 | 6  | 2  | 4  | 0.3333333 | 0.067      | ZFP91-CNTF | CNTF       |   |
| chr11 | +(60785642..60786182) | 540  | 2.99724 | 6  | 2  | 4  | 0.3333333 | 0.067      | CD6        | CD5        |   |
| chr11 | +(60996004..60996649) | 645  | 0.12171 | 39 | 27 | 12 | 0.3846154 | 0.01123944 | PGA4       | PGA5       |   |
| chr11 | +(61008526..61009060) | 534  | 1.55669 | 34 | 20 | 14 | 0.1764706 | 9.8127E-06 | PGA4       | PGA5       |   |

|       |                       |      |         |    |    |    |           |            |              |          |
|-------|-----------------------|------|---------|----|----|----|-----------|------------|--------------|----------|
| chr11 | +(61013504..61014025) | 521  | 0.66276 | 13 | 7  | 6  | 0.0769231 | 0.01113549 | PGA5         | VWCE     |
| chr11 | +(61017120..61017715) | 595  | 0.08468 | 25 | 14 | 11 | 0.12      | 0.00090285 | PGA5         | VWCE     |
| chr11 | +(61018342..61018891) | 549  | 2.99724 | 8  | 4  | 4  | 0         | 0.1        | PGA5         | VWCE     |
| chr11 | +(61133297..61133912) | 615  | 0.66276 | 11 | 5  | 6  | 0.0909091 | 0.00308495 | TMEM138      | TMEM216  |
| chr11 | +(61292315..61292927) | 612  | 0.66276 | 14 | 5  | 9  | 0.2857143 | 0.03593032 | LRRC10B      | SYT7     |
| chr11 | +(61453588..61454882) | 1294 | 1.40219 | 15 | 7  | 8  | 0.0666667 | 0.05259626 | DAGLA        | C11orf9  |
| chr11 | +(61492374..61493074) | 700  | 1.40219 | 8  | 3  | 5  | 0.25      | 0.018      | DAGLA        | C11orf9  |
| chr11 | +(61528904..61529486) | 582  | 0.66276 | 12 | 4  | 8  | 0.3333333 | 0.00328926 | DKFZP434K028 | C11orf10 |
| chr11 | +(61545867..61546529) | 662  | 2.99724 | 7  | 4  | 3  | 0.1428571 | 0.029      | DKFZP434K028 | C11orf10 |
| chr11 | +(61623934..61625267) | 1333 | 1.40219 | 14 | 7  | 7  | 0         | 0.99912744 | FADS2        | FADS3    |
| chr11 | +(61676201..61676895) | 694  | 0.14182 | 10 | 7  | 3  | 0.4       | 0.008      | FADS3        | RAB3IL1  |
| chr11 | +(61725414..61725941) | 527  | 2.99724 | 6  | 2  | 4  | 0.3333333 | 0.067      | BEST1        | FTH1     |
| chr11 | +(61729513..61730596) | 1083 | 0.66276 | 16 | 8  | 8  | 0         | 0.00316147 | BEST1        | FTH1     |
| chr11 | +(62140242..62140907) | 665  | 1.40219 | 9  | 3  | 6  | 0.3333333 | 0.048      | ASRGL1       | SCGB1A1  |
| chr11 | +(62186416..62186979) | 563  | 2.99724 | 6  | 2  | 4  | 0.3333333 | 0.067      | ASRGL1       | SCGB1A1  |
| chr11 | +(62289798..62290311) | 513  | 2.99724 | 9  | 5  | 4  | 0.1111111 | 0.016      | SCGB1A1      | AHNAK    |
| chr11 | +(62293536..62294052) | 516  | 2.99724 | 9  | 4  | 5  | 0.1111111 | 0.452      | SCGB1A1      | AHNAK    |
| chr11 | +(62299542..62300049) | 507  | 2.99724 | 8  | 5  | 3  | 0.25      | 0.5        | SCGB1A1      | AHNAK    |
| chr11 | +(62327463..62328043) | 580  | 2.99724 | 8  | 4  | 4  | 0         | 0.029      | AHNAK        | EEF1G    |
| chr11 | +(62339605..62340425) | 820  | 0.66276 | 16 | 7  | 9  | 0.125     | 0.00042755 | AHNAK        | EEF1G    |
| chr11 | +(62348434..62349064) | 630  | 2.99724 | 8  | 5  | 3  | 0.25      | 0.196      | EEF1G        | TUT1     |
| chr11 | +(62483030..62483534) | 504  | 2.99724 | 10 | 5  | 5  | 0         | 0.03790009 | GNG3         | HNRNPUL2 |
| chr11 | +(62533759..62534267) | 508  | 2.99724 | 11 | 5  | 6  | 0.0909091 | 0.07206352 | POLR2G       | TAF6L    |
| chr11 | +(62540957..62541480) | 523  | 2.99724 | 6  | 2  | 4  | 0.3333333 | 0.067      | TAF6L        | TMEM179B |
| chr11 | +(62545316..62545929) | 613  | 0.31019 | 11 | 6  | 5  | 0.0909091 | 0.00529357 | TAF6L        | TMEM179B |
| chr11 | +(62556551..62557084) | 533  | 2.99724 | 9  | 4  | 5  | 0.1111111 | 0.016      | TMEM179B     | TMEM223  |
| chr11 | +(62591536..62592232) | 696  | 0.31019 | 14 | 9  | 5  | 0.2857143 | 0.0013499  | NXF1         | STX5     |
| chr11 | +(62592521..62593221) | 700  | 0.31019 | 11 | 4  | 7  | 0.2727273 | 0.003      | NXF1         | STX5     |
| chr11 | +(62847211..62847740) | 529  | 2.99724 | 7  | 4  | 3  | 0.1428571 | 0.029      | SLC22A8      | SLC22A24 |
| chr11 | +(63312663..63313915) | 1252 | 0.0294  | 20 | 6  | 14 | 0.4       | 0.99332621 | RARRES3      | HRASLS2  |
| chr11 | +(63636539..63637239) | 700  | 0.66276 | 12 | 8  | 4  | 0.3333333 | 0.99671074 | MARK2        | RCOR2    |
| chr11 | +(63669540..63670063) | 523  | 0.14182 | 12 | 5  | 7  | 0.1666667 | 0.00368558 | MARK2        | RCOR2    |
| chr11 | +(63710377..63711077) | 700  | 2.99724 | 9  | 3  | 6  | 0.3333333 | 0.012      | NAA40        | COX8A    |
| chr11 | +(63843758..63844809) | 1051 | 0.31019 | 15 | 9  | 6  | 0.2       | 0.00073136 | OTUB1        | MACROD1  |

|       |                       |      |         |    |    |   |           |            |          |          |
|-------|-----------------------|------|---------|----|----|---|-----------|------------|----------|----------|
| chr11 | +(63849269..63849794) | 525  | 0.66276 | 8  | 5  | 3 | 0.25      | 0.018      | OTUB1    | MACROD1  |
| chr11 | +(64039208..64039907) | 699  | 2.99724 | 10 | 6  | 4 | 0.2       | 0.995      | PLCB3    | BAD      |
| chr11 | +(64044048..64044590) | 542  | 2.99724 | 6  | 4  | 2 | 0.3333333 | 0.067      | PLCB3    | BAD      |
| chr11 | +(64116045..64116745) | 700  | 1.40219 | 10 | 3  | 7 | 0.4       | 0.742      | CCDC88B  | RPS6KA4  |
| chr11 | +(64128319..64128837) | 518  | 0.66276 | 8  | 3  | 5 | 0.25      | 0.018      | RPS6KA4  | MIR1237  |
| chr11 | +(64418297..64418997) | 700  | 0.66276 | 10 | 7  | 3 | 0.4       | 0.058      | SLC22A12 | NRXN2    |
| chr11 | +(64453109..64453737) | 628  | 0.31019 | 9  | 3  | 6 | 0.3333333 | 0.012      | SLC22A12 | NRXN2    |
| chr11 | +(64502501..64503070) | 569  | 2.99724 | 6  | 2  | 4 | 0.3333333 | 0.067      | NRXN2    | RASGRP2  |
| chr11 | +(64543685..64544302) | 617  | 2.99724 | 9  | 4  | 5 | 0.1111111 | 0.032      | PYGM     | SF1      |
| chr11 | +(64556702..64557701) | 999  | 0.66276 | 16 | 9  | 7 | 0.125     | 0.94956952 | SF1      | MAP4K2   |
| chr11 | +(64757534..64758234) | 700  | 0.31019 | 14 | 9  | 5 | 0.2857143 | 0.0013499  | C11orf85 | BATF2    |
| chr11 | +(65178723..65179468) | 745  | 0.0294  | 14 | 8  | 6 | 0.1428571 | 0.0140929  | FRMD8    | NEAT1    |
| chr11 | +(65311377..65312107) | 730  | 1.40219 | 13 | 6  | 7 | 0.0769231 | 0.0013499  | SCYL1    | LTBP3    |
| chr11 | +(65382788..65383488) | 700  | 0.66276 | 12 | 5  | 7 | 0.1666667 | 0.00224163 | MAP3K11  | PCNXL3   |
| chr11 | +(65384648..65385593) | 945  | 0.66276 | 19 | 10 | 9 | 0.0526316 | 0.94876478 | PCNXL3   | SIPA1    |
| chr11 | +(65396440..65397048) | 608  | 0.00742 | 17 | 10 | 7 | 0.1764706 | 0.08592868 | PCNXL3   | SIPA1    |
| chr11 | +(65631335..65632025) | 690  | 0.66276 | 8  | 5  | 3 | 0.25      | 0.018      | MUS81    | EFEMP2   |
| chr11 | +(66033694..66034394) | 700  | 0.0294  | 13 | 9  | 4 | 0.3846154 | 0.001      | KLC2     | RAB1B    |
| chr11 | +(66106103..66106803) | 700  | 0.31019 | 12 | 5  | 7 | 0.1666667 | 0.71511782 | RIN1     | BRMS1    |
| chr11 | +(66138535..66139066) | 531  | 2.99724 | 6  | 3  | 3 | 0         | 0.05       | B3GNT1   | SLC29A2  |
| chr11 | +(66181224..66181818) | 594  | 1.40219 | 7  | 4  | 3 | 0.1428571 | 0.029      | SLC29A2  | NPAS4    |
| chr11 | +(66333430..66334130) | 700  | 0.66276 | 9  | 4  | 5 | 0.1111111 | 0.008      | ACTN3    | CTSF     |
| chr11 | +(66359307..66359977) | 670  | 1.40219 | 10 | 7  | 3 | 0.4       | 0.992      | CTSF     | CCDC87   |
| chr11 | +(66370578..66371278) | 700  | 1.40219 | 12 | 7  | 5 | 0.1666667 | 0.99775837 | CCS      | RBM14    |
| chr11 | +(66453546..66454450) | 904  | 0.31019 | 15 | 9  | 6 | 0.2       | 0.00073136 | RBM4B    | SPTBN2   |
| chr11 | +(66680004..66681029) | 1025 | 0.00742 | 20 | 13 | 7 | 0.3       | 0.39075565 | RCE1     | PC       |
| chr11 | +(66809235..66809757) | 522  | 2.99724 | 6  | 3  | 3 | 0         | 0.05       | SYT12    | RHOD     |
| chr11 | +(66812970..66813515) | 545  | 2.99724 | 6  | 3  | 3 | 0         | 0.05       | SYT12    | RHOD     |
| chr11 | +(67046437..67046958) | 521  | 1.40219 | 7  | 4  | 3 | 0.1428571 | 0.029      | ADRBK1   | ANKRD13D |
| chr11 | +(67133434..67134134) | 700  | 1.40219 | 12 | 5  | 7 | 0.1666667 | 0.99775837 | POLD4    | CLCF1    |
| chr11 | +(67158930..67159505) | 575  | 1.40219 | 11 | 7  | 4 | 0.2727273 | 0.394      | CLCF1    | RAD9A    |
| chr11 | +(67196398..67197038) | 640  | 1.40219 | 8  | 4  | 4 | 0         | 0.171      | RPS6KB2  | PTPRCAP  |
| chr11 | +(67208689..67209284) | 595  | 1.40219 | 9  | 3  | 6 | 0.3333333 | 0.274      | PTPRCAP  | CORO1B   |
| chr11 | +(67289683..67290234) | 551  | 1.40219 | 9  | 4  | 5 | 0.1111111 | 0.095      | CDK2AP2  | CABP2    |

|       |                       |      |         |     |    |    |           |            |          |           |   |
|-------|-----------------------|------|---------|-----|----|----|-----------|------------|----------|-----------|---|
| chr11 | +(67292825..67294118) | 1293 | 0.14182 | 19  | 12 | 7  | 0.2631579 | 0.00019287 | CABP2    | GSTP1     |   |
| chr11 | +(67308706..67310040) | 1334 | 0.14182 | 17  | 9  | 8  | 0.0588235 | 0.00468738 | CABP2    | GSTP1     |   |
| chr11 | +(67310868..67311443) | 575  | 2.99724 | 7   | 3  | 4  | 0.1428571 | 0.2        | CABP2    | GSTP1     |   |
| chr11 | +(67560591..67561239) | 648  | 0.31019 | 14  | 9  | 5  | 0.2857143 | 0.12853715 | ALDH3B2  | LOC645332 |   |
| chr11 | +(67792439..67793110) | 671  | 0.14182 | 10  | 6  | 4  | 0.2       | 0.005      | ALDH3B1  | NDUFS8    |   |
| chr11 | +(67911818..67912920) | 1102 | 2.99724 | 12  | 6  | 6  | 0         | 0.99802612 | CHKA     | SUV420H1  |   |
| chr11 | +(67926122..67926710) | 588  | 1.40219 | 8   | 5  | 3  | 0.25      | 0.018      | CHKA     | SUV420H1  |   |
| chr11 | +(68025612..68026312) | 700  | 0.01969 | 13  | 5  | 8  | 0.2307692 | 0.0017074  | SUV420H1 | C11orf24  |   |
| chr11 | +(68091621..68092765) | 1144 | 0.01969 | 19  | 13 | 6  | 0.3684211 | 0.9996875  | LRP5     | PPP6R3    |   |
| chr11 | +(68147672..68148193) | 521  | 0.66276 | 8   | 3  | 5  | 0.25      | 0.018      | LRP5     | PPP6R3    |   |
| chr11 | +(68196539..68197239) | 700  | 2.99724 | 11  | 5  | 6  | 0.0909091 | 0.97769514 | LRP5     | PPP6R3    |   |
| chr11 | +(68334413..68334930) | 517  | 1.40219 | 8   | 5  | 3  | 0.25      | 0.018      | PPP6R3   | GAL       |   |
| chr11 | +(68380300..68380947) | 647  | 0.01969 | 14  | 5  | 9  | 0.2857143 | 0.0013499  | PPP6R3   | GAL       |   |
| chr11 | +(68680193..68680739) | 546  | 0.66276 | 8   | 4  | 4  | 0         | 0.014      | IGHMBP2  | MRGPRD    |   |
| chr11 | +(69205647..69206209) | 562  | 0.66276 | 8   | 5  | 3  | 0.25      | 0.018      | MYEOV    | CCND1     |   |
| chr11 | +(69213928..69214571) | 643  | 2.99724 | 6   | 2  | 4  | 0.3333333 | 0.067      | MYEOV    | CCND1     |   |
| chr11 | +(69291525..69292849) | 1324 | 0.14182 | 18  | 8  | 10 | 0.1111111 | 0.00018964 | MYEOV    | CCND1     |   |
| chr11 | +(69360529..69361229) | 700  | 0.00019 | 20  | 10 | 10 | 0         | 7.8526E-05 | MYEOV    | CCND1     |   |
| chr11 | +(69407676..69408335) | 659  | 2.99724 | 6   | 3  | 3  | 0         | 0.05       | MYEOV    | CCND1     |   |
| chr11 | +(69408346..69408868) | 522  | 1.40219 | 7   | 3  | 4  | 0.1428571 | 0.029      | MYEOV    | CCND1     |   |
| chr11 | +(69454450..69456065) | 1615 | 1.3E-05 | 159 | 93 | 66 | 0.1698113 | 0.20569289 | MYEOV    | CCND1     |   |
| chr11 | +(69587978..69588491) | 513  | 0.31019 | 9   | 3  | 6  | 0.3333333 | 0.012      | FGF19    | FGF4      |   |
| chr11 | +(69623618..69624318) | 700  | 0.0039  | 21  | 12 | 9  | 0.1428571 | 0.00014481 | FGF4     | FGF3      | v |
| chr11 | +(69625280..69625978) | 698  | 2.99724 | 9   | 4  | 5  | 0.1111111 | 0.857      | FGF4     | FGF3      | v |
| chr11 | +(69636630..69637248) | 618  | 0.66276 | 8   | 5  | 3  | 0.25      | 0.018      | FGF3     | ANO1      | v |
| chr11 | +(69649430..69649990) | 560  | 2.99724 | 6   | 2  | 4  | 0.3333333 | 0.067      | FGF3     | ANO1      | v |
| chr11 | +(69788688..69789258) | 570  | 1.40219 | 8   | 5  | 3  | 0.25      | 0.018      | FGF3     | ANO1      | v |
| chr11 | +(69811508..69812207) | 699  | 0.31019 | 9   | 6  | 3  | 0.3333333 | 0.012      | FGF3     | ANO1      | v |
| chr11 | +(70269985..70270685) | 700  | 0.14182 | 12  | 7  | 5  | 0.1666667 | 0.28488218 | CTTN     | SHANK2    |   |
| chr11 | +(70426509..70427123) | 614  | 0.14182 | 11  | 7  | 4  | 0.2727273 | 0.036      | CTTN     | SHANK2    |   |
| chr11 | +(70440162..70440868) | 706  | 0.0294  | 14  | 9  | 5  | 0.2857143 | 0.0013499  | CTTN     | SHANK2    |   |
| chr11 | +(70441491..70442191) | 700  | 0.01969 | 13  | 8  | 5  | 0.2307692 | 0.0017074  | CTTN     | SHANK2    |   |
| chr11 | +(70514393..70514924) | 531  | 1.40219 | 11  | 7  | 4  | 0.2727273 | 0.997      | CTTN     | SHANK2    |   |
| chr11 | +(70557407..70558598) | 1191 | 0.66276 | 14  | 6  | 8  | 0.1428571 | 0.00097289 | CTTN     | SHANK2    |   |

|       |                       |      |         |    |    |    |           |            |              |           |
|-------|-----------------------|------|---------|----|----|----|-----------|------------|--------------|-----------|
| chr11 | +(70591079..70591814) | 735  | 0.00031 | 19 | 10 | 9  | 0.0526316 | 0.00011928 | CTTN         | SHANK2    |
| chr11 | +(70644403..70644945) | 542  | 0.31019 | 11 | 6  | 5  | 0.0909091 | 0.00308495 | CTTN         | SHANK2    |
| chr11 | +(70687349..70688049) | 700  | 0.0294  | 12 | 8  | 4  | 0.3333333 | 0.99671074 | CTTN         | SHANK2    |
| chr11 | +(70753036..70753736) | 700  | 0.31019 | 9  | 3  | 6  | 0.3333333 | 0.012      | CTTN         | SHANK2    |
| chr11 | +(70856215..70856838) | 623  | 0.14182 | 10 | 6  | 4  | 0.2       | 0.005      | CTTN         | SHANK2    |
| chr11 | +(71151892..71152508) | 616  | 0.08468 | 14 | 9  | 5  | 0.2857143 | 0.00981533 | MIR3664      | DHCR7     |
| chr11 | +(71192487..71193402) | 915  | 0.66276 | 16 | 6  | 10 | 0.25      | 0.00119462 | NADSYN1      | KRTAP5-7  |
| chr11 | +(71276267..71276852) | 585  | 0.66276 | 13 | 7  | 6  | 0.0769231 | 0.4432015  | KRTAP5-9     | KRTAP5-10 |
| chr11 | +(71293237..71293918) | 681  | 0.31019 | 19 | 11 | 8  | 0.1578947 | 0.31014701 | KRTAP5-10    | KRTAP5-11 |
| chr11 | +(71639736..71640436) | 700  | 0.08468 | 11 | 7  | 4  | 0.2727273 | 0.003      | LOC100133315 | RNF121    |
| chr11 | +(72004411..72005635) | 1224 | 0.26018 | 26 | 11 | 15 | 0.1538462 | 0.01562608 | PHOX2A       | CLPB      |
| chr11 | +(72047126..72048013) | 887  | 0.00085 | 17 | 11 | 6  | 0.2941176 | 0.00045556 | PHOX2A       | CLPB      |
| chr11 | +(72294659..72295569) | 910  | 0.66276 | 14 | 8  | 6  | 0.1428571 | 0.99902711 | CLPB         | PDE2A     |
| chr11 | +(72380237..72380937) | 700  | 0.08468 | 11 | 5  | 6  | 0.0909091 | 0.00308495 | CLPB         | PDE2A     |
| chr11 | +(72945630..72946312) | 682  | 2.99724 | 8  | 5  | 3  | 0.25      | 0.018      | P2RY2        | P2RY6     |
| chr11 | +(73026048..73026748) | 700  | 1.40219 | 14 | 7  | 7  | 0         | 0.32736042 | ARHGEF17     | RELT      |
| chr11 | +(74687458..74688158) | 700  | 1.40219 | 13 | 6  | 7  | 0.0769231 | 0.84134475 | SPCS2        | NEU3      |
| chr11 | +(74910984..74911684) | 700  | 0.08468 | 12 | 4  | 8  | 0.3333333 | 0.00328926 | SLCO2B1      | LOC441617 |
| chr11 | +(74953035..74953602) | 567  | 2.99724 | 9  | 3  | 6  | 0.3333333 | 0.988      | LOC441617    | ARRB1     |
| chr11 | +(75161666..75162268) | 602  | 1.40219 | 10 | 3  | 7  | 0.4       | 0.008      | KLHL35       | GDPD5     |
| chr11 | +(75298299..75298847) | 548  | 0.31019 | 13 | 5  | 8  | 0.2307692 | 0.02021199 | SERPINH1     | MAP6      |
| chr11 | +(75946826..75947486) | 660  | 2.99724 | 10 | 6  | 4  | 0.2       | 0.005      | WNT11        | PRKRIR    |
| chr11 | +(76010894..76011396) | 502  | 1.40219 | 7  | 3  | 4  | 0.1428571 | 0.029      | WNT11        | PRKRIR    |
| chr11 | +(76061672..76062228) | 556  | 1.40219 | 11 | 5  | 6  | 0.0909091 | 0.07206352 | WNT11        | PRKRIR    |
| chr11 | +(76062889..76063550) | 661  | 0.66276 | 18 | 7  | 11 | 0.2222222 | 0.19478884 | WNT11        | PRKRIR    |
| chr11 | +(76260920..76261421) | 501  | 2.99724 | 6  | 4  | 2  | 0.3333333 | 0.067      | C11orf30     | LRRC32    |
| chr11 | +(76300041..76300597) | 556  | 2.99724 | 11 | 6  | 5  | 0.0909091 | 0.00308495 | C11orf30     | LRRC32    |
| chr11 | +(76318891..76319438) | 547  | 2.99724 | 6  | 2  | 4  | 0.3333333 | 0.067      | C11orf30     | LRRC32    |
| chr11 | +(79119945..79120646) | 701  | 0.08468 | 12 | 8  | 4  | 0.3333333 | 0.99671074 | NARS2        | ODZ4      |
| chr11 | +(83877765..83878345) | 580  | 2.99724 | 7  | 3  | 4  | 0.1428571 | 0.029      | CCDC90B      | DLG2      |
| chr11 | +(85195201..85195725) | 524  | 1.40219 | 14 | 7  | 7  | 0         | 0.99912744 | CCDC90B      | DLG2      |
| chr11 | +(86103336..86103921) | 585  | 0.0294  | 14 | 9  | 5  | 0.2857143 | 0.0013499  | CCDC81       | ME3       |
| chr11 | +(89133217..89133880) | 663  | 1.40219 | 11 | 7  | 4  | 0.2727273 | 0.206      | TYR          | NOX4      |
| chr11 | +(96117411..96117947) | 536  | 0.14182 | 15 | 7  | 8  | 0.0666667 | 0.00544818 | MIR1260B     | CCDC82    |



|       |                         |      |         |    |    |    |           |            |              |              |
|-------|-------------------------|------|---------|----|----|----|-----------|------------|--------------|--------------|
| chr11 | +(100830355..100830858) | 503  | 2.99724 | 6  | 4  | 2  | 0.3333333 | 0.067      | ARHGAP42     | TMEM133      |
| chr11 | +(108044093..108044603) | 510  | 2.99724 | 10 | 7  | 3  | 0.4       | 0.033      | ACAT1        | NPAT         |
| chr11 | +(108263818..108264347) | 529  | 2.99724 | 7  | 3  | 4  | 0.1428571 | 0.029      | ATM          | C11orf65     |
| chr11 | +(110450914..110451452) | 538  | 0.31019 | 11 | 6  | 5  | 0.0909091 | 0.00529357 | FDX1         | ARHGAP20     |
| chr11 | +(111866008..111866511) | 503  | 2.99724 | 6  | 4  | 2  | 0.3333333 | 0.067      | DIXDC1       | DLAT         |
| chr11 | +(113629061..113629613) | 552  | 1.40219 | 9  | 4  | 5  | 0.1111111 | 0.056      | TMPRSS5      | ZW10         |
| chr11 | +(113928872..113929438) | 566  | 2.99724 | 6  | 4  | 2  | 0.3333333 | 0.067      | HTR3A        | ZBTB16       |
| chr11 | +(113934199..113934835) | 636  | 0.66276 | 8  | 3  | 5  | 0.25      | 0.018      | ZBTB16       | NNMT         |
| chr11 | +(114014456..114015156) | 700  | 0.00341 | 15 | 5  | 10 | 0.3333333 | 0.00109982 | ZBTB16       | NNMT         |
| chr11 | +(117246185..117246780) | 595  | 1.40219 | 9  | 4  | 5  | 0.1111111 | 0.016      | CEP164       | DSCAML1      |
| chr11 | +(117367581..117368160) | 579  | 1.40219 | 7  | 4  | 3  | 0.1428571 | 0.029      | CEP164       | DSCAML1      |
| chr11 | +(117738930..117740843) | 1913 | 0.08468 | 24 | 11 | 13 | 0.0833333 | 1.718E-05  | FXYD2        | FXYD6        |
| chr11 | +(118777615..118778282) | 667  | 1.40219 | 7  | 3  | 4  | 0.1428571 | 0.029      | CXCR5        | BCL9L        |
| chr11 | +(120846309..120847681) | 1372 | 1.40219 | 13 | 6  | 7  | 0.0769231 | 0.0013499  | GRIK4        | TBCEL        |
| chr11 | +(121007991..121008582) | 591  | 2.99724 | 7  | 3  | 4  | 0.1428571 | 0.314      | TECTA        | SC5DL        |
| chr11 | +(121177753..121178373) | 620  | 1.40219 | 13 | 8  | 5  | 0.2307692 | 0.92838254 | SC5DL        | SORL1        |
| chr11 | +(121232441..121233030) | 589  | 1.40219 | 10 | 7  | 3  | 0.4       | 0.092      | SC5DL        | SORL1        |
| chr11 | +(121367839..121368899) | 1060 | 1.40219 | 13 | 7  | 6  | 0.0769231 | 0.0013499  | SORL1        | LOC399959    |
| chr11 | +(122542029..122542729) | 700  | 0.01969 | 13 | 4  | 9  | 0.3846154 | 0.001      | UBASH3B      | CRTAM        |
| chr11 | +(122944205..122944716) | 511  | 2.99724 | 9  | 6  | 3  | 0.3333333 | 0.19       | HSPA8        | ASAM         |
| chr11 | +(123396400..123397093) | 693  | 0.66276 | 8  | 5  | 3  | 0.25      | 0.018      | ASAM         | GRAMD1B      |
| chr11 | +(123439173..123439873) | 700  | 0.0294  | 12 | 5  | 7  | 0.1666667 | 0.00224163 | GRAMD1B      | SCN3B        |
| chr11 | +(128842794..128843458) | 664  | 1.40219 | 17 | 6  | 11 | 0.2941176 | 0.54002781 | TP53AIP1     | ARHGAP32     |
| chr11 | +(131074366..131075251) | 885  | 0.14182 | 17 | 7  | 10 | 0.1764706 | 0.00031815 | SNX19        | NTM          |
| chr11 | +(131684822..131685522) | 700  | 0.00742 | 14 | 9  | 5  | 0.2857143 | 0.0013499  | NTM          | OPCML        |
| chr12 | +(90483..90990)         | 507  | 3.08111 | 11 | 7  | 4  | 0.2727273 | 0.003      | LOC100288778 | FAM138D      |
| chr12 | +(651083..651763)       | 680  | 0.29741 | 9  | 3  | 6  | 0.3333333 | 0.012      | B4GALNT3     | NINJ2        |
| chr12 | +(1219101..1219602)     | 501  | 3.08111 | 10 | 4  | 6  | 0.2       | 0.457      | ERC1         | LOC100292680 |
| chr12 | +(1772195..1772834)     | 639  | 0.69993 | 8  | 4  | 4  | 0         | 0.014      | MIR3649      | ADIPOR2      |
| chr12 | +(1865342..1866554)     | 1212 | 0.03249 | 19 | 7  | 12 | 0.2631579 | 0.99980713 | ADIPOR2      | CACNA2D4     |
| chr12 | +(1939930..1940610)     | 680  | 0.69993 | 13 | 7  | 6  | 0.0769231 | 0.00757922 | ADIPOR2      | CACNA2D4     |
| chr12 | +(2714510..2715073)     | 563  | 0.29741 | 12 | 5  | 7  | 0.1666667 | 0.00368558 | CACNA1C      | LOC283440    |
| chr12 | +(3232156..3232849)     | 693  | 0.69993 | 8  | 5  | 3  | 0.25      | 0.018      | TSPAN9       | PRMT8        |
| chr12 | +(3298015..3299079)     | 1064 | 0.06632 | 21 | 11 | 10 | 0.047619  | 0.99994624 | TSPAN9       | PRMT8        |

|       |                       |      |         |     |    |    |           |            |           |          |
|-------|-----------------------|------|---------|-----|----|----|-----------|------------|-----------|----------|
| chr12 | +(3387753..3388323)   | 570  | 3.08111 | 8   | 4  | 4  | 0         | 0.443      | TSPAN9    | PRMT8    |
| chr12 | +(3414561..3415261)   | 700  | 0.12742 | 10  | 4  | 6  | 0.2       | 0.005      | TSPAN9    | PRMT8    |
| chr12 | +(3423251..3423845)   | 594  | 3.08111 | 6   | 4  | 2  | 0.3333333 | 0.067      | TSPAN9    | PRMT8    |
| chr12 | +(3524877..3525554)   | 677  | 1.46883 | 7   | 4  | 3  | 0.1428571 | 0.029      | TSPAN9    | PRMT8    |
| chr12 | +(4648724..4649240)   | 516  | 0.29741 | 9   | 5  | 4  | 0.1111111 | 0.008      | RAD51AP1  | DYRK4    |
| chr12 | +(5694701..5695310)   | 609  | 3.08111 | 9   | 3  | 6  | 0.3333333 | 0.988      | NTF3      | ANO2     |
| chr12 | +(5983598..5984198)   | 600  | 1.46883 | 7   | 3  | 4  | 0.1428571 | 0.029      | NTF3      | ANO2     |
| chr12 | +(6092038..6092620)   | 582  | 1.46883 | 7   | 4  | 3  | 0.1428571 | 0.029      | ANO2      | VWF      |
| chr12 | +(6100737..6101359)   | 622  | 1.46883 | 7   | 4  | 3  | 0.1428571 | 0.029      | ANO2      | VWF      |
| chr12 | +(6128567..6129098)   | 531  | 3.08111 | 11  | 7  | 4  | 0.2727273 | 0.036      | ANO2      | VWF      |
| chr12 | +(6228274..6228830)   | 556  | 0.69993 | 8   | 5  | 3  | 0.25      | 0.018      | ANO2      | VWF      |
| chr12 | +(6324545..6325064)   | 519  | 0.69993 | 8   | 4  | 4  | 0         | 0.014      | CD9       | PLEKHG6  |
| chr12 | +(6438833..6439754)   | 921  | 3.08111 | 15  | 9  | 6  | 0.2       | 0.31867594 | PLEKHG6   | TNFRSF1A |
| chr12 | +(6778952..6779652)   | 700  | 0.69993 | 10  | 3  | 7  | 0.4       | 0.742      | ING4      | ZNF384   |
| chr12 | +(6940748..6941416)   | 668  | 0.12742 | 10  | 4  | 6  | 0.2       | 0.005      | LEPREL2   | GNB3     |
| chr12 | +(6949867..6950567)   | 700  | 3.08111 | 9   | 3  | 6  | 0.3333333 | 0.988      | GNB3      | CDCA3    |
| chr12 | +(6952361..6952947)   | 586  | 1.46883 | 13  | 9  | 4  | 0.3846154 | 0.355      | GNB3      | CDCA3    |
| chr12 | +(6980714..6981414)   | 700  | 0.69993 | 11  | 6  | 5  | 0.0909091 | 0.70805879 | TPI1      | SPSB2    |
| chr12 | +(7045867..7046384)   | 517  | 3.08111 | 10  | 6  | 4  | 0.2       | 0.457      | ATN1      | C12orf57 |
| chr12 | +(7653528..7654076)   | 548  | 0.69993 | 10  | 6  | 4  | 0.2       | 0.057      | CD163L1   | CD163    |
| chr12 | +(9072186..9072706)   | 520  | 3.08111 | 6   | 4  | 2  | 0.3333333 | 0.067      | PHC1      | M6PR     |
| chr12 | +(9312511..9313064)   | 553  | 3.08111 | 10  | 6  | 4  | 0.2       | 0.129      | A2M       | PZP      |
| chr12 | +(10305883..10306583) | 700  | 0.29741 | 9   | 3  | 6  | 0.3333333 | 0.012      | CLEC7A    | OLR1     |
| chr12 | +(10319149..10319713) | 564  | 1.46883 | 10  | 6  | 4  | 0.2       | 0.005      | CLEC7A    | OLR1     |
| chr12 | +(10370560..10371402) | 842  | 0.03249 | 15  | 6  | 9  | 0.2       | 0.00073136 | GABARAPL1 | KLRD1    |
| chr12 | +(11060890..11061428) | 538  | 3.08111 | 7   | 4  | 3  | 0.1428571 | 0.2        | TAS2R10   | PRR4     |
| chr12 | +(11214061..11214585) | 524  | 3.08111 | 12  | 5  | 7  | 0.1666667 | 0.53235847 | TAS2R10   | PRR4     |
| chr12 | +(11243502..11244102) | 600  | 0.12742 | 22  | 8  | 14 | 0.2727273 | 0.12296535 | TAS2R10   | PRR4     |
| chr12 | +(11506080..11507106) | 1026 | 0.64527 | 69  | 35 | 34 | 0.0144928 | 0.48085429 | PRB4      | PRB1     |
| chr12 | +(11546133..11547042) | 909  | 0.54621 | 116 | 54 | 62 | 0.0689655 | 0.10549031 | PRB1      | PRB2     |
| chr12 | +(12618115..12618815) | 700  | 3.08111 | 10  | 4  | 6  | 0.2       | 0.129      | LOH12CR1  | DUSP16   |
| chr12 | +(12763947..12764891) | 944  | 0.00834 | 21  | 14 | 7  | 0.3333333 | 0.00017112 | DUSP16    | CREBL2   |
| chr12 | +(18434762..18435273) | 511  | 1.46883 | 9   | 3  | 6  | 0.3333333 | 0.012      | PIK3C2G   | PLCZ1    |
| chr12 | +(21294133..21295002) | 869  | 3.08111 | 12  | 6  | 6  | 0         | 0.37438702 | SLCO1B1   | SLCO1A2  |

|       |                       |     |         |    |    |    |           |            |           |          |
|-------|-----------------------|-----|---------|----|----|----|-----------|------------|-----------|----------|
| chr12 | +(21621237..21621751) | 514 | 1.46883 | 11 | 4  | 7  | 0.2727273 | 0.006      | PYROXD1   | RECQL    |
| chr12 | +(22624406..22624914) | 508 | 1.46883 | 10 | 7  | 3  | 0.4       | 0.033      | ST8SIA1   | KIAA0528 |
| chr12 | +(25313832..25314565) | 733 | 0.00185 | 18 | 10 | 8  | 0.1111111 | 0.00018964 | LRMP      | CASC1    |
| chr12 | +(30869371..30869893) | 522 | 3.08111 | 12 | 7  | 5  | 0.1666667 | 0.08373231 | IPO8      | CAPRIN2  |
| chr12 | +(31237470..31238016) | 546 | 2.19401 | 27 | 18 | 9  | 0.3333333 | 0.00023478 | DDX11     | FAM60A   |
| chr12 | +(31255687..31256522) | 835 | 0.39347 | 23 | 15 | 8  | 0.3043478 | 0.00049732 | DDX11     | FAM60A   |
| chr12 | +(32134137..32134742) | 605 | 3.08111 | 7  | 3  | 4  | 0.1428571 | 0.029      | C12orf35  | BICD1    |
| chr12 | +(32328110..32328715) | 605 | 1.46883 | 7  | 4  | 3  | 0.1428571 | 0.029      | BICD1     | FGD4     |
| chr12 | +(41659665..41660365) | 700 | 0.29741 | 9  | 3  | 6  | 0.3333333 | 0.012      | PDZRN4    | GXYLT1   |
| chr12 | +(44770156..44770661) | 505 | 3.08111 | 7  | 3  | 4  | 0.1428571 | 0.114      | TMEM117   | NELL2    |
| chr12 | +(44913503..44914019) | 516 | 3.08111 | 9  | 5  | 4  | 0.1111111 | 0.056      | TMEM117   | NELL2    |
| chr12 | +(48139179..48139748) | 569 | 0.12742 | 10 | 4  | 6  | 0.2       | 0.005      | ENDOU     | RAPGEF3  |
| chr12 | +(48141022..48141747) | 725 | 0.01356 | 14 | 8  | 6  | 0.1428571 | 0.01943355 | ENDOU     | RAPGEF3  |
| chr12 | +(48238016..48238687) | 671 | 0.01356 | 16 | 10 | 6  | 0.25      | 0.00334766 | HDAC7     | VDR      |
| chr12 | +(48251003..48251659) | 656 | 1.46883 | 10 | 6  | 4  | 0.2       | 0.543      | HDAC7     | VDR      |
| chr12 | +(49496630..49497160) | 530 | 3.08111 | 8  | 5  | 3  | 0.25      | 0.018      | DHH       | LMBR1L   |
| chr12 | +(49979046..49979664) | 618 | 3.08111 | 6  | 3  | 3  | 0         | 0.05       | MCRS1     | FAM186B  |
| chr12 | +(50263787..50264687) | 900 | 0.29741 | 15 | 5  | 10 | 0.3333333 | 0.19563364 | BCDIN3D   | FAIM2    |
| chr12 | +(50291323..50292023) | 700 | 0.06632 | 11 | 4  | 7  | 0.2727273 | 0.003      | BCDIN3D   | FAIM2    |
| chr12 | +(50323282..50323886) | 604 | 3.08111 | 6  | 4  | 2  | 0.3333333 | 0.067      | LOC283332 | AQP2     |
| chr12 | +(50348253..50348949) | 696 | 0.69993 | 10 | 7  | 3  | 0.4       | 0.008      | AQP2      | AQP5     |
| chr12 | +(50725337..50725916) | 579 | 3.08111 | 8  | 5  | 3  | 0.25      | 0.286      | MIR1293   | FAM186A  |
| chr12 | +(50747725..50748425) | 700 | 0.03249 | 20 | 8  | 12 | 0.2       | 0.00677733 | MIR1293   | FAM186A  |
| chr12 | +(50748568..50749124) | 556 | 3.08111 | 10 | 6  | 4  | 0.2       | 0.238      | MIR1293   | FAM186A  |
| chr12 | +(51419840..51420410) | 570 | 0.69993 | 8  | 5  | 3  | 0.25      | 0.018      | HIGD1C    | SLC11A2  |
| chr12 | +(51688549..51689249) | 700 | 0.69993 | 12 | 4  | 8  | 0.3333333 | 0.00328926 | SMAGP     | BIN2     |
| chr12 | +(51882297..51882854) | 557 | 1.46883 | 9  | 4  | 5  | 0.1111111 | 0.008      | SLC4A8    | SCN8A    |
| chr12 | +(52080745..52081286) | 541 | 3.08111 | 7  | 4  | 3  | 0.1428571 | 0.029      | SCN8A     | FIGNL2   |
| chr12 | +(52200192..52200709) | 517 | 3.08111 | 11 | 4  | 7  | 0.2727273 | 0.264      | SCN8A     | FIGNL2   |
| chr12 | +(52565803..52566359) | 556 | 1.46883 | 8  | 3  | 5  | 0.25      | 0.125      | C12orf44  | KRT80    |
| chr12 | +(52821723..52822413) | 690 | 1.46883 | 10 | 4  | 6  | 0.2       | 0.381      | KRT82     | KRT75    |
| chr12 | +(52884685..52885222) | 537 | 0.69993 | 12 | 8  | 4  | 0.3333333 | 0.99671074 | KRT6C     | KRT6A    |
| chr12 | +(52886230..52886822) | 592 | 0.00023 | 23 | 16 | 7  | 0.3913043 | 0.000256   | KRT6C     | KRT6A    |
| chr12 | +(53001851..53002470) | 619 | 1.46883 | 11 | 7  | 4  | 0.2727273 | 0.158      | KRT72     | KRT73    |

|       |                       |      |         |    |    |    |           |            |          |           |
|-------|-----------------------|------|---------|----|----|----|-----------|------------|----------|-----------|
| chr12 | +(53008702..53009260) | 558  | 3.08111 | 6  | 4  | 2  | 0.3333333 | 0.067      | KRT72    | KRT73     |
| chr12 | +(53009873..53010433) | 560  | 3.08111 | 9  | 3  | 6  | 0.3333333 | 0.048      | KRT72    | KRT73     |
| chr12 | +(53037324..53038024) | 700  | 0.06632 | 11 | 7  | 4  | 0.2727273 | 0.003      | KRT73    | KRT2      |
| chr12 | +(53170464..53171108) | 644  | 0.69993 | 9  | 6  | 3  | 0.3333333 | 0.012      | KRT77    | KRT76     |
| chr12 | +(53189008..53189759) | 751  | 0.00185 | 30 | 11 | 19 | 0.2666667 | 0.00011679 | KRT76    | KRT3      |
| chr12 | +(53205629..53206179) | 550  | 3.08111 | 13 | 6  | 7  | 0.0769231 | 0.76247474 | KRT3     | KRT4      |
| chr12 | +(53345249..53345995) | 746  | 0.03249 | 15 | 9  | 6  | 0.2       | 0.03854994 | KRT18    | EIF4B     |
| chr12 | +(53427305..53427830) | 525  | 1.46883 | 14 | 7  | 7  | 0         | 0.04226675 | EIF4B    | LOC283335 |
| chr12 | +(53440352..53441325) | 973  | 0.69993 | 14 | 6  | 8  | 0.1428571 | 0.00097289 | EIF4B    | LOC283335 |
| chr12 | +(53457644..53458344) | 700  | 0.12742 | 14 | 6  | 8  | 0.1428571 | 0.84915021 | TENC1    | SPRYD3    |
| chr12 | +(53494343..53495043) | 700  | 0.00388 | 17 | 9  | 8  | 0.0588235 | 0.000266   | IGFBP6   | SOAT2     |
| chr12 | +(53590568..53591209) | 641  | 3.08111 | 6  | 3  | 3  | 0         | 0.05       | ZNF740   | ITGB7     |
| chr12 | +(53647370..53647933) | 563  | 0.69993 | 11 | 7  | 4  | 0.2727273 | 0.158      | MFSD5    | ESPL1     |
| chr12 | +(53898236..53899388) | 1152 | 1.46883 | 14 | 7  | 7  | 0         | 0.99912744 | TARBP2   | NPFF      |
| chr12 | +(53928092..53928731) | 639  | 1.46883 | 9  | 6  | 3  | 0.3333333 | 0.012      | NPFF     | ATF7      |
| chr12 | +(55042078..55042778) | 700  | 3.08111 | 10 | 6  | 4  | 0.2       | 0.005      | LACRT    | DCD       |
| chr12 | +(56087705..56088320) | 615  | 3.08111 | 8  | 5  | 3  | 0.25      | 0.393      | METTL7B  | ITGA7     |
| chr12 | +(56558846..56559546) | 700  | 0.12742 | 11 | 5  | 6  | 0.0909091 | 0.00308495 | MYL6     | SMARCC2   |
| chr12 | +(56572462..56573062) | 600  | 3.08111 | 6  | 4  | 2  | 0.3333333 | 0.067      | MYL6     | SMARCC2   |
| chr12 | +(57000146..57000724) | 578  | 0.29741 | 12 | 4  | 8  | 0.3333333 | 0.00328926 | RBMS2    | BAZ2A     |
| chr12 | +(57397825..57398376) | 551  | 1.46883 | 8  | 3  | 5  | 0.25      | 0.125      | GPR182   | ZBTB39    |
| chr12 | +(57569075..57569933) | 858  | 1.46883 | 14 | 7  | 7  | 0         | 0.99912744 | LRP1     | MIR1228   |
| chr12 | +(57602069..57603346) | 1277 | 0.29741 | 18 | 9  | 9  | 0         | 0.88338488 | MIR1228  | NXPH4     |
| chr12 | +(58009307..58009852) | 545  | 3.08111 | 6  | 2  | 4  | 0.3333333 | 0.067      | ARHGEF25 | SLC26A10  |
| chr12 | +(58021646..58022291) | 645  | 0.06632 | 11 | 5  | 6  | 0.0909091 | 0.00308495 | SLC26A10 | B4GALNT1  |
| chr12 | +(63328197..63328891) | 694  | 0.69993 | 11 | 7  | 4  | 0.2727273 | 0.885      | MIRLET7I | PPM1H     |
| chr12 | +(64823616..64824136) | 520  | 3.08111 | 9  | 4  | 5  | 0.1111111 | 0.008      | XPOT     | TBK1      |
| chr12 | +(64889974..64890664) | 690  | 1.46883 | 10 | 7  | 3  | 0.4       | 0.058      | TBK1     | RASSF3    |
| chr12 | +(65781775..65782475) | 700  | 0.03249 | 12 | 7  | 5  | 0.1666667 | 0.00224163 | MSRB3    | RPSAP52   |
| chr12 | +(69339382..69339938) | 556  | 1.46883 | 8  | 5  | 3  | 0.25      | 0.018      | MDM2     | CPM       |
| chr12 | +(70959897..70960481) | 584  | 3.08111 | 12 | 7  | 5  | 0.1666667 | 0.06144014 | KCNMB4   | PTPRB     |
| chr12 | +(71065937..71066478) | 541  | 3.08111 | 12 | 5  | 7  | 0.1666667 | 0.08373231 | PTPRB    | PTPRR     |
| chr12 | +(71286539..71287069) | 530  | 3.08111 | 9  | 6  | 3  | 0.3333333 | 0.81       | PTPRB    | PTPRR     |
| chr12 | +(72092479..72092983) | 504  | 3.08111 | 8  | 3  | 5  | 0.25      | 0.018      | TMEM19   | RAB21     |

|       |                         |      |         |    |    |    |           |            |           |          |
|-------|-------------------------|------|---------|----|----|----|-----------|------------|-----------|----------|
| chr12 | +(72175446..72175961)   | 515  | 3.08111 | 11 | 5  | 6  | 0.0909091 | 0.00881105 | RAB21     | TBC1D15  |
| chr12 | +(74934754..74935549)   | 795  | 0.06632 | 12 | 5  | 7  | 0.1666667 | 0.00224163 | ATXN7L3B  | KCNC2    |
| chr12 | +(75435989..75436493)   | 504  | 3.08111 | 6  | 2  | 4  | 0.3333333 | 0.067      | ATXN7L3B  | KCNC2    |
| chr12 | +(75714812..75715469)   | 657  | 0.12742 | 17 | 7  | 10 | 0.1764706 | 0.08592868 | KCNC2     | CAPS2    |
| chr12 | +(77222029..77222543)   | 514  | 3.08111 | 8  | 3  | 5  | 0.25      | 0.018      | ZDHHC17   | CSRP2    |
| chr12 | +(77240177..77240877)   | 700  | 0.69993 | 12 | 8  | 4  | 0.3333333 | 0.024      | ZDHHC17   | CSRP2    |
| chr12 | +(77449547..77450052)   | 505  | 3.08111 | 9  | 5  | 4  | 0.1111111 | 0.095      | CSRP2     | E2F7     |
| chr12 | +(78350443..78351143)   | 700  | 0.06632 | 11 | 6  | 5  | 0.0909091 | 0.00308495 | NAV3      | SYT1     |
| chr12 | +(80208916..80209616)   | 700  | 0.12742 | 10 | 4  | 6  | 0.2       | 0.005      | PAWR      | PPP1R12A |
| chr12 | +(80211015..80211536)   | 521  | 1.46883 | 12 | 7  | 5  | 0.1666667 | 0.04407898 | PAWR      | PPP1R12A |
| chr12 | +(82750664..82751170)   | 506  | 0.65817 | 18 | 10 | 8  | 0.1111111 | 0.00642562 | PPFIA2    | CCDC59   |
| chr12 | +(83098959..83099600)   | 641  | 3.08111 | 6  | 2  | 4  | 0.3333333 | 0.067      | TMTC2     | SLC6A15  |
| chr12 | +(83515379..83516532)   | 1153 | 0.06632 | 20 | 11 | 9  | 0.1       | 0.99991528 | TMTC2     | SLC6A15  |
| chr12 | +(86198395..86198988)   | 593  | 0.69993 | 10 | 7  | 3  | 0.4       | 0.058      | ALX1      | RASSF9   |
| chr12 | +(88442844..88443444)   | 600  | 0.42719 | 19 | 13 | 6  | 0.3684211 | 0.00327517 | C12orf29  | CEP290   |
| chr12 | +(88473742..88474321)   | 579  | 0.29741 | 10 | 7  | 3  | 0.4       | 0.008      | C12orf29  | CEP290   |
| chr12 | +(88532737..88533257)   | 520  | 3.08111 | 10 | 7  | 3  | 0.4       | 0.017      | C12orf29  | CEP290   |
| chr12 | +(89894897..89895400)   | 503  | 1.46883 | 12 | 7  | 5  | 0.1666667 | 0.18587565 | DUSP6     | POC1B    |
| chr12 | +(93792819..93793335)   | 516  | 1.46883 | 10 | 4  | 6  | 0.2       | 0.019      | NUDT4P1   | UBE2N    |
| chr12 | +(95365057..95365633)   | 576  | 1.46883 | 10 | 7  | 3  | 0.4       | 0.033      | KRT19P2   | NDUFA12  |
| chr12 | +(95603473..95604051)   | 578  | 3.08111 | 6  | 4  | 2  | 0.3333333 | 0.067      | NR2C1     | FGD6     |
| chr12 | +(97168430..97169113)   | 683  | 3.08111 | 7  | 4  | 3  | 0.1428571 | 0.2        | CDK17     | NEDD1    |
| chr12 | +(97300720..97301525)   | 805  | 1.46883 | 13 | 7  | 6  | 0.0769231 | 0.0013499  | CDK17     | NEDD1    |
| chr12 | +(97469467..97470612)   | 1145 | 1.46883 | 13 | 7  | 6  | 0.0769231 | 0.9986501  | NEDD1     | RMST     |
| chr12 | +(98994720..98995246)   | 526  | 0.69993 | 15 | 8  | 7  | 0.0666667 | 0.00190677 | SNORA53   | IKBIP    |
| chr12 | +(99135045..99135595)   | 550  | 1.46883 | 7  | 3  | 4  | 0.1428571 | 0.029      | APAF1     | ANKS1B   |
| chr12 | +(100566811..100567375) | 564  | 3.08111 | 6  | 2  | 4  | 0.3333333 | 0.067      | UHRF1BP1L | GOLGA2B  |
| chr12 | +(101472733..101473280) | 547  | 1.46883 | 7  | 4  | 3  | 0.1428571 | 0.029      | ANO4      | SLC5A8   |
| chr12 | +(101522713..101523413) | 700  | 0.29741 | 13 | 4  | 9  | 0.3846154 | 0.001      | ANO4      | SLC5A8   |
| chr12 | +(102155315..102155851) | 536  | 3.08111 | 9  | 6  | 3  | 0.3333333 | 0.274      | SYCP3     | GNPTAB   |
| chr12 | +(102313576..102314207) | 631  | 3.08111 | 10 | 5  | 5  | 0         | 0.0081468  | DRAM1     | CCDC53   |
| chr12 | +(104252785..104253308) | 523  | 3.08111 | 6  | 2  | 4  | 0.3333333 | 0.067      | NT5DC3    | GNN      |
| chr12 | +(104496546..104497134) | 588  | 3.08111 | 9  | 3  | 6  | 0.3333333 | 0.048      | HCFC2     | NFYB     |
| chr12 | +(105124130..105124817) | 687  | 1.46883 | 7  | 4  | 3  | 0.1428571 | 0.029      | MIR3922   | SLC41A2  |

|       |                         |      |         |    |    |    |           |            |              |          |
|-------|-------------------------|------|---------|----|----|----|-----------|------------|--------------|----------|
| chr12 | +(105845246..105845890) | 644  | 0.12742 | 10 | 5  | 5  | 0         | 0.00451172 | C12orf75     | NUAK1    |
| chr12 | +(106460080..106460588) | 508  | 3.08111 | 10 | 6  | 4  | 0.2       | 0.005      | C12orf75     | NUAK1    |
| chr12 | +(106760009..106760605) | 596  | 1.46883 | 9  | 3  | 6  | 0.3333333 | 0.012      | POLR3B       | RFX4     |
| chr12 | +(107214673..107216036) | 1363 | 0.69993 | 15 | 5  | 10 | 0.3333333 | 0.9669037  | RIC8B        | C12orf23 |
| chr12 | +(108013558..108014073) | 515  | 3.08111 | 8  | 3  | 5  | 0.25      | 0.714      | BTBD11       | PWP1     |
| chr12 | +(108909917..108910506) | 589  | 3.08111 | 6  | 3  | 3  | 0         | 0.05       | FICD         | SART3    |
| chr12 | +(109109612..109110275) | 663  | 3.08111 | 9  | 6  | 3  | 0.3333333 | 0.988      | SELPLG       | CORO1C   |
| chr12 | +(109132775..109133475) | 700  | 0.06632 | 11 | 6  | 5  | 0.0909091 | 0.00308495 | CORO1C       | SSH1     |
| chr12 | +(109182437..109182938) | 501  | 0.69993 | 13 | 7  | 6  | 0.0769231 | 0.84134475 | CORO1C       | SSH1     |
| chr12 | +(109204345..109205001) | 656  | 0.29741 | 9  | 4  | 5  | 0.1111111 | 0.008      | CORO1C       | SSH1     |
| chr12 | +(109504876..109505546) | 670  | 1.46883 | 10 | 7  | 3  | 0.4       | 0.008      | USP30        | ALKBH2   |
| chr12 | +(109696254..109696938) | 684  | 3.08111 | 6  | 2  | 4  | 0.3333333 | 0.067      | ACACB        | FOXN4    |
| chr12 | +(110243147..110244018) | 871  | 4.2E-05 | 23 | 7  | 16 | 0.3913043 | 9.1405E-05 | MGC14436     | TRPV4    |
| chr12 | +(110290279..110290817) | 538  | 3.08111 | 9  | 5  | 4  | 0.1111111 | 0.056      | TRPV4        | GLTP     |
| chr12 | +(110340472..110340990) | 518  | 0.12742 | 14 | 5  | 9  | 0.2857143 | 0.0013499  | TCHP         | GIT2     |
| chr12 | +(111057359..111058035) | 676  | 3.08111 | 6  | 4  | 2  | 0.3333333 | 0.067      | TCTN1        | HVCN1    |
| chr12 | +(111087535..111088118) | 583  | 1.46883 | 7  | 4  | 3  | 0.1428571 | 0.029      | TCTN1        | HVCN1    |
| chr12 | +(111375767..111376458) | 691  | 1.46883 | 7  | 4  | 3  | 0.1428571 | 0.029      | LOC100131138 | CUX2     |
| chr12 | +(111490568..111491174) | 606  | 1.46883 | 11 | 7  | 4  | 0.2727273 | 0.003      | CUX2         | FAM109A  |
| chr12 | +(111516365..111516930) | 565  | 0.69993 | 8  | 5  | 3  | 0.25      | 0.018      | CUX2         | FAM109A  |
| chr12 | +(111706337..111706877) | 540  | 3.08111 | 6  | 4  | 2  | 0.3333333 | 0.067      | CUX2         | FAM109A  |
| chr12 | +(111714367..111715055) | 688  | 3.08111 | 11 | 5  | 6  | 0.0909091 | 0.00308495 | CUX2         | FAM109A  |
| chr12 | +(111799387..111800493) | 1106 | 0.03249 | 21 | 7  | 14 | 0.3333333 | 0.16605784 | CUX2         | FAM109A  |
| chr12 | +(111926107..111926742) | 635  | 1.46883 | 10 | 3  | 7  | 0.4       | 0.033      | SH2B3        | ATXN2    |
| chr12 | +(112614349..112614971) | 622  | 1.46883 | 11 | 7  | 4  | 0.2727273 | 0.794      | TRAFD1       | C12orf51 |
| chr12 | +(112926054..112926573) | 519  | 3.08111 | 8  | 5  | 3  | 0.25      | 0.018      | PTPN11       | RPH3A    |
| chr12 | +(113541703..113542357) | 654  | 0.12742 | 10 | 5  | 5  | 0         | 0.00451172 | DTX1         | RASAL1   |
| chr12 | +(113616856..113617409) | 553  | 0.12742 | 10 | 5  | 5  | 0         | 0.00451172 | CCDC42B      | DDX54    |
| chr12 | +(113734412..113734999) | 587  | 3.08111 | 9  | 3  | 6  | 0.3333333 | 0.012      | TPCN1        | SLC24A6  |
| chr12 | +(113966282..113966832) | 550  | 0.12742 | 10 | 6  | 4  | 0.2       | 0.005      | LHX5         | RBM19    |
| chr12 | +(114123351..114123991) | 640  | 0.29741 | 9  | 4  | 5  | 0.1111111 | 0.008      | LHX5         | RBM19    |
| chr12 | +(114200060..114200752) | 692  | 0.69993 | 8  | 4  | 4  | 0         | 0.014      | LHX5         | RBM19    |
| chr12 | +(114377235..114378553) | 1318 | 0.69993 | 18 | 10 | 8  | 0.1111111 | 0.99981036 | LHX5         | RBM19    |
| chr12 | +(116446467..116447050) | 583  | 0.12742 | 15 | 8  | 7  | 0.0666667 | 0.17726974 | TBX3         | MED13L   |

|       |                         |      |         |    |    |    |           |            |          |          |
|-------|-------------------------|------|---------|----|----|----|-----------|------------|----------|----------|
| chr12 | +(117465946..117466499) | 553  | 3.08111 | 6  | 4  | 2  | 0.3333333 | 0.067      | FBXW8    | TESC     |
| chr12 | +(117723650..117724198) | 548  | 3.08111 | 9  | 4  | 5  | 0.1111111 | 0.548      | FBXO21   | NOS1     |
| chr12 | +(117797159..117798325) | 1166 | 0.12742 | 19 | 9  | 10 | 0.0526316 | 0.00011928 | FBXO21   | NOS1     |
| chr12 | +(117992823..117993338) | 515  | 3.08111 | 10 | 7  | 3  | 0.4       | 0.058      | NOS1     | KSR2     |
| chr12 | +(119909619..119910335) | 716  | 0.29741 | 17 | 11 | 6  | 0.2941176 | 0.3815123  | CCDC60   | TMEM233  |
| chr12 | +(120222861..120223561) | 700  | 0.00834 | 15 | 9  | 6  | 0.2       | 0.01694743 | PRKAB1   | CIT      |
| chr12 | +(120530067..120531227) | 1160 | 0.29741 | 17 | 10 | 7  | 0.1764706 | 0.00089545 | CCDC64   | RAB35    |
| chr12 | +(120534874..120535430) | 556  | 3.08111 | 9  | 3  | 6  | 0.3333333 | 0.048      | CCDC64   | RAB35    |
| chr12 | +(120549540..120550240) | 700  | 3.08111 | 11 | 6  | 5  | 0.0909091 | 0.00308495 | CCDC64   | RAB35    |
| chr12 | +(120599072..120599577) | 505  | 3.08111 | 8  | 3  | 5  | 0.25      | 0.5        | RAB35    | GCN1L1   |
| chr12 | +(120759641..120760215) | 574  | 3.08111 | 9  | 3  | 6  | 0.3333333 | 0.024      | SIRT4    | PLA2G1B  |
| chr12 | +(120762602..120763105) | 503  | 3.08111 | 7  | 3  | 4  | 0.1428571 | 0.029      | SIRT4    | PLA2G1B  |
| chr12 | +(121435335..121435842) | 507  | 3.08111 | 9  | 4  | 5  | 0.1111111 | 0.143      | HNF1A    | C12orf43 |
| chr12 | +(121470827..121471513) | 686  | 3.08111 | 13 | 7  | 6  | 0.0769231 | 0.01606229 | C12orf43 | OASL     |
| chr12 | +(121947409..121947976) | 567  | 1.46883 | 10 | 7  | 3  | 0.4       | 0.992      | RNF34    | KDM2B    |
| chr12 | +(121968515..121969208) | 693  | 1.46883 | 7  | 3  | 4  | 0.1428571 | 0.029      | RNF34    | KDM2B    |
| chr12 | +(122208331..122208973) | 642  | 1.46883 | 7  | 3  | 4  | 0.1428571 | 0.029      | TMEM120B | RHOF     |
| chr12 | +(122252775..122253371) | 596  | 0.69993 | 9  | 3  | 6  | 0.3333333 | 0.083      | SETD1B   | HPD      |
| chr12 | +(122691409..122692109) | 700  | 0.29741 | 12 | 7  | 5  | 0.1666667 | 0.28488218 | B3GNT4   | DIABLO   |
| chr12 | +(122803660..122804239) | 579  | 1.46883 | 10 | 7  | 3  | 0.4       | 0.008      | VPS33A   | CLIP1    |
| chr12 | +(122861971..122862537) | 566  | 1.46883 | 14 | 9  | 5  | 0.2857143 | 0.02659758 | VPS33A   | CLIP1    |
| chr12 | +(122957794..122958333) | 539  | 0.12742 | 10 | 3  | 7  | 0.4       | 0.008      | CLIP1    | ZCCHC8   |
| chr12 | +(123001525..123002073) | 548  | 0.69993 | 12 | 5  | 7  | 0.1666667 | 0.02117853 | ZCCHC8   | RSRC2    |
| chr12 | +(123006560..123007195) | 635  | 1.46883 | 12 | 6  | 6  | 0         | 0.16833419 | ZCCHC8   | RSRC2    |
| chr12 | +(123035553..123036229) | 676  | 1.46883 | 10 | 3  | 7  | 0.4       | 0.017      | KNTC1    | GPR109A  |
| chr12 | +(123343974..123344623) | 649  | 1.46883 | 10 | 6  | 4  | 0.2       | 0.129      | HIP1R    | VPS37B   |
| chr12 | +(123358513..123359213) | 700  | 0.01356 | 13 | 6  | 7  | 0.0769231 | 0.0013499  | HIP1R    | VPS37B   |
| chr12 | +(123472009..123472709) | 700  | 3.08111 | 10 | 3  | 7  | 0.4       | 0.867      | ARL6IP4  | PITPNM2  |
| chr12 | +(123497062..123497762) | 700  | 0.29741 | 10 | 3  | 7  | 0.4       | 0.258      | ARL6IP4  | PITPNM2  |
| chr12 | +(123685920..123686529) | 609  | 1.46883 | 10 | 7  | 3  | 0.4       | 0.992      | MIR4304  | MPHOSPH9 |
| chr12 | +(123728752..123729321) | 569  | 3.08111 | 6  | 4  | 2  | 0.3333333 | 0.067      | C12orf65 | CDK2AP1  |
| chr12 | +(123950847..123951395) | 548  | 3.08111 | 11 | 6  | 5  | 0.0909091 | 0.97769514 | SNRNP35  | RILPL1   |
| chr12 | +(123968567..123969069) | 502  | 3.08111 | 7  | 3  | 4  | 0.1428571 | 0.029      | SNRNP35  | RILPL1   |
| chr12 | +(124177035..124177538) | 503  | 3.08111 | 8  | 5  | 3  | 0.25      | 0.286      | TCTN2    | ATP6V0A2 |

|       |                         |      |         |    |    |    |           |            |              |           |   |
|-------|-------------------------|------|---------|----|----|----|-----------|------------|--------------|-----------|---|
| chr12 | +(124209419..124210119) | 700  | 0.69993 | 9  | 6  | 3  | 0.3333333 | 0.274      | ATP6V0A2     | DNAH10    |   |
| chr12 | +(124497485..124498185) | 700  | 0.00834 | 18 | 6  | 12 | 0.3333333 | 0.28707454 | ZNF664       | FAM101A   |   |
| chr12 | +(124785626..124786270) | 644  | 0.12742 | 10 | 3  | 7  | 0.4       | 0.008      | FAM101A      | NCOR2     |   |
| chr12 | +(124802436..124803136) | 700  | 1.46883 | 11 | 4  | 7  | 0.2727273 | 0.003      | FAM101A      | NCOR2     |   |
| chr12 | +(124937497..124938020) | 523  | 0.12742 | 10 | 4  | 6  | 0.2       | 0.005      | FAM101A      | NCOR2     |   |
| chr12 | +(124942853..124943469) | 616  | 3.08111 | 11 | 6  | 5  | 0.0909091 | 0.99691505 | FAM101A      | NCOR2     |   |
| chr12 | +(124970651..124971282) | 631  | 0.12742 | 12 | 5  | 7  | 0.1666667 | 0.00224163 | FAM101A      | NCOR2     |   |
| chr12 | +(125038743..125039443) | 700  | 1.46883 | 9  | 4  | 5  | 0.1111111 | 0.008      | FAM101A      | NCOR2     |   |
| chr12 | +(125184232..125184932) | 700  | 0.12742 | 15 | 5  | 10 | 0.3333333 | 0.00109982 | NCOR2        | SCARB1    |   |
| chr12 | +(125291257..125291821) | 564  | 3.08111 | 6  | 4  | 2  | 0.3333333 | 0.067      | NCOR2        | SCARB1    |   |
| chr12 | +(125398678..125399614) | 936  | 0.29741 | 15 | 6  | 9  | 0.2       | 0.00073136 | SCARB1       | UBC       |   |
| chr12 | +(128865907..128866571) | 664  | 3.08111 | 6  | 2  | 4  | 0.3333333 | 0.067      | MIR3612      | SLC15A4   |   |
| chr12 | +(129181338..129182033) | 695  | 3.08111 | 10 | 4  | 6  | 0.2       | 0.005      | MIR3612      | SLC15A4   |   |
| chr12 | +(129396214..129396761) | 547  | 1.46883 | 7  | 3  | 4  | 0.1428571 | 0.029      | GLT1D1       | TMEM132D  |   |
| chr12 | +(129462681..129463300) | 619  | 0.29741 | 9  | 4  | 5  | 0.1111111 | 0.008      | GLT1D1       | TMEM132D  |   |
| chr12 | +(130649959..130650488) | 529  | 3.08111 | 11 | 6  | 5  | 0.0909091 | 0.07206352 | FZD10        | PIWIL1    | v |
| chr12 | +(131363607..131364958) | 1351 | 0.12742 | 16 | 10 | 6  | 0.25      | 0.99943095 | RAN          | GPR133    |   |
| chr12 | +(131436389..131437314) | 925  | 3.08111 | 12 | 6  | 6  | 0         | 0.00197388 | RAN          | GPR133    |   |
| chr12 | +(131550253..131551537) | 1284 | 0.00388 | 23 | 8  | 15 | 0.3043478 | 5.3756E-05 | GPR133       | LOC116437 |   |
| chr12 | +(131914662..131915243) | 581  | 3.08111 | 6  | 3  | 3  | 0         | 0.05       | LOC116437    | SFSWAP    |   |
| chr12 | +(132177391..132178091) | 700  | 0.69993 | 13 | 6  | 7  | 0.0769231 | 0.97724986 | LOC116437    | SFSWAP    |   |
| chr12 | +(132221223..132222051) | 828  | 3.08111 | 12 | 4  | 8  | 0.3333333 | 0.00328926 | SFSWAP       | MMP17     |   |
| chr12 | +(132402886..132403586) | 700  | 0.03249 | 12 | 8  | 4  | 0.3333333 | 0.99671074 | ULK1         | PUS1      |   |
| chr12 | +(132497929..132498596) | 667  | 0.69993 | 11 | 7  | 4  | 0.2727273 | 0.115      | EP400        | SNORA49   |   |
| chr12 | +(132501983..132502518) | 535  | 4.85899 | 14 | 6  | 8  | 0.1428571 | 0.00097289 | EP400        | SNORA49   |   |
| chr12 | +(132592594..132593305) | 711  | 0.03249 | 12 | 6  | 6  | 0         | 0.00197388 | EP400NL      | DDX51     |   |
| chr12 | +(132670868..132672413) | 1545 | 1.46883 | 19 | 7  | 12 | 0.2631579 | 0.99980713 | NOC4L        | GALNT9    |   |
| chr12 | +(132824361..132825034) | 673  | 0.69993 | 8  | 3  | 5  | 0.25      | 0.018      | NOC4L        | GALNT9    |   |
| chr12 | +(132844124..132845057) | 933  | 0.01356 | 24 | 13 | 11 | 0.0833333 | 0.00035037 | NOC4L        | GALNT9    |   |
| chr12 | +(132856746..132857446) | 700  | 0.12742 | 10 | 4  | 6  | 0.2       | 0.005      | NOC4L        | GALNT9    |   |
| chr12 | +(132890862..132891897) | 1035 | 0.03249 | 19 | 7  | 12 | 0.2631579 | 0.99980713 | NOC4L        | GALNT9    |   |
| chr12 | +(132939491..132940321) | 830  | 0.00101 | 17 | 9  | 8  | 0.0588235 | 0.000266   | LOC100130238 | FBRSL1    |   |
| chr12 | +(133013511..133014211) | 700  | 3.08111 | 11 | 6  | 5  | 0.0909091 | 0.00308495 | LOC100130238 | FBRSL1    |   |
| chr12 | +(133114483..133115183) | 700  | 0.06632 | 12 | 4  | 8  | 0.3333333 | 0.00328926 | FBRSL1       | LOC645277 |   |



|       |                         |      |         |    |    |    |           |            |              |          |
|-------|-------------------------|------|---------|----|----|----|-----------|------------|--------------|----------|
| chr12 | +(133280951..133281453) | 502  | 3.08111 | 9  | 4  | 5  | 0.1111111 | 0.008      | PXMP2        | PGAM5    |
| chr12 | +(133315952..133317168) | 1216 | 0.12742 | 16 | 6  | 10 | 0.25      | 0.74240941 | PGAM5        | ANKLE2   |
| chr12 | +(133445998..133446683) | 685  | 1.46883 | 8  | 4  | 4  | 0         | 0.014      | GOLGA3       | CHFR     |
| chr12 | +(133501828..133502355) | 527  | 1.46883 | 8  | 4  | 4  | 0         | 0.171      | CHFR         | ZNF605   |
| chr12 | +(133521951..133522478) | 527  | 0.29741 | 11 | 7  | 4  | 0.2727273 | 0.006      | CHFR         | ZNF605   |
| chr13 | +(19750829..19751381)   | 552  | 2.82415 | 10 | 4  | 6  | 0.2       | 0.129      | PHF2P1       | TUBA3C   |
| chr13 | +(20006470..20007096)   | 626  | 2.82415 | 9  | 6  | 3  | 0.3333333 | 0.048      | LOC100287114 | TPTE2    |
| chr13 | +(20117331..20118020)   | 689  | 2.82415 | 6  | 2  | 4  | 0.3333333 | 0.067      | TPTE2        | MPHOSPH8 |
| chr13 | +(20276984..20277521)   | 537  | 1.26257 | 10 | 3  | 7  | 0.4       | 0.033      | MPHOSPH8     | PSPC1    |
| chr13 | +(20325340..20325992)   | 652  | 0.63564 | 14 | 9  | 5  | 0.2857143 | 0.04779036 | MPHOSPH8     | PSPC1    |
| chr13 | +(20579280..20579783)   | 503  | 2.82415 | 9  | 6  | 3  | 0.3333333 | 0.548      | ZMYM2        | GJA3     |
| chr13 | +(21233627..21234830)   | 1203 | 0.11848 | 19 | 9  | 10 | 0.0526316 | 0.99988072 | IFT88        | IL17D    |
| chr13 | +(21741842..21742432)   | 590  | 0.26487 | 14 | 5  | 9  | 0.2857143 | 0.27425312 | SAP18        | SKA3     |
| chr13 | +(21999353..21999887)   | 534  | 0.63564 | 14 | 6  | 8  | 0.1428571 | 0.15084979 | MRP63        | ZDHHC20  |
| chr13 | +(24436108..24436839)   | 731  | 0.05597 | 12 | 5  | 7  | 0.1666667 | 0.00591469 | TNFRSF19     | MIPEP    |
| chr13 | +(24470799..24471309)   | 510  | 2.82415 | 6  | 3  | 3  | 0         | 0.05       | PCOTH        | C1QTNF9B |
| chr13 | +(24833087..24833709)   | 622  | 2.82415 | 6  | 3  | 3  | 0         | 0.05       | MIR2276      | C1QTNF9  |
| chr13 | +(26548360..26549060)   | 700  | 2.82415 | 10 | 4  | 6  | 0.2       | 0.995      | ATP8A2       | SHISA2   |
| chr13 | +(28014268..28014776)   | 508  | 2.82415 | 6  | 2  | 4  | 0.3333333 | 0.067      | GTF3A        | MTIF3    |
| chr13 | +(30003056..30003566)   | 510  | 2.82415 | 9  | 6  | 3  | 0.3333333 | 0.012      | MTUS2        | SLC7A1   |
| chr13 | +(31175907..31176672)   | 765  | 0.00952 | 13 | 6  | 7  | 0.0769231 | 0.0013499  | HMGB1        | USPL1    |
| chr13 | +(31191559..31192238)   | 679  | 2.82415 | 6  | 4  | 2  | 0.3333333 | 0.067      | HMGB1        | USPL1    |
| chr13 | +(31891360..31892060)   | 700  | 0.26487 | 10 | 3  | 7  | 0.4       | 0.008      | B3GALTL      | RXFP2    |
| chr13 | +(32360533..32361161)   | 628  | 1.26257 | 10 | 7  | 3  | 0.4       | 0.192      | RXFP2        | EEF1DP3  |
| chr13 | +(32913332..32913944)   | 612  | 2.82415 | 11 | 4  | 7  | 0.2727273 | 0.082      | BRCA2        | N4BP2L1  |
| chr13 | +(33016939..33017445)   | 506  | 1.26257 | 8  | 3  | 5  | 0.25      | 0.018      | N4BP2L1      | N4BP2L2  |
| chr13 | +(35740092..35740792)   | 700  | 0.26487 | 13 | 9  | 4  | 0.3846154 | 0.999      | NBEA         | MAB21L1  |
| chr13 | +(37678688..37679325)   | 637  | 0.11968 | 23 | 14 | 9  | 0.2173913 | 0.09293837 | FAM48A       | CSNK1A1L |
| chr13 | +(37679368..37680038)   | 670  | 0.63564 | 9  | 4  | 5  | 0.1111111 | 0.095      | FAM48A       | CSNK1A1L |
| chr13 | +(38166117..38166717)   | 600  | 2.82415 | 10 | 6  | 4  | 0.2       | 0.381      | CSNK1A1L     | POSTN    |
| chr13 | +(40253907..40254509)   | 602  | 0.63564 | 12 | 8  | 4  | 0.3333333 | 0.024      | MIR4305      | FLJ42392 |
| chr13 | +(40794121..40794659)   | 538  | 2.82415 | 6  | 2  | 4  | 0.3333333 | 0.067      | MIR4305      | FLJ42392 |
| chr13 | +(41517825..41518327)   | 502  | 2.82415 | 10 | 4  | 6  | 0.2       | 0.005      | MIR621       | ELF1     |
| chr13 | +(41566773..41567548)   | 775  | 0.05597 | 14 | 6  | 8  | 0.1428571 | 0.01943355 | MIR621       | ELF1     |

|       |                         |      |         |    |    |    |           |            |           |              |
|-------|-------------------------|------|---------|----|----|----|-----------|------------|-----------|--------------|
| chr13 | +(45515109..45515676)   | 567  | 2.82415 | 10 | 4  | 6  | 0.2       | 0.057      | TSC22D1   | NUFIP1       |
| chr13 | +(47466254..47466849)   | 595  | 2.82415 | 10 | 5  | 5  | 0         | 0.00451172 | ESD       | HTR2A        |
| chr13 | +(48523449..48523989)   | 540  | 1.26257 | 8  | 4  | 4  | 0         | 0.014      | HTR2A     | SUCLA2       |
| chr13 | +(49918086..49918621)   | 535  | 1.26257 | 8  | 4  | 4  | 0         | 0.014      | CDADC1    | CAB39L       |
| chr13 | +(50254080..50254742)   | 662  | 2.82415 | 10 | 6  | 4  | 0.2       | 0.005      | ARL11     | EBPL         |
| chr13 | +(52989965..52990521)   | 556  | 1.26257 | 11 | 6  | 5  | 0.0909091 | 0.03394459 | THSD1     | VPS36        |
| chr13 | +(53233163..53233727)   | 564  | 2.82415 | 6  | 2  | 4  | 0.3333333 | 0.067      | SUGT1     | LECT1        |
| chr13 | +(73327651..73328175)   | 524  | 2.82415 | 7  | 3  | 4  | 0.1428571 | 0.029      | C13orf34  | DIS3         |
| chr13 | +(73351250..73351950)   | 700  | 0.63564 | 11 | 4  | 7  | 0.2727273 | 0.003      | C13orf34  | DIS3         |
| chr13 | +(75814182..75814697)   | 515  | 2.20716 | 31 | 16 | 15 | 0.0322581 | 0.00011839 | LOC338864 | CTAGE11P     |
| chr13 | +(79190670..79191177)   | 507  | 2.82415 | 11 | 4  | 7  | 0.2727273 | 0.082      | POU4F1    | RNF219       |
| chr13 | +(79942833..79943502)   | 669  | 1.26257 | 10 | 7  | 3  | 0.4       | 0.192      | RNF219    | RBM26        |
| chr13 | +(96415914..96416444)   | 530  | 0.63564 | 12 | 6  | 6  | 0         | 0.02733197 | DNAJC3    | UGGT2        |
| chr13 | +(98642393..98643093)   | 700  | 0.63564 | 10 | 3  | 7  | 0.4       | 0.033      | IPO5      | FARP1        |
| chr13 | +(99173784..99174386)   | 602  | 2.82415 | 9  | 3  | 6  | 0.3333333 | 0.048      | MIR3170   | STK24        |
| chr13 | +(99195605..99196520)   | 915  | 1.26257 | 16 | 9  | 7  | 0.125     | 0.03198447 | MIR3170   | STK24        |
| chr13 | +(99479630..99480304)   | 674  | 2.82415 | 6  | 4  | 2  | 0.3333333 | 0.067      | SLC15A1   | DOCK9        |
| chr13 | +(101020558..101021139) | 581  | 1.26257 | 9  | 6  | 3  | 0.3333333 | 0.012      | PCCA      | A2LD1        |
| chr13 | +(101199593..101200708) | 1115 | 0.63564 | 16 | 8  | 8  | 0         | 0.99961123 | PCCA      | A2LD1        |
| chr13 | +(102527318..102527843) | 525  | 2.82415 | 6  | 2  | 4  | 0.3333333 | 0.067      | ITGBL1    | FGF14        |
| chr13 | +(103400006..103400508) | 502  | 2.82415 | 13 | 6  | 7  | 0.0769231 | 0.23752526 | C13orf39  | C13orf40     |
| chr13 | +(103400973..103401498) | 525  | 1.26257 | 10 | 4  | 6  | 0.2       | 0.238      | C13orf39  | C13orf40     |
| chr13 | +(103442191..103442891) | 700  | 2.82415 | 9  | 3  | 6  | 0.3333333 | 0.988      | C13orf27  | KDELC1       |
| chr13 | +(107196213..107196733) | 520  | 2.82415 | 12 | 4  | 8  | 0.3333333 | 0.00328926 | EFNB2     | ARGLU1       |
| chr13 | +(109758834..109759534) | 700  | 0.02363 | 12 | 4  | 8  | 0.3333333 | 0.00328926 | MYO16     | IRS2         |
| chr13 | +(109814099..109814965) | 866  | 0.02363 | 12 | 6  | 6  | 0         | 0.00197388 | MYO16     | IRS2         |
| chr13 | +(110855061..110855758) | 697  | 2.82415 | 9  | 6  | 3  | 0.3333333 | 0.988      | IRS2      | COL4A1       |
| chr13 | +(111121297..111121989) | 692  | 0.63564 | 10 | 3  | 7  | 0.4       | 0.008      | COL4A2    | RAB20        |
| chr13 | +(111304575..111305302) | 727  | 0.00266 | 15 | 10 | 5  | 0.3333333 | 0.00109982 | CARKD     | CARS2        |
| chr13 | +(112725595..112726148) | 553  | 2.82415 | 9  | 3  | 6  | 0.3333333 | 0.726      | SOX1      | C13orf28     |
| chr13 | +(113445374..113446074) | 700  | 0.26487 | 9  | 3  | 6  | 0.3333333 | 0.012      | ATP11A    | LOC100289410 |
| chr13 | +(113571079..113571671) | 592  | 0.26487 | 9  | 5  | 4  | 0.1111111 | 0.008      | ATP11A    | LOC100289410 |
| chr13 | +(113592471..113593049) | 578  | 2.82415 | 10 | 6  | 4  | 0.2       | 0.543      | ATP11A    | LOC100289410 |
| chr13 | +(113633626..113634350) | 724  | 7.9E-05 | 23 | 13 | 10 | 0.1304348 | 0.00025736 | MCF2L     | F7           |

|       |                         |      |         |    |    |    |           |            |          |           |
|-------|-------------------------|------|---------|----|----|----|-----------|------------|----------|-----------|
| chr13 | +(114309894..114310549) | 655  | 0.0016  | 16 | 7  | 9  | 0.125     | 0.00042755 | TFDP1    | ATP4B     |
| chr13 | +(114549015..114549587) | 572  | 0.63564 | 8  | 5  | 3  | 0.25      | 0.018      | FAM70B   | GAS6      |
| chr13 | +(114631889..114632550) | 661  | 1.26257 | 7  | 3  | 4  | 0.1428571 | 0.029      | FLJ44054 | RASA3     |
| chr13 | +(114774872..114775443) | 571  | 2.82415 | 6  | 4  | 2  | 0.3333333 | 0.067      | FLJ44054 | RASA3     |
| chr13 | +(114823376..114823915) | 539  | 2.82415 | 8  | 4  | 4  | 0         | 0.443      | FLJ44054 | RASA3     |
| chr13 | +(114891536..114892065) | 529  | 0.63564 | 8  | 4  | 4  | 0         | 0.014      | FLJ44054 | RASA3     |
| chr14 | +(19434041..19434751)   | 710  | 0.00434 | 45 | 16 | 29 | 0.2888889 | 0.00087441 | OR11H12  | POTEG     |
| chr14 | +(19563062..19564069)   | 1007 | 0.2625  | 35 | 22 | 13 | 0.2571429 | 0.04391365 | POTEG    | POTEM     |
| chr14 | +(19640834..19642213)   | 1379 | 0.2625  | 16 | 7  | 9  | 0.125     | 0.99957245 | POTEG    | POTEM     |
| chr14 | +(19806155..19807508)   | 1353 | 0.01375 | 95 | 43 | 52 | 0.0947368 | 0.64851699 | POTEG    | POTEM     |
| chr14 | +(19855054..19855573)   | 519  | 2.74666 | 10 | 7  | 3  | 0.4       | 0.5        | POTEG    | POTEM     |
| chr14 | +(20248689..20249346)   | 657  | 0.43643 | 49 | 24 | 25 | 0.0204082 | 0.18942966 | OR4M1    | OR4N2     |
| chr14 | +(20295529..20296581)   | 1052 | 0.18178 | 46 | 30 | 16 | 0.3043478 | 0.03787697 | OR4M1    | OR4N2     |
| chr14 | +(20302509..20303090)   | 581  | 1.21459 | 7  | 4  | 3  | 0.1428571 | 0.029      | OR4N2    | OR4K2     |
| chr14 | +(20711154..20711662)   | 508  | 2.74666 | 10 | 4  | 6  | 0.2       | 0.457      | OR11H4   | TTC5      |
| chr14 | +(21168212..21168721)   | 509  | 2.74666 | 10 | 4  | 6  | 0.2       | 0.238      | RNASE4   | EDDM3A    |
| chr14 | +(21519311..21520162)   | 851  | 0.00309 | 15 | 7  | 8  | 0.0666667 | 0.00059687 | RNASE7   | RNASE8    |
| chr14 | +(21526030..21526621)   | 591  | 2.74666 | 7  | 4  | 3  | 0.1428571 | 0.029      | RNASE7   | RNASE8    |
| chr14 | +(21569304..21569879)   | 575  | 0.53491 | 8  | 4  | 4  | 0         | 0.014      | ARHGEF40 | ZNF219    |
| chr14 | +(21895833..21896521)   | 688  | 0.2625  | 17 | 11 | 6  | 0.2941176 | 0.0222116  | SUPT16H  | CHD8      |
| chr14 | +(21963265..21963774)   | 509  | 2.74666 | 6  | 2  | 4  | 0.3333333 | 0.067      | TOX4     | METTL3    |
| chr14 | +(21993368..21994026)   | 658  | 0.2625  | 10 | 6  | 4  | 0.2       | 0.129      | METTL3   | SALL2     |
| chr14 | +(23858105..23858616)   | 511  | 2.74666 | 8  | 5  | 3  | 0.25      | 0.018      | CMTM5    | MYH6      |
| chr14 | +(23893132..23893774)   | 642  | 2.74666 | 11 | 6  | 5  | 0.0909091 | 0.70805879 | MIR208A  | MYH7      |
| chr14 | +(23901734..23902235)   | 501  | 2.74666 | 9  | 5  | 4  | 0.1111111 | 0.056      | MIR208A  | MYH7      |
| chr14 | +(24517633..24518749)   | 1116 | 2.52785 | 45 | 19 | 26 | 0.1555556 | 7.8231E-07 | DHRS4L1  | LRRC16B   |
| chr14 | +(24521830..24523091)   | 1261 | 0.2625  | 19 | 8  | 11 | 0.1578947 | 0.02375447 | LRRC16B  | CPNE6     |
| chr14 | +(24569123..24569633)   | 510  | 2.74666 | 7  | 3  | 4  | 0.1428571 | 0.029      | PCK2     | DCAF11    |
| chr14 | +(24792024..24792623)   | 599  | 0.00507 | 15 | 7  | 8  | 0.0666667 | 0.00089011 | LTB4R    | ADCY4     |
| chr14 | +(24869007..24869707)   | 700  | 0.2625  | 9  | 3  | 6  | 0.3333333 | 0.012      | NYNRIN   | CBLN3     |
| chr14 | +(24884882..24885420)   | 538  | 1.21459 | 11 | 7  | 4  | 0.2727273 | 0.979      | NYNRIN   | CBLN3     |
| chr14 | +(25076469..25077120)   | 651  | 2.74666 | 9  | 3  | 6  | 0.3333333 | 0.048      | CTSG     | GZMH      |
| chr14 | +(31597751..31598389)   | 638  | 1.21459 | 10 | 6  | 4  | 0.2       | 0.238      | AP4S1    | HECTD1    |
| chr14 | +(32062260..32062937)   | 677  | 0.2625  | 9  | 5  | 4  | 0.1111111 | 0.008      | NUBPL    | C14orf128 |

|       |                       |      |         |    |    |    |           |            |           |           |   |
|-------|-----------------------|------|---------|----|----|----|-----------|------------|-----------|-----------|---|
| chr14 | +(34155088..34155788) | 700  | 0.07261 | 11 | 7  | 4  | 0.2727273 | 0.003      | NPAS3     | EGLN3     | v |
| chr14 | +(35554793..35555368) | 575  | 0.53491 | 8  | 3  | 5  | 0.25      | 0.018      | FAM177A1  | PPP2R3C   |   |
| chr14 | +(35777843..35778548) | 705  | 0.00176 | 19 | 13 | 6  | 0.3684211 | 0.0003125  | PSMA6     | NFKBIA    |   |
| chr14 | +(35815710..35816665) | 955  | 1.21459 | 16 | 8  | 8  | 0         | 0.07074106 | PSMA6     | NFKBIA    |   |
| chr14 | +(39648407..39648955) | 548  | 0.2625  | 17 | 9  | 8  | 0.0588235 | 0.00103778 | PNN       | MIA2      |   |
| chr14 | +(39649510..39650028) | 518  | 1.21459 | 13 | 6  | 7  | 0.0769231 | 0.84134475 | PNN       | MIA2      |   |
| chr14 | +(39684079..39684676) | 597  | 1.21459 | 10 | 3  | 7  | 0.4       | 0.583      | PNN       | MIA2      |   |
| chr14 | +(39745773..39746571) | 798  | 0.53491 | 18 | 8  | 10 | 0.1111111 | 0.00821967 | CTAGE5    | FBXO33    |   |
| chr14 | +(39817782..39818304) | 522  | 1.21459 | 9  | 3  | 6  | 0.3333333 | 0.19       | CTAGE5    | FBXO33    |   |
| chr14 | +(39855347..39855959) | 612  | 1.21459 | 11 | 7  | 4  | 0.2727273 | 0.082      | CTAGE5    | FBXO33    |   |
| chr14 | +(45506795..45507470) | 675  | 0.07261 | 11 | 4  | 7  | 0.2727273 | 0.003      | FAM179B   | PRPF39    |   |
| chr14 | +(45605141..45605724) | 583  | 1.21459 | 12 | 5  | 7  | 0.1666667 | 0.06144014 | FANCM     | C14orf106 |   |
| chr14 | +(45654066..45654643) | 577  | 2.74666 | 11 | 5  | 6  | 0.0909091 | 0.02230486 | FANCM     | C14orf106 |   |
| chr14 | +(45674944..45675568) | 624  | 2.74666 | 9  | 4  | 5  | 0.1111111 | 0.032      | FANCM     | C14orf106 |   |
| chr14 | +(45693386..45694067) | 681  | 0.2625  | 14 | 6  | 8  | 0.1428571 | 0.01006838 | FANCM     | C14orf106 |   |
| chr14 | +(50121332..50121864) | 532  | 2.74666 | 9  | 6  | 3  | 0.3333333 | 0.274      | C14orf104 | POLE2     |   |
| chr14 | +(50154740..50155966) | 1226 | 0.53491 | 14 | 8  | 6  | 0.1428571 | 0.99902711 | C14orf104 | POLE2     |   |
| chr14 | +(50192269..50192875) | 606  | 2.74666 | 9  | 6  | 3  | 0.3333333 | 0.274      | KLHDC1    | KLHDC2    |   |
| chr14 | +(50251078..50251586) | 508  | 1.21459 | 10 | 6  | 4  | 0.2       | 0.005      | KLHDC2    | SDCCAG1   |   |
| chr14 | +(50294571..50295222) | 651  | 0.01043 | 23 | 9  | 14 | 0.2173913 | 0.00278788 | KLHDC2    | SDCCAG1   |   |
| chr14 | +(50363102..50363647) | 545  | 0.53491 | 11 | 6  | 5  | 0.0909091 | 0.03394459 | ARF6      | C14orf182 |   |
| chr14 | +(50612146..50612749) | 603  | 0.12133 | 15 | 9  | 6  | 0.2       | 0.03854994 | C14orf138 | SOS2      |   |
| chr14 | +(50626322..50626830) | 508  | 2.74666 | 11 | 5  | 6  | 0.0909091 | 0.10062131 | C14orf138 | SOS2      |   |
| chr14 | +(51131495..51132517) | 1022 | 0.02438 | 45 | 24 | 21 | 0.0666667 | 0.02030103 | ATL1      | SAV1      |   |
| chr14 | +(51224545..51225054) | 509  | 2.74666 | 8  | 3  | 5  | 0.25      | 0.036      | SAV1      | NIN       |   |
| chr14 | +(51382149..51382703) | 554  | 0.07261 | 12 | 4  | 8  | 0.3333333 | 0.00328926 | ABHD12B   | PYGL      |   |
| chr14 | +(51560400..51561511) | 1111 | 1.21459 | 15 | 9  | 6  | 0.2       | 0.00666417 | PYGL      | TRIM9     |   |
| chr14 | +(51713690..51714214) | 524  | 2.74666 | 8  | 5  | 3  | 0.25      | 0.018      | TMX1      | FRMD6     |   |
| chr14 | +(53187636..53188145) | 509  | 1.21459 | 8  | 4  | 4  | 0         | 0.014      | PSMC6     | STYX      |   |
| chr14 | +(55510282..55511615) | 1333 | 0.53491 | 25 | 16 | 9  | 0.28      | 0.000224   | SOCS4     | MAPK1IP1L |   |
| chr14 | +(55641867..55642498) | 631  | 2.74666 | 10 | 6  | 4  | 0.2       | 0.057      | LGALS3    | DLGAP5    |   |
| chr14 | +(58478525..58479125) | 600  | 2.74666 | 10 | 4  | 6  | 0.2       | 0.033      | SLC35F4   | C14orf37  |   |
| chr14 | +(58770084..58770684) | 600  | 2.74666 | 9  | 6  | 3  | 0.3333333 | 0.548      | ARID4A    | TOMM20L   |   |
| chr14 | +(58833449..58834150) | 701  | 0.2625  | 17 | 8  | 9  | 0.0588235 | 0.06182886 | ARID4A    | TOMM20L   |   |

|       |                       |      |         |    |    |    |           |            |           |           |
|-------|-----------------------|------|---------|----|----|----|-----------|------------|-----------|-----------|
| chr14 | +(59954292..59954954) | 662  | 1.21459 | 12 | 7  | 5  | 0.1666667 | 0.00591469 | JKAMP     | C14orf38  |
| chr14 | +(60584948..60585494) | 546  | 0.53491 | 14 | 6  | 8  | 0.1428571 | 0.00097289 | C14orf135 | DHRS7     |
| chr14 | +(61234038..61234634) | 596  | 1.21459 | 7  | 4  | 3  | 0.1428571 | 0.029      | MNAT1     | TRMT5     |
| chr14 | +(61449153..61449685) | 532  | 1.21459 | 10 | 6  | 4  | 0.2       | 0.057      | SLC38A6   | TMEM30B   |
| chr14 | +(61512591..61513291) | 700  | 0.2625  | 11 | 7  | 4  | 0.2727273 | 0.003      | SLC38A6   | TMEM30B   |
| chr14 | +(63733444..63733953) | 509  | 1.21459 | 7  | 4  | 3  | 0.1428571 | 0.029      | RHOJ      | GPHB5     |
| chr14 | +(63784294..63784851) | 557  | 1.21459 | 9  | 3  | 6  | 0.3333333 | 0.274      | RHOJ      | GPHB5     |
| chr14 | +(64613932..64614629) | 697  | 2.74666 | 9  | 6  | 3  | 0.3333333 | 0.012      | SYNE2     | ESR2      |
| chr14 | +(65047036..65048120) | 1084 | 0.53491 | 16 | 8  | 8  | 0         | 0.00038877 | C14orf50  | PLEKHG3   |
| chr14 | +(65193652..65194871) | 1219 | 0.53491 | 14 | 6  | 8  | 0.1428571 | 0.00097289 | PLEKHG3   | SPTB      |
| chr14 | +(65550633..65551184) | 551  | 1.21459 | 8  | 4  | 4  | 0         | 0.014      | FNTB      | MAX       |
| chr14 | +(65704719..65705353) | 634  | 0.53491 | 8  | 5  | 3  | 0.25      | 0.018      | MAX       | LOC645431 |
| chr14 | +(67671096..67671724) | 628  | 0.53491 | 11 | 7  | 4  | 0.2727273 | 0.206      | FAM71D    | MPP5      |
| chr14 | +(68028399..68029037) | 638  | 0.53491 | 15 | 9  | 6  | 0.2       | 0.63816319 | PLEKHH1   | PIGH      |
| chr14 | +(68035723..68036282) | 559  | 0.01043 | 13 | 8  | 5  | 0.2307692 | 0.0017074  | PLEKHH1   | PIGH      |
| chr14 | +(68252473..68253047) | 574  | 0.12133 | 10 | 6  | 4  | 0.2       | 0.005      | RDH12     | ZFYVE26   |
| chr14 | +(68582538..68583058) | 520  | 2.54189 | 27 | 16 | 11 | 0.1851852 | 0.16183909 | RAD51L1   | ZFP36L1   |
| chr14 | +(69144691..69145391) | 700  | 0.07261 | 12 | 7  | 5  | 0.1666667 | 0.00224163 | RAD51L1   | ZFP36L1   |
| chr14 | +(69560875..69561403) | 528  | 0.53491 | 8  | 3  | 5  | 0.25      | 0.018      | ACTN1     | DCAF5     |
| chr14 | +(69792416..69793223) | 807  | 0.00309 | 16 | 8  | 8  | 0         | 0.00585934 | GALNTL1   | ERH       |
| chr14 | +(70454358..70454917) | 559  | 2.74666 | 6  | 2  | 4  | 0.3333333 | 0.067      | SMOC1     | SLC8A3    |
| chr14 | +(71269441..71269950) | 509  | 0.2625  | 13 | 8  | 5  | 0.2307692 | 0.0017074  | TTC9      | MAP3K9    |
| chr14 | +(71500602..71501165) | 563  | 2.74666 | 9  | 6  | 3  | 0.3333333 | 0.083      | PCNX      | SNORD56B  |
| chr14 | +(71631734..71632255) | 521  | 1.21459 | 10 | 3  | 7  | 0.4       | 0.992      | PCNX      | SNORD56B  |
| chr14 | +(71648013..71648673) | 660  | 2.74666 | 6  | 2  | 4  | 0.3333333 | 0.067      | PCNX      | SNORD56B  |
| chr14 | +(71850184..71850806) | 622  | 2.74666 | 6  | 4  | 2  | 0.3333333 | 0.067      | PCNX      | SNORD56B  |
| chr14 | +(72944668..72945215) | 547  | 0.53491 | 8  | 5  | 3  | 0.25      | 0.018      | RGS6      | DPF3      |
| chr14 | +(73075738..73076438) | 700  | 0.07261 | 11 | 4  | 7  | 0.2727273 | 0.003      | RGS6      | DPF3      |
| chr14 | +(73268709..73269296) | 587  | 0.2625  | 9  | 4  | 5  | 0.1111111 | 0.008      | RGS6      | DPF3      |
| chr14 | +(73366454..73367028) | 574  | 0.2625  | 9  | 5  | 4  | 0.1111111 | 0.008      | DPF3      | DCAF4     |
| chr14 | +(73578763..73579350) | 587  | 2.74666 | 10 | 6  | 4  | 0.2       | 0.176      | RBM25     | PSEN1     |
| chr14 | +(73950360..73950938) | 578  | 0.53491 | 8  | 3  | 5  | 0.25      | 0.018      | NUMB      | HEATR4    |
| chr14 | +(75078842..75079473) | 631  | 0.2625  | 9  | 4  | 5  | 0.1111111 | 0.008      | ISCA2     | LTBP2     |
| chr14 | +(75190067..75190658) | 591  | 2.74666 | 10 | 3  | 7  | 0.4       | 0.583      | FCF1      | YLPM1     |

|       |                       |      |         |    |    |    |           |            |           |           |
|-------|-----------------------|------|---------|----|----|----|-----------|------------|-----------|-----------|
| chr14 | +(75265950..75266472) | 522  | 2.74666 | 11 | 4  | 7  | 0.2727273 | 0.676      | YLPM1     | PROX2     |
| chr14 | +(75515181..75515758) | 577  | 0.53491 | 14 | 8  | 6  | 0.1428571 | 0.15084979 | EIF2B2    | MLH3      |
| chr14 | +(75989946..75990462) | 516  | 0.53491 | 8  | 4  | 4  | 0         | 0.014      | BATF      | FLVCR2    |
| chr14 | +(76965909..76966609) | 700  | 0.2625  | 11 | 4  | 7  | 0.2727273 | 0.006      | ESRRB     | VASH1     |
| chr14 | +(77120905..77121605) | 700  | 0.53491 | 12 | 8  | 4  | 0.3333333 | 0.99671074 | ESRRB     | VASH1     |
| chr14 | +(77246837..77247452) | 615  | 0.2625  | 14 | 7  | 7  | 0         | 0.91014375 | VASH1     | ANGEL1    |
| chr14 | +(77247561..77248145) | 584  | 1.21459 | 7  | 4  | 3  | 0.1428571 | 0.029      | VASH1     | ANGEL1    |
| chr14 | +(77687805..77688397) | 592  | 0.2625  | 13 | 9  | 4  | 0.3846154 | 0.001      | TMEM63C   | NGB       |
| chr14 | +(77722793..77723357) | 564  | 2.74666 | 6  | 2  | 4  | 0.3333333 | 0.067      | TMEM63C   | NGB       |
| chr14 | +(78397842..78398418) | 576  | 2.74666 | 6  | 3  | 3  | 0         | 0.05       | ADCK1     | NRXN3     |
| chr14 | +(79075104..79075796) | 692  | 2.74666 | 11 | 6  | 5  | 0.0909091 | 0.99691505 | NRXN3     | DIO2      |
| chr14 | +(81743165..81743675) | 510  | 2.74666 | 7  | 4  | 3  | 0.1428571 | 0.029      | SNORA79   | STON2     |
| chr14 | +(85997547..85998247) | 700  | 0.07261 | 14 | 9  | 5  | 0.2857143 | 0.15865525 | FLRT2     | GALC      |
| chr14 | +(86120996..86121782) | 786  | 1.3E-05 | 22 | 13 | 9  | 0.1818182 | 4.6818E-05 | FLRT2     | GALC      |
| chr14 | +(86856665..86857327) | 662  | 2.74666 | 9  | 6  | 3  | 0.3333333 | 0.988      | FLRT2     | GALC      |
| chr14 | +(90754207..90754892) | 685  | 0.2625  | 10 | 6  | 4  | 0.2       | 0.019      | PSMC1     | C14orf102 |
| chr14 | +(90839659..90841005) | 1346 | 0.12133 | 18 | 8  | 10 | 0.1111111 | 0.99981036 | C14orf102 | CALM1     |
| chr14 | +(91000554..91001088) | 534  | 0.07261 | 11 | 6  | 5  | 0.0909091 | 0.00308495 | LOC400238 | TTC7B     |
| chr14 | +(91018610..91019310) | 700  | 0.0305  | 20 | 11 | 9  | 0.1       | 0.90816507 | LOC400238 | TTC7B     |
| chr14 | +(91019752..91020341) | 589  | 0.53491 | 8  | 4  | 4  | 0         | 0.014      | LOC400238 | TTC7B     |
| chr14 | +(91043786..91044319) | 533  | 2.74666 | 6  | 4  | 2  | 0.3333333 | 0.067      | LOC400238 | TTC7B     |
| chr14 | +(91404655..91405195) | 540  | 1.21459 | 7  | 3  | 4  | 0.1428571 | 0.029      | TTC7B     | RPS6KA5   |
| chr14 | +(91759506..91760111) | 605  | 0.2625  | 10 | 5  | 5  | 0         | 0.00451172 | GPR68     | CCDC88C   |
| chr14 | +(91836792..91837435) | 643  | 0.53491 | 8  | 5  | 3  | 0.25      | 0.018      | GPR68     | CCDC88C   |
| chr14 | +(91928254..91928794) | 540  | 2.74666 | 8  | 4  | 4  | 0         | 0.014      | CCDC88C   | SMEK1     |
| chr14 | +(91931402..91932009) | 607  | 2.74666 | 6  | 4  | 2  | 0.3333333 | 0.067      | CCDC88C   | SMEK1     |
| chr14 | +(92493289..92494151) | 862  | 8E-06   | 43 | 27 | 16 | 0.255814  | 1.6734E-06 | FBLN5     | TRIP11    |
| chr14 | +(92604300..92605093) | 793  | 0.0305  | 20 | 11 | 9  | 0.1       | 0.00438241 | CPSF2     | SLC24A4   |
| chr14 | +(92777415..92778079) | 664  | 0.53491 | 8  | 3  | 5  | 0.25      | 0.018      | CPSF2     | SLC24A4   |
| chr14 | +(93081389..93082089) | 700  | 0.12133 | 10 | 7  | 3  | 0.4       | 0.008      | RIN3      | LGMN      |
| chr14 | +(93177758..93178265) | 507  | 2.74666 | 8  | 3  | 5  | 0.25      | 0.018      | RIN3      | LGMN      |
| chr14 | +(93179849..93180377) | 528  | 2.74666 | 7  | 3  | 4  | 0.1428571 | 0.2        | RIN3      | LGMN      |
| chr14 | +(93460542..93461243) | 701  | 0.00507 | 14 | 9  | 5  | 0.2857143 | 0.0013499  | CHGA      | ITPK1     |
| chr14 | +(93540103..93540812) | 709  | 0.0305  | 15 | 8  | 7  | 0.0666667 | 0.00059687 | CHGA      | ITPK1     |

|       |                         |      |         |    |    |    |           |            |           |            |
|-------|-------------------------|------|---------|----|----|----|-----------|------------|-----------|------------|
| chr14 | +(93753105..93753800)   | 695  | 1.21459 | 10 | 7  | 3  | 0.4       | 0.992      | UBR7      | BTBD7      |
| chr14 | +(94394189..94394696)   | 507  | 1.21459 | 11 | 7  | 4  | 0.2727273 | 0.536      | FAM181A   | ASB2       |
| chr14 | +(94517312..94517841)   | 529  | 2.74666 | 10 | 6  | 4  | 0.2       | 0.543      | OTUB2     | DDX24      |
| chr14 | +(94567899..94568599)   | 700  | 0.53491 | 9  | 5  | 4  | 0.1111111 | 0.008      | IFI27L1   | IFI27      |
| chr14 | +(94593933..94594741)   | 808  | 1.21459 | 15 | 8  | 7  | 0.0666667 | 0.00273928 | IFI27     | IFI27L2    |
| chr14 | +(94708307..94708863)   | 556  | 1.21459 | 10 | 4  | 6  | 0.2       | 0.033      | PPP4R4    | SERPINA10  |
| chr14 | +(94731753..94732259)   | 506  | 2.74666 | 9  | 5  | 4  | 0.1111111 | 0.032      | PPP4R4    | SERPINA10  |
| chr14 | +(95760918..95761522)   | 604  | 0.2625  | 9  | 5  | 4  | 0.1111111 | 0.008      | FLJ45244  | CLMN       |
| chr14 | +(95864707..95865293)   | 586  | 2.74666 | 10 | 5  | 5  | 0         | 0.00451172 | CLMN      | C14orf139  |
| chr14 | +(96341048..96342208)   | 1160 | 0.53491 | 14 | 6  | 8  | 0.1428571 | 0.00097289 | TCL1A     | C14orf132  |
| chr14 | +(96509363..96511219)   | 1856 | 0.53491 | 20 | 14 | 6  | 0.4       | 0.68965464 | C14orf132 | BDKRB2     |
| chr14 | +(99504614..99505314)   | 700  | 0.12133 | 10 | 3  | 7  | 0.4       | 0.008      | C14orf177 | BCL11B     |
| chr14 | +(99590699..99591411)   | 712  | 0.01043 | 13 | 7  | 6  | 0.0769231 | 0.0013499  | C14orf177 | BCL11B     |
| chr14 | +(99696986..99697555)   | 569  | 1.21459 | 7  | 4  | 3  | 0.1428571 | 0.029      | C14orf177 | BCL11B     |
| chr14 | +(99989752..99990352)   | 600  | 1.21459 | 7  | 4  | 3  | 0.1428571 | 0.029      | CCNK      | CCDC85C    |
| chr14 | +(100047489..100048153) | 664  | 0.2625  | 9  | 4  | 5  | 0.1111111 | 0.008      | CCNK      | CCDC85C    |
| chr14 | +(101029733..101030642) | 909  | 0.2625  | 15 | 9  | 6  | 0.2       | 0.00073136 | WDR25     | BEGAIN     |
| chr14 | +(101041697..101042338) | 641  | 2.74666 | 6  | 2  | 4  | 0.3333333 | 0.067      | BEGAIN    | C14orf70   |
| chr14 | +(101096338..101097302) | 964  | 1.21459 | 13 | 6  | 7  | 0.0769231 | 0.0013499  | BEGAIN    | C14orf70   |
| chr14 | +(101130534..101131075) | 541  | 2.74666 | 6  | 4  | 2  | 0.3333333 | 0.067      | C14orf70  | DLK1       |
| chr14 | +(101370668..101371553) | 885  | 0.53491 | 17 | 7  | 10 | 0.1764706 | 0.02021199 | MEG8      | SNORD113-1 |
| chr14 | +(102284994..102285532) | 538  | 1.21459 | 10 | 3  | 7  | 0.4       | 0.008      | PPP2R5C   | DYNC1H1    |
| chr14 | +(102468821..102469355) | 534  | 2.74666 | 8  | 5  | 3  | 0.25      | 0.018      | DYNC1H1   | HSP90AA1   |
| chr14 | +(102751415..102751955) | 540  | 2.74666 | 6  | 4  | 2  | 0.3333333 | 0.067      | WDR20     | RAGE       |
| chr14 | +(103218990..103219916) | 926  | 0.53491 | 14 | 6  | 8  | 0.1428571 | 0.00097289 | RCOR1     | TRAF3      |
| chr14 | +(103262087..103262743) | 656  | 1.21459 | 12 | 5  | 7  | 0.1666667 | 0.99775837 | TRAF3     | AMN        |
| chr14 | +(103338090..103338601) | 511  | 2.74666 | 6  | 2  | 4  | 0.3333333 | 0.067      | TRAF3     | AMN        |
| chr14 | +(103342585..103343112) | 527  | 2.74666 | 7  | 4  | 3  | 0.1428571 | 0.029      | TRAF3     | AMN        |
| chr14 | +(103399939..103400515) | 576  | 0.12133 | 10 | 5  | 5  | 0         | 0.00451172 | AMN       | CDC42BPB   |
| chr14 | +(103915143..103915752) | 609  | 2.74666 | 9  | 6  | 3  | 0.3333333 | 0.19       | MARK3     | CKB        |
| chr14 | +(103966831..103967505) | 674  | 2.74666 | 6  | 4  | 2  | 0.3333333 | 0.067      | MARK3     | CKB        |
| chr14 | +(103998896..103999447) | 551  | 2.74666 | 6  | 2  | 4  | 0.3333333 | 0.067      | TRMT61A   | BAG5       |
| chr14 | +(104010027..104010579) | 552  | 1.21459 | 8  | 5  | 3  | 0.25      | 0.018      | TRMT61A   | BAG5       |
| chr14 | +(104178640..104179896) | 1256 | 0.53491 | 16 | 6  | 10 | 0.25      | 0.01502979 | KLC1      | XRCC3      |

|       |                         |      |         |    |    |    |           |            |            |            |
|-------|-------------------------|------|---------|----|----|----|-----------|------------|------------|------------|
| chr14 | +(104228948..104229597) | 649  | 2.74666 | 9  | 6  | 3  | 0.3333333 | 0.012      | ZFYVE21    | PPP1R13B   |
| chr14 | +(104610408..104611108) | 700  | 2.74666 | 10 | 6  | 4  | 0.2       | 0.005      | KIF26A     | C14orf180  |
| chr14 | +(104735769..104736305) | 536  | 0.53491 | 8  | 3  | 5  | 0.25      | 0.018      | KIF26A     | C14orf180  |
| chr14 | +(104755110..104756084) | 974  | 2.74666 | 12 | 8  | 4  | 0.3333333 | 0.99671074 | KIF26A     | C14orf180  |
| chr14 | +(104983994..104984514) | 520  | 1.21459 | 7  | 3  | 4  | 0.1428571 | 0.029      | KIF26A     | C14orf180  |
| chr14 | +(104988228..104988739) | 511  | 0.53491 | 8  | 5  | 3  | 0.25      | 0.018      | KIF26A     | C14orf180  |
| chr14 | +(105052549..105053070) | 521  | 2.74666 | 8  | 3  | 5  | 0.25      | 0.125      | C14orf180  | TMEM179    |
| chr14 | +(105256092..105256635) | 543  | 2.74666 | 6  | 2  | 4  | 0.3333333 | 0.067      | SIVA1      | AKT1       |
| chr14 | +(105410811..105411415) | 604  | 0.53491 | 15 | 9  | 6  | 0.2       | 0.11929642 | PLD4       | AHNAK2     |
| chr14 | +(105415011..105415666) | 655  | 1.21459 | 10 | 7  | 3  | 0.4       | 0.008      | PLD4       | AHNAK2     |
| chr14 | +(105441150..105441850) | 700  | 1.21459 | 10 | 3  | 7  | 0.4       | 0.5        | PLD4       | AHNAK2     |
| chr14 | +(105527107..105527733) | 626  | 0.00507 | 17 | 6  | 11 | 0.2941176 | 0.00045556 | CDCA4      | GPR132     |
| chr14 | +(105648392..105648993) | 601  | 0.53491 | 8  | 4  | 4  | 0         | 0.014      | NUDT14     | BRF1       |
| chr14 | +(105682146..105683652) | 1506 | 0.2625  | 24 | 14 | 10 | 0.1666667 | 4.3705E-05 | NUDT14     | BRF1       |
| chr14 | +(105911100..105911800) | 700  | 0.00507 | 14 | 8  | 6  | 0.1428571 | 0.00097289 | MTA1       | CRIP2      |
| chr14 | +(106007254..106007954) | 700  | 1.21459 | 9  | 6  | 3  | 0.3333333 | 0.012      | TMEM121    | KIAA0125   |
| chr14 | +(106090788..106091343) | 555  | 2.74666 | 11 | 5  | 6  | 0.0909091 | 0.18065522 | TMEM121    | KIAA0125   |
| chr14 | +(106107945..106108458) | 513  | 2.74666 | 10 | 6  | 4  | 0.2       | 0.005      | TMEM121    | KIAA0125   |
| chr14 | +(106132955..106133553) | 598  | 1.21459 | 19 | 11 | 8  | 0.1578947 | 0.04932381 | TMEM121    | KIAA0125   |
| chr14 | +(106174527..106175035) | 508  | 2.74666 | 7  | 4  | 3  | 0.1428571 | 0.029      | TMEM121    | KIAA0125   |
| chr14 | +(106183509..106184127) | 618  | 1.21459 | 7  | 4  | 3  | 0.1428571 | 0.029      | TMEM121    | KIAA0125   |
| chr14 | +(106388002..106388684) | 682  | 1.21459 | 10 | 3  | 7  | 0.4       | 0.017      | KIAA0125   | ADAM6      |
| chr15 | +(22051915..22052417)   | 502  | 4.78021 | 23 | 16 | 7  | 0.3913043 | 0.74798207 | CXADRP2    | POTEB_dup2 |
| chr15 | +(22061962..22062939)   | 977  | 0.11731 | 55 | 27 | 28 | 0.0181818 | 0.02541208 | CXADRP2    | POTEB_dup2 |
| chr15 | +(22063313..22064052)   | 739  | 0.01663 | 79 | 45 | 34 | 0.1392405 | 9.8773E-09 | CXADRP2    | POTEB_dup2 |
| chr15 | +(22077296..22077943)   | 647  | 0.10462 | 56 | 26 | 30 | 0.0714286 | 0.01635013 | CXADRP2    | POTEB_dup2 |
| chr15 | +(22082119..22082697)   | 578  | 2.9207  | 33 | 12 | 21 | 0.2727273 | 0.00394071 | CXADRP2    | POTEB_dup2 |
| chr15 | +(22118287..22118789)   | 502  | 2.38943 | 8  | 4  | 4  | 0         | 0.014      | POTEB_dup2 | NF1P1_dup2 |
| chr15 | +(22958023..22958851)   | 828  | 0.47311 | 14 | 6  | 8  | 0.1428571 | 0.00097289 | CYFIP1     | NIPA2      |
| chr15 | +(23014250..23014782)   | 532  | 2.38943 | 6  | 4  | 2  | 0.3333333 | 0.067      | CYFIP1     | NIPA2      |
| chr15 | +(23075107..23075682)   | 575  | 2.38943 | 6  | 3  | 3  | 0         | 0.05       | NIPA2      | NIPA1      |
| chr15 | +(23287960..23288478)   | 518  | 2.38943 | 10 | 6  | 4  | 0.2       | 0.381      | GOLGA8IP   | HERC2P2    |
| chr15 | +(23309927..23310593)   | 666  | 0.01044 | 24 | 16 | 8  | 0.3333333 | 0.11033568 | GOLGA8IP   | HERC2P2    |
| chr15 | +(23330319..23330823)   | 504  | 2.38943 | 17 | 7  | 10 | 0.1764706 | 0.38484897 | GOLGA8IP   | HERC2P2    |



|       |                       |      |         |    |    |    |           |            |             |              |   |
|-------|-----------------------|------|---------|----|----|----|-----------|------------|-------------|--------------|---|
| chr15 | +(23466593..23467171) | 578  | 1.13138 | 7  | 3  | 4  | 0.1428571 | 0.029      | GOLGA8E     | MKRN3        |   |
| chr15 | +(23512395..23513079) | 684  | 1.87258 | 21 | 14 | 7  | 0.3333333 | 0.00012828 | GOLGA8E     | MKRN3        |   |
| chr15 | +(23572839..23573376) | 537  | 2.38943 | 15 | 10 | 5  | 0.3333333 | 0.59675203 | GOLGA8E     | MKRN3        |   |
| chr15 | +(23602459..23602989) | 530  | 1.13138 | 13 | 8  | 5  | 0.2307692 | 0.0394913  | GOLGA8E     | MKRN3        |   |
| chr15 | +(23812407..23812932) | 525  | 2.38943 | 10 | 3  | 7  | 0.4       | 0.033      | MKRN3       | MAGEL2       |   |
| chr15 | +(25926432..25927185) | 753  | 0.00177 | 16 | 11 | 5  | 0.375     | 0.0009184  | UBE3A       | ATP10A       |   |
| chr15 | +(27283506..27284123) | 617  | 1.13138 | 7  | 3  | 4  | 0.1428571 | 0.029      | GABRG3      | OCA2         | v |
| chr15 | +(27998816..27999367) | 551  | 2.38943 | 9  | 3  | 6  | 0.3333333 | 0.012      | GABRG3      | OCA2         | v |
| chr15 | +(28107912..28108611) | 699  | 0.23588 | 10 | 7  | 3  | 0.4       | 0.058      | GABRG3      | OCA2         | v |
| chr15 | +(28440975..28441524) | 549  | 0.47311 | 15 | 7  | 8  | 0.0666667 | 0.01031878 | OCA2        | HERC2        |   |
| chr15 | +(28446299..28446916) | 617  | 1.13138 | 13 | 8  | 5  | 0.2307692 | 0.00641335 | OCA2        | HERC2        |   |
| chr15 | +(28478217..28478904) | 687  | 0.6732  | 32 | 10 | 22 | 0.375     | 0.11129435 | OCA2        | HERC2        |   |
| chr15 | +(28483138..28484038) | 900  | 2.38943 | 17 | 8  | 9  | 0.0588235 | 0.01344276 | OCA2        | HERC2        |   |
| chr15 | +(28505592..28506292) | 700  | 1.13138 | 10 | 4  | 6  | 0.2       | 0.005      | OCA2        | HERC2        |   |
| chr15 | +(28596167..28596672) | 505  | 3.68894 | 34 | 18 | 16 | 0.0588235 | 0.01361483 | HERC2       | GOLGA8F_dup1 |   |
| chr15 | +(29129994..29130582) | 588  | 0.47311 | 8  | 4  | 4  | 0         | 0.014      | LOC646278   | APBA2        |   |
| chr15 | +(29139954..29140652) | 698  | 2.38943 | 9  | 6  | 3  | 0.3333333 | 0.988      | LOC646278   | APBA2        |   |
| chr15 | +(29283293..29284029) | 736  | 0.01044 | 15 | 8  | 7  | 0.0666667 | 0.00059687 | APBA2       | FAM189A1     |   |
| chr15 | +(29526092..29526622) | 530  | 2.38943 | 9  | 5  | 4  | 0.1111111 | 0.056      | APBA2       | FAM189A1     |   |
| chr15 | +(29671625..29672325) | 700  | 0.47311 | 10 | 3  | 7  | 0.4       | 0.017      | APBA2       | FAM189A1     |   |
| chr15 | +(30874740..30875435) | 695  | 0.1169  | 38 | 18 | 20 | 0.0526316 | 7.1114E-08 | FAM7A2_dup1 | ARHGAP11B    |   |
| chr15 | +(31266448..31266954) | 506  | 1.13138 | 10 | 3  | 7  | 0.4       | 0.008      | FAN1        | MTMR10       |   |
| chr15 | +(31342342..31342893) | 551  | 1.13138 | 13 | 9  | 4  | 0.3846154 | 0.47       | MTMR10      | TRPM1        |   |
| chr15 | +(31557552..31558092) | 540  | 1.13138 | 9  | 4  | 5  | 0.1111111 | 0.008      | MIR211      | KLF13        |   |
| chr15 | +(31664698..31665291) | 593  | 0.47311 | 8  | 4  | 4  | 0         | 0.014      | KLF13       | OTUD7A       |   |
| chr15 | +(31745482..31746182) | 700  | 1.13138 | 14 | 7  | 7  | 0         | 0.32736042 | KLF13       | OTUD7A       |   |
| chr15 | +(31790714..31791862) | 1148 | 0.47311 | 14 | 8  | 6  | 0.1428571 | 0.99902711 | KLF13       | OTUD7A       |   |
| chr15 | +(32058892..32059496) | 604  | 0.04914 | 21 | 11 | 10 | 0.047619  | 0.14542285 | OTUD7A      | CHRNA7       |   |
| chr15 | +(32103945..32104633) | 688  | 0.47311 | 11 | 4  | 7  | 0.2727273 | 0.394      | OTUD7A      | CHRNA7       |   |
| chr15 | +(32107847..32108547) | 700  | 0.02098 | 12 | 7  | 5  | 0.1666667 | 0.00224163 | OTUD7A      | CHRNA7       |   |
| chr15 | +(32438144..32439441) | 1297 | 0.47311 | 15 | 7  | 8  | 0.0666667 | 0.00059687 | CHRNA7      | FAM7A3_dup2  |   |
| chr15 | +(32912132..32912757) | 625  | 1.15732 | 23 | 16 | 7  | 0.3913043 | 0.00132055 | ARHGAP11A   | SCG5         |   |
| chr15 | +(32916234..32916777) | 543  | 0.89935 | 31 | 19 | 12 | 0.2258065 | 0.00089581 | ARHGAP11A   | SCG5         |   |
| chr15 | +(34149750..34150258) | 508  | 2.38943 | 7  | 4  | 3  | 0.1428571 | 0.029      | RYR3        | AVEN         |   |

|       |                       |      |         |    |    |    |           |            |                |          |
|-------|-----------------------|------|---------|----|----|----|-----------|------------|----------------|----------|
| chr15 | +(34241041..34241741) | 700  | 1.13138 | 9  | 3  | 6  | 0.3333333 | 0.012      | RYR3           | AVEN     |
| chr15 | +(34577620..34578799) | 1179 | 0.01044 | 21 | 8  | 13 | 0.2380952 | 0.98976071 | TMEM85         | SLC12A6  |
| chr15 | +(34823255..34824219) | 964  | 0.00402 | 31 | 14 | 17 | 0.0967742 | 0.43692235 | MIR1233-2_dup1 | GOLGA8B  |
| chr15 | +(34826310..34826815) | 505  | 2.38943 | 10 | 6  | 4  | 0.2       | 0.762      | MIR1233-2_dup1 | GOLGA8B  |
| chr15 | +(35044842..35045381) | 539  | 1.13138 | 12 | 4  | 8  | 0.3333333 | 0.341      | MIR1233-2_dup2 | GJD2     |
| chr15 | +(35082434..35082942) | 508  | 2.38943 | 6  | 3  | 3  | 0         | 0.05       | GJD2           | ACTC1    |
| chr15 | +(35085404..35086047) | 643  | 0.47311 | 13 | 8  | 5  | 0.2307692 | 0.00958624 | GJD2           | ACTC1    |
| chr15 | +(35132836..35133536) | 700  | 0.23588 | 9  | 3  | 6  | 0.3333333 | 0.012      | ACTC1          | AQR      |
| chr15 | +(35232799..35233389) | 590  | 1.13138 | 9  | 3  | 6  | 0.3333333 | 0.083      | ACTC1          | AQR      |
| chr15 | +(37389228..37389763) | 535  | 2.38943 | 6  | 4  | 2  | 0.3333333 | 0.067      | LOC145845      | MEIS2    |
| chr15 | +(38765553..38766057) | 504  | 0.47311 | 10 | 4  | 6  | 0.2       | 0.005      | FAM98B         | RASGRP1  |
| chr15 | +(40328144..40329034) | 890  | 0.11295 | 22 | 11 | 11 | 0         | 0.00391362 | EIF2AK4        | SRP14    |
| chr15 | +(40582336..40582998) | 662  | 2.38943 | 11 | 6  | 5  | 0.0909091 | 0.03394459 | LOC100131244   | PLCB2    |
| chr15 | +(40897073..40897615) | 542  | 1.13138 | 9  | 3  | 6  | 0.3333333 | 0.048      | CASC5          | RAD51    |
| chr15 | +(40917325..40917843) | 518  | 2.38943 | 7  | 3  | 4  | 0.1428571 | 0.029      | CASC5          | RAD51    |
| chr15 | +(41142557..41143257) | 700  | 0.02098 | 12 | 6  | 6  | 0         | 0.00197388 | SPINT1         | RHOV     |
| chr15 | +(41796570..41797253) | 683  | 0.47311 | 11 | 7  | 4  | 0.2727273 | 0.082      | ITPKA          | LTK      |
| chr15 | +(42128585..42129285) | 700  | 0.02098 | 13 | 4  | 9  | 0.3846154 | 0.001      | JMJD7-PLA2G4B  | PLA2G4B  |
| chr15 | +(42140875..42141575) | 700  | 0.11295 | 11 | 7  | 4  | 0.2727273 | 0.115      | PLA2G4B        | SPTBN5   |
| chr15 | +(42171906..42172469) | 563  | 2.38943 | 7  | 4  | 3  | 0.1428571 | 0.029      | PLA2G4B        | SPTBN5   |
| chr15 | +(42179210..42179726) | 516  | 2.38943 | 7  | 3  | 4  | 0.1428571 | 0.029      | PLA2G4B        | SPTBN5   |
| chr15 | +(43024212..43025390) | 1178 | 1.13138 | 16 | 5  | 11 | 0.375     | 0.0009184  | STARD9         | CDAN1    |
| chr15 | +(44066591..44067136) | 545  | 0.47311 | 9  | 4  | 5  | 0.1111111 | 0.095      | PDIA3          | ELL3     |
| chr15 | +(45428020..45428635) | 615  | 0.11295 | 14 | 6  | 8  | 0.1428571 | 0.01943355 | DUOX1          | SHF      |
| chr15 | +(48543833..48544354) | 521  | 2.38943 | 9  | 6  | 3  | 0.3333333 | 0.452      | SLC12A1        | DUT      |
| chr15 | +(49657925..49658447) | 522  | 1.13138 | 9  | 3  | 6  | 0.3333333 | 0.357      | LOC100306975   | C15orf33 |
| chr15 | +(49926480..49927025) | 545  | 1.13138 | 15 | 8  | 7  | 0.0666667 | 0.17726974 | DTWD1          | ATP8B4   |
| chr15 | +(50350825..50351521) | 696  | 0.11295 | 10 | 6  | 4  | 0.2       | 0.005      | DTWD1          | ATP8B4   |
| chr15 | +(50494499..50495055) | 556  | 1.13138 | 8  | 5  | 3  | 0.25      | 0.018      | SLC27A2        | HDC      |
| chr15 | +(50503763..50504463) | 700  | 0.11295 | 10 | 6  | 4  | 0.2       | 0.005      | SLC27A2        | HDC      |
| chr15 | +(50916089..50916598) | 509  | 1.13138 | 7  | 4  | 3  | 0.1428571 | 0.029      | USP50          | TRPM7    |
| chr15 | +(51020436..51020937) | 501  | 0.23588 | 9  | 5  | 4  | 0.1111111 | 0.008      | TRPM7          | SPPL2A   |
| chr15 | +(51039513..51040108) | 595  | 0.47311 | 12 | 7  | 5  | 0.1666667 | 0.00591469 | TRPM7          | SPPL2A   |
| chr15 | +(52145323..52146023) | 700  | 0.04914 | 11 | 6  | 5  | 0.0909091 | 0.00308495 | TMOD3          | LEO1     |

v

|       |                       |      |         |    |    |    |           |            |           |         |
|-------|-----------------------|------|---------|----|----|----|-----------|------------|-----------|---------|
| chr15 | +(52356567..52357103) | 536  | 0.73895 | 22 | 7  | 15 | 0.3636364 | 0.04208177 | MAPK6     | BCL2L10 |
| chr15 | +(52671693..52672348) | 655  | 0.23588 | 12 | 5  | 7  | 0.1666667 | 0.04407898 | MIR1266   | MYO5A   |
| chr15 | +(56704266..56704901) | 635  | 0.47311 | 11 | 6  | 5  | 0.0909091 | 0.00308495 | TEX9      | MNS1    |
| chr15 | +(57614482..57615090) | 608  | 1.13138 | 11 | 4  | 7  | 0.2727273 | 0.003      | LOC283663 | CGNL1   |
| chr15 | +(57710889..57711589) | 700  | 0.11295 | 10 | 6  | 4  | 0.2       | 0.005      | CGNL1     | GCOM1   |
| chr15 | +(57831050..57831750) | 700  | 0.11295 | 10 | 6  | 4  | 0.2       | 0.005      | CGNL1     | GCOM1   |
| chr15 | +(58271511..58272447) | 936  | 0.04914 | 18 | 8  | 10 | 0.1111111 | 0.0038429  | GRINL1A   | ALDH1A2 |
| chr15 | +(59415352..59416052) | 700  | 0.02098 | 16 | 6  | 10 | 0.25      | 0.00082904 | CCNB2     | MYO1E   |
| chr15 | +(59435652..59436406) | 754  | 1.13138 | 13 | 6  | 7  | 0.0769231 | 0.0013499  | CCNB2     | MYO1E   |
| chr15 | +(59499780..59500286) | 506  | 2.38943 | 11 | 7  | 4  | 0.2727273 | 0.324      | CCNB2     | MYO1E   |
| chr15 | +(62242811..62243429) | 618  | 1.13138 | 10 | 3  | 7  | 0.4       | 0.017      | RORA      | VPS13C  |
| chr15 | +(62335972..62336489) | 517  | 2.38943 | 9  | 3  | 6  | 0.3333333 | 0.19       | RORA      | VPS13C  |
| chr15 | +(62994825..62995364) | 539  | 2.38943 | 8  | 3  | 5  | 0.25      | 0.018      | TLN2      | MIR190  |
| chr15 | +(63135315..63136214) | 899  | 7.9E-05 | 26 | 11 | 15 | 0.1538462 | 9.2717E-06 | MIR190    | TPM1    |
| chr15 | +(63932827..63933504) | 677  | 2.38943 | 6  | 4  | 2  | 0.3333333 | 0.067      | FBXL22    | HERC1   |
| chr15 | +(63966630..63967165) | 535  | 3.0968  | 14 | 5  | 9  | 0.2857143 | 0.0013499  | FBXL22    | HERC1   |
| chr15 | +(64422275..64422808) | 533  | 2.38943 | 6  | 3  | 3  | 0         | 0.05       | SNX1      | SNX22   |
| chr15 | +(64495066..64495614) | 548  | 2.38943 | 7  | 3  | 4  | 0.1428571 | 0.029      | PPIB      | CSNK1G1 |
| chr15 | +(65145855..65146550) | 695  | 2.38943 | 9  | 3  | 6  | 0.3333333 | 0.012      | PLEKHO2   | ANKDD1A |
| chr15 | +(65148620..65149319) | 699  | 0.23588 | 9  | 6  | 3  | 0.3333333 | 0.012      | PLEKHO2   | ANKDD1A |
| chr15 | +(65158918..65160064) | 1146 | 0.11295 | 17 | 10 | 7  | 0.1764706 | 0.99968185 | PLEKHO2   | ANKDD1A |
| chr15 | +(65180634..65181597) | 963  | 0.01044 | 19 | 7  | 12 | 0.2631579 | 0.02126124 | PLEKHO2   | ANKDD1A |
| chr15 | +(65707207..65707846) | 639  | 2.38943 | 11 | 5  | 6  | 0.0909091 | 0.64249967 | IGDCC3    | IGDCC4  |
| chr15 | +(65945973..65946514) | 541  | 1.13138 | 14 | 7  | 7  | 0         | 0.01750284 | SLC24A1   | DENND4A |
| chr15 | +(65996757..65997298) | 541  | 0.11295 | 10 | 5  | 5  | 0         | 0.00451172 | SLC24A1   | DENND4A |
| chr15 | +(66251143..66251842) | 699  | 0.47311 | 12 | 8  | 4  | 0.3333333 | 0.99671074 | RAB11A    | MEGF11  |
| chr15 | +(66260901..66261534) | 633  | 1.13138 | 11 | 4  | 7  | 0.2727273 | 0.997      | RAB11A    | MEGF11  |
| chr15 | +(66304958..66305485) | 527  | 1.13138 | 7  | 3  | 4  | 0.1428571 | 0.029      | RAB11A    | MEGF11  |
| chr15 | +(66319075..66320255) | 1180 | 2.38943 | 12 | 6  | 6  | 0         | 0.99802612 | RAB11A    | MEGF11  |
| chr15 | +(66388383..66389159) | 776  | 0.00402 | 14 | 8  | 6  | 0.1428571 | 0.00097289 | RAB11A    | MEGF11  |
| chr15 | +(66825250..66825758) | 508  | 1.13138 | 13 | 6  | 7  | 0.0769231 | 0.00757922 | ZWILCH    | LCTL    |
| chr15 | +(66843566..66844132) | 566  | 2.38943 | 9  | 4  | 5  | 0.1111111 | 0.857      | ZWILCH    | LCTL    |
| chr15 | +(67094891..67095479) | 588  | 1.13138 | 7  | 4  | 3  | 0.1428571 | 0.029      | SMAD6     | SMAD3   |
| chr15 | +(67134152..67134852) | 700  | 0.11295 | 10 | 4  | 6  | 0.2       | 0.005      | SMAD6     | SMAD3   |

|       |                       |      |         |    |    |    |           |            |          |          |   |
|-------|-----------------------|------|---------|----|----|----|-----------|------------|----------|----------|---|
| chr15 | +(67158194..67158884) | 690  | 1.13138 | 12 | 7  | 5  | 0.1666667 | 0.99775837 | SMAD6    | SMAD3    |   |
| chr15 | +(67207553..67208248) | 695  | 2.38943 | 9  | 6  | 3  | 0.3333333 | 0.012      | SMAD6    | SMAD3    |   |
| chr15 | +(67446592..67447227) | 635  | 2.38943 | 6  | 3  | 3  | 0         | 0.05       | SMAD3    | AAGAB    |   |
| chr15 | +(67479488..67480419) | 931  | 0.11295 | 18 | 8  | 10 | 0.1111111 | 0.07756579 | SMAD3    | AAGAB    |   |
| chr15 | +(68127474..68127983) | 509  | 0.23588 | 10 | 5  | 5  | 0         | 0.05859256 | SKOR1    | PIAS1    |   |
| chr15 | +(68473325..68473960) | 635  | 1.13138 | 8  | 3  | 5  | 0.25      | 0.018      | PIAS1    | CALML4   |   |
| chr15 | +(68959040..68959571) | 531  | 1.13138 | 7  | 4  | 3  | 0.1428571 | 0.029      | CORO2B   | ANP32A   |   |
| chr15 | +(69023303..69024003) | 700  | 0.02098 | 15 | 8  | 7  | 0.0666667 | 0.00059687 | CORO2B   | ANP32A   |   |
| chr15 | +(69635980..69637340) | 1360 | 1.13138 | 14 | 7  | 7  | 0         | 0.99912744 | PAQR5    | KIF23    |   |
| chr15 | +(70175915..70176615) | 700  | 0.04914 | 11 | 6  | 5  | 0.0909091 | 0.00308495 | C15orf50 | TLE3     | v |
| chr15 | +(70345332..70346180) | 848  | 0.03632 | 17 | 9  | 8  | 0.0588235 | 0.000266   | C15orf50 | TLE3     | v |
| chr15 | +(72432720..72433302) | 582  | 2.38943 | 6  | 2  | 4  | 0.3333333 | 0.067      | SENP8    | GRAMD2   |   |
| chr15 | +(72488617..72489317) | 700  | 0.47311 | 10 | 4  | 6  | 0.2       | 0.457      | SENP8    | GRAMD2   |   |
| chr15 | +(72954337..72954921) | 584  | 0.23588 | 18 | 7  | 11 | 0.2222222 | 0.51805927 | GOLGA6B  | HIGD2B   |   |
| chr15 | +(72957868..72958467) | 599  | 0.04914 | 13 | 8  | 5  | 0.2307692 | 0.00420773 | GOLGA6B  | HIGD2B   |   |
| chr15 | +(73615121..73615767) | 646  | 0.23588 | 9  | 4  | 5  | 0.1111111 | 0.008      | NEO1     | HCN4     |   |
| chr15 | +(74522880..74523408) | 528  | 2.38943 | 6  | 2  | 4  | 0.3333333 | 0.067      | STRA6    | CCDC33   |   |
| chr15 | +(74543164..74543864) | 700  | 2.38943 | 10 | 4  | 6  | 0.2       | 0.995      | CCDC33   | CYP11A1  |   |
| chr15 | +(75107218..75107918) | 700  | 0.01044 | 13 | 8  | 5  | 0.2307692 | 0.0017074  | LMAN1L   | CPLX3    |   |
| chr15 | +(75134372..75134890) | 518  | 2.38943 | 7  | 3  | 4  | 0.1428571 | 0.2        | CPLX3    | ULK3     |   |
| chr15 | +(75466476..75467757) | 1281 | 0.02098 | 23 | 14 | 9  | 0.2173913 | 0.95551349 | PPCDC    | C15orf39 |   |
| chr15 | +(75499770..75500312) | 542  | 2.38943 | 7  | 4  | 3  | 0.1428571 | 0.029      | C15orf39 | GOLGA6C  |   |
| chr15 | +(75554556..75555062) | 506  | 1.13138 | 13 | 8  | 5  | 0.2307692 | 0.02851994 | GOLGA6C  | GOLGA6D  |   |
| chr15 | +(75558519..75559143) | 624  | 0.1169  | 38 | 24 | 14 | 0.2631579 | 4.7363E-05 | GOLGA6C  | GOLGA6D  |   |
| chr15 | +(75579843..75580819) | 976  | 0.25429 | 50 | 18 | 32 | 0.28      | 7.8568E-05 | GOLGA6D  | COMMD4   |   |
| chr15 | +(75648876..75649400) | 524  | 0.47311 | 9  | 5  | 4  | 0.1111111 | 0.008      | MIR631   | MAN2C1   | v |
| chr15 | +(75676417..75676941) | 524  | 2.38943 | 6  | 2  | 4  | 0.3333333 | 0.067      | MAN2C1   | SIN3A    | v |
| chr15 | +(76031125..76032177) | 1052 | 0.23588 | 21 | 12 | 9  | 0.1428571 | 0.9993081  | ODF3L1   | DNM1P35  |   |
| chr15 | +(76074790..76075484) | 694  | 0.11295 | 35 | 22 | 13 | 0.2571429 | 0.09152246 | MIR4313  | UBE2Q2   |   |
| chr15 | +(76171315..76171935) | 620  | 1.13138 | 9  | 6  | 3  | 0.3333333 | 0.012      | UBE2Q2   | FBXO22   |   |
| chr15 | +(76175470..76175992) | 522  | 1.13138 | 10 | 5  | 5  | 0         | 0.00451172 | UBE2Q2   | FBXO22   |   |
| chr15 | +(77301754..77302373) | 619  | 2.38943 | 9  | 3  | 6  | 0.3333333 | 0.988      | PSTPIP1  | TSPAN3   |   |
| chr15 | +(77473914..77474465) | 551  | 1.13138 | 11 | 7  | 4  | 0.2727273 | 0.003      | TSPAN3   | PEAK1    |   |
| chr15 | +(77914964..77915522) | 558  | 0.11295 | 13 | 4  | 9  | 0.3846154 | 0.001      | HMG20A   | LINGO1   |   |

|       |                       |      |         |    |    |    |           |            |            |           |
|-------|-----------------------|------|---------|----|----|----|-----------|------------|------------|-----------|
| chr15 | +(77936666..77937897) | 1231 | 0.11295 | 16 | 9  | 7  | 0.125     | 0.99138242 | LINGO1     | LOC645752 |
| chr15 | +(78020456..78021219) | 763  | 0.02098 | 12 | 6  | 6  | 0         | 0.00197388 | LINGO1     | LOC645752 |
| chr15 | +(78189704..78190700) | 996  | 0.23588 | 19 | 13 | 6  | 0.3684211 | 0.0089409  | LINGO1     | LOC645752 |
| chr15 | +(78208048..78208592) | 544  | 3.4975  | 26 | 16 | 10 | 0.2307692 | 0.00306598 | LINGO1     | LOC645752 |
| chr15 | +(78212176..78212679) | 503  | 2.38943 | 12 | 6  | 6  | 0         | 0.0186865  | LINGO1     | LOC645752 |
| chr15 | +(78213706..78214306) | 600  | 0.50121 | 26 | 13 | 13 | 0         | 7.3434E-06 | LINGO1     | LOC645752 |
| chr15 | +(78277753..78278339) | 586  | 0.01044 | 14 | 6  | 8  | 0.1428571 | 0.01943355 | LOC645752  | LOC91450  |
| chr15 | +(79178342..79178964) | 622  | 0.47311 | 13 | 6  | 7  | 0.0769231 | 0.0013499  | MORF4L1    | CTSH      |
| chr15 | +(79315004..79315592) | 588  | 0.23588 | 9  | 4  | 5  | 0.1111111 | 0.008      | CTSH       | RASGRF1   |
| chr15 | +(79338862..79339427) | 565  | 2.38943 | 11 | 5  | 6  | 0.0909091 | 0.03394459 | CTSH       | RASGRF1   |
| chr15 | +(80451915..80452496) | 581  | 0.47311 | 9  | 5  | 4  | 0.1111111 | 0.008      | FAH        | LOC283688 |
| chr15 | +(80472024..80472664) | 640  | 1.13138 | 7  | 3  | 4  | 0.1428571 | 0.029      | FAH        | LOC283688 |
| chr15 | +(80709996..80710607) | 611  | 0.23588 | 9  | 4  | 5  | 0.1111111 | 0.008      | ARNT2      | FAM108C1  |
| chr15 | +(80772332..80773020) | 688  | 0.47311 | 8  | 4  | 4  | 0         | 0.014      | ARNT2      | FAM108C1  |
| chr15 | +(80885963..80886561) | 598  | 2.38943 | 10 | 5  | 5  | 0         | 0.82639618 | ARNT2      | FAM108C1  |
| chr15 | +(81170881..81171562) | 681  | 1.13138 | 9  | 6  | 3  | 0.3333333 | 0.024      | MIR549     | MESDC2    |
| chr15 | +(83240417..83241551) | 1134 | 0.04914 | 18 | 6  | 12 | 0.3333333 | 0.00037352 | RPS17_dup2 | CPEB1     |
| chr15 | +(83795254..83795761) | 507  | 2.38943 | 9  | 6  | 3  | 0.3333333 | 0.012      | TM6SF1     | HDGFRP3   |
| chr15 | +(84638923..84639623) | 700  | 0.23588 | 10 | 3  | 7  | 0.4       | 0.008      | ADAMTSL3   | LOC648809 |
| chr15 | +(84784373..84785251) | 878  | 0.04914 | 20 | 13 | 7  | 0.3       | 0.10967381 | LOC648809  | LOC440300 |
| chr15 | +(85189254..85189765) | 511  | 2.38943 | 6  | 3  | 3  | 0         | 0.05       | SCAND2     | WDR73     |
| chr15 | +(85405481..85406323) | 842  | 2.38943 | 12 | 6  | 6  | 0         | 0.02733197 | ALPK3      | SLC28A1   |
| chr15 | +(88453180..88453747) | 567  | 0.23588 | 9  | 6  | 3  | 0.3333333 | 0.012      | NCRNA00052 | NTRK3     |
| chr15 | +(88678289..88678808) | 519  | 1.13138 | 10 | 7  | 3  | 0.4       | 0.992      | NCRNA00052 | NTRK3     |
| chr15 | +(89450805..89451315) | 510  | 2.38943 | 8  | 3  | 5  | 0.25      | 0.018      | HAPLN3     | MFGE8     |
| chr15 | +(90984542..90985083) | 541  | 2.38943 | 6  | 2  | 4  | 0.3333333 | 0.067      | IQGAP1     | CRTC3     |
| chr15 | +(91016875..91017431) | 556  | 2.38943 | 8  | 3  | 5  | 0.25      | 0.036      | IQGAP1     | CRTC3     |
| chr15 | +(91037719..91038369) | 650  | 1.13138 | 10 | 6  | 4  | 0.2       | 0.01       | IQGAP1     | CRTC3     |
| chr15 | +(91122299..91122999) | 700  | 0.00402 | 14 | 8  | 6  | 0.1428571 | 0.00097289 | CRTC3      | BLM       |
| chr15 | +(91433417..91434563) | 1146 | 0.04914 | 18 | 6  | 12 | 0.3333333 | 0.71292546 | FES        | MAN2A2    |
| chr15 | +(91460860..91461775) | 915  | 0.11295 | 20 | 10 | 10 | 0         | 0.00630557 | MAN2A2     | UNC45A    |
| chr15 | +(91496906..91497514) | 608  | 2.38943 | 6  | 3  | 3  | 0         | 0.05       | HDDC3      | RCCD1     |
| chr15 | +(91552623..91553323) | 700  | 0.02098 | 13 | 7  | 6  | 0.0769231 | 0.0013499  | PRC1       | VPS33B    |
| chr15 | +(93587296..93588935) | 1639 | 1.13138 | 19 | 12 | 7  | 0.2631579 | 0.43288619 | MIR3175    | RGMA      |

|       |                         |      |         |    |    |    |           |            |           |              |
|-------|-------------------------|------|---------|----|----|----|-----------|------------|-----------|--------------|
| chr15 | +(100160964..100161601) | 637  | 0.23588 | 9  | 5  | 4  | 0.1111111 | 0.008      | MEF2A     | LYSMD4       |
| chr15 | +(100856324..100857024) | 700  | 2.38943 | 11 | 5  | 6  | 0.0909091 | 0.99691505 | C15orf51  | ADAMTS17     |
| chr15 | +(100989024..100989724) | 700  | 0.04914 | 11 | 6  | 5  | 0.0909091 | 0.00308495 | FLJ42289  | LASS3        |
| chr15 | +(101909891..101910591) | 700  | 0.01044 | 13 | 8  | 5  | 0.2307692 | 0.0017074  | SNRPA1    | PCSK6        |
| chr16 | +(239035..239570)       | 535  | 1.12325 | 7  | 3  | 4  | 0.1428571 | 0.029      | HBQ1      | LUC7L        |
| chr16 | +(458188..458727)       | 539  | 2.543   | 9  | 5  | 4  | 0.1111111 | 0.008      | DECR2     | RAB11FIP3    |
| chr16 | +(555327..556023)       | 696  | 0.55004 | 8  | 3  | 5  | 0.25      | 0.018      | RAB11FIP3 | NCRNA00235   |
| chr16 | +(572836..573536)       | 700  | 2.543   | 10 | 4  | 6  | 0.2       | 0.995      | RAB11FIP3 | NCRNA00235   |
| chr16 | +(651624..652152)       | 528  | 2.543   | 8  | 3  | 5  | 0.25      | 0.393      | RAB40C    | WFIKKN1      |
| chr16 | +(781068..781768)       | 700  | 0.01501 | 17 | 10 | 7  | 0.1764706 | 0.00031815 | HAGHL     | NARFL        |
| chr16 | +(906357..907471)       | 1114 | 0.55004 | 15 | 8  | 7  | 0.0666667 | 0.00059687 | PRR25     | LMF1         |
| chr16 | +(988121..988909)       | 788  | 0.00922 | 20 | 10 | 10 | 0         | 7.8526E-05 | PRR25     | LMF1         |
| chr16 | +(1168494..1169121)     | 627  | 0.55004 | 8  | 5  | 3  | 0.25      | 0.018      | C1QTNF8   | CACNA1H      |
| chr16 | +(1173733..1174234)     | 501  | 1.12325 | 7  | 4  | 3  | 0.1428571 | 0.029      | C1QTNF8   | CACNA1H      |
| chr16 | +(1251069..1251708)     | 639  | 1.12325 | 8  | 4  | 4  | 0         | 0.014      | CACNA1H   | TPSG1        |
| chr16 | +(1263847..1264448)     | 601  | 0.23472 | 9  | 6  | 3  | 0.3333333 | 0.012      | CACNA1H   | TPSG1        |
| chr16 | +(1385063..1386006)     | 943  | 0.11182 | 19 | 9  | 10 | 0.0526316 | 0.99988072 | BAIAP3    | C16orf42     |
| chr16 | +(1459914..1460594)     | 680  | 0.11182 | 11 | 7  | 4  | 0.2727273 | 0.003      | GNPTG     | UNKL         |
| chr16 | +(1608601..1609205)     | 604  | 2.543   | 6  | 4  | 2  | 0.3333333 | 0.067      | TELO2     | IFT140       |
| chr16 | +(1617401..1618371)     | 970  | 0.23472 | 16 | 8  | 8  | 0         | 0.00038877 | TELO2     | IFT140       |
| chr16 | +(1681089..1681697)     | 608  | 2.543   | 6  | 3  | 3  | 0         | 0.05       | CRAMP1L   | HN1L         |
| chr16 | +(1699875..1700809)     | 934  | 0.11182 | 16 | 10 | 6  | 0.25      | 0.00056905 | CRAMP1L   | HN1L         |
| chr16 | +(1709591..1710478)     | 887  | 2.543   | 12 | 5  | 7  | 0.1666667 | 0.00224163 | CRAMP1L   | HN1L         |
| chr16 | +(1841671..1842206)     | 535  | 2.543   | 7  | 3  | 4  | 0.1428571 | 0.029      | NUBP2     | IGFALS       |
| chr16 | +(2030495..2031032)     | 537  | 2.543   | 8  | 5  | 3  | 0.25      | 0.036      | TBL3      | NOXO1        |
| chr16 | +(2278460..2279008)     | 548  | 2.543   | 9  | 3  | 6  | 0.3333333 | 0.988      | E4F1      | DNASE1L2     |
| chr16 | +(2336018..2337200)     | 1182 | 0.02629 | 19 | 12 | 7  | 0.2631579 | 0.99980713 | MIR940    | ABCA3        |
| chr16 | +(2367736..2368301)     | 565  | 1.12325 | 8  | 4  | 4  | 0         | 0.1        | MIR940    | ABCA3        |
| chr16 | +(2369663..2370303)     | 640  | 0.11182 | 11 | 5  | 6  | 0.0909091 | 0.03394459 | MIR940    | ABCA3        |
| chr16 | +(2549023..2549657)     | 634  | 0.08266 | 16 | 9  | 7  | 0.125     | 0.00042755 | TBC1D24   | ATP6V0C      |
| chr16 | +(2791134..2791834)     | 700  | 0.06262 | 11 | 4  | 7  | 0.2727273 | 0.003      | PRSS27    | LOC100128788 |
| chr16 | +(2792522..2793114)     | 592  | 0.55004 | 8  | 3  | 5  | 0.25      | 0.018      | PRSS27    | LOC100128788 |
| chr16 | +(3077915..3078613)     | 698  | 1.12325 | 9  | 6  | 3  | 0.3333333 | 0.012      | THOC6     | CCDC64B      |
| chr16 | +(3306226..3306854)     | 628  | 2.543   | 7  | 4  | 3  | 0.1428571 | 0.029      | ZNF200    | MEFV         |

|       |                       |      |         |     |    |    |           |            |           |                |
|-------|-----------------------|------|---------|-----|----|----|-----------|------------|-----------|----------------|
| chr16 | +(3644279..3644979)   | 700  | 0.55004 | 8   | 3  | 5  | 0.25      | 0.018      | NLRC3     | SLX4           |
| chr16 | +(3650889..3651589)   | 700  | 0.11182 | 15  | 6  | 9  | 0.2       | 0.00666417 | NLRC3     | SLX4           |
| chr16 | +(3711013..3711880)   | 867  | 0.00081 | 17  | 9  | 8  | 0.0588235 | 0.000266   | DNASE1    | TRAP1          |
| chr16 | +(3875655..3876355)   | 700  | 1.12325 | 12  | 5  | 7  | 0.1666667 | 0.00224163 | TRAP1     | CREBBP         |
| chr16 | +(4343862..4344560)   | 698  | 2.543   | 9   | 6  | 3  | 0.3333333 | 0.012      | TFAP4     | GLIS2          |
| chr16 | +(4387989..4388507)   | 518  | 2.543   | 6   | 4  | 2  | 0.3333333 | 0.067      | GLIS2     | PAM16          |
| chr16 | +(4572584..4573133)   | 549  | 0.23472 | 9   | 6  | 3  | 0.3333333 | 0.012      | HMOX2     | C16orf5        |
| chr16 | +(4707727..4708338)   | 611  | 2.543   | 6   | 3  | 3  | 0         | 0.05       | MGRN1     | NUDT16L1       |
| chr16 | +(4714669..4715327)   | 658  | 0.02629 | 19  | 12 | 7  | 0.2631579 | 0.02595649 | MGRN1     | NUDT16L1       |
| chr16 | +(4796849..4797549)   | 700  | 0.02629 | 15  | 9  | 6  | 0.2       | 0.00073136 | C16orf71  | ZNF500         |
| chr16 | +(4848927..4849627)   | 700  | 0.02629 | 18  | 12 | 6  | 0.3333333 | 0.98770571 | LOC440335 | ROGDI          |
| chr16 | +(4972789..4973489)   | 700  | 2.543   | 9   | 3  | 6  | 0.3333333 | 0.988      | UBN1      | PPL            |
| chr16 | +(11177137..11177808) | 671  | 0.55004 | 8   | 3  | 5  | 0.25      | 0.018      | CLEC16A   | SOCS1          |
| chr16 | +(11285005..11285608) | 603  | 2.543   | 6   | 3  | 3  | 0         | 0.05       | CLEC16A   | SOCS1          |
| chr16 | +(11303087..11304367) | 1280 | 0.55004 | 22  | 7  | 15 | 0.3636364 | 0.99989252 | CLEC16A   | SOCS1          |
| chr16 | +(11304689..11305220) | 531  | 2.543   | 6   | 2  | 4  | 0.3333333 | 0.067      | CLEC16A   | SOCS1          |
| chr16 | +(11362490..11362997) | 507  | 2.543   | 16  | 8  | 8  | 0         | 0.17228119 | SOCS1     | TNP2           |
| chr16 | +(11773736..11774334) | 598  | 1.12325 | 8   | 4  | 4  | 0         | 0.171      | SNN       | TXNDC11        |
| chr16 | +(11790809..11792026) | 1217 | 1.12325 | 15  | 7  | 8  | 0.0666667 | 0.94740374 | SNN       | TXNDC11        |
| chr16 | +(12145499..12146005) | 506  | 2.74678 | 16  | 8  | 8  | 0         | 0.33721204 | RUNDC2A   | SNX29          |
| chr16 | +(12298475..12299137) | 662  | 1.12325 | 8   | 5  | 3  | 0.25      | 0.125      | SNX29     | CPPED1         |
| chr16 | +(12531650..12532446) | 796  | 0.00422 | 15  | 8  | 7  | 0.0666667 | 0.00059687 | SNX29     | CPPED1         |
| chr16 | +(12673796..12674489) | 693  | 2.543   | 6   | 3  | 3  | 0         | 0.05       | SNX29     | CPPED1         |
| chr16 | +(12886993..12887693) | 700  | 1.12325 | 10  | 7  | 3  | 0.4       | 0.008      | SNX29     | CPPED1         |
| chr16 | +(14136588..14137123) | 535  | 2.543   | 6   | 2  | 4  | 0.3333333 | 0.067      | ERCC4     | MKL2           |
| chr16 | +(14294521..14295031) | 510  | 2.543   | 10  | 5  | 5  | 0         | 0.30075407 | MKL2      | MIR193B        |
| chr16 | +(15082095..15082601) | 506  | 2.543   | 7   | 4  | 3  | 0.1428571 | 0.029      | PDXDC1    | NTAN1          |
| chr16 | +(16336771..16337324) | 553  | 2.1236  | 42  | 19 | 23 | 0.0952381 | 0.00175716 | NOMO3     | MIR3179-1_dup2 |
| chr16 | +(16338685..16339259) | 574  | 0.23472 | 19  | 10 | 9  | 0.0526316 | 0.07082235 | NOMO3     | MIR3179-1_dup2 |
| chr16 | +(16344634..16345261) | 627  | 2.4667  | 36  | 23 | 13 | 0.2777778 | 5.9327E-07 | NOMO3     | MIR3179-1_dup2 |
| chr16 | +(16345903..16346600) | 697  | 0.35077 | 48  | 24 | 24 | 0         | 0.00345475 | NOMO3     | MIR3179-1_dup2 |
| chr16 | +(16363776..16365181) | 1405 | 0.05098 | 100 | 51 | 49 | 0.02      | 0.00023933 | NOMO3     | MIR3179-1_dup2 |
| chr16 | +(17452137..17452952) | 815  | 0.00097 | 18  | 11 | 7  | 0.2222222 | 0.0002444  | PKD1P1    | XYLT1          |
| chr16 | +(20748198..20748829) | 631  | 0.23472 | 15  | 7  | 8  | 0.0666667 | 0.03203876 | ACSM1     | THUMPDI        |

|       |                       |      |         |    |    |    |           |            |                |                |
|-------|-----------------------|------|---------|----|----|----|-----------|------------|----------------|----------------|
| chr16 | +(20974959..20975620) | 661  | 0.23472 | 9  | 4  | 5  | 0.1111111 | 0.008      | LYRM1          | DNAH3          |
| chr16 | +(21079484..21080094) | 610  | 0.55004 | 9  | 5  | 4  | 0.1111111 | 0.143      | LYRM1          | DNAH3          |
| chr16 | +(21117782..21118292) | 510  | 2.543   | 11 | 6  | 5  | 0.0909091 | 0.03394459 | LYRM1          | DNAH3          |
| chr16 | +(21181546..21182208) | 662  | 0.55004 | 12 | 6  | 6  | 0         | 0.00815459 | TMEM159        | ZP2            |
| chr16 | +(21808912..21809570) | 658  | 0.11182 | 15 | 10 | 5  | 0.3333333 | 0.00109982 | OTOA           | RRN3P1         |
| chr16 | +(22269400..22269961) | 561  | 0.06262 | 11 | 6  | 5  | 0.0909091 | 0.00308495 | EEF2K          | POLR3E         |
| chr16 | +(22332846..22333425) | 579  | 1.12325 | 10 | 6  | 4  | 0.2       | 0.543      | POLR3E         | CDR2           |
| chr16 | +(22339493..22340019) | 526  | 0.23472 | 9  | 5  | 4  | 0.1111111 | 0.008      | POLR3E         | CDR2           |
| chr16 | +(22431917..22432822) | 905  | 1.12325 | 13 | 7  | 6  | 0.0769231 | 0.0013499  | CDR2           | RRN3P3         |
| chr16 | +(22579008..22579513) | 505  | 2.74678 | 22 | 12 | 10 | 0.0909091 | 0.00343109 | LOC653786      | MIR548D2       |
| chr16 | +(23063682..23064210) | 528  | 2.543   | 6  | 4  | 2  | 0.3333333 | 0.067      | HS3ST2         | USP31          |
| chr16 | +(23091177..23091715) | 538  | 2.543   | 6  | 2  | 4  | 0.3333333 | 0.067      | HS3ST2         | USP31          |
| chr16 | +(24165909..24166414) | 505  | 0.55004 | 8  | 4  | 4  | 0         | 0.014      | PRKCB          | CACNG3         |
| chr16 | +(27219193..27219893) | 700  | 0.06262 | 11 | 5  | 6  | 0.0909091 | 0.00308495 | JMJD5          | NSMCE1         |
| chr16 | +(27252586..27253236) | 650  | 0.11182 | 10 | 3  | 7  | 0.4       | 0.008      | JMJD5          | NSMCE1         |
| chr16 | +(27413460..27414455) | 995  | 2.543   | 12 | 5  | 7  | 0.1666667 | 0.00224163 | IL4R           | IL21R          |
| chr16 | +(27480879..27481453) | 574  | 2.543   | 9  | 5  | 4  | 0.1111111 | 0.008      | LOC283888      | GTF3C1         |
| chr16 | +(27561183..27561804) | 621  | 2.543   | 8  | 5  | 3  | 0.25      | 0.018      | LOC283888      | GTF3C1         |
| chr16 | +(28112639..28113339) | 700  | 0.11182 | 13 | 7  | 6  | 0.0769231 | 0.5        | GSG1L          | XPO6           |
| chr16 | +(28226728..28227237) | 509  | 2.543   | 6  | 3  | 3  | 0         | 0.05       | XPO6           | SBK1           |
| chr16 | +(28322828..28323453) | 625  | 2.543   | 6  | 2  | 4  | 0.3333333 | 0.067      | SBK1           | EIF3CL_dup1    |
| chr16 | +(28604354..28604902) | 548  | 2.543   | 11 | 4  | 7  | 0.2727273 | 0.324      | CCDC101        | SULT1A2        |
| chr16 | +(28619511..28620035) | 524  | 2.543   | 10 | 5  | 5  | 0         | 0.05859256 | SULT1A2        | SULT1A1        |
| chr16 | +(29301560..29302073) | 513  | 2.543   | 6  | 4  | 2  | 0.3333333 | 0.067      | RRN3P2         | RUNDC2C        |
| chr16 | +(29342392..29343090) | 698  | 2.543   | 12 | 6  | 6  | 0         | 0.00815459 | RUNDC2C        | LOC606724_dup1 |
| chr16 | +(29824381..29825024) | 643  | 1.12325 | 9  | 5  | 4  | 0.1111111 | 0.143      | PRRT2          | C16orf53       |
| chr16 | +(29875383..29876083) | 700  | 0.02629 | 16 | 5  | 11 | 0.375     | 0.96920638 | LOC440356      | SEZ6L2         |
| chr16 | +(29908075..29908634) | 559  | 0.55004 | 12 | 5  | 7  | 0.1666667 | 0.00224163 | LOC440356      | SEZ6L2         |
| chr16 | +(30005699..30006355) | 656  | 1.35514 | 17 | 9  | 8  | 0.0588235 | 0.00468738 | TAOK2          | HIRIP3         |
| chr16 | +(30080732..30081432) | 700  | 0.55004 | 9  | 3  | 6  | 0.3333333 | 0.274      | ALDOA          | PPP4C          |
| chr16 | +(30087885..30088585) | 700  | 0.23472 | 9  | 6  | 3  | 0.3333333 | 0.012      | PPP4C          | TBX6           |
| chr16 | +(30129045..30130062) | 1017 | 0.03584 | 34 | 17 | 17 | 0         | 0.27333358 | GDPD3          | MAPK3          |
| chr16 | +(30204125..30204654) | 529  | 1.95747 | 23 | 12 | 11 | 0.0434783 | 0.00084811 | LOC606724_dup2 | BOLA2B_dup2    |
| chr16 | +(30214123..30214633) | 510  | 0.55004 | 12 | 5  | 7  | 0.1666667 | 0.00368558 | SULT1A4_dup2   | LOC388242_dup2 |



|       |                       |      |         |    |    |    |           |            |            |                |   |
|-------|-----------------------|------|---------|----|----|----|-----------|------------|------------|----------------|---|
| chr16 | +(30304296..30304814) | 518  | 1.02887 | 16 | 11 | 5  | 0.375     | 0.00134045 | LOC613037  | LOC440354_dup2 |   |
| chr16 | +(30315890..30316401) | 511  | 2.543   | 11 | 5  | 6  | 0.0909091 | 0.03394459 | LOC613037  | LOC440354_dup2 |   |
| chr16 | +(30529747..30530429) | 682  | 0.06262 | 15 | 10 | 5  | 0.3333333 | 0.00109982 | ITGAL      | ZNF768         |   |
| chr16 | +(30661858..30662363) | 505  | 0.55004 | 8  | 4  | 4  | 0         | 0.014      | ZNF689     | PRR14          |   |
| chr16 | +(30667094..30667649) | 555  | 2.543   | 6  | 3  | 3  | 0         | 0.05       | PRR14      | FBRS           |   |
| chr16 | +(30721220..30721729) | 509  | 2.543   | 6  | 2  | 4  | 0.3333333 | 0.067      | SRCAP      | SNORA30        |   |
| chr16 | +(30732200..30732793) | 593  | 0.11182 | 15 | 10 | 5  | 0.3333333 | 0.35665159 | SNORA30    | PHKG2          |   |
| chr16 | +(30913918..30914479) | 561  | 2.543   | 6  | 2  | 4  | 0.3333333 | 0.067      | CTF1       | NCRNA00095     |   |
| chr16 | +(30972569..30973269) | 700  | 1.12325 | 12 | 7  | 5  | 0.1666667 | 0.46764153 | SETD1A     | HSD3B7         |   |
| chr16 | +(31089170..31090623) | 1453 | 0.01501 | 25 | 11 | 14 | 0.12      | 0.0696889  | ZNF646     | PRSS53         |   |
| chr16 | +(31190795..31191492) | 697  | 2.543   | 10 | 6  | 4  | 0.2       | 0.995      | PRSS36     | FUS            | v |
| chr16 | +(31201254..31202342) | 1088 | 0.06262 | 23 | 14 | 9  | 0.2173913 | 0.01881766 | FUS        | PYCARD         | v |
| chr16 | +(31447176..31447876) | 700  | 0.11182 | 12 | 7  | 5  | 0.1666667 | 0.02117853 | COX6A2     | ZNF843         |   |
| chr16 | +(31722616..31723316) | 700  | 0.00422 | 15 | 10 | 5  | 0.3333333 | 0.00109982 | KIAA0664L3 | ZNF720         |   |
| chr16 | +(31770308..31770905) | 597  | 2.543   | 9  | 3  | 6  | 0.3333333 | 0.048      | ZNF720     | ZNF267         |   |
| chr16 | +(46615551..46616128) | 577  | 2.543   | 6  | 4  | 2  | 0.3333333 | 0.067      | ANKRD26P1  | SHCBP1         |   |
| chr16 | +(46660396..46660905) | 509  | 2.543   | 7  | 4  | 3  | 0.1428571 | 0.029      | SHCBP1     | VPS35          |   |
| chr16 | +(49720366..49720905) | 539  | 2.543   | 6  | 3  | 3  | 0         | 0.05       | C16orf78   | ZNF423         |   |
| chr16 | +(49994334..49995034) | 700  | 0.02629 | 12 | 5  | 7  | 0.1666667 | 0.00224163 | ZNF423     | TMEM188        |   |
| chr16 | +(50256906..50257428) | 522  | 1.12325 | 9  | 4  | 5  | 0.1111111 | 0.016      | PAPD5      | ADCY7          |   |
| chr16 | +(50368329..50368989) | 660  | 0.55004 | 12 | 4  | 8  | 0.3333333 | 0.008      | ADCY7      | BRD7           |   |
| chr16 | +(50436040..50436570) | 530  | 0.23472 | 9  | 5  | 4  | 0.1111111 | 0.008      | BRD7       | NKD1           |   |
| chr16 | +(53256438..53256992) | 554  | 1.12325 | 8  | 3  | 5  | 0.25      | 0.018      | CHD9       | RBL2           |   |
| chr16 | +(53307949..53308454) | 505  | 2.543   | 12 | 7  | 5  | 0.1666667 | 0.00224163 | CHD9       | RBL2           |   |
| chr16 | +(53341277..53341863) | 586  | 2.543   | 12 | 8  | 4  | 0.3333333 | 0.99671074 | CHD9       | RBL2           |   |
| chr16 | +(55517584..55518098) | 514  | 0.23472 | 10 | 5  | 5  | 0         | 0.00451172 | MMP2       | LPCAT2         | v |
| chr16 | +(55536590..55537290) | 700  | 0.11182 | 11 | 6  | 5  | 0.0909091 | 0.05017413 | MMP2       | LPCAT2         | v |
| chr16 | +(56358718..56359288) | 570  | 2.543   | 6  | 4  | 2  | 0.3333333 | 0.067      | MIR3935    | AMFR           |   |
| chr16 | +(56378958..56379618) | 660  | 1.12325 | 7  | 4  | 3  | 0.1428571 | 0.029      | MIR3935    | AMFR           |   |
| chr16 | +(56667057..56667604) | 547  | 1.12325 | 8  | 5  | 3  | 0.25      | 0.286      | MT1M       | MT1JP          |   |
| chr16 | +(57111452..57112016) | 564  | 0.11182 | 10 | 4  | 6  | 0.2       | 0.005      | NLRC5      | CPNE2          |   |
| chr16 | +(57712244..57712911) | 667  | 0.23472 | 10 | 7  | 3  | 0.4       | 0.008      | GPR97      | CCDC135        |   |
| chr16 | +(57736863..57737687) | 824  | 0.01501 | 13 | 7  | 6  | 0.0769231 | 0.0013499  | CCDC135    | KATNB1         |   |
| chr16 | +(57848780..57849480) | 700  | 0.06262 | 11 | 5  | 6  | 0.0909091 | 0.00308495 | KIFC3      | CNGB1          |   |

|       |                       |      |         |    |    |    |           |            |          |           |   |
|-------|-----------------------|------|---------|----|----|----|-----------|------------|----------|-----------|---|
| chr16 | +(57952935..57953446) | 511  | 1.95747 | 12 | 7  | 5  | 0.1666667 | 0.00224163 | KIFC3    | CNGB1     |   |
| chr16 | +(58068663..58069215) | 552  | 2.543   | 9  | 5  | 4  | 0.1111111 | 0.857      | MMP15    | C16orf80  |   |
| chr16 | +(58529153..58530627) | 1474 | 0.23472 | 24 | 9  | 15 | 0.25      | 0.9999715  | NDRG4    | SETD6     |   |
| chr16 | +(58578960..58579476) | 516  | 2.543   | 9  | 3  | 6  | 0.3333333 | 0.012      | SETD6    | CNOT1     |   |
| chr16 | +(66462810..66463311) | 501  | 2.543   | 6  | 2  | 4  | 0.3333333 | 0.067      | BEAN1    | TK2       |   |
| chr16 | +(66562408..66563108) | 700  | 0.06262 | 16 | 5  | 11 | 0.375     | 0.9990816  | BEAN1    | TK2       |   |
| chr16 | +(66642132..66642797) | 665  | 0.55004 | 12 | 8  | 4  | 0.3333333 | 0.893      | CMTM3    | CMTM4     |   |
| chr16 | +(67100534..67101049) | 515  | 2.543   | 11 | 6  | 5  | 0.0909091 | 0.07206352 | CBFB     | C16orf70  |   |
| chr16 | +(67322276..67322974) | 698  | 0.23472 | 11 | 7  | 4  | 0.2727273 | 0.082      | PLEKHG4  | KCTD19    |   |
| chr16 | +(67449202..67449885) | 683  | 1.12325 | 7  | 4  | 3  | 0.1428571 | 0.029      | TPPP3    | ZDHHC1    |   |
| chr16 | +(67486599..67487652) | 1053 | 0.02629 | 21 | 7  | 14 | 0.3333333 | 0.00288676 | HSD11B2  | ATP6V0D1  |   |
| chr16 | +(67488952..67489471) | 519  | 0.55004 | 8  | 4  | 4  | 0         | 0.014      | HSD11B2  | ATP6V0D1  |   |
| chr16 | +(67576123..67576823) | 700  | 2.543   | 21 | 12 | 9  | 0.1428571 | 0.61189735 | FAM65A   | CTCF      |   |
| chr16 | +(67762656..67763356) | 700  | 0.17238 | 18 | 8  | 10 | 0.1111111 | 0.00018964 | GFOD2    | RANBP10   |   |
| chr16 | +(67859128..67859965) | 837  | 0.55004 | 15 | 7  | 8  | 0.0666667 | 0.00059687 | TSNAXIP1 | CENPT     |   |
| chr16 | +(67924210..67924715) | 505  | 2.543   | 6  | 4  | 2  | 0.3333333 | 0.067      | NRN1L    | PSKH1     |   |
| chr16 | +(67962478..67963178) | 700  | 0.06262 | 12 | 5  | 7  | 0.1666667 | 0.04407898 | PSKH1    | CTRL      |   |
| chr16 | +(67964045..67964853) | 808  | 1.12325 | 15 | 8  | 7  | 0.0666667 | 0.08245742 | PSKH1    | CTRL      |   |
| chr16 | +(67970275..67970833) | 558  | 1.12325 | 10 | 5  | 5  | 0         | 0.00451172 | CTRL     | PSMB10    |   |
| chr16 | +(67978256..67979217) | 961  | 0.00922 | 25 | 11 | 14 | 0.12      | 1.2469E-05 | LCAT     | SLC12A4   |   |
| chr16 | +(67985389..67985892) | 503  | 0.55004 | 9  | 4  | 5  | 0.1111111 | 0.095      | LCAT     | SLC12A4   |   |
| chr16 | +(68025688..68026382) | 694  | 1.95747 | 12 | 5  | 7  | 0.1666667 | 0.00224163 | DPEP3    | DPEP2     |   |
| chr16 | +(68056905..68057605) | 700  | 0.08266 | 19 | 13 | 6  | 0.3684211 | 0.0003125  | DPEP2    | DDX28     |   |
| chr16 | +(68264756..68265864) | 1108 | 1.12325 | 31 | 14 | 17 | 0.0967742 | 0.00111986 | NFATC3   | ESRP2     |   |
| chr16 | +(68718867..68719515) | 648  | 2.543   | 11 | 4  | 7  | 0.2727273 | 0.036      | CDH3     | CDH1      | v |
| chr16 | +(68867121..68867648) | 527  | 2.543   | 6  | 2  | 4  | 0.3333333 | 0.067      | CDH1     | TMCO7     | v |
| chr16 | +(69095394..69096020) | 626  | 1.12325 | 10 | 3  | 7  | 0.4       | 0.992      | TMCO7    | HAS3      |   |
| chr16 | +(69143305..69143933) | 628  | 1.12325 | 9  | 3  | 6  | 0.3333333 | 0.274      | HAS3     | CHTF8     |   |
| chr16 | +(69173659..69174332) | 673  | 1.12325 | 10 | 7  | 3  | 0.4       | 0.017      | CIRH1A   | SNTB2     |   |
| chr16 | +(69193851..69194551) | 700  | 0.11182 | 11 | 7  | 4  | 0.2727273 | 0.003      | CIRH1A   | SNTB2     |   |
| chr16 | +(69873675..69874375) | 700  | 0.24322 | 14 | 8  | 6  | 0.1428571 | 0.00097289 | WWP2     | MIR140    |   |
| chr16 | +(70216158..70216832) | 674  | 0.55004 | 12 | 4  | 8  | 0.3333333 | 0.00328926 | CLEC18C  | LOC729513 |   |
| chr16 | +(70217509..70218175) | 666  | 1.12325 | 15 | 10 | 5  | 0.3333333 | 0.05567345 | CLEC18C  | LOC729513 |   |
| chr16 | +(70431963..70432597) | 634  | 0.11182 | 10 | 5  | 5  | 0         | 0.00451172 | DDX19A   | ST3GAL2   |   |

|       |                       |      |         |    |    |    |           |            |              |          |
|-------|-----------------------|------|---------|----|----|----|-----------|------------|--------------|----------|
| chr16 | +(70450881..70451581) | 700  | 0.11182 | 10 | 6  | 4  | 0.2       | 0.005      | DDX19A       | ST3GAL2  |
| chr16 | +(70733825..70734333) | 508  | 0.23472 | 9  | 4  | 5  | 0.1111111 | 0.008      | MTSS1L       | VAC14    |
| chr16 | +(70781242..70782535) | 1293 | 1.12325 | 18 | 11 | 7  | 0.2222222 | 0.9997556  | MTSS1L       | VAC14    |
| chr16 | +(70785292..70785830) | 538  | 2.543   | 6  | 4  | 2  | 0.3333333 | 0.067      | MTSS1L       | VAC14    |
| chr16 | +(70851998..70852574) | 576  | 0.11182 | 10 | 5  | 5  | 0         | 0.00451172 | LOC100130894 | HYDIN    |
| chr16 | +(70891354..70892094) | 740  | 0.23472 | 12 | 7  | 5  | 0.1666667 | 0.01417552 | LOC100130894 | HYDIN    |
| chr16 | +(70913058..70914076) | 1018 | 0.00949 | 34 | 22 | 12 | 0.2941176 | 0.34590038 | LOC100130894 | HYDIN    |
| chr16 | +(70927594..70928219) | 625  | 2.543   | 10 | 4  | 6  | 0.2       | 0.005      | LOC100130894 | HYDIN    |
| chr16 | +(70951903..70952413) | 510  | 1.12325 | 12 | 8  | 4  | 0.3333333 | 0.285      | LOC100130894 | HYDIN    |
| chr16 | +(71007740..71008785) | 1045 | 0.55004 | 17 | 6  | 11 | 0.2941176 | 0.01351504 | LOC100130894 | HYDIN    |
| chr16 | +(71318638..71319143) | 505  | 2.543   | 9  | 3  | 6  | 0.3333333 | 0.012      | HYDIN        | FTSJD1   |
| chr16 | +(71438812..71439347) | 535  | 2.543   | 6  | 4  | 2  | 0.3333333 | 0.067      | CALB2        | ZNF23    |
| chr16 | +(71482361..71482866) | 505  | 2.543   | 10 | 4  | 6  | 0.2       | 0.695      | CALB2        | ZNF23    |
| chr16 | +(71522803..71523503) | 700  | 0.00018 | 19 | 13 | 6  | 0.3684211 | 0.0003125  | ZNF23        | ZNF19    |
| chr16 | +(71795017..71795558) | 541  | 2.543   | 9  | 3  | 6  | 0.3333333 | 0.726      | SNORA70D     | AP1G1    |
| chr16 | +(71977806..71978411) | 605  | 0.55004 | 14 | 6  | 8  | 0.1428571 | 0.00335314 | KIAA0174     | PKD1L3   |
| chr16 | +(72153598..72154271) | 673  | 2.74678 | 19 | 7  | 12 | 0.2631579 | 0.00264348 | DHX38        | PMFBP1   |
| chr16 | +(72204750..72205335) | 585  | 2.543   | 6  | 2  | 4  | 0.3333333 | 0.067      | DHX38        | PMFBP1   |
| chr16 | +(74443073..74443881) | 808  | 0.55004 | 21 | 11 | 10 | 0.047619  | 0.06960017 | LOC283922    | CLEC18B  |
| chr16 | +(74702109..74702674) | 565  | 2.543   | 9  | 4  | 5  | 0.1111111 | 0.206      | RFWD3        | MLKL     |
| chr16 | +(74712596..74713118) | 522  | 2.543   | 6  | 2  | 4  | 0.3333333 | 0.067      | RFWD3        | MLKL     |
| chr16 | +(75351784..75352484) | 700  | 0.55004 | 9  | 3  | 6  | 0.3333333 | 0.274      | BCAR1        | CFDP1    |
| chr16 | +(75563829..75564525) | 696  | 0.55004 | 10 | 7  | 3  | 0.4       | 0.008      | CHST6        | CHST5    |
| chr16 | +(81094909..81095447) | 538  | 1.12325 | 9  | 6  | 3  | 0.3333333 | 0.274      | ATMIN        | C16orf46 |
| chr16 | +(81410715..81411327) | 612  | 2.543   | 11 | 6  | 5  | 0.0909091 | 0.02230486 | GAN          | CMIP     |
| chr16 | +(81520714..81521409) | 695  | 0.23472 | 9  | 6  | 3  | 0.3333333 | 0.012      | CMIP         | PLCG2    |
| chr16 | +(81730702..81731353) | 651  | 2.543   | 6  | 4  | 2  | 0.3333333 | 0.067      | CMIP         | PLCG2    |
| chr16 | +(81956838..81957449) | 611  | 0.11182 | 13 | 5  | 8  | 0.2307692 | 0.23210716 | PLCG2        | SDR42E1  |
| chr16 | +(82037876..82038576) | 700  | 2.543   | 10 | 4  | 6  | 0.2       | 0.995      | PLCG2        | SDR42E1  |
| chr16 | +(84035237..84035830) | 593  | 2.543   | 9  | 6  | 3  | 0.3333333 | 0.012      | NECAB2       | SLC38A8  |
| chr16 | +(84328457..84329597) | 1140 | 0.11182 | 17 | 7  | 10 | 0.1764706 | 0.99968185 | WFDC1        | ATP2C2   |
| chr16 | +(84426274..84427401) | 1127 | 1.12325 | 13 | 7  | 6  | 0.0769231 | 0.9986501  | ATP2C2       | KIAA1609 |
| chr16 | +(84495168..84495690) | 522  | 1.12325 | 8  | 3  | 5  | 0.25      | 0.018      | ATP2C2       | KIAA1609 |
| chr16 | +(84632462..84633162) | 700  | 0.23472 | 9  | 3  | 6  | 0.3333333 | 0.012      | KIAA1609     | COTL1    |

|       |                       |      |         |    |    |    |           |            |              |          |
|-------|-----------------------|------|---------|----|----|----|-----------|------------|--------------|----------|
| chr16 | +(84878133..84878841) | 708  | 0.00081 | 22 | 7  | 15 | 0.3636364 | 0.00010748 | CRISPLD2     | ZDHHC7   |
| chr16 | +(84919605..84920545) | 940  | 0.06262 | 19 | 11 | 8  | 0.1578947 | 0.00013997 | CRISPLD2     | ZDHHC7   |
| chr16 | +(85139526..85140270) | 744  | 0.02629 | 15 | 6  | 9  | 0.2       | 0.00073136 | KIAA0513     | FAM92B   |
| chr16 | +(85214032..85214615) | 583  | 0.23472 | 9  | 3  | 6  | 0.3333333 | 0.012      | LOC400548    | KIAA0182 |
| chr16 | +(85215601..85216343) | 742  | 1.12325 | 14 | 7  | 7  | 0         | 0.00087256 | LOC400548    | KIAA0182 |
| chr16 | +(85337605..85338124) | 519  | 2.543   | 6  | 3  | 3  | 0         | 0.05       | LOC400548    | KIAA0182 |
| chr16 | +(85599875..85600570) | 695  | 2.543   | 9  | 6  | 3  | 0.3333333 | 0.988      | LOC400548    | KIAA0182 |
| chr16 | +(85603238..85603762) | 524  | 0.23472 | 9  | 4  | 5  | 0.1111111 | 0.008      | LOC400548    | KIAA0182 |
| chr16 | +(85613875..85614443) | 568  | 2.543   | 13 | 8  | 5  | 0.2307692 | 0.23210716 | LOC400548    | KIAA0182 |
| chr16 | +(85615164..85615864) | 700  | 0.06262 | 16 | 11 | 5  | 0.375     | 0.9990816  | LOC400548    | KIAA0182 |
| chr16 | +(85690722..85691314) | 592  | 2.543   | 9  | 6  | 3  | 0.3333333 | 0.988      | KIAA0182     | GINS2    |
| chr16 | +(85814560..85815146) | 586  | 2.543   | 6  | 4  | 2  | 0.3333333 | 0.067      | MIR1910      | COX4NB   |
| chr16 | +(86585397..86586097) | 700  | 0.02629 | 16 | 6  | 10 | 0.25      | 0.00240046 | FOXF1        | MTHFSD   |
| chr16 | +(87403638..87404506) | 868  | 0.00018 | 19 | 6  | 13 | 0.3684211 | 0.0003125  | LOC100288525 | FBXO31   |
| chr16 | +(87741358..87742064) | 706  | 0.01501 | 13 | 9  | 4  | 0.3846154 | 0.001      | LOC100129637 | KLHDC4   |
| chr16 | +(87815042..87815742) | 700  | 1.12325 | 12 | 7  | 5  | 0.1666667 | 0.00224163 | KLHDC4       | SLC7A5   |
| chr16 | +(87896556..87897107) | 551  | 1.12325 | 7  | 3  | 4  | 0.1428571 | 0.029      | KLHDC4       | SLC7A5   |
| chr16 | +(88570055..88570695) | 640  | 1.12325 | 7  | 3  | 4  | 0.1428571 | 0.029      | ZFPM1        | ZC3H18   |
| chr16 | +(88626808..88627876) | 1068 | 0.11182 | 20 | 10 | 10 | 0         | 7.8526E-05 | ZFPM1        | ZC3H18   |
| chr16 | +(88630580..88631194) | 614  | 0.11182 | 10 | 3  | 7  | 0.4       | 0.008      | ZFPM1        | ZC3H18   |
| chr16 | +(88719108..88720260) | 1152 | 0.06262 | 21 | 11 | 10 | 0.047619  | 0.28660066 | CYBA         | MVD      |
| chr16 | +(88725397..88725907) | 510  | 2.543   | 6  | 2  | 4  | 0.3333333 | 0.067      | CYBA         | MVD      |
| chr16 | +(88827147..88827648) | 501  | 1.12325 | 7  | 3  | 4  | 0.1428571 | 0.029      | CTU2         | FAM38A   |
| chr16 | +(88831354..88831958) | 604  | 0.06262 | 14 | 5  | 9  | 0.2857143 | 0.15865525 | CTU2         | FAM38A   |
| chr16 | +(88898372..88898985) | 613  | 1.12325 | 7  | 4  | 3  | 0.1428571 | 0.029      | APRT         | GALNS    |
| chr16 | +(88946316..88946961) | 645  | 2.543   | 9  | 5  | 4  | 0.1111111 | 0.857      | PABPN1L      | CBFA2T3  |
| chr16 | +(89003812..89004346) | 534  | 0.11182 | 10 | 7  | 3  | 0.4       | 0.008      | PABPN1L      | CBFA2T3  |
| chr16 | +(89102986..89104239) | 1253 | 0.06262 | 21 | 9  | 12 | 0.1428571 | 6.2118E-05 | CBFA2T3      | ACSF3    |
| chr16 | +(89119025..89120202) | 1177 | 0.11182 | 20 | 9  | 11 | 0.1       | 8.472E-05  | CBFA2T3      | ACSF3    |
| chr16 | +(89133206..89133870) | 664  | 2.543   | 6  | 2  | 4  | 0.3333333 | 0.067      | CBFA2T3      | ACSF3    |
| chr16 | +(89212984..89213496) | 512  | 2.543   | 6  | 3  | 3  | 0         | 0.05       | ACSF3        | C16orf81 |
| chr16 | +(89243953..89244608) | 655  | 0.55004 | 8  | 4  | 4  | 0         | 0.014      | CDH15        | ZNF778   |
| chr16 | +(89370750..89371350) | 600  | 2.543   | 6  | 4  | 2  | 0.3333333 | 0.067      | ZNF778       | ANKRD11  |
| chr16 | +(89379108..89379744) | 636  | 2.543   | 6  | 3  | 3  | 0         | 0.05       | ZNF778       | ANKRD11  |

|       |                       |      |         |    |    |    |           |            |              |         |
|-------|-----------------------|------|---------|----|----|----|-----------|------------|--------------|---------|
| chr16 | +(89454947..89455517) | 570  | 0.55004 | 8  | 3  | 5  | 0.25      | 0.018      | ZNF778       | ANKRD11 |
| chr16 | +(89617511..89618169) | 658  | 0.55004 | 8  | 3  | 5  | 0.25      | 0.018      | SPG7         | RPL13   |
| chr16 | +(89623218..89623728) | 510  | 2.543   | 9  | 5  | 4  | 0.1111111 | 0.548      | SPG7         | RPL13   |
| chr16 | +(89849064..89849600) | 536  | 2.543   | 11 | 5  | 6  | 0.0909091 | 0.42756607 | ZNF276       | FANCA   |
| chr16 | +(89970395..89971050) | 655  | 1.12325 | 8  | 5  | 3  | 0.25      | 0.018      | TCF25        | MC1R    |
| chr16 | +(90124496..90125006) | 510  | 2.543   | 10 | 5  | 5  | 0         | 0.03790009 | LOC100130015 | PRDM7   |
| chr16 | +(90161513..90162015) | 502  | 1.12325 | 11 | 4  | 7  | 0.2727273 | 0.012      | PRDM7        |         |
| chr16 | +(90170779..90171308) | 529  | 1.12325 | 10 | 4  | 6  | 0.2       | 0.019      | PRDM7        |         |
| chr17 | +(94538..95351)       | 813  | 0.00099 | 18 | 6  | 12 | 0.3333333 | 0.00037352 | DOC2B        | RPH3AL  |
| chr17 | +(96258..96868)       | 610  | 1.42674 | 7  | 3  | 4  | 0.1428571 | 0.029      | DOC2B        | RPH3AL  |
| chr17 | +(101400..102081)     | 681  | 0.17344 | 10 | 7  | 3  | 0.4       | 0.008      | DOC2B        | RPH3AL  |
| chr17 | +(123138..123640)     | 502  | 3.12167 | 6  | 4  | 2  | 0.3333333 | 0.067      | DOC2B        | RPH3AL  |
| chr17 | +(133438..134138)     | 700  | 0.70612 | 9  | 6  | 3  | 0.3333333 | 0.274      | DOC2B        | RPH3AL  |
| chr17 | +(147230..148245)     | 1015 | 0.70612 | 14 | 8  | 6  | 0.1428571 | 0.99902711 | DOC2B        | RPH3AL  |
| chr17 | +(177835..178535)     | 700  | 1.42674 | 11 | 7  | 4  | 0.2727273 | 0.997      | DOC2B        | RPH3AL  |
| chr17 | +(435862..436402)     | 540  | 0.70612 | 10 | 3  | 7  | 0.4       | 0.742      | FAM101B      | VPS53   |
| chr17 | +(694560..695081)     | 521  | 0.17344 | 17 | 7  | 10 | 0.1764706 | 0.31279262 | RNMTL1       | NXN     |
| chr17 | +(728825..729429)     | 604  | 0.70612 | 8  | 4  | 4  | 0         | 0.014      | RNMTL1       | NXN     |
| chr17 | +(773016..773585)     | 569  | 3.12167 | 6  | 4  | 2  | 0.3333333 | 0.067      | RNMTL1       | NXN     |
| chr17 | +(915968..916668)     | 700  | 0.70612 | 12 | 5  | 7  | 0.1666667 | 0.00224163 | TIMM22       | ABR     |
| chr17 | +(984007..984685)     | 678  | 0.70612 | 14 | 8  | 6  | 0.1428571 | 0.00097289 | TIMM22       | ABR     |
| chr17 | +(994333..995482)     | 1149 | 0.70612 | 19 | 9  | 10 | 0.0526316 | 0.00072543 | TIMM22       | ABR     |
| chr17 | +(1031563..1032263)   | 700  | 3.12167 | 10 | 4  | 6  | 0.2       | 0.995      | TIMM22       | ABR     |
| chr17 | +(1472713..1473835)   | 1122 | 0.04228 | 18 | 11 | 7  | 0.2222222 | 0.0002444  | PITPNA       | SLC43A2 |
| chr17 | +(1496344..1496953)   | 609  | 0.01781 | 13 | 9  | 4  | 0.3846154 | 0.001      | PITPNA       | SLC43A2 |
| chr17 | +(1531561..1532092)   | 531  | 3.12167 | 6  | 2  | 4  | 0.3333333 | 0.067      | PITPNA       | SLC43A2 |
| chr17 | +(1761023..1761525)   | 502  | 0.70612 | 10 | 4  | 6  | 0.2       | 0.005      | RPA1         | RTN4RL1 |
| chr17 | +(2699741..2700398)   | 657  | 3.12167 | 10 | 6  | 4  | 0.2       | 0.457      | RAP1GAP2     | OR1D5   |
| chr17 | +(2760060..2760683)   | 623  | 1.42674 | 7  | 4  | 3  | 0.1428571 | 0.029      | RAP1GAP2     | OR1D5   |
| chr17 | +(2768950..2769545)   | 595  | 0.70612 | 8  | 4  | 4  | 0         | 0.014      | RAP1GAP2     | OR1D5   |
| chr17 | +(2787105..2787690)   | 585  | 0.32584 | 9  | 5  | 4  | 0.1111111 | 0.008      | RAP1GAP2     | OR1D5   |
| chr17 | +(2801667..2802269)   | 602  | 0.70612 | 8  | 4  | 4  | 0         | 0.014      | RAP1GAP2     | OR1D5   |
| chr17 | +(2823984..2824684)   | 700  | 0.32584 | 9  | 6  | 3  | 0.3333333 | 0.012      | RAP1GAP2     | OR1D5   |
| chr17 | +(3548360..3549007)   | 647  | 0.32584 | 9  | 4  | 5  | 0.1111111 | 0.008      | CTNS         | TAX1BP3 |

|       |                     |      |         |    |    |    |           |            |          |          |   |
|-------|---------------------|------|---------|----|----|----|-----------|------------|----------|----------|---|
| chr17 | +(3584272..3584834) | 562  | 0.70612 | 8  | 5  | 3  | 0.25      | 0.018      | TMEM93   | P2RX5    |   |
| chr17 | +(3592680..3593435) | 755  | 0.01033 | 18 | 11 | 7  | 0.2222222 | 0.00216645 | TMEM93   | P2RX5    |   |
| chr17 | +(3785886..3786430) | 544  | 1.42674 | 8  | 4  | 4  | 0         | 0.171      | C17orf85 | CAMKK1   |   |
| chr17 | +(3817376..3817965) | 589  | 0.17344 | 10 | 4  | 6  | 0.2       | 0.005      | CAMKK1   | P2RX1    |   |
| chr17 | +(4442608..4443123) | 515  | 3.12167 | 6  | 2  | 4  | 0.3333333 | 0.067      | SPNS2    | MYBBP1A  |   |
| chr17 | +(4448817..4449624) | 807  | 0.01033 | 22 | 9  | 13 | 0.1818182 | 0.30824348 | SPNS2    | MYBBP1A  |   |
| chr17 | +(4478921..4479535) | 614  | 0.09029 | 15 | 6  | 9  | 0.2       | 0.85557782 | GGT6     | SMTNL2   |   |
| chr17 | +(4505931..4506568) | 637  | 0.32584 | 9  | 5  | 4  | 0.1111111 | 0.008      | SMTNL2   | ALOX15   |   |
| chr17 | +(4797401..4798101) | 700  | 0.01781 | 13 | 9  | 4  | 0.3846154 | 0.001      | MINK1    | CHRNE    | v |
| chr17 | +(4805601..4806175) | 574  | 0.70612 | 10 | 7  | 3  | 0.4       | 0.017      | MINK1    | CHRNE    | v |
| chr17 | +(4842603..4843291) | 688  | 1.42674 | 9  | 6  | 3  | 0.3333333 | 0.048      | GP1BA    | SLC25A11 |   |
| chr17 | +(5045256..5045900) | 644  | 0.70612 | 12 | 6  | 6  | 0         | 0.00520281 | USP6     | ZNF594   |   |
| chr17 | +(5048651..5049161) | 510  | 3.12167 | 8  | 5  | 3  | 0.25      | 0.196      | USP6     | ZNF594   |   |
| chr17 | +(5049218..5049786) | 568  | 0.70612 | 10 | 7  | 3  | 0.4       | 0.008      | USP6     | ZNF594   |   |
| chr17 | +(5075943..5076489) | 546  | 1.42674 | 11 | 4  | 7  | 0.2727273 | 0.003      | USP6     | ZNF594   |   |
| chr17 | +(6349510..6350210) | 700  | 1.42674 | 10 | 3  | 7  | 0.4       | 0.992      | FAM64A   | PITPNM3  |   |
| chr17 | +(6390939..6391635) | 696  | 3.12167 | 9  | 6  | 3  | 0.3333333 | 0.988      | FAM64A   | PITPNM3  |   |
| chr17 | +(6458160..6458715) | 555  | 0.70612 | 8  | 4  | 4  | 0         | 0.014      | FAM64A   | PITPNM3  |   |
| chr17 | +(6462669..6463391) | 722  | 0.00438 | 15 | 8  | 7  | 0.0666667 | 0.00059687 | PITPNM3  | KIAA0753 |   |
| chr17 | +(7130596..7131171) | 575  | 3.12167 | 8  | 4  | 4  | 0         | 0.171      | MIR324   | DVL2     |   |
| chr17 | +(7190378..7191078) | 700  | 0.32584 | 10 | 4  | 6  | 0.2       | 0.005      | SLC2A4   | YBX2     |   |
| chr17 | +(7196862..7197541) | 679  | 0.70612 | 12 | 4  | 8  | 0.3333333 | 0.976      | SLC2A4   | YBX2     |   |
| chr17 | +(7393122..7393822) | 700  | 0.09029 | 11 | 6  | 5  | 0.0909091 | 0.00308495 | POLR2A   | TNFSF12  |   |
| chr17 | +(7416262..7416861) | 599  | 1.13024 | 28 | 15 | 13 | 0.0714286 | 0.01129689 | POLR2A   | TNFSF12  |   |
| chr17 | +(7464430..7464943) | 513  | 0.70612 | 8  | 3  | 5  | 0.25      | 0.018      | TNFSF13  | SENP3    |   |
| chr17 | +(7466349..7467466) | 1117 | 0.70612 | 16 | 7  | 9  | 0.125     | 0.00042755 | SENP3    | EIF4A1   |   |
| chr17 | +(7480378..7480879) | 501  | 2.28029 | 12 | 5  | 7  | 0.1666667 | 0.02117853 | SNORD10  | SNORA67  |   |
| chr17 | +(7483147..7483793) | 646  | 0.01781 | 19 | 7  | 12 | 0.2631579 | 0.0020296  | CD68     | MPDU1    |   |
| chr17 | +(7491452..7492037) | 585  | 0.32584 | 10 | 5  | 5  | 0         | 0.00451172 | MPDU1    | SOX15    |   |
| chr17 | +(7554413..7555145) | 732  | 0.04228 | 15 | 5  | 10 | 0.3333333 | 0.0330963  | ATP1B2   | TP53     |   |
| chr17 | +(7576562..7577115) | 553  | 3.12167 | 9  | 4  | 5  | 0.1111111 | 0.206      | ATP1B2   | TP53     |   |
| chr17 | +(7695948..7696547) | 599  | 1.42674 | 7  | 3  | 4  | 0.1428571 | 0.029      | RPL29P2  | KDM6B    |   |
| chr17 | +(7718107..7718807) | 700  | 0.17344 | 10 | 4  | 6  | 0.2       | 0.005      | RPL29P2  | KDM6B    |   |
| chr17 | +(8166156..8166711) | 555  | 3.12167 | 9  | 5  | 4  | 0.1111111 | 0.032      | PFAS     | SLC25A35 |   |

|       |                       |      |         |    |    |    |           |            |          |           |
|-------|-----------------------|------|---------|----|----|----|-----------|------------|----------|-----------|
| chr17 | +(9007878..9008412)   | 534  | 3.12167 | 8  | 5  | 3  | 0.25      | 0.018      | NTN1     | STX8      |
| chr17 | +(9085692..9086392)   | 700  | 0.01781 | 16 | 9  | 7  | 0.125     | 0.13318996 | NTN1     | STX8      |
| chr17 | +(9114085..9114785)   | 700  | 0.17344 | 14 | 6  | 8  | 0.1428571 | 0.84915021 | NTN1     | STX8      |
| chr17 | +(9232858..9233558)   | 700  | 0.09029 | 11 | 7  | 4  | 0.2727273 | 0.003      | NTN1     | STX8      |
| chr17 | +(9503080..9503642)   | 562  | 3.12167 | 6  | 2  | 4  | 0.3333333 | 0.067      | WDR16    | USP43     |
| chr17 | +(9596100..9596752)   | 652  | 3.12167 | 8  | 3  | 5  | 0.25      | 0.036      | USP43    | DHRS7C    |
| chr17 | +(9775141..9776293)   | 1152 | 3.12167 | 12 | 6  | 6  | 0         | 0.00197388 | GLP2R    | RCVRN     |
| chr17 | +(10000182..10000882) | 700  | 3.12167 | 11 | 6  | 5  | 0.0909091 | 0.99691505 | RCVRN    | GAS7      |
| chr17 | +(10206405..10207081) | 676  | 2.28029 | 17 | 9  | 8  | 0.0588235 | 0.00194621 | GAS7     | MYH13     |
| chr17 | +(10303762..10304462) | 700  | 0.70612 | 13 | 9  | 4  | 0.3846154 | 0.926      | MYH13    | MYH8      |
| chr17 | +(12897453..12898046) | 593  | 1.42674 | 9  | 3  | 6  | 0.3333333 | 0.012      | ARHGAP44 | ELAC2     |
| chr17 | +(12900306..12901006) | 700  | 0.70612 | 10 | 4  | 6  | 0.2       | 0.005      | ARHGAP44 | ELAC2     |
| chr17 | +(15612911..15614100) | 1189 | 0.70612 | 18 | 10 | 8  | 0.1111111 | 0.00168325 | ZNF286A  | TBC1D26   |
| chr17 | +(16068064..16068631) | 567  | 0.70612 | 10 | 5  | 5  | 0         | 0.0081468  | TTC19    | NCOR1     |
| chr17 | +(16285423..16285970) | 547  | 0.70612 | 16 | 6  | 10 | 0.25      | 0.45681333 | UBB      | TRPV2     |
| chr17 | +(16611971..16612671) | 700  | 0.81546 | 41 | 25 | 16 | 0.2195122 | 0.0325841  | CCDC144A | LOC162632 |
| chr17 | +(16631031..16631533) | 502  | 3.12167 | 13 | 6  | 7  | 0.0769231 | 0.00213737 | CCDC144A | LOC162632 |
| chr17 | +(16701350..16701864) | 514  | 3.12167 | 8  | 4  | 4  | 0         | 0.057      | FAM106C  | KRT16P2   |
| chr17 | +(16978664..16979844) | 1180 | 1.42674 | 13 | 5  | 8  | 0.2307692 | 0.0017074  | MPRIP    | PLD6      |
| chr17 | +(17010599..17011396) | 797  | 0.17344 | 16 | 9  | 7  | 0.125     | 0.00042755 | MPRIP    | PLD6      |
| chr17 | +(17039471..17039991) | 520  | 3.12167 | 6  | 2  | 4  | 0.3333333 | 0.067      | MPRIP    | PLD6      |
| chr17 | +(17064427..17065015) | 588  | 3.12167 | 6  | 2  | 4  | 0.3333333 | 0.067      | MPRIP    | PLD6      |
| chr17 | +(17105902..17106428) | 526  | 1.42674 | 8  | 5  | 3  | 0.25      | 0.125      | MPRIP    | PLD6      |
| chr17 | +(17506638..17507280) | 642  | 1.42674 | 7  | 4  | 3  | 0.1428571 | 0.029      | PEMT     | RAI1      |
| chr17 | +(17512717..17513252) | 535  | 3.12167 | 6  | 3  | 3  | 0         | 0.05       | PEMT     | RAI1      |
| chr17 | +(17555038..17556376) | 1338 | 0.00438 | 24 | 9  | 15 | 0.25      | 0.9999715  | PEMT     | RAI1      |
| chr17 | +(17626070..17626663) | 593  | 3.12167 | 7  | 3  | 4  | 0.1428571 | 0.2        | RAI1     | SMCR5     |
| chr17 | +(18000980..18002172) | 1192 | 0.70612 | 15 | 7  | 8  | 0.0666667 | 0.98968122 | DRG2     | MYO15A    |
| chr17 | +(18039572..18040107) | 535  | 3.12167 | 6  | 2  | 4  | 0.3333333 | 0.067      | MYO15A   | ALKBH5    |
| chr17 | +(18137919..18138469) | 550  | 3.12167 | 7  | 3  | 4  | 0.1428571 | 0.029      | LLGL1    | FLII      |
| chr17 | +(18486367..18486878) | 511  | 3.12167 | 15 | 9  | 6  | 0.2       | 0.00160811 | FAM106A  | CCDC144B  |
| chr17 | +(18850441..18851577) | 1136 | 1.42674 | 13 | 7  | 6  | 0.0769231 | 0.9986501  | PRPSAP2  | SLC5A10   |
| chr17 | +(18917405..18918508) | 1103 | 0.70612 | 18 | 9  | 9  | 0         | 0.0015476  | FAM83G   | GRAP      |
| chr17 | +(19284943..19285476) | 533  | 1.42674 | 9  | 5  | 4  | 0.1111111 | 0.008      | MAPK7    | MFAP4     |

|       |                       |      |         |    |    |    |           |            |          |           |   |
|-------|-----------------------|------|---------|----|----|----|-----------|------------|----------|-----------|---|
| chr17 | +(19646284..19646984) | 700  | 0.09029 | 16 | 11 | 5  | 0.375     | 0.0009184  | SLC47A2  | ALDH3A1   |   |
| chr17 | +(20015018..20015570) | 552  | 1.42674 | 9  | 5  | 4  | 0.1111111 | 0.008      | SPECC1   | CCDC144C  |   |
| chr17 | +(20134968..20135652) | 684  | 0.17344 | 11 | 7  | 4  | 0.2727273 | 0.003      | SPECC1   | CCDC144C  |   |
| chr17 | +(20241193..20241722) | 529  | 2.0662  | 24 | 10 | 14 | 0.1666667 | 0.00296128 | CCDC144C | LGALS9B   |   |
| chr17 | +(20254354..20254894) | 540  | 2.0662  | 25 | 9  | 16 | 0.28      | 0.67469352 | CCDC144C | LGALS9B   |   |
| chr17 | +(20261067..20261591) | 524  | 1.74239 | 38 | 20 | 18 | 0.0526316 | 0.00425452 | CCDC144C | LGALS9B   |   |
| chr17 | +(20265274..20266030) | 756  | 2.75008 | 38 | 16 | 22 | 0.1578947 | 0.0011624  | CCDC144C | LGALS9B   |   |
| chr17 | +(20266080..20266600) | 520  | 0.70612 | 12 | 7  | 5  | 0.1666667 | 0.00591469 | CCDC144C | LGALS9B   |   |
| chr17 | +(20304139..20305002) | 863  | 0.55542 | 43 | 26 | 17 | 0.2093023 | 1.5022E-05 | CCDC144C | LGALS9B   |   |
| chr17 | +(20321291..20321803) | 512  | 1.42674 | 11 | 6  | 5  | 0.0909091 | 0.00529357 | CCDC144C | LGALS9B   |   |
| chr17 | +(20641060..20641575) | 515  | 3.12167 | 6  | 4  | 2  | 0.3333333 | 0.067      | CDRT15L2 | CCDC144NL |   |
| chr17 | +(20683781..20684478) | 697  | 0.32584 | 9  | 6  | 3  | 0.3333333 | 0.012      | CDRT15L2 | CCDC144NL |   |
| chr17 | +(20768577..20769269) | 692  | 0.32584 | 12 | 6  | 6  | 0         | 0.00197388 | CDRT15L2 | CCDC144NL |   |
| chr17 | +(21075154..21075655) | 501  | 0.70612 | 10 | 5  | 5  | 0         | 0.05859256 | DHRS7B   | TMEM11    |   |
| chr17 | +(21192303..21193454) | 1151 | 0.70612 | 19 | 7  | 12 | 0.2631579 | 0.72294343 | MAP2K3   | KCNJ12    |   |
| chr17 | +(21199842..21200517) | 675  | 1.42674 | 7  | 4  | 3  | 0.1428571 | 0.029      | MAP2K3   | KCNJ12    |   |
| chr17 | +(21210346..21210908) | 562  | 0.70612 | 8  | 5  | 3  | 0.25      | 0.018      | MAP2K3   | KCNJ12    |   |
| chr17 | +(21240741..21241379) | 638  | 1.42674 | 7  | 4  | 3  | 0.1428571 | 0.029      | MAP2K3   | KCNJ12    |   |
| chr17 | +(21317085..21317652) | 567  | 1.42674 | 12 | 6  | 6  | 0         | 0.97266803 | KCNJ18   | C17orf51  |   |
| chr17 | +(21317706..21318437) | 731  | 0.00387 | 16 | 7  | 9  | 0.125     | 0.00042755 | KCNJ18   | C17orf51  |   |
| chr17 | +(21318947..21319666) | 719  | 0.04228 | 14 | 9  | 5  | 0.2857143 | 0.00981533 | KCNJ18   | C17orf51  |   |
| chr17 | +(26955241..26955748) | 507  | 3.12167 | 6  | 4  | 2  | 0.3333333 | 0.067      | SGK494   | KIAA0100  |   |
| chr17 | +(27075295..27076044) | 749  | 0.32584 | 17 | 10 | 7  | 0.1764706 | 0.00314259 | TRAF4    | C17orf63  |   |
| chr17 | +(27208141..27208656) | 515  | 1.42674 | 13 | 7  | 6  | 0.0769231 | 0.97724986 | MIR144   | FLOT2     |   |
| chr17 | +(27208779..27209297) | 518  | 2.28029 | 12 | 6  | 6  | 0         | 0.00197388 | MIR144   | FLOT2     |   |
| chr17 | +(27228085..27228673) | 588  | 0.70612 | 12 | 7  | 5  | 0.1666667 | 0.59622945 | FLOT2    | DHRS13    |   |
| chr17 | +(27381221..27381873) | 652  | 0.70612 | 11 | 5  | 6  | 0.0909091 | 0.00308495 | PIPOX    | MYO18A    | v |
| chr17 | +(27407598..27408475) | 877  | 0.00211 | 18 | 10 | 8  | 0.1111111 | 0.00223263 | PIPOX    | MYO18A    | v |
| chr17 | +(27419579..27420175) | 596  | 0.70612 | 9  | 6  | 3  | 0.3333333 | 0.012      | PIPOX    | MYO18A    | v |
| chr17 | +(27426319..27427083) | 764  | 0.04228 | 12 | 7  | 5  | 0.1666667 | 0.00224163 | PIPOX    | MYO18A    | v |
| chr17 | +(27930103..27930803) | 700  | 0.09029 | 11 | 6  | 5  | 0.0909091 | 0.00308495 | ANKRD13B | CORO6     |   |
| chr17 | +(28326528..28327133) | 605  | 3.12167 | 10 | 4  | 6  | 0.2       | 0.033      | EFCAB5   | CCDC55    |   |
| chr17 | +(28506178..28506685) | 507  | 3.12167 | 15 | 6  | 9  | 0.2       | 0.00335832 | MIR3184  | SLC6A4    |   |
| chr17 | +(28549349..28550049) | 700  | 0.32584 | 13 | 4  | 9  | 0.3846154 | 0.001      | MIR3184  | SLC6A4    |   |



|       |                       |      |         |    |    |    |           |            |              |              |
|-------|-----------------------|------|---------|----|----|----|-----------|------------|--------------|--------------|
| chr17 | +(28562914..28563426) | 512  | 1.42674 | 7  | 3  | 4  | 0.1428571 | 0.029      | MIR3184      | SLC6A4       |
| chr17 | +(29557407..29557912) | 505  | 3.12167 | 9  | 4  | 5  | 0.1111111 | 0.008      | NF1          | OMG          |
| chr17 | +(29631868..29632389) | 521  | 2.93322 | 31 | 13 | 18 | 0.1612903 | 0.00411951 | OMG          | EVI2B        |
| chr17 | +(30266911..30267604) | 693  | 0.11087 | 44 | 17 | 27 | 0.2272727 | 0.01210858 | SUZ12        | LRRC37B      |
| chr17 | +(30351690..30352193) | 503  | 3.12167 | 16 | 6  | 10 | 0.25      | 0.00240046 | LRRC37B      | SH3GL1P1     |
| chr17 | +(30354137..30355405) | 1268 | 0.10809 | 42 | 27 | 15 | 0.2857143 | 0.83753418 | LRRC37B      | SH3GL1P1     |
| chr17 | +(30362335..30362856) | 521  | 0.32584 | 18 | 12 | 6  | 0.3333333 | 0.00247894 | LRRC37B      | SH3GL1P1     |
| chr17 | +(30421564..30422258) | 694  | 0.04228 | 38 | 25 | 13 | 0.3157895 | 0.00607612 | SH3GL1P1     | RHOT1        |
| chr17 | +(30519985..30520558) | 573  | 0.32584 | 13 | 7  | 6  | 0.0769231 | 0.0013499  | ARGFXP2      | RHBDL3       |
| chr17 | +(30824672..30825863) | 1191 | 0.32584 | 16 | 6  | 10 | 0.25      | 0.02544691 | CDK5R1       | MYO1D        |
| chr17 | +(32924674..32925374) | 700  | 0.32584 | 10 | 4  | 6  | 0.2       | 0.129      | TMEM132E     | CCT6B        |
| chr17 | +(33806126..33806650) | 524  | 3.12167 | 7  | 4  | 3  | 0.1428571 | 0.029      | SLFN13       | SLFN12L      |
| chr17 | +(34149466..34149981) | 515  | 1.42674 | 11 | 4  | 7  | 0.2727273 | 0.979      | TAF15        | C17orf66     |
| chr17 | +(34417275..34417853) | 578  | 3.12167 | 10 | 6  | 4  | 0.2       | 0.129      | CCL18        | CCL3         |
| chr17 | +(34584287..34584845) | 558  | 0.32584 | 11 | 4  | 7  | 0.2727273 | 0.003      | CCL4L2_dup1  | TBC1D3C_dup1 |
| chr17 | +(34624469..34625106) | 637  | 1.42674 | 10 | 4  | 6  | 0.2       | 0.005      | TBC1D3C_dup1 | CCL3L3_dup2  |
| chr17 | +(34625369..34625880) | 511  | 2.0662  | 32 | 10 | 22 | 0.375     | 0.00014824 | TBC1D3C_dup1 | CCL3L3_dup2  |
| chr17 | +(35878683..35879253) | 570  | 0.17344 | 11 | 6  | 5  | 0.0909091 | 0.00308495 | DUSP14       | SYNRG        |
| chr17 | +(36635536..36636062) | 526  | 3.12167 | 17 | 10 | 7  | 0.1764706 | 0.72090768 | ARHGAP23     | SRCIN1       |
| chr17 | +(36909111..36909962) | 851  | 0.00024 | 22 | 15 | 7  | 0.3636364 | 0.00410387 | PSMB3        | PIP4K2B      |
| chr17 | +(36922697..36923202) | 505  | 1.42674 | 7  | 4  | 3  | 0.1428571 | 0.029      | PSMB3        | PIP4K2B      |
| chr17 | +(36942453..36943153) | 700  | 0.70612 | 9  | 6  | 3  | 0.3333333 | 0.012      | PSMB3        | PIP4K2B      |
| chr17 | +(37070987..37071935) | 948  | 0.04228 | 22 | 7  | 15 | 0.3636364 | 0.00018558 | LASP1        | FBXO47       |
| chr17 | +(37110964..37111475) | 511  | 3.12167 | 8  | 5  | 3  | 0.25      | 0.018      | LASP1        | FBXO47       |
| chr17 | +(37195602..37196136) | 534  | 0.70612 | 13 | 6  | 7  | 0.0769231 | 0.00332094 | FLJ43826     | LOC100131347 |
| chr17 | +(37221789..37222350) | 561  | 0.32584 | 9  | 5  | 4  | 0.1111111 | 0.008      | LOC100131347 | PLXDC1       |
| chr17 | +(37565973..37566499) | 526  | 0.70612 | 9  | 4  | 5  | 0.1111111 | 0.008      | FBXL20       | MED1         |
| chr17 | +(37818007..37818933) | 926  | 0.32584 | 17 | 9  | 8  | 0.0588235 | 0.000266   | STARD3       | TCAP         |
| chr17 | +(37872854..37873554) | 700  | 3.12167 | 9  | 6  | 3  | 0.3333333 | 0.988      | ERBB2        | C17orf37     |
| chr17 | +(38100503..38101078) | 575  | 1.42674 | 7  | 4  | 3  | 0.1428571 | 0.029      | LOC728129    | GSDMA        |
| chr17 | +(38129549..38130155) | 606  | 1.42674 | 13 | 6  | 7  | 0.0769231 | 0.97724986 | GSDMA        | PSMD3        |
| chr17 | +(38307131..38307679) | 548  | 0.32584 | 9  | 6  | 3  | 0.3333333 | 0.012      | CASC3        | RAPGEFL1     |
| chr17 | +(38402699..38403373) | 674  | 0.32584 | 9  | 5  | 4  | 0.1111111 | 0.008      | WIPF2        | CDC6         |
| chr17 | +(38487413..38488007) | 594  | 3.12167 | 9  | 6  | 3  | 0.3333333 | 0.81       | RARA         | GJD3         |

|       |                       |      |         |    |    |    |           |            |              |              |   |
|-------|-----------------------|------|---------|----|----|----|-----------|------------|--------------|--------------|---|
| chr17 | +(38504476..38505027) | 551  | 0.70612 | 9  | 4  | 5  | 0.1111111 | 0.056      | RARA         | GJD3         |   |
| chr17 | +(38567444..38567957) | 513  | 3.12167 | 7  | 3  | 4  | 0.1428571 | 0.029      | GJD3         | TOP2A        | v |
| chr17 | +(38643234..38643743) | 509  | 1.42674 | 15 | 6  | 9  | 0.2       | 0.03854994 | IGFBP4       | TNS4         |   |
| chr17 | +(39305223..39305758) | 535  | 3.12167 | 9  | 4  | 5  | 0.1111111 | 0.095      | KRTAP4-12    | KRTAP4-5     |   |
| chr17 | +(39766417..39767106) | 689  | 1.42674 | 9  | 6  | 3  | 0.3333333 | 0.274      | KRT14        | KRT16        |   |
| chr17 | +(39768068..39768854) | 786  | 0.32584 | 30 | 10 | 20 | 0.3333333 | 0.00160122 | KRT14        | KRT16        |   |
| chr17 | +(39776627..39777723) | 1096 | 0.00438 | 35 | 24 | 11 | 0.3714286 | 0.02750442 | KRT16        | KRT17        |   |
| chr17 | +(39913496..39913998) | 502  | 3.12167 | 6  | 3  | 3  | 0         | 0.05       | HAP1         | JUP          | v |
| chr17 | +(40125206..40125906) | 700  | 3.12167 | 9  | 3  | 6  | 0.3333333 | 0.012      | CNP          | DNAJC7       |   |
| chr17 | +(40330599..40331281) | 682  | 0.70612 | 8  | 4  | 4  | 0         | 0.014      | RAB5C        | KCNH4        |   |
| chr17 | +(40452762..40453314) | 552  | 0.70612 | 8  | 4  | 4  | 0         | 0.014      | STAT5A       | STAT3        |   |
| chr17 | +(40725063..40725581) | 518  | 1.42674 | 9  | 4  | 5  | 0.1111111 | 0.056      | MLX          | PSMC3IP      |   |
| chr17 | +(41208877..41209444) | 567  | 0.32584 | 16 | 11 | 5  | 0.375     | 0.02370919 | RND2         | BRCA1        |   |
| chr17 | +(41400071..41400876) | 805  | 2.6E-10 | 81 | 37 | 44 | 0.0864198 | 9.2586E-07 | TMEM106A     | LOC100130581 |   |
| chr17 | +(41464567..41465071) | 504  | 1.42674 | 11 | 7  | 4  | 0.2727273 | 0.003      | TMEM106A     | LOC100130581 |   |
| chr17 | +(41465988..41466509) | 521  | 0.32584 | 25 | 17 | 8  | 0.36      | 0.67940706 | TMEM106A     | LOC100130581 |   |
| chr17 | +(41477242..41478409) | 1167 | 1.42674 | 15 | 5  | 10 | 0.3333333 | 0.27014569 | ARL4D        | MIR2117      |   |
| chr17 | +(42056081..42056781) | 700  | 0.17344 | 10 | 4  | 6  | 0.2       | 0.005      | PPY          | PYY          |   |
| chr17 | +(42090083..42090688) | 605  | 0.09029 | 18 | 10 | 8  | 0.1111111 | 0.00642562 | NAGS         | TMEM101      |   |
| chr17 | +(42169429..42170308) | 879  | 1.42674 | 14 | 5  | 9  | 0.2857143 | 0.0020741  | G6PC3        | HDAC5        |   |
| chr17 | +(42273495..42274000) | 505  | 3.12167 | 6  | 3  | 3  | 0         | 0.05       | TMUB2        | ATXN7L3      |   |
| chr17 | +(42325374..42326074) | 700  | 0.32584 | 13 | 8  | 5  | 0.2307692 | 0.0017074  | UBTF         | SLC4A1       |   |
| chr17 | +(42391485..42392130) | 645  | 3.12167 | 6  | 4  | 2  | 0.3333333 | 0.067      | RUNDC3A      | SLC25A39     |   |
| chr17 | +(42397557..42398092) | 535  | 3.12167 | 9  | 6  | 3  | 0.3333333 | 0.548      | RUNDC3A      | SLC25A39     |   |
| chr17 | +(42422887..42423709) | 822  | 0.01033 | 16 | 6  | 10 | 0.25      | 0.02544691 | GRN          | FAM171A2     |   |
| chr17 | +(42475177..42475703) | 526  | 3.12167 | 9  | 3  | 6  | 0.3333333 | 0.024      | ITGA2B       | GPATCH8      |   |
| chr17 | +(42526177..42526877) | 700  | 3.12167 | 9  | 3  | 6  | 0.3333333 | 0.988      | ITGA2B       | GPATCH8      |   |
| chr17 | +(42785967..42786597) | 630  | 1.42674 | 12 | 6  | 6  | 0         | 0.00197388 | CCDC43       | DBF4B        |   |
| chr17 | +(42824402..42824972) | 570  | 1.42674 | 8  | 4  | 4  | 0         | 0.014      | DBF4B        | ADAM11       |   |
| chr17 | +(42987418..42987929) | 511  | 1.42674 | 12 | 8  | 4  | 0.3333333 | 0.99671074 | CCDC103      | GFAP         |   |
| chr17 | +(42990670..42991206) | 536  | 3.12167 | 8  | 3  | 5  | 0.25      | 0.5        | CCDC103      | GFAP         |   |
| chr17 | +(43205089..43205789) | 700  | 0.09029 | 18 | 7  | 11 | 0.2222222 | 0.9997556  | NMT1         | PLCD3        |   |
| chr17 | +(43332323..43332884) | 561  | 0.17344 | 14 | 5  | 9  | 0.2857143 | 0.00313484 | LOC100133991 | C17orf46     |   |
| chr17 | +(44053155..44054233) | 1078 | 0.01781 | 25 | 12 | 13 | 0.04      | 1.1045E-05 | LOC100130148 | STH          |   |

|       |                       |      |         |    |    |    |           |            |            |              |   |
|-------|-----------------------|------|---------|----|----|----|-----------|------------|------------|--------------|---|
| chr17 | +(44376966..44377498) | 532  | 1.42674 | 12 | 8  | 4  | 0.3333333 | 0.024      | LRRC37A    | ARL17A_dup1  |   |
| chr17 | +(44590804..44591449) | 645  | 0.70612 | 14 | 7  | 7  | 0         | 0.05511153 | LRRC37A2   | ARL17A_dup2  |   |
| chr17 | +(44591957..44592630) | 673  | 1.42674 | 18 | 7  | 11 | 0.2222222 | 0.03168284 | LRRC37A2   | ARL17A_dup2  |   |
| chr17 | +(44618028..44618580) | 552  | 1.74239 | 34 | 18 | 16 | 0.0588235 | 1.0983E-05 | LRRC37A2   | ARL17A_dup2  |   |
| chr17 | +(44626268..44627468) | 1200 | 0.11087 | 51 | 28 | 23 | 0.0980392 | 0.0018882  | LRRC37A2   | ARL17A_dup2  |   |
| chr17 | +(44630536..44631232) | 696  | 0.01781 | 25 | 13 | 12 | 0.04      | 0.00967052 | LRRC37A2   | ARL17A_dup2  |   |
| chr17 | +(44632310..44632816) | 506  | 2.75008 | 24 | 11 | 13 | 0.0833333 | 0.00296175 | LRRC37A2   | ARL17A_dup2  |   |
| chr17 | +(44653431..44653936) | 505  | 2.0662  | 25 | 11 | 14 | 0.12      | 0.00012227 | LRRC37A2   | ARL17A_dup2  |   |
| chr17 | +(44701438..44702058) | 620  | 0.04228 | 21 | 13 | 8  | 0.2380952 | 0.00019363 | NSFP1_dup2 | WNT3         |   |
| chr17 | +(44771317..44771828) | 511  | 3.12167 | 16 | 6  | 10 | 0.25      | 0.03259822 | NSFP1_dup2 | WNT3         |   |
| chr17 | +(44781948..44782629) | 681  | 0.61533 | 26 | 14 | 12 | 0.0769231 | 0.06141133 | NSFP1_dup2 | WNT3         |   |
| chr17 | +(45265775..45266834) | 1059 | 0.01781 | 32 | 10 | 22 | 0.375     | 0.46759709 | RPRML      | CDC27        |   |
| chr17 | +(45470168..45470833) | 665  | 3.12167 | 6  | 2  | 4  | 0.3333333 | 0.067      | C17orf57   | LOC100272146 |   |
| chr17 | +(47916982..47917613) | 631  | 0.70612 | 9  | 3  | 6  | 0.3333333 | 0.012      | MYST2      | TAC4         |   |
| chr17 | +(47985880..47986503) | 623  | 3.12167 | 10 | 6  | 4  | 0.2       | 0.762      | TAC4       | DLX4         |   |
| chr17 | +(48185299..48185889) | 590  | 3.12167 | 6  | 4  | 2  | 0.3333333 | 0.067      | PDK2       | SAMD14       |   |
| chr17 | +(48620008..48620690) | 682  | 0.70612 | 8  | 3  | 5  | 0.25      | 0.018      | EPN3       | SPATA20      |   |
| chr17 | +(48916802..48917324) | 522  | 3.12167 | 11 | 4  | 7  | 0.2727273 | 0.158      | WFIKKN2    | TOB1         |   |
| chr17 | +(48922871..48923547) | 676  | 0.32584 | 9  | 6  | 3  | 0.3333333 | 0.012      | WFIKKN2    | TOB1         |   |
| chr17 | +(49072476..49073068) | 592  | 1.42674 | 7  | 4  | 3  | 0.1428571 | 0.029      | TOB1       | SPAG9        | v |
| chr17 | +(49365355..49365941) | 586  | 1.42674 | 13 | 7  | 6  | 0.0769231 | 0.19568297 | UTP18      | CA10         |   |
| chr17 | +(51710167..51710747) | 580  | 1.42674 | 7  | 3  | 4  | 0.1428571 | 0.029      | CA10       | KIF2B        |   |
| chr17 | +(51900742..51901306) | 564  | 0.09029 | 12 | 6  | 6  | 0         | 0.00197388 | KIF2B      | TOM1L1       |   |
| chr17 | +(54921210..54921882) | 672  | 0.17344 | 14 | 7  | 7  | 0         | 0.00202049 | DGKE       | MTVR2        |   |
| chr17 | +(55074076..55074708) | 632  | 3.12167 | 6  | 2  | 4  | 0.3333333 | 0.067      | SCPEP1     | RNF126P1     |   |
| chr17 | +(55439055..55439755) | 700  | 0.17344 | 10 | 7  | 3  | 0.4       | 0.008      | MSI2       | MRPS23       |   |
| chr17 | +(55511298..55511998) | 700  | 0.17344 | 10 | 3  | 7  | 0.4       | 0.008      | MSI2       | MRPS23       |   |
| chr17 | +(55739797..55740730) | 933  | 1.42674 | 13 | 6  | 7  | 0.0769231 | 0.0013499  | MSI2       | MRPS23       |   |
| chr17 | +(55856394..55857094) | 700  | 0.04228 | 12 | 5  | 7  | 0.1666667 | 0.00224163 | MSI2       | MRPS23       |   |
| chr17 | +(56083640..56084150) | 510  | 1.42674 | 10 | 7  | 3  | 0.4       | 0.058      | VEZF1      | SRSF1        |   |
| chr17 | +(56383214..56383913) | 699  | 1.42674 | 11 | 6  | 5  | 0.0909091 | 0.76739559 | MPO        | BZRAP1       |   |
| chr17 | +(56676604..56677187) | 583  | 1.42674 | 10 | 4  | 6  | 0.2       | 0.005      | C17orf47   | TEX14        | v |
| chr17 | +(57138236..57138746) | 510  | 3.12167 | 6  | 3  | 3  | 0         | 0.05       | PPM1E      | TRIM37       |   |
| chr17 | +(58937086..58937744) | 658  | 3.12167 | 6  | 4  | 2  | 0.3333333 | 0.067      | BCAS3      | TBX2         |   |

|       |                       |      |         |    |    |    |           |            |                |              |
|-------|-----------------------|------|---------|----|----|----|-----------|------------|----------------|--------------|
| chr17 | +(59457036..59457736) | 700  | 0.04228 | 15 | 7  | 8  | 0.0666667 | 0.20894348 | BCAS3          | TBX2         |
| chr17 | +(59520958..59521485) | 527  | 0.70612 | 8  | 4  | 4  | 0         | 0.014      | C17orf82       | TBX4         |
| chr17 | +(59560490..59561024) | 534  | 3.12167 | 6  | 2  | 4  | 0.3333333 | 0.067      | TBX4           | NACA2        |
| chr17 | +(59562717..59563433) | 716  | 0.32584 | 13 | 9  | 4  | 0.3846154 | 0.001      | TBX4           | NACA2        |
| chr17 | +(60348301..60348810) | 509  | 3.12167 | 10 | 7  | 3  | 0.4       | 0.058      | MED13          | TBC1D3P2     |
| chr17 | +(60362239..60363140) | 901  | 0.70612 | 29 | 17 | 12 | 0.1724138 | 0.13414294 | TBC1D3P2       | EFCAB3       |
| chr17 | +(60363154..60363655) | 501  | 2.28029 | 22 | 8  | 14 | 0.2727273 | 0.07588612 | TBC1D3P2       | EFCAB3       |
| chr17 | +(60365666..60366207) | 541  | 1.42674 | 12 | 7  | 5  | 0.1666667 | 0.18587565 | TBC1D3P2       | EFCAB3       |
| chr17 | +(60368010..60368715) | 705  | 0.1736  | 73 | 42 | 31 | 0.1506849 | 1.1553E-11 | TBC1D3P2       | EFCAB3       |
| chr17 | +(60629190..60630226) | 1036 | 0.00438 | 52 | 26 | 26 | 0         | 0.04437669 | TLK2           | MRC2         |
| chr17 | +(60630767..60631382) | 615  | 3.12167 | 7  | 3  | 4  | 0.1428571 | 0.029      | TLK2           | MRC2         |
| chr17 | +(60768282..60768851) | 569  | 0.70612 | 8  | 3  | 5  | 0.25      | 0.018      | MRC2           | 40978        |
| chr17 | +(60793353..60794549) | 1196 | 1.42674 | 13 | 6  | 7  | 0.0769231 | 0.0013499  | MRC2           | 40978        |
| chr17 | +(60794584..60795279) | 695  | 1.42674 | 9  | 6  | 3  | 0.3333333 | 0.012      | MRC2           | 40978        |
| chr17 | +(61575679..61576595) | 916  | 0.04228 | 23 | 11 | 12 | 0.0434783 | 2.4325E-05 | ACE            | KCNH6        |
| chr17 | +(61627907..61628557) | 650  | 1.42674 | 8  | 3  | 5  | 0.25      | 0.018      | DCAF7          | TACO1        |
| chr17 | +(61986780..61987293) | 513  | 3.12167 | 9  | 3  | 6  | 0.3333333 | 0.012      | CSH1           | CSHL1        |
| chr17 | +(61987425..61988100) | 675  | 0.09029 | 20 | 9  | 11 | 0.1       | 0.15252943 | CSH1           | CSHL1        |
| chr17 | +(62033399..62034009) | 610  | 3.12167 | 9  | 3  | 6  | 0.3333333 | 0.988      | CD79B          | SCN4A        |
| chr17 | +(62793421..62793987) | 566  | 0.70612 | 14 | 8  | 6  | 0.1428571 | 0.99508836 | LOC146880      | PLEKHM1P     |
| chr17 | +(62810860..62811634) | 774  | 0.32584 | 20 | 13 | 7  | 0.3       | 0.02165575 | LOC146880      | PLEKHM1P     |
| chr17 | +(62893074..62893608) | 534  | 1.42674 | 8  | 5  | 3  | 0.25      | 0.071      | MIR4315-2_dup2 | LRRC37A3     |
| chr17 | +(62952468..62953069) | 601  | 0.70612 | 9  | 6  | 3  | 0.3333333 | 0.012      | LRRC37A3       | AMZ2P1       |
| chr17 | +(63010660..63011201) | 541  | 3.12167 | 9  | 5  | 4  | 0.1111111 | 0.857      | AMZ2P1         | GNA13        |
| chr17 | +(64750251..64751452) | 1201 | 0.09029 | 19 | 11 | 8  | 0.1578947 | 0.99986003 | PRKCA          | MIR634       |
| chr17 | +(64837999..64838585) | 586  | 1.42674 | 7  | 4  | 3  | 0.1428571 | 0.029      | MIR634         | CACNG5       |
| chr17 | +(64876534..64877073) | 539  | 0.70612 | 10 | 7  | 3  | 0.4       | 0.017      | CACNG5         | CACNG4       |
| chr17 | +(64949519..64950138) | 619  | 3.12167 | 6  | 4  | 2  | 0.3333333 | 0.067      | CACNG5         | CACNG4       |
| chr17 | +(65131988..65132499) | 511  | 3.12167 | 10 | 6  | 4  | 0.2       | 0.033      | CACNG1         | HELZ         |
| chr17 | +(65490643..65491220) | 577  | 3.12167 | 9  | 3  | 6  | 0.3333333 | 0.012      | PITPNC1        | NOL11        |
| chr17 | +(67260605..67261455) | 850  | 0.04228 | 21 | 12 | 9  | 0.1428571 | 0.15988353 | ABCA10         | ABCA5        |
| chr17 | +(67532855..67533550) | 695  | 3.12167 | 6  | 4  | 2  | 0.3333333 | 0.067      | MAP2K6         | KCNJ16       |
| chr17 | +(67683993..67684550) | 557  | 0.17344 | 10 | 5  | 5  | 0         | 0.00451172 | MAP2K6         | KCNJ16       |
| chr17 | +(70557947..70558647) | 700  | 1.42674 | 10 | 3  | 7  | 0.4       | 0.992      | SOX9           | LOC100499467 |

|       |                       |      |         |    |    |    |           |            |          |              |
|-------|-----------------------|------|---------|----|----|----|-----------|------------|----------|--------------|
| chr17 | +(70568921..70569619) | 698  | 3.12167 | 11 | 6  | 5  | 0.0909091 | 0.00308495 | SOX9     | LOC100499467 |
| chr17 | +(71381831..71382528) | 697  | 1.42674 | 9  | 3  | 6  | 0.3333333 | 0.131      | CDC42EP4 | SDK2         |
| chr17 | +(71397838..71398409) | 571  | 0.01033 | 14 | 9  | 5  | 0.2857143 | 0.0013499  | CDC42EP4 | SDK2         |
| chr17 | +(71417910..71418437) | 527  | 0.70612 | 12 | 7  | 5  | 0.1666667 | 0.00224163 | CDC42EP4 | SDK2         |
| chr17 | +(71702433..71702973) | 540  | 3.12167 | 6  | 2  | 4  | 0.3333333 | 0.067      | SDK2     | C17orf54     |
| chr17 | +(72217748..72218448) | 700  | 0.17344 | 14 | 5  | 9  | 0.2857143 | 0.00981533 | TTYH2    | DNAI2        |
| chr17 | +(72239718..72240678) | 960  | 1.42674 | 14 | 7  | 7  | 0         | 0.91014375 | TTYH2    | DNAI2        |
| chr17 | +(72310294..72311472) | 1178 | 0.09029 | 25 | 15 | 10 | 0.2       | 0.8540426  | DNAI2    | KIF19        |
| chr17 | +(72728533..72729228) | 695  | 3.12167 | 7  | 3  | 4  | 0.1428571 | 0.2        | CD300LF  | MIR3615      |
| chr17 | +(72729848..72730485) | 637  | 1.42674 | 8  | 3  | 5  | 0.25      | 0.286      | CD300LF  | MIR3615      |
| chr17 | +(72769015..72769516) | 501  | 0.70612 | 8  | 4  | 4  | 0         | 0.014      | SLC9A3R1 | NAT9         |
| chr17 | +(72853506..72854013) | 507  | 0.70612 | 8  | 3  | 5  | 0.25      | 0.018      | TMEM104  | GRIN2C       |
| chr17 | +(72944232..72944932) | 700  | 0.04228 | 12 | 6  | 6  | 0         | 0.00197388 | OTOP3    | C17orf28     |
| chr17 | +(72947604..72948132) | 528  | 3.12167 | 6  | 3  | 3  | 0         | 0.05       | OTOP3    | C17orf28     |
| chr17 | +(73016757..73017265) | 508  | 3.12167 | 12 | 6  | 6  | 0         | 0.05465729 | ICT1     | ATP5H        |
| chr17 | +(73671067..73671593) | 526  | 3.12167 | 11 | 5  | 6  | 0.0909091 | 0.81934478 | SAP30BP  | ITGB4        |
| chr17 | +(73700273..73701645) | 1372 | 3.12167 | 15 | 6  | 9  | 0.2       | 0.96145006 | SAP30BP  | ITGB4        |
| chr17 | +(73725955..73727140) | 1185 | 0.17344 | 20 | 13 | 7  | 0.3       | 0.00627746 | ITGB4    | GALK1        |
| chr17 | +(73745948..73746648) | 700  | 0.70612 | 13 | 5  | 8  | 0.2307692 | 0.97148006 | ITGB4    | GALK1        |
| chr17 | +(74077761..74078272) | 511  | 3.12167 | 6  | 4  | 2  | 0.3333333 | 0.067      | ZACN     | EXOC7        |
| chr17 | +(74274980..74275557) | 577  | 3.12167 | 8  | 5  | 3  | 0.25      | 0.018      | FAM100B  | QRICH2       |
| chr17 | +(74737880..74738534) | 654  | 3.12167 | 7  | 4  | 3  | 0.1428571 | 0.029      | MFSD11   | MGAT5B       |
| chr17 | +(74836236..74836805) | 569  | 3.12167 | 6  | 3  | 3  | 0         | 0.05       | MFSD11   | MGAT5B       |
| chr17 | +(74909043..74909743) | 700  | 3.12167 | 9  | 3  | 6  | 0.3333333 | 0.012      | MGAT5B   | C17orf86     |
| chr17 | +(74958050..74958580) | 530  | 3.12167 | 6  | 3  | 3  | 0         | 0.05       | MGAT5B   | C17orf86     |
| chr17 | +(75201393..75201925) | 532  | 0.32584 | 12 | 5  | 7  | 0.1666667 | 0.18587565 | SEC14L1  | 41161        |
| chr17 | +(75398971..75399539) | 568  | 0.04228 | 12 | 7  | 5  | 0.1666667 | 0.00224163 | MIR4316  | FLJ45079     |
| chr17 | +(75477306..75477839) | 533  | 1.42674 | 11 | 4  | 7  | 0.2727273 | 0.394      | MIR4316  | FLJ45079     |
| chr17 | +(75596925..75597430) | 505  | 3.12167 | 6  | 4  | 2  | 0.3333333 | 0.067      | MIR4316  | FLJ45079     |
| chr17 | +(75690478..75691027) | 549  | 0.70612 | 8  | 5  | 3  | 0.25      | 0.018      | MIR4316  | FLJ45079     |
| chr17 | +(75869750..75870450) | 700  | 0.17344 | 12 | 8  | 4  | 0.3333333 | 0.99671074 | MIR4316  | FLJ45079     |
| chr17 | +(75877638..75878207) | 569  | 0.70612 | 10 | 7  | 3  | 0.4       | 0.008      | MIR4316  | FLJ45079     |
| chr17 | +(76045769..76046286) | 517  | 0.32584 | 9  | 6  | 3  | 0.3333333 | 0.012      | TNRC6C   | TMC6         |
| chr17 | +(76093367..76094067) | 700  | 0.32584 | 9  | 3  | 6  | 0.3333333 | 0.012      | TNRC6C   | TMC6         |

|       |                       |      |         |    |    |   |           |            |           |              |
|-------|-----------------------|------|---------|----|----|---|-----------|------------|-----------|--------------|
| chr17 | +(76567261..76567961) | 700  | 0.09029 | 11 | 5  | 6 | 0.0909091 | 0.00308495 | PGS1      | DNAH17       |
| chr17 | +(77079404..77080076) | 672  | 0.17344 | 11 | 4  | 7 | 0.2727273 | 0.003      | ENGASE    | RBFOX3       |
| chr17 | +(77103736..77104255) | 519  | 1.42674 | 7  | 4  | 3 | 0.1428571 | 0.029      | ENGASE    | RBFOX3       |
| chr17 | +(77140849..77141549) | 700  | 0.01781 | 15 | 9  | 6 | 0.2       | 0.00073136 | ENGASE    | RBFOX3       |
| chr17 | +(77186043..77186654) | 611  | 3.12167 | 10 | 3  | 7 | 0.4       | 0.192      | ENGASE    | RBFOX3       |
| chr17 | +(77345272..77345908) | 636  | 3.12167 | 6  | 3  | 3 | 0         | 0.05       | ENGASE    | RBFOX3       |
| chr17 | +(77452549..77453102) | 553  | 3.12167 | 6  | 4  | 2 | 0.3333333 | 0.067      | ENGASE    | RBFOX3       |
| chr17 | +(77537725..77538349) | 624  | 0.70612 | 8  | 5  | 3 | 0.25      | 0.018      | RBFOX3    | ENPP7        |
| chr17 | +(77710472..77711051) | 579  | 0.17344 | 11 | 4  | 7 | 0.2727273 | 0.003      | ENPP7     | CBX2         |
| chr17 | +(78117814..78118378) | 564  | 3.12167 | 6  | 3  | 3 | 0         | 0.05       | GAA       | EIF4A3       |
| chr17 | +(78190251..78190941) | 690  | 0.70612 | 13 | 8  | 5 | 0.2307692 | 0.76789284 | CARD14    | SGSH         |
| chr17 | +(78228197..78228748) | 551  | 1.42674 | 7  | 3  | 4 | 0.1428571 | 0.029      | SLC26A11  | RNF213       |
| chr17 | +(78231373..78232073) | 700  | 0.17344 | 10 | 6  | 4 | 0.2       | 0.005      | SLC26A11  | RNF213       |
| chr17 | +(78361053..78361657) | 604  | 3.12167 | 6  | 4  | 2 | 0.3333333 | 0.067      | RNF213    | LOC100294362 |
| chr17 | +(78403449..78403962) | 513  | 3.12167 | 6  | 3  | 3 | 0         | 0.05       | FLJ35220  | NPTX1        |
| chr17 | +(78636829..78638443) | 1614 | 0.32584 | 23 | 16 | 7 | 0.3913043 | 0.68000299 | RPTOR     | CHMP6        |
| chr17 | +(78809759..78810459) | 700  | 0.32584 | 13 | 4  | 9 | 0.3846154 | 0.999      | RPTOR     | CHMP6        |
| chr17 | +(78828893..78829582) | 689  | 0.70612 | 10 | 3  | 7 | 0.4       | 0.742      | RPTOR     | CHMP6        |
| chr17 | +(79029965..79031200) | 1235 | 0.32584 | 18 | 12 | 6 | 0.3333333 | 0.99962648 | BAIAP2    | AATK         |
| chr17 | +(79041793..79042402) | 609  | 3.12167 | 6  | 2  | 4 | 0.3333333 | 0.067      | BAIAP2    | AATK         |
| chr17 | +(79063707..79064407) | 700  | 3.12167 | 11 | 5  | 6 | 0.0909091 | 0.99691505 | BAIAP2    | AATK         |
| chr17 | +(79085659..79086359) | 700  | 3.12167 | 10 | 6  | 4 | 0.2       | 0.995      | BAIAP2    | AATK         |
| chr17 | +(79098295..79098828) | 533  | 3.12167 | 7  | 3  | 4 | 0.1428571 | 0.029      | BAIAP2    | AATK         |
| chr17 | +(79156834..79157475) | 641  | 3.12167 | 6  | 3  | 3 | 0         | 0.05       | LOC388428 | AZI1         |
| chr17 | +(79238943..79239729) | 786  | 0.70612 | 14 | 6  | 8 | 0.1428571 | 0.00097289 | C17orf89  | SLC38A10     |
| chr17 | +(79259772..79260471) | 699  | 0.17344 | 14 | 9  | 5 | 0.2857143 | 0.0013499  | C17orf89  | SLC38A10     |
| chr17 | +(79636585..79637217) | 632  | 1.42674 | 7  | 3  | 4 | 0.1428571 | 0.029      | CCDC137   | ARL16        |
| chr17 | +(80006699..80007225) | 526  | 0.01033 | 16 | 7  | 9 | 0.125     | 0.00042755 | DCXR      | RFNG         |
| chr17 | +(80085534..80086234) | 700  | 0.09029 | 11 | 4  | 7 | 0.2727273 | 0.003      | FASN      | CCDC57       |
| chr17 | +(80120549..80121102) | 553  | 0.32584 | 13 | 4  | 9 | 0.3846154 | 0.001      | FASN      | CCDC57       |
| chr17 | +(80157636..80158159) | 523  | 0.70612 | 8  | 5  | 3 | 0.25      | 0.018      | FASN      | CCDC57       |
| chr17 | +(80212959..80213462) | 503  | 1.42674 | 9  | 4  | 5 | 0.1111111 | 0.016      | SLC16A3   | CSNK1D       |
| chr17 | +(80255465..80256045) | 580  | 0.32584 | 9  | 5  | 4 | 0.1111111 | 0.008      | CSNK1D    | CD7          |
| chr17 | +(80280104..80280756) | 652  | 3.12167 | 9  | 6  | 3 | 0.3333333 | 0.726      | CD7       | SECTM1       |

|       |                       |     |         |    |    |    |           |            |           |              |
|-------|-----------------------|-----|---------|----|----|----|-----------|------------|-----------|--------------|
| chr17 | +(80287788..80288398) | 610 | 3.12167 | 6  | 2  | 4  | 0.3333333 | 0.067      | CD7       | SECTM1       |
| chr17 | +(80383037..80383728) | 691 | 0.17344 | 10 | 7  | 3  | 0.4       | 0.008      | HEXDC     | C17orf62     |
| chr17 | +(80523794..80524437) | 643 | 3.12167 | 6  | 2  | 4  | 0.3333333 | 0.067      | FOXK2     | WDR45L       |
| chr17 | +(80559129..80559834) | 705 | 0.04228 | 14 | 8  | 6  | 0.1428571 | 0.0140929  | FOXK2     | WDR45L       |
| chr17 | +(80789070..80789649) | 579 | 0.70612 | 9  | 6  | 3  | 0.3333333 | 0.012      | TBCD      | ZNF750       |
| chr17 | +(80962553..80963253) | 700 | 0.00211 | 18 | 6  | 12 | 0.3333333 | 0.00037352 | ZNF750    | B3GNTL1      |
| chr18 | +(346080..347041)     | 961 | 0.97814 | 14 | 6  | 8  | 0.1428571 | 0.0983528  | THOC1     | COLEC12      |
| chr18 | +(2752225..2752745)   | 520 | 2.05641 | 10 | 3  | 7  | 0.4       | 0.258      | SMCHD1    | EMILIN2      |
| chr18 | +(2945583..2946241)   | 658 | 0.08524 | 21 | 11 | 10 | 0.047619  | 0.6109023  | EMILIN2   | LPIN2        |
| chr18 | +(8337491..8338124)   | 633 | 0.01812 | 12 | 7  | 5  | 0.1666667 | 0.00224163 | PTPRM     | LOC100192426 |
| chr18 | +(9524390..9525058)   | 668 | 0.41893 | 10 | 6  | 4  | 0.2       | 0.005      | RALBP1    | PPP4R1       |
| chr18 | +(9588300..9588968)   | 668 | 0.97814 | 8  | 4  | 4  | 0         | 0.1        | RALBP1    | PPP4R1       |
| chr18 | +(10533394..10533901) | 507 | 2.05641 | 11 | 7  | 4  | 0.2727273 | 0.003      | NAPG      | FAM38B       |
| chr18 | +(11533529..11534229) | 700 | 0.0091  | 13 | 9  | 4  | 0.3846154 | 0.001      | FAM38B    | GNAL         |
| chr18 | +(11753621..11754149) | 528 | 0.97814 | 8  | 5  | 3  | 0.25      | 0.018      | GNAL      | CHMP1B       |
| chr18 | +(12005492..12006192) | 700 | 2.05641 | 9  | 6  | 3  | 0.3333333 | 0.012      | IMPA2     | CIDEA        |
| chr18 | +(12075648..12076153) | 505 | 2.05641 | 16 | 7  | 9  | 0.125     | 0.05043048 | IMPA2     | CIDEA        |
| chr18 | +(12340012..12340611) | 599 | 2.05641 | 6  | 4  | 2  | 0.3333333 | 0.067      | TUBB6     | AFG3L2       |
| chr18 | +(12422932..12423496) | 564 | 2.05641 | 6  | 2  | 4  | 0.3333333 | 0.067      | SLMO1     | SPIRE1       |
| chr18 | +(13613407..13614107) | 700 | 0.03999 | 11 | 4  | 7  | 0.2727273 | 0.003      | C18orf1   | C18orf19     |
| chr18 | +(14522003..14522604) | 601 | 0.0091  | 43 | 27 | 16 | 0.255814  | 7.5505E-08 | CXADRP3   | POTEC        |
| chr18 | +(14523236..14523941) | 705 | 0.00536 | 71 | 46 | 25 | 0.2957746 | 1.6418E-11 | CXADRP3   | POTEC        |
| chr18 | +(14537481..14537987) | 506 | 1.49469 | 31 | 16 | 15 | 0.0322581 | 0.00133156 | CXADRP3   | POTEC        |
| chr18 | +(14798951..14799458) | 507 | 3.31878 | 22 | 13 | 9  | 0.1818182 | 0.0006003  | ANKRD30B  | MIR3156-2    |
| chr18 | +(14812760..14813313) | 553 | 3.31878 | 18 | 6  | 12 | 0.3333333 | 0.00037352 | ANKRD30B  | MIR3156-2    |
| chr18 | +(14842533..14843078) | 545 | 2.05641 | 16 | 11 | 5  | 0.375     | 0.73338577 | MIR3156-2 | LOC644669    |
| chr18 | +(19995642..19996149) | 507 | 3.31878 | 22 | 8  | 14 | 0.2727273 | 0.5        | GATA6     | CTAGE1       |
| chr18 | +(20910589..20911289) | 700 | 0.08524 | 10 | 6  | 4  | 0.2       | 0.005      | CABLES1   | C18orf45     |
| chr18 | +(20981419..20982246) | 827 | 0.00054 | 16 | 8  | 8  | 0         | 0.00038877 | CABLES1   | C18orf45     |
| chr18 | +(21487383..21488068) | 685 | 0.97814 | 8  | 4  | 4  | 0         | 0.029      | LAMA3     | TTC39C       |
| chr18 | +(28721873..28722400) | 527 | 0.97814 | 11 | 5  | 6  | 0.0909091 | 0.23260441 | DSC2      | DSC1         |
| chr18 | +(32888796..32889306) | 510 | 2.05641 | 8  | 3  | 5  | 0.25      | 0.018      | ZNF271    | ZNF24        |
| chr18 | +(33077559..33078454) | 895 | 0.00807 | 16 | 8  | 8  | 0         | 0.04644598 | ZNF396    | INO80C       |
| chr18 | +(34172280..34172940) | 660 | 2.05641 | 6  | 3  | 3  | 0         | 0.05       | FHOD3     | C18orf10     |

|       |                       |      |         |     |     |    |           |            |           |           |
|-------|-----------------------|------|---------|-----|-----|----|-----------|------------|-----------|-----------|
| chr18 | +(34829704..34830302) | 598  | 0.41893 | 8   | 5   | 3  | 0.25      | 0.018      | KIAA1328  | CELF4     |
| chr18 | +(43410785..43411485) | 700  | 0.03999 | 11  | 5   | 6  | 0.0909091 | 0.00308495 | SIGLEC15  | KIAA1632  |
| chr18 | +(44435360..44435891) | 531  | 2.05641 | 9   | 6   | 3  | 0.3333333 | 0.012      | ST8SIA5   | PIAS2     |
| chr18 | +(45675156..45675856) | 700  | 0.41893 | 13  | 5   | 8  | 0.2307692 | 0.9982926  | ZBTB7C    | KIAA0427  |
| chr18 | +(45881179..45881741) | 562  | 2.05641 | 9   | 5   | 4  | 0.1111111 | 0.857      | ZBTB7C    | KIAA0427  |
| chr18 | +(46265712..46266235) | 523  | 0.41893 | 8   | 5   | 3  | 0.25      | 0.018      | KIAA0427  | SMAD7     |
| chr18 | +(46333612..46334145) | 533  | 0.08524 | 10  | 5   | 5  | 0         | 0.00451172 | KIAA0427  | SMAD7     |
| chr18 | +(46377638..46378328) | 690  | 0.97814 | 11  | 7   | 4  | 0.2727273 | 0.997      | KIAA0427  | SMAD7     |
| chr18 | +(46521898..46522502) | 604  | 2.05641 | 6   | 2   | 4  | 0.3333333 | 0.067      | SMAD7     | DYM       |
| chr18 | +(46892640..46893198) | 558  | 0.41893 | 8   | 4   | 4  | 0         | 0.014      | SMAD7     | DYM       |
| chr18 | +(47488419..47488923) | 504  | 0.41893 | 8   | 3   | 5  | 0.25      | 0.018      | SCARNA17  | MYO5B     |
| chr18 | +(48190305..48191000) | 695  | 0.00035 | 20  | 11  | 9  | 0.1       | 0.0083517  | MAPK4     | MRO       |
| chr18 | +(52601862..52602371) | 509  | 2.05641 | 8   | 4   | 4  | 0         | 0.014      | RAB27B    | CCDC68    |
| chr18 | +(55282956..55283637) | 681  | 0.97814 | 9   | 3   | 6  | 0.3333333 | 0.083      | FECH      | NARS      |
| chr18 | +(56148984..56149515) | 531  | 2.05641 | 8   | 5   | 3  | 0.25      | 0.018      | MIR122    | ALPK2     |
| chr18 | +(56587221..56587767) | 546  | 2.05641 | 13  | 8   | 5  | 0.2307692 | 0.15275354 | ZNF532    | LOC390858 |
| chr18 | +(56615132..56615636) | 504  | 2.05641 | 10  | 6   | 4  | 0.2       | 0.01       | ZNF532    | LOC390858 |
| chr18 | +(57103142..57103795) | 653  | 0.41893 | 13  | 5   | 8  | 0.2307692 | 0.27909232 | LMAN1     | CCBE1     |
| chr18 | +(60036507..60037025) | 518  | 2.05641 | 6   | 4   | 2  | 0.3333333 | 0.067      | TNFRSF11A | ZCCHC2    |
| chr18 | +(60242197..60242811) | 614  | 2.05641 | 8   | 4   | 4  | 0         | 0.443      | ZCCHC2    | PHLPP1    |
| chr18 | +(60424932..60425893) | 961  | 0.16965 | 15  | 6   | 9  | 0.2       | 0.00073136 | PHLPP1    | BCL2      |
| chr18 | +(67863402..67864240) | 838  | 0.01812 | 14  | 5   | 9  | 0.2857143 | 0.0013499  | CD226     | RTTN      |
| chr18 | +(67997104..67997636) | 532  | 2.05641 | 13  | 8   | 5  | 0.2307692 | 0.00958624 | SOCS6     | CBLN2     |
| chr18 | +(77207769..77208729) | 960  | 0.97814 | 13  | 7   | 6  | 0.0769231 | 0.0013499  | NFATC1    | CTDP1     |
| chr18 | +(77476384..77477576) | 1192 | 0.01812 | 23  | 11  | 12 | 0.0434783 | 0.96758091 | CTDP1     | KCNG2     |
| chr18 | +(77674295..77674995) | 700  | 0.08524 | 15  | 10  | 5  | 0.3333333 | 0.00109982 | KCNG2     | PQLC1     |
| chr19 | +(110605..111853)     | 1248 | 0.00123 | 186 | 111 | 75 | 0.1935484 | 7.1696E-05 | FAM138F   | OR4F17    |
| chr19 | +(1006530..1007230)   | 700  | 0.14459 | 10  | 4   | 6  | 0.2       | 0.005      | GRIN3B    | C19orf6   |
| chr19 | +(1056763..1057271)   | 508  | 2.97166 | 7   | 4   | 3  | 0.1428571 | 0.029      | ABCA7     | HMHA1     |
| chr19 | +(1065222..1065880)   | 658  | 2.97166 | 6   | 2   | 4  | 0.3333333 | 0.067      | ABCA7     | HMHA1     |
| chr19 | +(1155898..1156520)   | 622  | 2.97166 | 6   | 3   | 3  | 0         | 0.05       | GPX4      | SBNO2     |
| chr19 | +(1578350..1579018)   | 668  | 2.97166 | 6   | 3   | 3  | 0         | 0.05       | MEX3D     | MBD3      |
| chr19 | +(1617245..1617797)   | 552  | 2.97166 | 6   | 4   | 2  | 0.3333333 | 0.067      | UQCR11    | TCF3      |
| chr19 | +(1708896..1709596)   | 700  | 0.04215 | 13  | 7   | 6  | 0.0769231 | 0.01606229 | TCF3      | ONECUT3   |



|       |                       |      |         |    |   |   |           |            |          |              |   |
|-------|-----------------------|------|---------|----|---|---|-----------|------------|----------|--------------|---|
| chr19 | +(2274151..2274851)   | 700  | 2.97166 | 9  | 3 | 6 | 0.3333333 | 0.988      | OAZ1     | C19orf35     |   |
| chr19 | +(3086278..3086802)   | 524  | 2.97166 | 6  | 2 | 4 | 0.3333333 | 0.067      | AES      | GNA11        |   |
| chr19 | +(3115831..3116517)   | 686  | 0.61721 | 8  | 3 | 5 | 0.25      | 0.018      | GNA11    | GNA15        |   |
| chr19 | +(3516063..3516663)   | 600  | 1.34748 | 7  | 4 | 3 | 0.1428571 | 0.029      | FZR1     | C19orf28     |   |
| chr19 | +(3632631..3633780)   | 1149 | 0.30033 | 15 | 9 | 6 | 0.2       | 0.00073136 | C19orf29 | PIP5K1C      | v |
| chr19 | +(4353782..4354317)   | 535  | 2.97166 | 6  | 2 | 4 | 0.3333333 | 0.067      | MPND     | SH3GL1       |   |
| chr19 | +(4504791..4505491)   | 700  | 0.14459 | 11 | 4 | 7 | 0.2727273 | 0.003      | HDGFRP2  | PLIN4        |   |
| chr19 | +(4512693..4513230)   | 537  | 2.97166 | 6  | 2 | 4 | 0.3333333 | 0.067      | HDGFRP2  | PLIN4        |   |
| chr19 | +(4816079..4816648)   | 569  | 1.34748 | 8  | 4 | 4 | 0         | 0.014      | FEM1A    | TICAM1       |   |
| chr19 | +(4817080..4817589)   | 509  | 2.97166 | 12 | 4 | 8 | 0.3333333 | 0.184      | FEM1A    | TICAM1       |   |
| chr19 | +(5292031..5292665)   | 634  | 0.30033 | 9  | 6 | 3 | 0.3333333 | 0.012      | KDM4B    | PTPRS        |   |
| chr19 | +(5394635..5395138)   | 503  | 0.30033 | 9  | 5 | 4 | 0.1111111 | 0.008      | PTPRS    | ZNRF4        |   |
| chr19 | +(5867103..5867642)   | 539  | 2.97166 | 9  | 6 | 3 | 0.3333333 | 0.048      | FUT3     | FUT5         |   |
| chr19 | +(6213696..6214214)   | 518  | 2.97166 | 6  | 4 | 2 | 0.3333333 | 0.067      | ACSBG2   | MLLT1        |   |
| chr19 | +(6215215..6216278)   | 1063 | 0.61721 | 14 | 8 | 6 | 0.1428571 | 0.00097289 | ACSBG2   | MLLT1        |   |
| chr19 | +(7477305..7477978)   | 673  | 0.30033 | 9  | 5 | 4 | 0.1111111 | 0.008      | ARHGEF18 | LOC100128573 |   |
| chr19 | +(7910332..7910922)   | 590  | 1.34748 | 7  | 4 | 3 | 0.1428571 | 0.029      | EVI5L    | FLJ22184     |   |
| chr19 | +(8005614..8006304)   | 690  | 0.04215 | 13 | 7 | 6 | 0.0769231 | 0.0013499  | CTXN1    | TIMM44       |   |
| chr19 | +(8921786..8922288)   | 502  | 2.97166 | 13 | 5 | 8 | 0.2307692 | 0.5        | OR2Z1    | ZNF558       |   |
| chr19 | +(9203822..9204358)   | 536  | 1.34748 | 11 | 4 | 7 | 0.2727273 | 0.464      | MUC16    | OR1M1        |   |
| chr19 | +(9211418..9212182)   | 764  | 0.00374 | 15 | 8 | 7 | 0.0666667 | 0.00059687 | OR1M1    | OR7G2        |   |
| chr19 | +(10295115..10295815) | 700  | 2.97166 | 9  | 3 | 6 | 0.3333333 | 0.988      | EIF3G    | DNMT1        |   |
| chr19 | +(10789502..10790163) | 661  | 1.34748 | 7  | 4 | 3 | 0.1428571 | 0.029      | ILF3     | QTRT1        |   |
| chr19 | +(11323685..11324332) | 647  | 1.34748 | 9  | 4 | 5 | 0.1111111 | 0.008      | KANK2    | DOCK6        |   |
| chr19 | +(11725363..11725955) | 592  | 0.61721 | 10 | 4 | 6 | 0.2       | 0.033      | ZNF627   | ZNF833P      |   |
| chr19 | +(12057820..12058339) | 519  | 1.34748 | 10 | 6 | 4 | 0.2       | 0.238      | ZNF700   | ZNF763       |   |
| chr19 | +(12088025..12088712) | 687  | 1.34748 | 14 | 7 | 7 | 0         | 0.57599689 | ZNF763   | ZNF433       |   |
| chr19 | +(12184524..12185137) | 613  | 0.61721 | 10 | 3 | 7 | 0.4       | 0.033      | ZNF844   | ZNF788       |   |
| chr19 | +(12186427..12186972) | 545  | 1.34748 | 12 | 5 | 7 | 0.1666667 | 0.11161257 | ZNF844   | ZNF788       |   |
| chr19 | +(12574668..12575302) | 634  | 0.61721 | 9  | 5 | 4 | 0.1111111 | 0.032      | ZNF443   | ZNF709       |   |
| chr19 | +(12575710..12576360) | 650  | 0.61721 | 11 | 6 | 5 | 0.0909091 | 0.05017413 | ZNF443   | ZNF709       |   |
| chr19 | +(12638302..12638813) | 511  | 2.97166 | 12 | 5 | 7 | 0.1666667 | 0.14557611 | ZNF709   | ZNF564       |   |
| chr19 | +(13009666..13010306) | 640  | 0.61721 | 9  | 5 | 4 | 0.1111111 | 0.095      | GCDH     | SYCE2        |   |
| chr19 | +(13113807..13114504) | 697  | 2.97166 | 9  | 6 | 3 | 0.3333333 | 0.988      | NFIX     | LYL1         | v |

|       |                       |      |         |    |    |    |           |            |                |               |
|-------|-----------------------|------|---------|----|----|----|-----------|------------|----------------|---------------|
| chr19 | +(13397154..13397717) | 563  | 2.97166 | 6  | 4  | 2  | 0.3333333 | 0.067      | IER2           | CACNA1A       |
| chr19 | +(14000732..14001279) | 547  | 0.30033 | 13 | 6  | 7  | 0.0769231 | 0.01606229 | NANOS3         | C19orf57      |
| chr19 | +(14011631..14012328) | 697  | 2.97166 | 9  | 6  | 3  | 0.3333333 | 0.012      | NANOS3         | C19orf57      |
| chr19 | +(14579724..14580538) | 814  | 0.87687 | 18 | 7  | 11 | 0.2222222 | 0.0002444  | PKN1           | PTGER1        |
| chr19 | +(15511111..15511650) | 539  | 2.97166 | 13 | 9  | 4  | 0.3846154 | 0.793      | AKAP8          | AKAP8L        |
| chr19 | +(15917802..15918678) | 876  | 0.61721 | 20 | 12 | 8  | 0.2       | 0.00677733 | OR10H5         | OR10H1        |
| chr19 | +(16127328..16127915) | 587  | 0.14459 | 10 | 6  | 4  | 0.2       | 0.005      | LOC126536      | FLJ25328      |
| chr19 | +(17197664..17198629) | 965  | 1.34748 | 13 | 6  | 7  | 0.0769231 | 0.0013499  | MYO9B          | USE1          |
| chr19 | +(17436535..17437077) | 542  | 2.97166 | 6  | 2  | 4  | 0.3333333 | 0.067      | DDA1           | ANO8          |
| chr19 | +(17712376..17712879) | 503  | 2.97166 | 6  | 2  | 4  | 0.3333333 | 0.067      | GLT25D1        | UNC13A        |
| chr19 | +(18376973..18377474) | 501  | 1.3783  | 20 | 11 | 9  | 0.1       | 0.00036134 | LOC729966      | KIAA1683      |
| chr19 | +(18896959..18897607) | 648  | 1.34748 | 10 | 7  | 3  | 0.4       | 0.808      | CRTC1          | COMP          |
| chr19 | +(19541274..19541821) | 547  | 0.30033 | 9  | 4  | 5  | 0.1111111 | 0.008      | GATAD2A        | TSSK6         |
| chr19 | +(19562765..19563443) | 678  | 2.97166 | 6  | 3  | 3  | 0         | 0.05       | GATAD2A        | TSSK6         |
| chr19 | +(19654294..19655230) | 936  | 0.61721 | 18 | 10 | 8  | 0.1111111 | 0.05487232 | CILP2          | PBX4          |
| chr19 | +(20728228..20728758) | 530  | 2.97166 | 10 | 5  | 5  | 0         | 0.45840747 | MIR1270-2_dup2 | ZNF737        |
| chr19 | +(20808014..20808884) | 870  | 2.97166 | 18 | 11 | 7  | 0.2222222 | 0.08019165 | ZNF737         | ZNF626        |
| chr19 | +(20976298..20976862) | 564  | 2.97166 | 9  | 3  | 6  | 0.3333333 | 0.012      | ZNF626         | ZNF85         |
| chr19 | +(22001739..22002261) | 522  | 1.3783  | 16 | 6  | 10 | 0.25      | 0.00170267 | LOC641367      | ZNF43         |
| chr19 | +(22171398..22171906) | 508  | 3.3319  | 21 | 10 | 11 | 0.047619  | 0.00123102 | ZNF43          | ZNF208        |
| chr19 | +(22585841..22586689) | 848  | 0.61721 | 16 | 6  | 10 | 0.25      | 0.06444254 | ZNF676         | ZNF98         |
| chr19 | +(22835977..22836498) | 521  | 1.34748 | 17 | 10 | 7  | 0.1764706 | 0.08592868 | ZNF492         | ZNF99         |
| chr19 | +(22836551..22837170) | 619  | 0.30033 | 10 | 5  | 5  | 0         | 0.00451172 | ZNF492         | ZNF99         |
| chr19 | +(22880120..22880654) | 534  | 1.34748 | 7  | 3  | 4  | 0.1428571 | 0.029      | ZNF492         | ZNF99         |
| chr19 | +(30198850..30199633) | 783  | 0.00085 | 17 | 9  | 8  | 0.0588235 | 0.000266   | PLEKHF1        | C19orf12      |
| chr19 | +(30222347..30222941) | 594  | 0.61721 | 9  | 6  | 3  | 0.3333333 | 0.083      | C19orf12       | CCNE1         |
| chr19 | +(30311500..30312052) | 552  | 2.97166 | 8  | 5  | 3  | 0.25      | 0.018      | CCNE1          | C19orf2       |
| chr19 | +(30334328..30335501) | 1173 | 1.34748 | 13 | 6  | 7  | 0.0769231 | 0.0013499  | CCNE1          | C19orf2       |
| chr19 | +(30378265..30378855) | 590  | 0.30033 | 9  | 5  | 4  | 0.1111111 | 0.008      | CCNE1          | C19orf2       |
| chr19 | +(30552150..30552850) | 700  | 0.30033 | 11 | 5  | 6  | 0.0909091 | 0.18065522 | C19orf2        | ZNF536        |
| chr19 | +(30568604..30569199) | 595  | 1.34748 | 12 | 4  | 8  | 0.3333333 | 0.715      | C19orf2        | ZNF536        |
| chr19 | +(30582179..30582992) | 813  | 0.00374 | 23 | 12 | 11 | 0.0434783 | 0.01819444 | C19orf2        | ZNF536        |
| chr19 | +(30788561..30789081) | 520  | 0.30033 | 9  | 5  | 4  | 0.1111111 | 0.008      | C19orf2        | ZNF536        |
| chr19 | +(30948695..30949233) | 538  | 0.30033 | 9  | 5  | 4  | 0.1111111 | 0.008      | ZNF536         | DKFZp566F0947 |

|       |                       |      |         |    |    |    |           |            |               |               |
|-------|-----------------------|------|---------|----|----|----|-----------|------------|---------------|---------------|
| chr19 | +(31026715..31027226) | 511  | 2.97166 | 6  | 4  | 2  | 0.3333333 | 0.067      | ZNF536        | DKFZp566F0947 |
| chr19 | +(31036607..31037279) | 672  | 0.04215 | 12 | 7  | 5  | 0.1666667 | 0.00224163 | ZNF536        | DKFZp566F0947 |
| chr19 | +(31039229..31039736) | 507  | 2.97166 | 10 | 3  | 7  | 0.4       | 0.742      | ZNF536        | DKFZp566F0947 |
| chr19 | +(31117491..31118046) | 555  | 1.34748 | 10 | 6  | 4  | 0.2       | 0.543      | ZNF536        | DKFZp566F0947 |
| chr19 | +(31244231..31244931) | 700  | 2.97166 | 11 | 5  | 6  | 0.0909091 | 0.99691505 | ZNF536        | DKFZp566F0947 |
| chr19 | +(31349055..31349754) | 699  | 0.30033 | 15 | 10 | 5  | 0.3333333 | 0.99890018 | ZNF536        | DKFZp566F0947 |
| chr19 | +(31400742..31401296) | 554  | 2.97166 | 6  | 3  | 3  | 0         | 0.05       | ZNF536        | DKFZp566F0947 |
| chr19 | +(31632229..31633123) | 894  | 0.14459 | 15 | 6  | 9  | 0.2       | 0.00073136 | ZNF536        | DKFZp566F0947 |
| chr19 | +(31734279..31734906) | 627  | 1.34748 | 7  | 4  | 3  | 0.1428571 | 0.029      | DKFZp566F0947 | TSHZ3         |
| chr19 | +(31767259..31767851) | 592  | 0.14459 | 13 | 6  | 7  | 0.0769231 | 0.01113549 | DKFZp566F0947 | TSHZ3         |
| chr19 | +(32224175..32224780) | 605  | 1.34748 | 7  | 4  | 3  | 0.1428571 | 0.029      | TSHZ3         | ZNF507        |
| chr19 | +(32477328..32477884) | 556  | 1.34748 | 7  | 4  | 3  | 0.1428571 | 0.029      | TSHZ3         | ZNF507        |
| chr19 | +(32672455..32673028) | 573  | 2.97166 | 6  | 2  | 4  | 0.3333333 | 0.067      | TSHZ3         | ZNF507        |
| chr19 | +(32873142..32873682) | 540  | 1.34748 | 10 | 3  | 7  | 0.4       | 0.008      | ZNF507        | DPY19L3       |
| chr19 | +(33107591..33108166) | 575  | 2.97166 | 6  | 4  | 2  | 0.3333333 | 0.067      | PDCD5         | ANKRD27       |
| chr19 | +(33110720..33111704) | 984  | 0.30033 | 15 | 9  | 6  | 0.2       | 0.00073136 | PDCD5         | ANKRD27       |
| chr19 | +(33119664..33120364) | 700  | 1.34748 | 13 | 6  | 7  | 0.0769231 | 0.97724986 | PDCD5         | ANKRD27       |
| chr19 | +(33120873..33122097) | 1224 | 0.61721 | 21 | 8  | 13 | 0.2380952 | 0.99991702 | PDCD5         | ANKRD27       |
| chr19 | +(33227367..33228048) | 681  | 0.61721 | 8  | 5  | 3  | 0.25      | 0.018      | TDRD12        | SLC7A9        |
| chr19 | +(33319610..33320980) | 1370 | 0.06425 | 19 | 11 | 8  | 0.1578947 | 0.00013997 | TDRD12        | SLC7A9        |
| chr19 | +(33352607..33353150) | 543  | 0.61721 | 9  | 6  | 3  | 0.3333333 | 0.012      | TDRD12        | SLC7A9        |
| chr19 | +(33430361..33431292) | 931  | 2.97166 | 13 | 7  | 6  | 0.0769231 | 0.98393771 | SLC7A9        | CCDC123       |
| chr19 | +(33481122..33481890) | 768  | 0.30033 | 18 | 10 | 8  | 0.1111111 | 0.03102776 | C19orf40      | RHPN2         |
| chr19 | +(33490045..33490570) | 525  | 1.34748 | 10 | 3  | 7  | 0.4       | 0.908      | C19orf40      | RHPN2         |
| chr19 | +(33576501..33577080) | 579  | 2.97166 | 8  | 4  | 4  | 0         | 0.014      | GPATCH1       | WDR88         |
| chr19 | +(33689741..33690688) | 947  | 0.30033 | 17 | 8  | 9  | 0.0588235 | 0.000266   | LRP3          | SLC7A10       |
| chr19 | +(33795837..33796530) | 693  | 0.30033 | 9  | 6  | 3  | 0.3333333 | 0.012      | LOC80054      | CEBPG         |
| chr19 | +(33862578..33863144) | 566  | 0.0163  | 13 | 8  | 5  | 0.2307692 | 0.0017074  | LOC80054      | CEBPG         |
| chr19 | +(33876715..33877250) | 535  | 0.14459 | 10 | 3  | 7  | 0.4       | 0.008      | CEBPG         | PEPD          |
| chr19 | +(33887271..33887825) | 554  | 0.61721 | 8  | 3  | 5  | 0.25      | 0.018      | CEBPG         | PEPD          |
| chr19 | +(33893989..33894748) | 759  | 0.61721 | 14 | 8  | 6  | 0.1428571 | 0.00097289 | CEBPG         | PEPD          |
| chr19 | +(33902038..33902627) | 589  | 0.30033 | 13 | 4  | 9  | 0.3846154 | 0.999      | CEBPG         | PEPD          |
| chr19 | +(33903896..33904421) | 525  | 2.97166 | 11 | 6  | 5  | 0.0909091 | 0.99691505 | CEBPG         | PEPD          |
| chr19 | +(33951514..33952212) | 698  | 0.55276 | 13 | 6  | 7  | 0.0769231 | 0.0013499  | CEBPG         | PEPD          |

|       |                       |      |         |    |    |    |           |            |          |              |
|-------|-----------------------|------|---------|----|----|----|-----------|------------|----------|--------------|
| chr19 | +(33995445..33996145) | 700  | 2.97166 | 10 | 4  | 6  | 0.2       | 0.005      | CEBPG    | PEPD         |
| chr19 | +(34003925..34004586) | 661  | 0.61721 | 8  | 5  | 3  | 0.25      | 0.018      | CEBPG    | PEPD         |
| chr19 | +(34150665..34151333) | 668  | 2.97166 | 6  | 2  | 4  | 0.3333333 | 0.067      | CHST8    | KCTD15       |
| chr19 | +(34165585..34166285) | 700  | 0.14459 | 16 | 11 | 5  | 0.375     | 0.90368099 | CHST8    | KCTD15       |
| chr19 | +(34214420..34215120) | 700  | 0.00374 | 15 | 7  | 8  | 0.0666667 | 0.00059687 | CHST8    | KCTD15       |
| chr19 | +(34838356..34839056) | 700  | 0.14459 | 11 | 7  | 4  | 0.2727273 | 0.006      | KIAA0355 | GPI          |
| chr19 | +(34847960..34848534) | 574  | 0.61721 | 8  | 5  | 3  | 0.25      | 0.018      | KIAA0355 | GPI          |
| chr19 | +(34870983..34871492) | 509  | 1.34748 | 7  | 4  | 3  | 0.1428571 | 0.029      | GPI      | PDCD2L       |
| chr19 | +(34877120..34877732) | 612  | 2.97166 | 6  | 3  | 3  | 0         | 0.05       | GPI      | PDCD2L       |
| chr19 | +(34905874..34906574) | 700  | 0.30033 | 13 | 9  | 4  | 0.3846154 | 0.001      | PDCD2L   | UBA2         |
| chr19 | +(34977356..34978015) | 659  | 0.14459 | 10 | 5  | 5  | 0         | 0.00451172 | WTIP     | LOC643719    |
| chr19 | +(35125695..35126224) | 529  | 2.97166 | 6  | 2  | 4  | 0.3333333 | 0.067      | SCGBL    | ZNF302       |
| chr19 | +(35168565..35169488) | 923  | 0.00078 | 31 | 10 | 21 | 0.3548387 | 0.85461702 | SCGBL    | ZNF302       |
| chr19 | +(35486565..35487311) | 746  | 0.06425 | 22 | 12 | 10 | 0.0909091 | 0.25482574 | ZNF792   | GRAMD1A      |
| chr19 | +(35500789..35501479) | 690  | 0.00078 | 20 | 13 | 7  | 0.3       | 0.00015575 | GRAMD1A  | SCN1B        |
| chr19 | +(35512706..35513617) | 911  | 0.30033 | 18 | 8  | 10 | 0.1111111 | 0.00223263 | GRAMD1A  | SCN1B        |
| chr19 | +(35523119..35523961) | 842  | 0.0163  | 20 | 7  | 13 | 0.3       | 0.00028336 | SCN1B    | HPN          |
| chr19 | +(35533266..35534396) | 1130 | 2.97166 | 18 | 8  | 10 | 0.1111111 | 0.99981036 | HPN      | LOC100128675 |
| chr19 | +(35538111..35538768) | 657  | 0.30033 | 9  | 6  | 3  | 0.3333333 | 0.012      | HPN      | LOC100128675 |
| chr19 | +(35624770..35625333) | 563  | 2.97166 | 12 | 8  | 4  | 0.3333333 | 0.715      | FXYD3    | LGI4         |
| chr19 | +(35635858..35636396) | 538  | 2.97166 | 6  | 2  | 4  | 0.3333333 | 0.067      | FXYD7    | FXYD5        |
| chr19 | +(35761821..35762467) | 646  | 2.97166 | 8  | 5  | 3  | 0.25      | 0.393      | USF2     | HAMP         |
| chr19 | +(35770882..35771582) | 700  | 0.30033 | 13 | 7  | 6  | 0.0769231 | 0.66588243 | USF2     | HAMP         |
| chr19 | +(35811447..35812131) | 684  | 0.0163  | 16 | 8  | 8  | 0         | 0.00038877 | MAG      | CD22         |
| chr19 | +(35828892..35829804) | 912  | 0.14459 | 18 | 7  | 11 | 0.2222222 | 0.00216645 | CD22     | FFAR1        |
| chr19 | +(35996862..35997563) | 701  | 0.14459 | 17 | 10 | 7  | 0.1764706 | 0.31279262 | KRTDAP   | DMKN         |
| chr19 | +(36001481..36002261) | 780  | 1.34748 | 13 | 4  | 9  | 0.3846154 | 0.001      | KRTDAP   | DMKN         |
| chr19 | +(36024051..36024719) | 668  | 0.61721 | 13 | 5  | 8  | 0.2307692 | 0.9982926  | SBSN     | GAPDHS       |
| chr19 | +(36025943..36027175) | 1232 | 0.06425 | 19 | 8  | 11 | 0.1578947 | 0.00013997 | GAPDHS   | TMEM147      |
| chr19 | +(36032606..36033148) | 542  | 2.97166 | 6  | 2  | 4  | 0.3333333 | 0.067      | GAPDHS   | TMEM147      |
| chr19 | +(36250629..36251319) | 690  | 0.61721 | 13 | 9  | 4  | 0.3846154 | 0.02       | C19orf55 | ARHGAP33     |
| chr19 | +(36356685..36357284) | 599  | 1.34748 | 8  | 4  | 4  | 0         | 0.014      | KIRREL2  | APLP1        |
| chr19 | +(36523122..36523729) | 607  | 0.61721 | 8  | 4  | 4  | 0         | 0.014      | ALKBH6   | CLIP3        |
| chr19 | +(36592714..36593265) | 551  | 2.97166 | 6  | 2  | 4  | 0.3333333 | 0.067      | WDR62    | POLR2I       |

|       |                       |      |         |    |    |    |           |            |          |           |   |
|-------|-----------------------|------|---------|----|----|----|-----------|------------|----------|-----------|---|
| chr19 | +(36604374..36605165) | 791  | 0.06425 | 12 | 6  | 6  | 0         | 0.00197388 | WDR62    | POLR2I    |   |
| chr19 | +(37440420..37441066) | 646  | 2.97166 | 9  | 3  | 6  | 0.3333333 | 0.012      | ZNF568   | ZNF420    |   |
| chr19 | +(37547071..37547667) | 596  | 1.34748 | 10 | 7  | 3  | 0.4       | 0.417      | ZNF568   | ZNF420    |   |
| chr19 | +(37642991..37644292) | 1301 | 0.30033 | 30 | 12 | 18 | 0.2       | 0.14495151 | ZNF420   | ZNF585A   |   |
| chr19 | +(37677063..37677571) | 508  | 2.97166 | 14 | 6  | 8  | 0.1428571 | 0.39812671 | ZNF585A  | ZNF585B   |   |
| chr19 | +(37734063..37734624) | 561  | 1.34748 | 9  | 4  | 5  | 0.1111111 | 0.008      | ZNF383   | LOC284412 |   |
| chr19 | +(37879753..37880316) | 563  | 2.97166 | 6  | 2  | 4  | 0.3333333 | 0.067      | ZNF527   | ZNF569    | v |
| chr19 | +(37893852..37894552) | 700  | 2.97166 | 11 | 5  | 6  | 0.0909091 | 0.99691505 | ZNF527   | ZNF569    | v |
| chr19 | +(37922514..37923025) | 511  | 2.97166 | 6  | 2  | 4  | 0.3333333 | 0.067      | ZNF527   | ZNF569    | v |
| chr19 | +(37957587..37958206) | 619  | 1.34748 | 10 | 4  | 6  | 0.2       | 0.005      | ZNF527   | ZNF569    | v |
| chr19 | +(37958895..37959541) | 646  | 1.34748 | 11 | 7  | 4  | 0.2727273 | 0.003      | ZNF569   | ZNF570    | v |
| chr19 | +(38180460..38181160) | 700  | 1.34748 | 11 | 7  | 4  | 0.2727273 | 0.997      | ZFP30    | ZNF781    |   |
| chr19 | +(38411186..38412927) | 1741 | 0.14459 | 23 | 10 | 13 | 0.1304348 | 0.78994366 | SIPA1L3  | DPF1      |   |
| chr19 | +(38464235..38465072) | 837  | 0.01114 | 14 | 8  | 6  | 0.1428571 | 0.00097289 | SIPA1L3  | DPF1      |   |
| chr19 | +(38565719..38566317) | 598  | 1.34748 | 8  | 3  | 5  | 0.25      | 0.018      | SIPA1L3  | DPF1      |   |
| chr19 | +(38588404..38588972) | 568  | 2.97166 | 6  | 4  | 2  | 0.3333333 | 0.067      | SIPA1L3  | DPF1      |   |
| chr19 | +(38594443..38595143) | 700  | 0.30033 | 9  | 6  | 3  | 0.3333333 | 0.012      | SIPA1L3  | DPF1      |   |
| chr19 | +(38797567..38798138) | 571  | 2.97166 | 6  | 4  | 2  | 0.3333333 | 0.067      | SPINT2   | YIF1B     |   |
| chr19 | +(38808938..38809638) | 700  | 1.34748 | 12 | 5  | 7  | 0.1666667 | 0.28488218 | C19orf33 | KCNK6     |   |
| chr19 | +(38811089..38811703) | 614  | 2.97166 | 8  | 3  | 5  | 0.25      | 0.714      | KCNK6    | CATSPERG  |   |
| chr19 | +(38892659..38893430) | 771  | 0.61721 | 15 | 8  | 7  | 0.0666667 | 0.00059687 | SPRED3   | FAM98C    |   |
| chr19 | +(38895003..38895703) | 700  | 2.97166 | 10 | 4  | 6  | 0.2       | 0.995      | FAM98C   | RASGRP4   |   |
| chr19 | +(38925719..38926419) | 700  | 1.34748 | 8  | 5  | 3  | 0.25      | 0.018      | RYR1     | MAP4K1    |   |
| chr19 | +(38997128..38998755) | 1627 | 0.06425 | 30 | 11 | 19 | 0.2666667 | 0.00666933 | RYR1     | MAP4K1    |   |
| chr19 | +(39001075..39001643) | 568  | 0.14459 | 12 | 6  | 6  | 0         | 0.00520281 | RYR1     | MAP4K1    |   |
| chr19 | +(39002724..39003368) | 644  | 2.97166 | 14 | 5  | 9  | 0.2857143 | 0.63055866 | RYR1     | MAP4K1    |   |
| chr19 | +(39073333..39074033) | 700  | 1.34748 | 12 | 7  | 5  | 0.1666667 | 0.00224163 | RYR1     | MAP4K1    |   |
| chr19 | +(39167180..39167880) | 700  | 0.30033 | 9  | 6  | 3  | 0.3333333 | 0.012      | ACTN4    | CAPN12    |   |
| chr19 | +(39213065..39213693) | 628  | 0.14459 | 10 | 5  | 5  | 0         | 0.00451172 | ACTN4    | CAPN12    |   |
| chr19 | +(39218136..39219023) | 887  | 0.00078 | 18 | 12 | 6  | 0.3333333 | 0.00037352 | ACTN4    | CAPN12    |   |
| chr19 | +(39224324..39225109) | 785  | 0.39994 | 22 | 15 | 7  | 0.3636364 | 0.01878678 | ACTN4    | CAPN12    |   |
| chr19 | +(39228472..39229126) | 654  | 0.61721 | 8  | 5  | 3  | 0.25      | 0.018      | ACTN4    | CAPN12    |   |
| chr19 | +(39306152..39306852) | 700  | 0.06425 | 15 | 6  | 9  | 0.2       | 0.00073136 | LGALS4   | ECH1      |   |
| chr19 | +(39342020..39342584) | 564  | 2.97166 | 6  | 4  | 2  | 0.3333333 | 0.067      | ECH1     | HNRNPL    |   |

|       |                       |      |         |    |    |    |           |            |          |          |
|-------|-----------------------|------|---------|----|----|----|-----------|------------|----------|----------|
| chr19 | +(39372106..39372652) | 546  | 2.97166 | 7  | 3  | 4  | 0.1428571 | 0.029      | RINL     | SIRT2    |
| chr19 | +(39377962..39378561) | 599  | 0.14459 | 10 | 7  | 3  | 0.4       | 0.008      | RINL     | SIRT2    |
| chr19 | +(39422837..39424095) | 1258 | 0.00221 | 35 | 23 | 12 | 0.3142857 | 0.09331884 | MRPS12   | FBXO17   |
| chr19 | +(39517486..39518186) | 700  | 0.04215 | 18 | 7  | 11 | 0.2222222 | 0.00216645 | FBXO17   | FBXO27   |
| chr19 | +(39849226..39849926) | 700  | 0.30033 | 13 | 6  | 7  | 0.0769231 | 0.66588243 | SAMD4B   | PAF1     |
| chr19 | +(39898503..39899188) | 685  | 0.06425 | 15 | 7  | 8  | 0.0666667 | 0.00059687 | ZFP36    | PLEKHG2  |
| chr19 | +(39948975..39949675) | 700  | 0.30033 | 10 | 7  | 3  | 0.4       | 0.058      | SUPT5H   | TIMM50   |
| chr19 | +(39959930..39960478) | 548  | 2.97166 | 6  | 3  | 3  | 0         | 0.05       | SUPT5H   | TIMM50   |
| chr19 | +(40224529..40225044) | 515  | 1.34748 | 7  | 4  | 3  | 0.1428571 | 0.029      | LGALS14  | CLC      |
| chr19 | +(40317997..40319447) | 1450 | 0.00221 | 37 | 13 | 24 | 0.2972973 | 7.5667E-06 | LEUTX    | DYRK1B   |
| chr19 | +(40330789..40331360) | 571  | 0.61721 | 18 | 12 | 6  | 0.3333333 | 0.06699686 | DYRK1B   | FBL      |
| chr19 | +(40401968..40402613) | 645  | 3.3319  | 23 | 15 | 8  | 0.3043478 | 0.0070857  | FBL      | FCGBP    |
| chr19 | +(40519537..40520157) | 620  | 0.30033 | 15 | 7  | 8  | 0.0666667 | 0.01031878 | ZNF546   | ZNF780B  |
| chr19 | +(40580688..40581784) | 1096 | 0.06425 | 32 | 15 | 17 | 0.0625    | 0.00017946 | ZNF780B  | ZNF780A  |
| chr19 | +(40671279..40672188) | 909  | 0.00221 | 24 | 16 | 8  | 0.3333333 | 4.4425E-05 | ZNF780A  | MAP3K10  |
| chr19 | +(40767972..40768969) | 997  | 0.0163  | 20 | 9  | 11 | 0.1       | 0.63378005 | CNTD2    | AKT2     |
| chr19 | +(40774318..40774921) | 603  | 0.14459 | 10 | 4  | 6  | 0.2       | 0.005      | CNTD2    | AKT2     |
| chr19 | +(40861478..40862009) | 531  | 2.97166 | 14 | 9  | 5  | 0.2857143 | 0.0013499  | PLD3     | HIPK4    |
| chr19 | +(40886989..40887491) | 502  | 2.97166 | 7  | 4  | 3  | 0.1428571 | 0.114      | PLD3     | HIPK4    |
| chr19 | +(40902390..40903185) | 795  | 0.30033 | 18 | 9  | 9  | 0         | 0.00353832 | HIPK4    | PRX      |
| chr19 | +(40946880..40947907) | 1027 | 0.00035 | 29 | 11 | 18 | 0.2413793 | 4.2991E-06 | SERTAD1  | SERTAD3  |
| chr19 | +(40995345..40995862) | 517  | 1.34748 | 8  | 5  | 3  | 0.25      | 0.125      | SPTBN4   | SHKBP1   |
| chr19 | +(41095292..41095901) | 609  | 0.30033 | 9  | 3  | 6  | 0.3333333 | 0.012      | SHKBP1   | LTBP4    |
| chr19 | +(41096013..41096571) | 558  | 0.61721 | 10 | 3  | 7  | 0.4       | 0.008      | SHKBP1   | LTBP4    |
| chr19 | +(41113570..41114071) | 501  | 2.97166 | 9  | 6  | 3  | 0.3333333 | 0.19       | LTBP4    | NUMBL    |
| chr19 | +(41129932..41131317) | 1385 | 0.61721 | 14 | 8  | 6  | 0.1428571 | 0.00097289 | LTBP4    | NUMBL    |
| chr19 | +(41208138..41208731) | 593  | 2.97166 | 6  | 4  | 2  | 0.3333333 | 0.067      | NUMBL    | ADCK4    |
| chr19 | +(41231108..41231808) | 700  | 0.14459 | 14 | 5  | 9  | 0.2857143 | 0.0013499  | ITPKC    | C19orf54 |
| chr19 | +(41355956..41356469) | 513  | 2.97166 | 10 | 4  | 6  | 0.2       | 0.057      | EGLN2    | CYP2A6   |
| chr19 | +(41628921..41630099) | 1178 | 0.30033 | 17 | 10 | 7  | 0.1764706 | 0.00031815 | CYP2F1   | CYP2S1   |
| chr19 | +(41726743..41727388) | 645  | 0.22248 | 15 | 5  | 10 | 0.3333333 | 0.00109982 | AXL      | HNRNPUL1 |
| chr19 | +(41729436..41729971) | 535  | 2.97166 | 6  | 3  | 3  | 0         | 0.05       | AXL      | HNRNPUL1 |
| chr19 | +(41813669..41814541) | 872  | 0.00221 | 20 | 8  | 12 | 0.2       | 0.00010641 | HNRNPUL1 | CCDC97   |
| chr19 | +(41860313..41861182) | 869  | 1.34748 | 14 | 9  | 5  | 0.2857143 | 0.0013499  | TGFB1    | B9D2     |

|       |                       |      |         |    |    |    |           |            |          |         |
|-------|-----------------------|------|---------|----|----|----|-----------|------------|----------|---------|
| chr19 | +(41891760..41892681) | 921  | 1.34748 | 14 | 8  | 6  | 0.1428571 | 0.00097289 | TMEM91   | EXOSC5  |
| chr19 | +(41909304..41909972) | 668  | 0.14459 | 10 | 6  | 4  | 0.2       | 0.005      | BCKDHA   | B3GNT8  |
| chr19 | +(41920686..41921384) | 698  | 0.61721 | 8  | 4  | 4  | 0         | 0.014      | BCKDHA   | B3GNT8  |
| chr19 | +(42125434..42126428) | 994  | 0.61721 | 18 | 6  | 12 | 0.3333333 | 0.1305271  | CEACAM21 | CEACAM4 |
| chr19 | +(42190456..42191012) | 556  | 1.34748 | 11 | 4  | 7  | 0.2727273 | 0.324      | CEACAM4  | CEACAM7 |
| chr19 | +(42239280..42239794) | 514  | 2.97166 | 6  | 4  | 2  | 0.3333333 | 0.067      | CEACAM5  | CEACAM6 |
| chr19 | +(42261529..42262359) | 830  | 0.06425 | 12 | 5  | 7  | 0.1666667 | 0.00224163 | CEACAM6  | CEACAM3 |
| chr19 | +(42292667..42293367) | 700  | 1.34748 | 12 | 5  | 7  | 0.1666667 | 0.00224163 | CEACAM6  | CEACAM3 |
| chr19 | +(42301573..42302108) | 535  | 1.34748 | 13 | 7  | 6  | 0.0769231 | 0.03164542 | CEACAM3  | LYPD4   |
| chr19 | +(42318059..42318654) | 595  | 0.00085 | 17 | 8  | 9  | 0.0588235 | 0.000266   | CEACAM3  | LYPD4   |
| chr19 | +(42423356..42424479) | 1123 | 0.61721 | 14 | 8  | 6  | 0.1428571 | 0.99902711 | ARHGEF1  | RABAC1  |
| chr19 | +(42460466..42461404) | 938  | 0.61721 | 16 | 6  | 10 | 0.25      | 0.00056905 | ARHGEF1  | RABAC1  |
| chr19 | +(42479539..42480184) | 645  | 1.34748 | 10 | 4  | 6  | 0.2       | 0.005      | RABAC1   | ATP1A3  |
| chr19 | +(42481878..42482565) | 687  | 0.04215 | 12 | 5  | 7  | 0.1666667 | 0.00224163 | RABAC1   | ATP1A3  |
| chr19 | +(42566338..42566873) | 535  | 2.97166 | 6  | 4  | 2  | 0.3333333 | 0.067      | ATP1A3   | GRIK5   |
| chr19 | +(42569396..42570096) | 700  | 0.30033 | 12 | 5  | 7  | 0.1666667 | 0.04407898 | ATP1A3   | GRIK5   |
| chr19 | +(42572906..42573428) | 522  | 2.97166 | 9  | 6  | 3  | 0.3333333 | 0.988      | GRIK5    | ZNF574  |
| chr19 | +(42596200..42596775) | 575  | 2.97166 | 8  | 4  | 4  | 0         | 0.1        | ZNF574   | POU2F2  |
| chr19 | +(42728015..42728669) | 654  | 1.34748 | 12 | 5  | 7  | 0.1666667 | 0.00224163 | ZNF526   | GSK3A   |
| chr19 | +(42737482..42738027) | 545  | 0.61721 | 8  | 3  | 5  | 0.25      | 0.018      | ZNF526   | GSK3A   |
| chr19 | +(42838993..42839513) | 520  | 2.97166 | 6  | 4  | 2  | 0.3333333 | 0.067      | MEGF8    | CNFN    |
| chr19 | +(42848022..42848718) | 696  | 0.61721 | 13 | 9  | 4  | 0.3846154 | 0.02       | MEGF8    | CNFN    |
| chr19 | +(42848791..42849356) | 565  | 0.14459 | 15 | 10 | 5  | 0.3333333 | 0.00109982 | MEGF8    | CNFN    |
| chr19 | +(42854834..42855363) | 529  | 2.97166 | 9  | 6  | 3  | 0.3333333 | 0.012      | MEGF8    | CNFN    |
| chr19 | +(42906342..42907070) | 728  | 1.34748 | 20 | 8  | 12 | 0.2       | 0.00273928 | CNFN     | LIPE    |
| chr19 | +(42910223..42910761) | 538  | 0.61721 | 11 | 6  | 5  | 0.0909091 | 0.29194121 | CNFN     | LIPE    |
| chr19 | +(42976765..42977632) | 867  | 0.30033 | 13 | 6  | 7  | 0.0769231 | 0.0013499  | CXCL17   | CEACAM1 |
| chr19 | +(43028213..43028913) | 700  | 0.61721 | 12 | 6  | 6  | 0         | 0.16833419 | CXCL17   | CEACAM1 |
| chr19 | +(43092670..43093278) | 608  | 0.61721 | 16 | 5  | 11 | 0.375     | 0.07837268 | CEACAM1  | CEACAM8 |
| chr19 | +(43096806..43097506) | 700  | 0.00374 | 15 | 10 | 5  | 0.3333333 | 0.00109982 | CEACAM1  | CEACAM8 |
| chr19 | +(43165162..43165713) | 551  | 0.14459 | 10 | 7  | 3  | 0.4       | 0.008      | CEACAM8  | PSG3    |
| chr19 | +(43268182..43268722) | 540  | 1.34748 | 11 | 6  | 5  | 0.0909091 | 0.64249967 | PSG3     | PSG8    |
| chr19 | +(44564360..44564903) | 543  | 1.34748 | 9  | 3  | 6  | 0.3333333 | 0.274      | ZNF223   | ZNF284  |
| chr19 | +(44584769..44585469) | 700  | 0.14459 | 16 | 6  | 10 | 0.25      | 0.00056905 | ZNF284   | ZNF224  |

|       |                       |      |         |    |    |    |           |            |         |              |
|-------|-----------------------|------|---------|----|----|----|-----------|------------|---------|--------------|
| chr19 | +(44598860..44599383) | 523  | 2.97166 | 6  | 2  | 4  | 0.3333333 | 0.067      | ZNF224  | LOC100379224 |
| chr19 | +(44604758..44605285) | 527  | 2.97166 | 9  | 6  | 3  | 0.3333333 | 0.024      | ZNF224  | LOC100379224 |
| chr19 | +(44890428..44892081) | 1653 | 0.22248 | 38 | 26 | 12 | 0.3684211 | 0.57472719 | ZFP112  | ZNF285       |
| chr19 | +(44975902..44976504) | 602  | 0.61721 | 17 | 11 | 6  | 0.2941176 | 0.45997219 | ZNF229  | ZNF180       |
| chr19 | +(44981878..44982403) | 525  | 1.34748 | 9  | 5  | 4  | 0.1111111 | 0.278      | ZNF229  | ZNF180       |
| chr19 | +(45157398..45158073) | 675  | 0.61721 | 8  | 4  | 4  | 0         | 0.014      | PVR     | CEACAM19     |
| chr19 | +(45288947..45289584) | 637  | 2.97166 | 6  | 2  | 4  | 0.3333333 | 0.067      | CBLC    | BCAM         |
| chr19 | +(45298417..45298923) | 506  | 1.34748 | 7  | 3  | 4  | 0.1428571 | 0.029      | CBLC    | BCAM         |
| chr19 | +(45850564..45851073) | 509  | 2.97166 | 6  | 4  | 2  | 0.3333333 | 0.067      | KLC3    | ERCC2        |
| chr19 | +(45920247..45920902) | 655  | 0.0163  | 13 | 5  | 8  | 0.2307692 | 0.0017074  | CD3EAP  | ERCC1        |
| chr19 | +(46005860..46006505) | 645  | 2.97166 | 6  | 2  | 4  | 0.3333333 | 0.067      | PPM1N   | VASP         |
| chr19 | +(46028920..46029585) | 665  | 0.06425 | 12 | 4  | 8  | 0.3333333 | 0.00328926 | VASP    | OPA3         |
| chr19 | +(46060153..46061044) | 891  | 1.34748 | 13 | 6  | 7  | 0.0769231 | 0.0013499  | VASP    | OPA3         |
| chr19 | +(46145197..46145896) | 699  | 0.02999 | 22 | 11 | 11 | 0         | 3.5526E-05 | GPR4    | EML2         |
| chr19 | +(46289740..46290306) | 566  | 2.97166 | 6  | 3  | 3  | 0         | 0.05       | DMPK    | DMWD         |
| chr19 | +(46332100..46333480) | 1380 | 0.04215 | 20 | 8  | 12 | 0.2       | 0.00010641 | RSPH6A  | SYMPK        |
| chr19 | +(46832467..46832974) | 507  | 1.34748 | 8  | 4  | 4  | 0         | 0.014      | HIF3A   | PPP5C        |
| chr19 | +(47254673..47255229) | 556  | 0.61721 | 8  | 4  | 4  | 0         | 0.014      | FKRP    | SLC1A5       |
| chr19 | +(47492485..47493133) | 648  | 0.01114 | 14 | 8  | 6  | 0.1428571 | 0.00097289 | GRLF1   | NPAS1        |
| chr19 | +(47592892..47593583) | 691  | 1.34748 | 10 | 4  | 6  | 0.2       | 0.005      | TMEM160 | ZC3H4        |
| chr19 | +(47868468..47869162) | 694  | 0.04215 | 12 | 6  | 6  | 0         | 0.00197388 | DHX34   | MEIS3        |
| chr19 | +(47873767..47874467) | 700  | 0.30033 | 9  | 3  | 6  | 0.3333333 | 0.012      | DHX34   | MEIS3        |
| chr19 | +(48014980..48015500) | 520  | 0.30033 | 9  | 5  | 4  | 0.1111111 | 0.008      | KPTN    | NAPA         |
| chr19 | +(48157335..48158035) | 700  | 0.06425 | 11 | 7  | 4  | 0.2727273 | 0.003      | GLTSCR1 | EHD2         |
| chr19 | +(48223722..48224263) | 541  | 2.97166 | 6  | 3  | 3  | 0         | 0.05       | EHD2    | GLTSCR2      |
| chr19 | +(48305133..48305656) | 523  | 2.94904 | 14 | 7  | 7  | 0         | 0.32736042 | SEPW1   | TPRX1        |
| chr19 | +(48525136..48525646) | 510  | 2.97166 | 8  | 4  | 4  | 0         | 0.057      | ELSPBP1 | CABP5        |
| chr19 | +(48658460..48659163) | 703  | 1.34748 | 12 | 7  | 5  | 0.1666667 | 0.00224163 | PLA2G4C | LIG1         |
| chr19 | +(48676908..48677467) | 559  | 0.14459 | 10 | 7  | 3  | 0.4       | 0.008      | LIG1    | CARD8        |
| chr19 | +(48733770..48734296) | 526  | 2.97166 | 14 | 5  | 9  | 0.2857143 | 0.87146285 | LIG1    | CARD8        |
| chr19 | +(48832549..48833215) | 666  | 1.34748 | 10 | 6  | 4  | 0.2       | 0.129      | EMP3    | TMEM143      |
| chr19 | +(48945350..48945868) | 518  | 0.61721 | 8  | 3  | 5  | 0.25      | 0.018      | GRIN2D  | GRWD1        |
| chr19 | +(48953733..48954246) | 513  | 0.14459 | 10 | 7  | 3  | 0.4       | 0.008      | GRWD1   | KCNJ14       |
| chr19 | +(49061834..49062399) | 565  | 2.97166 | 9  | 6  | 3  | 0.3333333 | 0.988      | SULT2B1 | FAM83E       |



|       |                       |      |         |    |    |    |           |            |           |          |
|-------|-----------------------|------|---------|----|----|----|-----------|------------|-----------|----------|
| chr19 | +(49221322..49221838) | 516  | 2.97166 | 7  | 3  | 4  | 0.1428571 | 0.029      | FUT2      | MAMSTR   |
| chr19 | +(49253247..49253854) | 607  | 0.61721 | 9  | 3  | 6  | 0.3333333 | 0.012      | IZUMO1    | FUT1     |
| chr19 | +(49298317..49298987) | 670  | 1.34748 | 7  | 3  | 4  | 0.1428571 | 0.029      | FGF21     | BCAT2    |
| chr19 | +(49364500..49365041) | 541  | 2.97166 | 6  | 4  | 2  | 0.3333333 | 0.067      | HSD17B14  | PLEKHA4  |
| chr19 | +(49477681..49478902) | 1221 | 2.97166 | 12 | 5  | 7  | 0.1666667 | 0.00224163 | FTL       | GYS1     |
| chr19 | +(49492739..49493900) | 1161 | 0.61721 | 21 | 8  | 13 | 0.2380952 | 0.99811521 | FTL       | GYS1     |
| chr19 | +(49495423..49495940) | 517  | 0.06425 | 11 | 7  | 4  | 0.2727273 | 0.003      | FTL       | GYS1     |
| chr19 | +(49608066..49608766) | 700  | 0.14459 | 10 | 7  | 3  | 0.4       | 0.008      | SNRNP70   | LIN7B    |
| chr19 | +(49632399..49632940) | 541  | 2.97166 | 7  | 3  | 4  | 0.1428571 | 0.029      | PPFIA3    | HRC      |
| chr19 | +(49638877..49639478) | 601  | 0.61721 | 12 | 7  | 5  | 0.1666667 | 0.18587565 | PPFIA3    | HRC      |
| chr19 | +(49691945..49692526) | 581  | 2.97166 | 11 | 5  | 6  | 0.0909091 | 0.07206352 | TRPM4     | SLC6A16  |
| chr19 | +(49778027..49778542) | 515  | 2.97166 | 7  | 3  | 4  | 0.1428571 | 0.314      | TRPM4     | SLC6A16  |
| chr19 | +(50088237..50088857) | 620  | 1.34748 | 7  | 4  | 3  | 0.1428571 | 0.029      | PRRG2     | PRR12    |
| chr19 | +(50160902..50161404) | 502  | 1.34748 | 11 | 4  | 7  | 0.2727273 | 0.264      | SCAF1     | IRF3     |
| chr19 | +(50184143..50184843) | 700  | 0.30033 | 9  | 3  | 6  | 0.3333333 | 0.012      | PRMT1     | C19orf76 |
| chr19 | +(50272368..50273068) | 700  | 1.34748 | 10 | 3  | 7  | 0.4       | 0.008      | AP2A1     | FUZ      |
| chr19 | +(50301490..50302185) | 695  | 0.14459 | 20 | 14 | 6  | 0.4       | 0.00667379 | AP2A1     | FUZ      |
| chr19 | +(50378982..50379533) | 551  | 0.30033 | 9  | 4  | 5  | 0.1111111 | 0.008      | PNKP      | AKT1S1   |
| chr19 | +(50419908..50420415) | 507  | 2.97166 | 6  | 3  | 3  | 0         | 0.05       | TBC1D17   | IL4I1    |
| chr19 | +(50485055..50485634) | 579  | 0.04215 | 13 | 4  | 9  | 0.3846154 | 0.099      | SIGLEC16  | VRK3     |
| chr19 | +(50755218..50755880) | 662  | 0.30033 | 9  | 4  | 5  | 0.1111111 | 0.008      | MYH14     | KCNC3    |
| chr19 | +(50880909..50882697) | 1788 | 0.00035 | 40 | 16 | 24 | 0.2       | 0.8652718  | NR1H2     | POLD1    |
| chr19 | +(50909638..50910351) | 713  | 0.0163  | 13 | 9  | 4  | 0.3846154 | 0.001      | POLD1     | SPIB     |
| chr19 | +(50926445..50927055) | 610  | 0.30033 | 11 | 5  | 6  | 0.0909091 | 0.18065522 | SPIB      | MYBPC2   |
| chr19 | +(51050015..51050580) | 565  | 2.97166 | 6  | 3  | 3  | 0         | 0.05       | ASPDH     | LRRC4B   |
| chr19 | +(51197091..51197791) | 700  | 0.04215 | 12 | 8  | 4  | 0.3333333 | 0.99671074 | LOC342918 | SHANK1   |
| chr19 | +(51226476..51227024) | 548  | 2.97166 | 6  | 4  | 2  | 0.3333333 | 0.067      | SHANK1    | CLEC11A  |
| chr19 | +(52032926..52034107) | 1181 | 0.30033 | 19 | 11 | 8  | 0.1578947 | 0.83912483 | SIGLEC12  | SIGLEC6  |
| chr19 | +(52084660..52085197) | 537  | 1.34748 | 11 | 6  | 5  | 0.0909091 | 0.01422987 | ZNF175    | FLJ30403 |
| chr19 | +(52783223..52783787) | 564  | 1.34748 | 7  | 3  | 4  | 0.1428571 | 0.029      | ZNF766    | MIR643   |
| chr19 | +(52793949..52794459) | 510  | 2.97166 | 8  | 4  | 4  | 0         | 0.014      | MIR643    | ZNF480   |
| chr19 | +(53208335..53208874) | 539  | 0.61721 | 13 | 4  | 9  | 0.3846154 | 0.074      | ZNF83     | ZNF611   |
| chr19 | +(53270519..53271152) | 633  | 1.34748 | 12 | 6  | 6  | 0         | 0.07477068 | ZNF611    | ZNF600   |
| chr19 | +(53454080..53454803) | 723  | 0.61721 | 16 | 8  | 8  | 0         | 0.04644598 | ZNF321    | ZNF816   |

|       |                       |      |         |    |    |    |           |            |         |           |
|-------|-----------------------|------|---------|----|----|----|-----------|------------|---------|-----------|
| chr19 | +(53603529..53604099) | 570  | 2.97166 | 6  | 2  | 4  | 0.3333333 | 0.067      | HERV-V2 | ZNF160    |
| chr19 | +(53854233..53854809) | 576  | 2.97166 | 9  | 6  | 3  | 0.3333333 | 0.19       | ZNF845  | ZNF525    |
| chr19 | +(54060281..54061426) | 1145 | 2.97166 | 12 | 7  | 5  | 0.1666667 | 0.97882147 | ZNF331  | LOC284379 |
| chr19 | +(54375729..54376282) | 553  | 1.34748 | 7  | 4  | 3  | 0.1428571 | 0.029      | MYADM   | PRKCG     |
| chr19 | +(54410318..54411457) | 1139 | 0.00221 | 27 | 17 | 10 | 0.2592593 | 0.0052232  | PRKCG   | CACNG7    |
| chr19 | +(54454849..54455549) | 700  | 0.14459 | 10 | 3  | 7  | 0.4       | 0.008      | CACNG7  | CACNG8    |
| chr19 | +(54481549..54482249) | 700  | 0.14459 | 10 | 7  | 3  | 0.4       | 0.008      | CACNG8  | MIR935    |
| chr19 | +(54626294..54626848) | 554  | 1.34748 | 7  | 3  | 4  | 0.1428571 | 0.029      | PRPF31  | CNOT3     |
| chr19 | +(54650605..54651184) | 579  | 0.61721 | 8  | 4  | 4  | 0         | 0.014      | CNOT3   | LENG1     |
| chr19 | +(54755608..54756147) | 539  | 2.97166 | 6  | 2  | 4  | 0.3333333 | 0.067      | LILRA6  | LILRB5    |
| chr19 | +(54780696..54781430) | 734  | 0.00221 | 22 | 7  | 15 | 0.3636364 | 0.94363505 | LILRB5  | LILRB2    |
| chr19 | +(54914749..54915449) | 700  | 2.97166 | 11 | 6  | 5  | 0.0909091 | 0.05017413 | LAIR1   | TTYH1     |
| chr19 | +(54945321..54945939) | 618  | 0.14459 | 10 | 5  | 5  | 0         | 0.00451172 | TTYH1   | LENG8     |
| chr19 | +(54968634..54969332) | 698  | 0.04215 | 13 | 6  | 7  | 0.0769231 | 0.0013499  | LENG8   | LENG9     |
| chr19 | +(55142080..55142607) | 527  | 1.34748 | 11 | 6  | 5  | 0.0909091 | 0.18065522 | LILRB1  | LILRB4    |
| chr19 | +(55262831..55263351) | 520  | 2.97166 | 10 | 5  | 5  | 0         | 0.00451172 | KIR2DL3 | KIR3DP1   |
| chr19 | +(55370117..55370639) | 522  | 0.14459 | 19 | 9  | 10 | 0.0526316 | 0.00568463 | KIR3DL2 | FCAR      |
| chr19 | +(55386397..55386916) | 519  | 2.97166 | 6  | 2  | 4  | 0.3333333 | 0.067      | FCAR    | NCR1      |
| chr19 | +(55538771..55539276) | 505  | 1.34748 | 10 | 3  | 7  | 0.4       | 0.008      | NLRP2   | GP6       |
| chr19 | +(55597027..55597727) | 700  | 0.00221 | 21 | 11 | 10 | 0.047619  | 5.3756E-05 | EPS8L1  | PPP1R12C  |
| chr19 | +(55603294..55603994) | 700  | 0.04215 | 13 | 8  | 5  | 0.2307692 | 0.0394913  | EPS8L1  | PPP1R12C  |
| chr19 | +(55750929..55751466) | 537  | 0.06425 | 11 | 7  | 4  | 0.2727273 | 0.003      | TMEM86B | PPP6R1    |
| chr19 | +(55831474..55832142) | 668  | 0.30033 | 11 | 7  | 4  | 0.2727273 | 0.003      | BRSK1   | TMEM150B  |
| chr19 | +(55916827..55918066) | 1239 | 0.30033 | 16 | 10 | 6  | 0.25      | 0.00056905 | RPL28   | UBE2S     |
| chr19 | +(55943985..55944685) | 700  | 0.0163  | 13 | 8  | 5  | 0.2307692 | 0.0017074  | UBE2S   | SHISA7    |
| chr19 | +(55950594..55951134) | 540  | 1.34748 | 7  | 4  | 3  | 0.1428571 | 0.029      | UBE2S   | SHISA7    |
| chr19 | +(55991219..55992321) | 1102 | 2.97166 | 13 | 7  | 6  | 0.0769231 | 0.0013499  | ZNF628  | NAT14     |
| chr19 | +(56174830..56175735) | 905  | 0.14459 | 17 | 11 | 6  | 0.2941176 | 0.01040023 | U2AF2   | EPN1      |
| chr19 | +(56179154..56179901) | 747  | 0.00221 | 19 | 11 | 8  | 0.1578947 | 0.00147643 | U2AF2   | EPN1      |
| chr19 | +(56180935..56181499) | 564  | 0.30033 | 14 | 6  | 8  | 0.1428571 | 0.00097289 | U2AF2   | EPN1      |
| chr19 | +(56300134..56300713) | 579  | 2.97166 | 11 | 5  | 6  | 0.0909091 | 0.81934478 | RFPL4A  | NLRP11    |
| chr19 | +(56361111..56361811) | 700  | 0.0163  | 21 | 9  | 12 | 0.1428571 | 0.00950824 | NLRP4   | NLRP13    |
| chr19 | +(56491492..56492335) | 843  | 0.01114 | 14 | 8  | 6  | 0.1428571 | 0.00097289 | NLRP8   | NLRP5     |
| chr19 | +(56531819..56532327) | 508  | 2.97166 | 9  | 6  | 3  | 0.3333333 | 0.048      | NLRP5   | ZNF787    |

v

|       |                       |      |         |    |    |    |           |            |              |           |
|-------|-----------------------|------|---------|----|----|----|-----------|------------|--------------|-----------|
| chr19 | +(56622643..56623190) | 547  | 2.97166 | 9  | 3  | 6  | 0.3333333 | 0.012      | NLRP5        | ZNF787    |
| chr19 | +(56623355..56623917) | 562  | 0.61721 | 8  | 4  | 4  | 0         | 0.014      | NLRP5        | ZNF787    |
| chr19 | +(56629117..56629804) | 687  | 0.0163  | 13 | 4  | 9  | 0.3846154 | 0.001      | NLRP5        | ZNF787    |
| chr19 | +(56641701..56642401) | 700  | 0.61721 | 11 | 5  | 6  | 0.0909091 | 0.70805879 | ZNF787       | ZNF444    |
| chr19 | +(57133166..57133834) | 668  | 1.34748 | 16 | 7  | 9  | 0.125     | 0.68308053 | ZNF71        | LOC147670 |
| chr19 | +(57646284..57647132) | 848  | 0.06425 | 21 | 9  | 12 | 0.1428571 | 0.12775441 | USP29        | ZIM3      |
| chr19 | +(57671852..57672518) | 666  | 0.30033 | 10 | 6  | 4  | 0.2       | 0.005      | ZIM3         | DUXA      |
| chr19 | +(57766868..57767517) | 649  | 1.34748 | 14 | 7  | 7  | 0         | 0.2031169  | ZNF805       | ZNF460    |
| chr19 | +(57768427..57769184) | 757  | 1.34748 | 20 | 13 | 7  | 0.3       | 0.16095609 | ZNF805       | ZNF460    |
| chr19 | +(57769936..57770567) | 631  | 0.30033 | 11 | 6  | 5  | 0.0909091 | 0.00308495 | ZNF805       | ZNF460    |
| chr19 | +(57773740..57774292) | 552  | 2.97166 | 8  | 4  | 4  | 0         | 0.243      | ZNF805       | ZNF460    |
| chr19 | +(58187453..58188025) | 572  | 1.34748 | 11 | 5  | 6  | 0.0909091 | 0.01422987 | ZSCAN4       | ZNF551    |
| chr19 | +(58192637..58193892) | 1255 | 1.34748 | 13 | 7  | 6  | 0.0769231 | 0.0013499  | ZSCAN4       | ZNF551    |
| chr19 | +(58383874..58384479) | 605  | 1.34748 | 11 | 5  | 6  | 0.0909091 | 0.07206352 | ZNF587       | ZNF814    |
| chr19 | +(58385211..58385733) | 522  | 2.97166 | 11 | 5  | 6  | 0.0909091 | 0.18065522 | ZNF587       | ZNF814    |
| chr19 | +(58386370..58386898) | 528  | 1.34748 | 20 | 7  | 13 | 0.3       | 0.02165575 | ZNF587       | ZNF814    |
| chr19 | +(58388096..58388623) | 527  | 2.97166 | 8  | 3  | 5  | 0.25      | 0.036      | ZNF587       | ZNF814    |
| chr19 | +(58554250..58555562) | 1312 | 1.34748 | 19 | 6  | 13 | 0.3684211 | 0.9996875  | ZSCAN1       | ZNF135    |
| chr19 | +(58557730..58558239) | 509  | 1.34748 | 9  | 5  | 4  | 0.1111111 | 0.008      | ZSCAN1       | ZNF135    |
| chr19 | +(58565255..58565773) | 518  | 1.34748 | 8  | 4  | 4  | 0         | 0.014      | ZSCAN1       | ZNF135    |
| chr19 | +(58567998..58568739) | 741  | 0.0163  | 15 | 8  | 7  | 0.0666667 | 0.00059687 | ZSCAN1       | ZNF135    |
| chr19 | +(58870162..58870730) | 568  | 0.14459 | 10 | 3  | 7  | 0.4       | 0.008      | A1BG-AS1     | ZNF497    |
| chr19 | +(58950994..58951978) | 984  | 2.97166 | 12 | 5  | 7  | 0.1666667 | 0.65762832 | ZNF584       | ZNF132    |
| chr19 | +(58966421..58966924) | 503  | 2.97166 | 10 | 6  | 4  | 0.2       | 0.457      | ZNF324B      | ZNF324    |
| chr19 | +(59058426..59059126) | 700  | 0.06425 | 12 | 8  | 4  | 0.3333333 | 0.99671074 | TRIM28       | CHMP2A    |
| chr20 | +(1629518..1630070)   | 552  | 3.4286  | 18 | 12 | 6  | 0.3333333 | 0.00247894 | SIRPB1       | SIRPG     |
| chr20 | +(1799999..1800637)   | 638  | 0.40887 | 8  | 5  | 3  | 0.25      | 0.018      | LOC100289473 | SIRPA     |
| chr20 | +(1822181..1822867)   | 686  | 0.00662 | 13 | 7  | 6  | 0.0769231 | 0.0013499  | LOC100289473 | SIRPA     |
| chr20 | +(1881358..1881940)   | 582  | 0.89571 | 13 | 7  | 6  | 0.0769231 | 0.0013499  | SIRPA        | PDYN      |
| chr20 | +(1895607..1896435)   | 828  | 0.22026 | 16 | 7  | 9  | 0.125     | 0.0018019  | SIRPA        | PDYN      |
| chr20 | +(2276556..2277690)   | 1134 | 0.03432 | 18 | 11 | 7  | 0.2222222 | 0.00120674 | STK35        | TGM3      |
| chr20 | +(3138450..3139150)   | 700  | 0.18556 | 9  | 3  | 6  | 0.3333333 | 0.012      | AVP          | UBOX5     |
| chr20 | +(3245089..3245593)   | 504  | 2.17504 | 9  | 3  | 6  | 0.3333333 | 0.083      | SLC4A11      | C20orf194 |
| chr20 | +(3659841..3660405)   | 564  | 0.40887 | 10 | 7  | 3  | 0.4       | 0.017      | GFRA4        | ADAM33    |

|       |                       |      |         |    |    |    |           |            |              |           |
|-------|-----------------------|------|---------|----|----|----|-----------|------------|--------------|-----------|
| chr20 | +(3683492..3684028)   | 536  | 0.03432 | 16 | 5  | 11 | 0.375     | 0.96920638 | ADAM33       | SIGLEC1   |
| chr20 | +(3687583..3688102)   | 519  | 0.01563 | 13 | 4  | 9  | 0.3846154 | 0.001      | ADAM33       | SIGLEC1   |
| chr20 | +(3692032..3692696)   | 664  | 2.17504 | 9  | 5  | 4  | 0.1111111 | 0.857      | SIGLEC1      | HSPA12B   |
| chr20 | +(3765477..3766005)   | 528  | 2.17504 | 12 | 8  | 4  | 0.3333333 | 0.976      | SPEF1        | CENPB     |
| chr20 | +(3841687..3842387)   | 700  | 0.18556 | 9  | 3  | 6  | 0.3333333 | 0.012      | MAVS         | PANK2     |
| chr20 | +(4135521..4136100)   | 579  | 0.18556 | 9  | 5  | 4  | 0.1111111 | 0.008      | SMOX         | LOC728228 |
| chr20 | +(4210972..4211931)   | 959  | 0.00662 | 22 | 15 | 7  | 0.3636364 | 0.29851354 | LOC728228    | ADRA1D    |
| chr20 | +(4707710..4708240)   | 530  | 0.89571 | 9  | 4  | 5  | 0.1111111 | 0.008      | PRND         | PRNT      |
| chr20 | +(8626602..8627103)   | 501  | 2.17504 | 6  | 4  | 2  | 0.3333333 | 0.067      | PLCB1        | PLCB4     |
| chr20 | +(8915989..8916630)   | 641  | 0.40887 | 13 | 5  | 8  | 0.2307692 | 0.76789284 | PLCB1        | PLCB4     |
| chr20 | +(9632176..9632688)   | 512  | 2.17504 | 6  | 3  | 3  | 0         | 0.05       | C20orf103    | PAK7      |
| chr20 | +(13397844..13398396) | 552  | 2.17504 | 6  | 4  | 2  | 0.3333333 | 0.067      | ISM1         | TASP1     |
| chr20 | +(13762687..13763360) | 673  | 2.17504 | 9  | 3  | 6  | 0.3333333 | 0.988      | TASP1        | ESF1      |
| chr20 | +(14099623..14100479) | 856  | 0.12313 | 14 | 8  | 6  | 0.1428571 | 0.00097289 | MACROD2      | FLRT3     |
| chr20 | +(14473926..14474440) | 514  | 0.89571 | 14 | 9  | 5  | 0.2857143 | 0.02659758 | FLRT3        | KIF16B    |
| chr20 | +(15531737..15532590) | 853  | 0.03432 | 12 | 6  | 6  | 0         | 0.00197388 | FLRT3        | KIF16B    |
| chr20 | +(15866398..15866903) | 505  | 2.17504 | 17 | 10 | 7  | 0.1764706 | 0.78251642 | FLRT3        | KIF16B    |
| chr20 | +(15991808..15992508) | 700  | 0.18556 | 13 | 4  | 9  | 0.3846154 | 0.001      | FLRT3        | KIF16B    |
| chr20 | +(17417216..17417916) | 700  | 0.03432 | 11 | 7  | 4  | 0.2727273 | 0.003      | PCSK2        | BFSP1     |
| chr20 | +(17580990..17581950) | 960  | 0.89571 | 19 | 11 | 8  | 0.1578947 | 0.4344151  | DSTN         | RRBP1     |
| chr20 | +(17598718..17599282) | 564  | 0.89571 | 8  | 4  | 4  | 0         | 0.171      | DSTN         | RRBP1     |
| chr20 | +(17607073..17607761) | 688  | 0.40887 | 11 | 7  | 4  | 0.2727273 | 0.003      | DSTN         | RRBP1     |
| chr20 | +(18010875..18011575) | 700  | 0.09429 | 10 | 6  | 4  | 0.2       | 0.005      | C20orf72     | OVOL2     |
| chr20 | +(18026823..18027396) | 573  | 0.40887 | 8  | 5  | 3  | 0.25      | 0.018      | C20orf72     | OVOL2     |
| chr20 | +(18492740..18493440) | 700  | 0.03432 | 16 | 11 | 5  | 0.375     | 0.01804853 | SEC23B       | LOC388789 |
| chr20 | +(18534446..18535144) | 698  | 0.18556 | 10 | 7  | 3  | 0.4       | 0.058      | SEC23B       | LOC388789 |
| chr20 | +(18625343..18625948) | 605  | 0.18556 | 9  | 4  | 5  | 0.1111111 | 0.008      | DTD1         | HSPC072   |
| chr20 | +(18639248..18639790) | 542  | 2.17504 | 6  | 2  | 4  | 0.3333333 | 0.067      | DTD1         | HSPC072   |
| chr20 | +(19519876..19521247) | 1371 | 0.89571 | 14 | 7  | 7  | 0         | 0.00087256 | LOC100130264 | RIN2      |
| chr20 | +(20516381..20516914) | 533  | 2.17504 | 9  | 6  | 3  | 0.3333333 | 0.988      | INSM1        | RALGAPA2  |
| chr20 | +(20636005..20636636) | 631  | 2.17504 | 6  | 3  | 3  | 0         | 0.05       | INSM1        | RALGAPA2  |
| chr20 | +(21000057..21001378) | 1321 | 0.09429 | 17 | 10 | 7  | 0.1764706 | 0.00031815 | RALGAPA2     | PLK1S1    |
| chr20 | +(21080976..21081506) | 530  | 0.89571 | 10 | 7  | 3  | 0.4       | 0.992      | RALGAPA2     | PLK1S1    |
| chr20 | +(23668523..23669221) | 698  | 0.89571 | 7  | 4  | 3  | 0.1428571 | 0.029      | CST3         | CST4      |

|       |                       |      |         |    |    |    |           |            |           |           |
|-------|-----------------------|------|---------|----|----|----|-----------|------------|-----------|-----------|
| chr20 | +(24115723..24116291) | 568  | 2.17504 | 10 | 6  | 4  | 0.2       | 0.005      | GGTLC1    | TMEM90B   |
| chr20 | +(24351805..24352434) | 629  | 2.17504 | 6  | 4  | 2  | 0.3333333 | 0.067      | GGTLC1    | TMEM90B   |
| chr20 | +(24431176..24431876) | 700  | 2.17504 | 10 | 4  | 6  | 0.2       | 0.995      | GGTLC1    | TMEM90B   |
| chr20 | +(24471171..24471828) | 657  | 2.17504 | 7  | 3  | 4  | 0.1428571 | 0.2        | TMEM90B   | CST7      |
| chr20 | +(24733585..24734192) | 607  | 2.17504 | 6  | 4  | 2  | 0.3333333 | 0.067      | TMEM90B   | CST7      |
| chr20 | +(24759031..24759669) | 638  | 0.89571 | 7  | 4  | 3  | 0.1428571 | 0.029      | TMEM90B   | CST7      |
| chr20 | +(24773813..24775816) | 2003 | 0.40887 | 22 | 14 | 8  | 0.2727273 | 6.6151E-05 | TMEM90B   | CST7      |
| chr20 | +(24848329..24848870) | 541  | 0.89571 | 7  | 3  | 4  | 0.1428571 | 0.029      | TMEM90B   | CST7      |
| chr20 | +(24948245..24948945) | 700  | 0.01563 | 12 | 4  | 8  | 0.3333333 | 0.00328926 | CST7      | C20orf3   |
| chr20 | +(25021430..25022129) | 699  | 0.40887 | 8  | 3  | 5  | 0.25      | 0.018      | C20orf3   | ACSS1     |
| chr20 | +(25483480..25484010) | 530  | 0.89571 | 11 | 4  | 7  | 0.2727273 | 0.003      | GINS1     | NINL      |
| chr20 | +(25489470..25490361) | 891  | 0.00068 | 16 | 10 | 6  | 0.25      | 0.00056905 | GINS1     | NINL      |
| chr20 | +(25603535..25604235) | 700  | 0.89571 | 10 | 3  | 7  | 0.4       | 0.008      | NINL      | NANP      |
| chr20 | +(25657383..25657968) | 585  | 0.40887 | 14 | 8  | 6  | 0.1428571 | 0.5        | NANP      | ZNF337    |
| chr20 | +(29520348..29520866) | 518  | 0.89571 | 14 | 5  | 9  | 0.2857143 | 0.10263725 | MIR663    | FRG1B     |
| chr20 | +(29623776..29624406) | 630  | 0.21922 | 59 | 34 | 25 | 0.1525424 | 1.9141E-07 | FRG1B     | DEFB115   |
| chr20 | +(29627833..29628832) | 999  | 0.03556 | 78 | 40 | 38 | 0.025641  | 0.06431916 | FRG1B     | DEFB115   |
| chr20 | +(29631133..29632090) | 957  | 0.97277 | 52 | 30 | 22 | 0.1538462 | 0.57347056 | FRG1B     | DEFB115   |
| chr20 | +(29633572..29634409) | 837  | 0.15212 | 61 | 35 | 26 | 0.147541  | 0.0060634  | FRG1B     | DEFB115   |
| chr20 | +(29653259..29653959) | 700  | 0.03432 | 12 | 7  | 5  | 0.1666667 | 0.00224163 | FRG1B     | DEFB115   |
| chr20 | +(30995327..30995847) | 520  | 0.40887 | 9  | 4  | 5  | 0.1111111 | 0.008      | ASXL1     | C20orf112 |
| chr20 | +(31049508..31050208) | 700  | 0.09429 | 10 | 5  | 5  | 0         | 0.00451172 | ASXL1     | C20orf112 |
| chr20 | +(31109272..31109972) | 700  | 0.40887 | 9  | 3  | 6  | 0.3333333 | 0.274      | C20orf112 | LOC149950 |
| chr20 | +(31376554..31377070) | 516  | 2.17504 | 7  | 3  | 4  | 0.1428571 | 0.029      | DNMT3B    | MAPRE1    |
| chr20 | +(31427305..31427871) | 566  | 2.17504 | 7  | 3  | 4  | 0.1428571 | 0.029      | MAPRE1    | SUN5      |
| chr20 | +(31455141..31455841) | 700  | 0.03432 | 11 | 5  | 6  | 0.0909091 | 0.00308495 | MAPRE1    | SUN5      |
| chr20 | +(31485881..31486506) | 625  | 0.89571 | 8  | 5  | 3  | 0.25      | 0.018      | MAPRE1    | SUN5      |
| chr20 | +(31572665..31573297) | 632  | 0.89571 | 9  | 6  | 3  | 0.3333333 | 0.012      | MAPRE1    | SUN5      |
| chr20 | +(31573466..31574284) | 818  | 0.00662 | 18 | 11 | 7  | 0.2222222 | 0.0002444  | MAPRE1    | SUN5      |
| chr20 | +(31673499..31674001) | 502  | 0.40887 | 8  | 3  | 5  | 0.25      | 0.018      | C20orf186 | C20orf70  |
| chr20 | +(31678530..31679087) | 557  | 0.18556 | 9  | 5  | 4  | 0.1111111 | 0.008      | C20orf186 | C20orf70  |
| chr20 | +(32883043..32883616) | 573  | 0.89571 | 7  | 3  | 4  | 0.1428571 | 0.029      | ASIP      | AHCY      |
| chr20 | +(33190114..33190654) | 540  | 2.17504 | 6  | 2  | 4  | 0.3333333 | 0.067      | MAP1LC3A  | PIGU      |
| chr20 | +(33337026..33337691) | 665  | 0.18556 | 12 | 7  | 5  | 0.1666667 | 0.14557611 | TP53INP2  | NCOA6     |

|       |                       |      |         |    |    |    |           |            |          |           |
|-------|-----------------------|------|---------|----|----|----|-----------|------------|----------|-----------|
| chr20 | +(33583006..33584239) | 1233 | 0.40887 | 22 | 14 | 8  | 0.2727273 | 0.00133621 | MIR499   | TRPC4AP   |
| chr20 | +(33595100..33595800) | 700  | 0.09429 | 12 | 8  | 4  | 0.3333333 | 0.533      | MIR499   | TRPC4AP   |
| chr20 | +(33848104..33848661) | 557  | 0.89571 | 8  | 3  | 5  | 0.25      | 0.125      | MMP24    | EIF6      |
| chr20 | +(34187670..34188181) | 511  | 0.89571 | 7  | 3  | 4  | 0.1428571 | 0.029      | ERGIC3   | FER1L4    |
| chr20 | +(34437438..34438122) | 684  | 2.17504 | 10 | 6  | 4  | 0.2       | 0.995      | PHF20    | SCAND1    |
| chr20 | +(34505080..34505593) | 513  | 2.17504 | 8  | 4  | 4  | 0         | 0.057      | PHF20    | SCAND1    |
| chr20 | +(34533212..34533840) | 628  | 0.40887 | 8  | 4  | 4  | 0         | 0.014      | PHF20    | SCAND1    |
| chr20 | +(34730184..34730884) | 700  | 3E-05   | 23 | 7  | 16 | 0.3913043 | 0.29649005 | EPB41L1  | C20orf4   |
| chr20 | +(34761668..34762368) | 700  | 0.03432 | 12 | 6  | 6  | 0         | 0.0186865  | EPB41L1  | C20orf4   |
| chr20 | +(34828097..34828707) | 610  | 0.89571 | 9  | 3  | 6  | 0.3333333 | 0.024      | C20orf4  | DLGAP4    |
| chr20 | +(34964368..34965036) | 668  | 0.18556 | 9  | 6  | 3  | 0.3333333 | 0.012      | C20orf4  | DLGAP4    |
| chr20 | +(35004869..35005476) | 607  | 0.89571 | 11 | 4  | 7  | 0.2727273 | 0.003      | DLGAP4   | MYL9      |
| chr20 | +(35453692..35454392) | 700  | 0.09429 | 10 | 4  | 6  | 0.2       | 0.005      | DSN1     | C20orf117 |
| chr20 | +(35835520..35836097) | 577  | 2.17504 | 7  | 3  | 4  | 0.1428571 | 0.029      | RPN2     | GHRH      |
| chr20 | +(36547304..36547988) | 684  | 0.18556 | 9  | 6  | 3  | 0.3333333 | 0.012      | VSTM2L   | TTI1      |
| chr20 | +(36639947..36640626) | 679  | 2.17504 | 10 | 4  | 6  | 0.2       | 0.457      | VSTM2L   | TTI1      |
| chr20 | +(36776347..36776878) | 531  | 0.89571 | 7  | 4  | 3  | 0.1428571 | 0.029      | RPRD1B   | TGM2      |
| chr20 | +(36850482..36851389) | 907  | 0.00662 | 24 | 15 | 9  | 0.25      | 0.82231968 | TGM2     | KIAA1755  |
| chr20 | +(37049779..37050396) | 617  | 2.17504 | 6  | 2  | 4  | 0.3333333 | 0.067      | LBP      | LOC388796 |
| chr20 | +(37121159..37121704) | 545  | 0.89571 | 10 | 4  | 6  | 0.2       | 0.005      | RALGAPB  | ADIG      |
| chr20 | +(37193635..37194146) | 511  | 2.17504 | 8  | 4  | 4  | 0         | 0.029      | RALGAPB  | ADIG      |
| chr20 | +(37207855..37208555) | 700  | 0.01563 | 15 | 8  | 7  | 0.0666667 | 0.00544818 | RALGAPB  | ADIG      |
| chr20 | +(37481468..37481982) | 514  | 2.17504 | 6  | 3  | 3  | 0         | 0.05       | PPP1R16B | FAM83D    |
| chr20 | +(37507199..37508146) | 947  | 0.09429 | 16 | 10 | 6  | 0.25      | 0.00056905 | PPP1R16B | FAM83D    |
| chr20 | +(39830656..39831191) | 535  | 0.89571 | 10 | 6  | 4  | 0.2       | 0.033      | PLCG1    | ZHX3      |
| chr20 | +(42340683..42341880) | 1197 | 0.09429 | 19 | 8  | 11 | 0.1578947 | 0.62940925 | MYBL2    | GTSF1L    |
| chr20 | +(42345608..42346290) | 682  | 0.40887 | 8  | 4  | 4  | 0         | 0.014      | MYBL2    | GTSF1L    |
| chr20 | +(42789104..42789804) | 700  | 0.89571 | 12 | 7  | 5  | 0.1666667 | 0.99775837 | TOX2     | JPH2      |
| chr20 | +(43032145..43032766) | 621  | 0.40887 | 8  | 5  | 3  | 0.25      | 0.018      | HNF4A    | MIR3646   |
| chr20 | +(43231760..43232460) | 700  | 0.09429 | 10 | 3  | 7  | 0.4       | 0.008      | PKIG     | ADA       |
| chr20 | +(43953769..43954411) | 642  | 0.40887 | 8  | 5  | 3  | 0.25      | 0.018      | RBPJL    | SDC4      |
| chr20 | +(44505564..44506171) | 607  | 2.17504 | 6  | 3  | 3  | 0         | 0.05       | ZSWIM3   | ZSWIM1    |
| chr20 | +(44508313..44509047) | 734  | 0.00662 | 13 | 6  | 7  | 0.0769231 | 0.0013499  | ZSWIM3   | ZSWIM1    |
| chr20 | +(44591933..44592997) | 1064 | 0.00662 | 22 | 11 | 11 | 0         | 3.5526E-05 | PCIF1    | ZNF335    |

|       |                       |      |         |    |    |    |           |            |          |                |
|-------|-----------------------|------|---------|----|----|----|-----------|------------|----------|----------------|
| chr20 | +(45864970..45865627) | 657  | 0.89571 | 10 | 7  | 3  | 0.4       | 0.192      | MIR3616  | ZMYND8         |
| chr20 | +(45974285..45974985) | 700  | 0.01563 | 12 | 7  | 5  | 0.1666667 | 0.00224163 | MIR3616  | ZMYND8         |
| chr20 | +(46365168..46365720) | 552  | 0.89571 | 8  | 4  | 4  | 0         | 0.014      | NCOA3    | SULF2          |
| chr20 | +(46374109..46375325) | 1216 | 0.03432 | 17 | 6  | 11 | 0.2941176 | 0.00045556 | NCOA3    | SULF2          |
| chr20 | +(46454031..46454718) | 687  | 2.17504 | 9  | 6  | 3  | 0.3333333 | 0.988      | SULF2    | LOC284749      |
| chr20 | +(46485630..46486330) | 700  | 0.40887 | 12 | 4  | 8  | 0.3333333 | 0.00328926 | SULF2    | LOC284749      |
| chr20 | +(46508701..46509401) | 700  | 2.17504 | 11 | 6  | 5  | 0.0909091 | 0.99691505 | SULF2    | LOC284749      |
| chr20 | +(46584820..46586110) | 1290 | 0.18556 | 16 | 9  | 7  | 0.125     | 0.99957245 | SULF2    | LOC284749      |
| chr20 | +(46666903..46667564) | 661  | 0.89571 | 9  | 6  | 3  | 0.3333333 | 0.274      | SULF2    | LOC284749      |
| chr20 | +(46789703..46790292) | 589  | 2.17504 | 6  | 3  | 3  | 0         | 0.05       | SULF2    | LOC284749      |
| chr20 | +(47714313..47714989) | 676  | 0.09429 | 12 | 6  | 6  | 0         | 0.00197388 | CSE1L    | STAU1          |
| chr20 | +(47739575..47740149) | 574  | 0.18556 | 10 | 4  | 6  | 0.2       | 0.005      | CSE1L    | STAU1          |
| chr20 | +(47847235..47847944) | 709  | 0.00143 | 15 | 5  | 10 | 0.3333333 | 0.00109982 | DDX27    | ZNFX1          |
| chr20 | +(47864494..47865011) | 517  | 0.89571 | 12 | 8  | 4  | 0.3333333 | 0.467      | DDX27    | ZNFX1          |
| chr20 | +(47887457..47888313) | 856  | 0.00662 | 22 | 11 | 11 | 0         | 0.00057618 | DDX27    | ZNFX1          |
| chr20 | +(47991079..47991715) | 636  | 2.17504 | 7  | 4  | 3  | 0.1428571 | 0.029      | SNORD12  | KCNB1          |
| chr20 | +(48439353..48439877) | 524  | 0.89571 | 10 | 5  | 5  | 0         | 0.00451172 | SLC9A8   | SPATA2         |
| chr20 | +(48521961..48522465) | 504  | 2.17504 | 9  | 5  | 4  | 0.1111111 | 0.056      | SLC9A8   | SPATA2         |
| chr20 | +(48744888..48746113) | 1225 | 0.40887 | 15 | 8  | 7  | 0.0666667 | 0.00059687 | UBE2V1   | TMEM189-UBE2V1 |
| chr20 | +(48759233..48759907) | 674  | 0.18556 | 9  | 6  | 3  | 0.3333333 | 0.012      | UBE2V1   | TMEM189-UBE2V1 |
| chr20 | +(48762359..48763059) | 700  | 0.00662 | 13 | 8  | 5  | 0.2307692 | 0.0017074  | UBE2V1   | TMEM189-UBE2V1 |
| chr20 | +(48766028..48766898) | 870  | 0.00143 | 15 | 9  | 6  | 0.2       | 0.00073136 | UBE2V1   | TMEM189-UBE2V1 |
| chr20 | +(49217790..49219095) | 1305 | 0.00068 | 23 | 8  | 15 | 0.3043478 | 0.4232253  | MIR645   | FAM65C         |
| chr20 | +(49462222..49462922) | 700  | 2.17504 | 10 | 4  | 6  | 0.2       | 0.005      | BCAS4    | ADNP           |
| chr20 | +(49462961..49463632) | 671  | 2.17504 | 10 | 4  | 6  | 0.2       | 0.005      | BCAS4    | ADNP           |
| chr20 | +(49503539..49504129) | 590  | 2.17504 | 6  | 2  | 4  | 0.3333333 | 0.067      | BCAS4    | ADNP           |
| chr20 | +(49508199..49508899) | 700  | 0.03556 | 20 | 6  | 14 | 0.4       | 0.02891344 | BCAS4    | ADNP           |
| chr20 | +(50048544..50049136) | 592  | 0.89571 | 8  | 5  | 3  | 0.25      | 0.018      | KCNG1    | NFATC2         |
| chr20 | +(50100959..50101649) | 690  | 2.17504 | 6  | 3  | 3  | 0         | 0.05       | KCNG1    | NFATC2         |
| chr20 | +(50224990..50225511) | 521  | 2.17504 | 9  | 6  | 3  | 0.3333333 | 0.19       | MIR3194  | ATP9A          |
| chr20 | +(51940337..51940998) | 661  | 0.18556 | 9  | 6  | 3  | 0.3333333 | 0.012      | TSHZ2    | ZNF217         |
| chr20 | +(52198837..52199387) | 550  | 2.17504 | 10 | 5  | 5  | 0         | 0.23235105 | TSHZ2    | ZNF217         |
| chr20 | +(52636126..52636715) | 589  | 0.40887 | 8  | 4  | 4  | 0         | 0.014      | SUMO1P1  | BCAS1          |
| chr20 | +(55071451..55071984) | 533  | 2.17504 | 9  | 3  | 6  | 0.3333333 | 0.643      | C20orf43 | GCNT7          |

|       |                       |      |         |    |    |    |           |            |           |              |   |
|-------|-----------------------|------|---------|----|----|----|-----------|------------|-----------|--------------|---|
| chr20 | +(55072339..55073436) | 1097 | 0.00383 | 20 | 14 | 6  | 0.4       | 0.999734   | C20orf43  | GCNT7        |   |
| chr20 | +(55205471..55206171) | 700  | 0.18556 | 13 | 4  | 9  | 0.3846154 | 0.001      | TFAP2C    | BMP7         | v |
| chr20 | +(55619745..55620727) | 982  | 0.89571 | 13 | 7  | 6  | 0.0769231 | 0.0013499  | TFAP2C    | BMP7         | v |
| chr20 | +(56273522..56274181) | 659  | 0.40887 | 8  | 3  | 5  | 0.25      | 0.018      | ZBP1      | PMEPA1       |   |
| chr20 | +(56443631..56444155) | 524  | 2.17504 | 6  | 3  | 3  | 0         | 0.05       | PMEPA1    | C20orf85     |   |
| chr20 | +(56688758..56689307) | 549  | 0.40887 | 8  | 5  | 3  | 0.25      | 0.018      | PMEPA1    | C20orf85     |   |
| chr20 | +(56735408..56736050) | 642  | 0.40887 | 8  | 4  | 4  | 0         | 0.014      | C20orf85  | PPP4R1L      |   |
| chr20 | +(56744392..56745092) | 700  | 0.40887 | 13 | 5  | 8  | 0.2307692 | 0.07161746 | C20orf85  | PPP4R1L      |   |
| chr20 | +(57035564..57036148) | 584  | 2.17504 | 6  | 3  | 3  | 0         | 0.05       | VAPB      | APCDD1L      |   |
| chr20 | +(58383144..58383704) | 560  | 0.18556 | 9  | 6  | 3  | 0.3333333 | 0.012      | PHACTR3   | SYCP2        |   |
| chr20 | +(58419993..58420589) | 596  | 0.40887 | 13 | 5  | 8  | 0.2307692 | 0.0017074  | PHACTR3   | SYCP2        |   |
| chr20 | +(59069009..59069718) | 709  | 0.00383 | 14 | 7  | 7  | 0         | 0.00087256 | C20orf197 | CDH4         |   |
| chr20 | +(59378568..59379268) | 700  | 0.03432 | 11 | 6  | 5  | 0.0909091 | 0.00308495 | C20orf197 | CDH4         |   |
| chr20 | +(59875095..59875948) | 853  | 0.40887 | 20 | 8  | 12 | 0.2       | 0.00010641 | CDH4      | MIR1257      |   |
| chr20 | +(60083255..60083786) | 531  | 2.17504 | 6  | 3  | 3  | 0         | 0.05       | CDH4      | MIR1257      |   |
| chr20 | +(60100995..60102374) | 1379 | 0.03432 | 17 | 6  | 11 | 0.2941176 | 0.00045556 | CDH4      | MIR1257      |   |
| chr20 | +(60302947..60303882) | 935  | 0.89571 | 15 | 6  | 9  | 0.2       | 0.03854994 | CDH4      | MIR1257      |   |
| chr20 | +(60377715..60378415) | 700  | 0.03432 | 11 | 6  | 5  | 0.0909091 | 0.00308495 | CDH4      | MIR1257      |   |
| chr20 | +(60429412..60430203) | 791  | 0.03432 | 16 | 7  | 9  | 0.125     | 0.02510048 | CDH4      | MIR1257      |   |
| chr20 | +(60579480..60580180) | 700  | 0.89571 | 10 | 7  | 3  | 0.4       | 0.992      | MIR1257   | TAF4         |   |
| chr20 | +(60642473..60642990) | 517  | 0.18556 | 9  | 5  | 4  | 0.1111111 | 0.008      | TAF4      | LSM14B       |   |
| chr20 | +(60754562..60755234) | 672  | 0.89571 | 7  | 3  | 4  | 0.1428571 | 0.029      | SS18L1    | GTPBP5       |   |
| chr20 | +(60768113..60768695) | 582  | 2.17504 | 6  | 4  | 2  | 0.3333333 | 0.067      | GTPBP5    | HRH3         |   |
| chr20 | +(60798383..60798920) | 537  | 2.17504 | 6  | 3  | 3  | 0         | 0.05       | HRH3      | OSBPL2       |   |
| chr20 | +(60819831..60820355) | 524  | 0.89571 | 7  | 4  | 3  | 0.1428571 | 0.029      | OSBPL2    | ADRM1        |   |
| chr20 | +(60847965..60848665) | 700  | 0.18556 | 11 | 4  | 7  | 0.2727273 | 0.003      | OSBPL2    | ADRM1        |   |
| chr20 | +(60886723..60887328) | 605  | 0.89571 | 12 | 6  | 6  | 0         | 0.00197388 | ADRM1     | LAMA5        |   |
| chr20 | +(60947403..60947979) | 576  | 2.17504 | 9  | 3  | 6  | 0.3333333 | 0.012      | LAMA5     | RPS21        |   |
| chr20 | +(61167167..61168293) | 1126 | 0.40887 | 15 | 8  | 7  | 0.0666667 | 0.99245637 | MIR133A2  | SLCO4A1      |   |
| chr20 | +(61196880..61197583) | 703  | 0.01563 | 12 | 7  | 5  | 0.1666667 | 0.00224163 | MIR133A2  | SLCO4A1      |   |
| chr20 | +(61271304..61272004) | 700  | 2.17504 | 12 | 5  | 7  | 0.1666667 | 0.99775837 | MIR133A2  | SLCO4A1      |   |
| chr20 | +(61295285..61295806) | 521  | 0.40887 | 13 | 8  | 5  | 0.2307692 | 0.0017074  | SLCO4A1   | LOC100127888 |   |
| chr20 | +(61387203..61388216) | 1013 | 0.18556 | 17 | 8  | 9  | 0.0588235 | 0.000266   | NTSR1     | C20orf20     |   |
| chr20 | +(61391244..61391944) | 700  | 0.09429 | 11 | 7  | 4  | 0.2727273 | 0.115      | NTSR1     | C20orf20     |   |



|       |                       |      |         |    |    |    |           |            |              |              |
|-------|-----------------------|------|---------|----|----|----|-----------|------------|--------------|--------------|
| chr20 | +(61439160..61439860) | 700  | 0.01563 | 13 | 7  | 6  | 0.0769231 | 0.0013499  | OGFR         | COL9A3       |
| chr20 | +(61588888..61589425) | 537  | 2.17504 | 9  | 6  | 3  | 0.3333333 | 0.988      | SLC17A9      | BHLHE23      |
| chr20 | +(61839857..61840441) | 584  | 0.09429 | 10 | 5  | 5  | 0         | 0.00451172 | MIR124-3     | YTHDF1       |
| chr20 | +(61888906..61889606) | 700  | 0.01563 | 12 | 5  | 7  | 0.1666667 | 0.00224163 | FLJ16779     | ARFGAP1      |
| chr20 | +(61900505..61901210) | 705  | 0.09429 | 14 | 5  | 9  | 0.2857143 | 0.0013499  | FLJ16779     | ARFGAP1      |
| chr20 | +(62088309..62089334) | 1025 | 0.18556 | 15 | 9  | 6  | 0.2       | 0.00073136 | CHRNA4       | KCNQ2        |
| chr20 | +(62094686..62095309) | 623  | 0.89571 | 8  | 5  | 3  | 0.25      | 0.125      | CHRNA4       | KCNQ2        |
| chr20 | +(62108717..62109340) | 623  | 0.89571 | 7  | 4  | 3  | 0.1428571 | 0.029      | KCNQ2        | EEF1A2       |
| chr20 | +(62129108..62129806) | 698  | 2.17504 | 10 | 6  | 4  | 0.2       | 0.995      | KCNQ2        | EEF1A2       |
| chr20 | +(62293899..62294516) | 617  | 0.22026 | 13 | 8  | 5  | 0.2307692 | 0.0017074  | RTEL1        | TNFRSF6B     |
| chr20 | +(62387144..62387683) | 539  | 2.17504 | 6  | 4  | 2  | 0.3333333 | 0.067      | SLC2A4RG     | ZBTB46       |
| chr20 | +(62681924..62683288) | 1364 | 0.18556 | 16 | 7  | 9  | 0.125     | 0.99957245 | SOX18        | TCEA2        |
| chr20 | +(62703177..62703704) | 527  | 0.40887 | 8  | 3  | 5  | 0.25      | 0.018      | TCEA2        | RGS19        |
| chr21 | +(9906128..9906831)   | 703  | 0.31351 | 12 | 5  | 7  | 0.1666667 | 0.04407898 | MIR3687      | LOC100132288 |
| chr21 | +(9911891..9912899)   | 1008 | 1.69869 | 11 | 5  | 6  | 0.0909091 | 0.99691505 | MIR3687      | LOC100132288 |
| chr21 | +(9954638..9955715)   | 1077 | 0.31351 | 15 | 7  | 8  | 0.0666667 | 0.00059687 | MIR3687      | LOC100132288 |
| chr21 | +(10213960..10214477) | 517  | 4.76807 | 7  | 3  | 4  | 0.1428571 | 0.057      | LOC100132288 | TPTE         |
| chr21 | +(10850869..10851553) | 684  | 0.8348  | 8  | 3  | 5  | 0.25      | 0.018      | LOC100132288 | TPTE         |
| chr21 | +(10857386..10857887) | 501  | 1.69869 | 6  | 3  | 3  | 0         | 0.05       | LOC100132288 | TPTE         |
| chr21 | +(10933590..10934484) | 894  | 1.5E-05 | 55 | 21 | 34 | 0.2363636 | 3.9274E-08 | LOC100132288 | TPTE         |
| chr21 | +(10944460..10945287) | 827  | 0.31351 | 15 | 8  | 7  | 0.0666667 | 0.00544818 | LOC100132288 | TPTE         |
| chr21 | +(10959560..10960072) | 512  | 1.69869 | 12 | 5  | 7  | 0.1666667 | 0.00368558 | LOC100132288 | TPTE         |
| chr21 | +(10998022..10998550) | 528  | 2.71744 | 26 | 15 | 11 | 0.1538462 | 6.8189E-05 | TPTE         | BAGE2        |
| chr21 | +(11015272..11015789) | 517  | 4.7703  | 19 | 12 | 7  | 0.2631579 | 0.03148953 | TPTE         | BAGE2        |
| chr21 | +(11020496..11021363) | 867  | 1.24958 | 49 | 25 | 24 | 0.0204082 | 0.00090426 | TPTE         | BAGE2        |
| chr21 | +(11026559..11027061) | 502  | 4.7703  | 20 | 13 | 7  | 0.3       | 0.00037882 | TPTE         | BAGE2        |
| chr21 | +(11038825..11039689) | 864  | 0.15769 | 48 | 23 | 25 | 0.0416667 | 0.01191639 | TPTE         | BAGE2        |
| chr21 | +(11113136..11113654) | 518  | 1.69869 | 7  | 4  | 3  | 0.1428571 | 0.029      | BAGE         | ANKRD30BP2   |
| chr21 | +(11139751..11140284) | 533  | 4.76807 | 5  | 2  | 3  | 0.2       | 0.1        | BAGE         | ANKRD30BP2   |
| chr21 | +(11143360..11143978) | 618  | 1.69869 | 10 | 6  | 4  | 0.2       | 0.762      | BAGE         | ANKRD30BP2   |
| chr21 | +(11144245..11145856) | 1611 | 0.00351 | 24 | 15 | 9  | 0.25      | 2.8497E-05 | BAGE         | ANKRD30BP2   |
| chr21 | +(14417467..14417971) | 504  | 3.31233 | 28 | 18 | 10 | 0.2857143 | 1.5141E-05 | ANKRD30BP2   | MIR3156-3    |
| chr21 | +(14768309..14768826) | 517  | 1.69869 | 9  | 6  | 3  | 0.3333333 | 0.012      | ANKRD30BP2   | MIR3156-3    |
| chr21 | +(14771685..14772230) | 545  | 4.76807 | 8  | 5  | 3  | 0.25      | 0.018      | ANKRD30BP2   | MIR3156-3    |

|       |                       |      |         |    |    |    |           |            |            |           |
|-------|-----------------------|------|---------|----|----|----|-----------|------------|------------|-----------|
| chr21 | +(14995109..14995617) | 508  | 4.76807 | 8  | 5  | 3  | 0.25      | 0.036      | POTED      | C21orf15  |
| chr21 | +(15003001..15003794) | 793  | 0.00257 | 38 | 23 | 15 | 0.2105263 | 0.00025149 | POTED      | C21orf15  |
| chr21 | +(15011450..15012066) | 616  | 0.8348  | 12 | 6  | 6  | 0         | 0.00815459 | POTED      | C21orf15  |
| chr21 | +(16337050..16337610) | 560  | 0.8348  | 11 | 7  | 4  | 0.2727273 | 0.264      | SAMSN1     | NRIP1     |
| chr21 | +(18931112..18931629) | 517  | 0.8348  | 9  | 6  | 3  | 0.3333333 | 0.012      | CXADR      | BTG3      |
| chr21 | +(19725876..19726408) | 532  | 4.76807 | 7  | 3  | 4  | 0.1428571 | 0.029      | CHODL      | TMPRSS15  |
| chr21 | +(20229855..20230447) | 592  | 1.69869 | 6  | 2  | 4  | 0.3333333 | 0.067      | TMPRSS15   | C21orf131 |
| chr21 | +(21112034..21112543) | 509  | 0.8348  | 10 | 4  | 6  | 0.2       | 0.129      | TMPRSS15   | C21orf131 |
| chr21 | +(27113695..27114473) | 778  | 1.69869 | 13 | 6  | 7  | 0.0769231 | 0.05804158 | GABPA      | APP       |
| chr21 | +(28296453..28296985) | 532  | 4.76807 | 8  | 4  | 4  | 0         | 0.057      | ADAMTS1    | ADAMTS5   |
| chr21 | +(30332552..30333103) | 551  | 4.76807 | 5  | 2  | 3  | 0.2       | 0.1        | N6AMT1     | LTN1      |
| chr21 | +(31802679..31803185) | 506  | 4.76807 | 9  | 4  | 5  | 0.1111111 | 0.365      | KRTAP13-4  | KRTAP15-1 |
| chr21 | +(31812728..31813230) | 502  | 4.76807 | 6  | 3  | 3  | 0         | 0.2        | KRTAP15-1  | KRTAP19-1 |
| chr21 | +(33044029..33044576) | 547  | 2.07249 | 13 | 7  | 6  | 0.0769231 | 0.12654896 | SOD1       | SFRS15    |
| chr21 | +(33074337..33075374) | 1037 | 0.31351 | 16 | 10 | 6  | 0.25      | 0.97455309 | SOD1       | SFRS15    |
| chr21 | +(33948062..33949030) | 968  | 0.31351 | 15 | 8  | 7  | 0.0666667 | 0.05259626 | C21orf63   | TCP10L    |
| chr21 | +(33981961..33982527) | 566  | 0.8348  | 10 | 5  | 5  | 0         | 0.03790009 | TCP10L     | C21orf59  |
| chr21 | +(34165722..34166546) | 824  | 1.69869 | 11 | 5  | 6  | 0.0909091 | 0.57243393 | C21orf49   | C21orf62  |
| chr21 | +(34615759..34616284) | 525  | 0.8348  | 10 | 4  | 6  | 0.2       | 0.005      | IFNAR2     | IL10RB    |
| chr21 | +(35470116..35470664) | 548  | 1.69869 | 6  | 2  | 4  | 0.3333333 | 0.067      | SLC5A3     | C21orf82  |
| chr21 | +(35472499..35473006) | 507  | 1.69869 | 9  | 6  | 3  | 0.3333333 | 0.024      | SLC5A3     | C21orf82  |
| chr21 | +(35475459..35476103) | 644  | 1.69869 | 11 | 5  | 6  | 0.0909091 | 0.02230486 | SLC5A3     | C21orf82  |
| chr21 | +(35852773..35853387) | 614  | 4.76807 | 5  | 2  | 3  | 0.2       | 0.1        | FAM165B    | KCNE1     |
| chr21 | +(36231385..36232046) | 661  | 1.69869 | 9  | 3  | 6  | 0.3333333 | 0.048      | NCRNA00160 | RUNX1     |
| chr21 | +(36264991..36265495) | 504  | 4.76807 | 5  | 3  | 2  | 0.2       | 0.1        | NCRNA00160 | RUNX1     |
| chr21 | +(37422465..37423053) | 588  | 1.69869 | 9  | 5  | 4  | 0.1111111 | 0.143      | MIR802     | SETD4     |
| chr21 | +(37637178..37637879) | 701  | 0.06448 | 10 | 6  | 4  | 0.2       | 0.005      | DOPEY2     | MORC3     |
| chr21 | +(37692106..37692734) | 628  | 0.31351 | 8  | 3  | 5  | 0.25      | 0.018      | DOPEY2     | MORC3     |
| chr21 | +(37741544..37742049) | 505  | 4.76807 | 6  | 2  | 4  | 0.3333333 | 0.067      | MORC3      | CHAF1B    |
| chr21 | +(37833029..37833549) | 520  | 4.76807 | 9  | 4  | 5  | 0.1111111 | 0.008      | CHAF1B     | CLDN14    |
| chr21 | +(37857885..37858414) | 529  | 1.69869 | 12 | 6  | 6  | 0         | 0.05465729 | CHAF1B     | CLDN14    |
| chr21 | +(38441656..38442182) | 526  | 4.76807 | 8  | 5  | 3  | 0.25      | 0.286      | DSCR6      | PIGP      |
| chr21 | +(38560721..38561324) | 603  | 4.76807 | 8  | 5  | 3  | 0.25      | 0.286      | TTC3       | DSCR9     |
| chr21 | +(39811109..39811648) | 539  | 1.69869 | 6  | 4  | 2  | 0.3333333 | 0.067      | KCNJ15     | ERG       |

|       |                       |      |         |    |    |    |           |            |            |            |
|-------|-----------------------|------|---------|----|----|----|-----------|------------|------------|------------|
| chr21 | +(40636242..40636809) | 567  | 1.69869 | 6  | 2  | 4  | 0.3333333 | 0.067      | PSMG1      | BRWD1      |
| chr21 | +(40667807..40668507) | 700  | 0.8348  | 10 | 3  | 7  | 0.4       | 0.058      | PSMG1      | BRWD1      |
| chr21 | +(40759625..40760126) | 501  | 4.76807 | 6  | 3  | 3  | 0         | 0.05       | WRB        | LCA5L      |
| chr21 | +(42749480..42749986) | 506  | 1.69869 | 6  | 2  | 4  | 0.3333333 | 0.067      | MX2        | MX1        |
| chr21 | +(42774998..42775698) | 700  | 0.06448 | 11 | 4  | 7  | 0.2727273 | 0.003      | MX2        | MX1        |
| chr21 | +(42780869..42781459) | 590  | 4.76807 | 5  | 3  | 2  | 0.2       | 0.1        | MX2        | MX1        |
| chr21 | +(44474554..44475132) | 578  | 4.76807 | 5  | 2  | 3  | 0.2       | 0.1        | PKNOX1     | CBS        |
| chr21 | +(44985162..44985825) | 663  | 0.8348  | 9  | 5  | 4  | 0.1111111 | 0.008      | C21orf84   | HSF2BP     |
| chr21 | +(45292767..45293992) | 1225 | 1.69869 | 11 | 6  | 5  | 0.0909091 | 0.99691505 | AGPAT3     | TRAPPC10   |
| chr21 | +(45546616..45547127) | 511  | 4.76807 | 6  | 2  | 4  | 0.3333333 | 0.067      | PWP2       | C21orf33   |
| chr21 | +(45550084..45551141) | 1057 | 0.00464 | 19 | 8  | 11 | 0.1578947 | 0.00013997 | PWP2       | C21orf33   |
| chr21 | +(45752762..45753879) | 1117 | 0.8348  | 12 | 5  | 7  | 0.1666667 | 0.40377055 | PFKL       | C21orf2    |
| chr21 | +(45878251..45878952) | 701  | 0.31351 | 14 | 9  | 5  | 0.2857143 | 0.15865525 | LRRC3      | C21orf29   |
| chr21 | +(45898675..45899337) | 662  | 4.76807 | 5  | 3  | 2  | 0.2       | 0.1        | LRRC3      | C21orf29   |
| chr21 | +(46021313..46021840) | 527  | 0.8348  | 11 | 4  | 7  | 0.2727273 | 0.158      | LRRC3      | C21orf29   |
| chr21 | +(46036804..46037319) | 515  | 1.69869 | 6  | 4  | 2  | 0.3333333 | 0.067      | LRRC3      | C21orf29   |
| chr21 | +(46057189..46058260) | 1071 | 0.15769 | 23 | 12 | 11 | 0.0434783 | 0.75079804 | LRRC3      | C21orf29   |
| chr21 | +(46066296..46066831) | 535  | 0.31351 | 14 | 9  | 5  | 0.2857143 | 0.06259688 | LRRC3      | C21orf29   |
| chr21 | +(46069523..46070784) | 1261 | 0.8348  | 13 | 7  | 6  | 0.0769231 | 0.0013499  | LRRC3      | C21orf29   |
| chr21 | +(46101678..46102191) | 513  | 0.31351 | 9  | 4  | 5  | 0.1111111 | 0.016      | LRRC3      | C21orf29   |
| chr21 | +(46131139..46131670) | 531  | 0.8348  | 7  | 3  | 4  | 0.1428571 | 0.029      | LRRC3      | C21orf29   |
| chr21 | +(46338105..46338829) | 724  | 0.01104 | 12 | 5  | 7  | 0.1666667 | 0.00224163 | PTTG1IP    | ITGB2      |
| chr21 | +(46367109..46367804) | 695  | 1.69869 | 10 | 6  | 4  | 0.2       | 0.995      | C21orf70   | NCRNA00163 |
| chr21 | +(46409087..46409787) | 700  | 0.06448 | 10 | 6  | 4  | 0.2       | 0.005      | C21orf70   | NCRNA00163 |
| chr21 | +(46491902..46492478) | 576  | 1.69869 | 6  | 2  | 4  | 0.3333333 | 0.067      | NCRNA00162 | C21orf122  |
| chr21 | +(46548086..46548642) | 556  | 4.76807 | 9  | 4  | 5  | 0.1111111 | 0.008      | ADARB1     | POFUT2     |
| chr21 | +(46887956..46888516) | 560  | 1.69869 | 6  | 4  | 2  | 0.3333333 | 0.067      | NCRNA00175 | SLC19A1    |
| chr21 | +(46943508..46944103) | 595  | 1.69869 | 6  | 3  | 3  | 0         | 0.05       | NCRNA00175 | SLC19A1    |
| chr21 | +(46996786..46997328) | 542  | 1.69869 | 6  | 3  | 3  | 0         | 0.05       | SLC19A1    | PCBP3      |
| chr21 | +(47025835..47026535) | 700  | 0.06448 | 12 | 6  | 6  | 0         | 0.00197388 | SLC19A1    | PCBP3      |
| chr21 | +(47295894..47296490) | 596  | 1.69869 | 11 | 7  | 4  | 0.2727273 | 0.036      | PCBP3      | COL6A1     |
| chr21 | +(47570381..47570942) | 561  | 1.69869 | 6  | 4  | 2  | 0.3333333 | 0.067      | COL6A2     | FTCD       |
| chr21 | +(47600285..47600804) | 519  | 1.69869 | 6  | 4  | 2  | 0.3333333 | 0.067      | FTCD       | C21orf56   |
| chr21 | +(47690244..47690940) | 696  | 0.15769 | 11 | 4  | 7  | 0.2727273 | 0.003      | MCM3AP-AS1 | MCM3AP     |

|       |                       |      |         |     |    |    |           |            |          |              |
|-------|-----------------------|------|---------|-----|----|----|-----------|------------|----------|--------------|
| chr21 | +(47772221..47773266) | 1045 | 1.69869 | 12  | 6  | 6  | 0         | 0.00197388 | PCNT     | DIP2A        |
| chr21 | +(47811056..47811756) | 700  | 1.69869 | 7   | 3  | 4  | 0.1428571 | 0.029      | PCNT     | DIP2A        |
| chr21 | +(47850312..47850997) | 685  | 1.69869 | 6   | 3  | 3  | 0         | 0.05       | PCNT     | DIP2A        |
| chr22 | +(16257918..16258612) | 694  | 0.24081 | 50  | 29 | 21 | 0.16      | 1.7457E-09 |          | POTEH        |
| chr22 | +(16266570..16267141) | 571  | 0.44654 | 63  | 34 | 29 | 0.0793651 | 0.00604053 |          | POTEH        |
| chr22 | +(16267780..16268672) | 892  | 0.00438 | 144 | 74 | 70 | 0.0277778 | 1.6573E-08 |          | POTEH        |
| chr22 | +(16275015..16275681) | 666  | 1.05638 | 30  | 17 | 13 | 0.1333333 | 0.00050926 |          | POTEH        |
| chr22 | +(16278817..16279504) | 687  | 0.19846 | 58  | 24 | 34 | 0.1724138 | 5.3473E-07 |          | POTEH        |
| chr22 | +(16282208..16282849) | 641  | 0.19577 | 73  | 34 | 39 | 0.0684932 | 0.16799856 |          | POTEH        |
| chr22 | +(16345617..16346192) | 575  | 0.95339 | 10  | 4  | 6  | 0.2       | 0.005      | POTEH    | OR11H1       |
| chr22 | +(16350256..16350846) | 590  | 3.79571 | 19  | 8  | 11 | 0.1578947 | 0.22869527 | POTEH    | OR11H1       |
| chr22 | +(16352608..16353168) | 560  | 1.95252 | 9   | 5  | 4  | 0.1111111 | 0.206      | POTEH    | OR11H1       |
| chr22 | +(16353231..16353906) | 675  | 0.95339 | 10  | 7  | 3  | 0.4       | 0.008      | POTEH    | OR11H1       |
| chr22 | +(16365744..16366248) | 504  | 3.79571 | 15  | 6  | 9  | 0.2       | 0.02256348 | POTEH    | OR11H1       |
| chr22 | +(16448493..16449690) | 1197 | 0.01468 | 96  | 63 | 33 | 0.3125    | 0.07733532 | POTEH    | OR11H1       |
| chr22 | +(17621678..17622354) | 676  | 0.0754  | 10  | 5  | 5  | 0         | 0.00451172 | CECR6    | CECR5        |
| chr22 | +(18232734..18233434) | 700  | 0.0754  | 11  | 4  | 7  | 0.2727273 | 0.003      | BCL2L13  | BID          |
| chr22 | +(18256470..18257152) | 682  | 1.95252 | 9   | 6  | 3  | 0.3333333 | 0.988      | BCL2L13  | BID          |
| chr22 | +(18308681..18309381) | 700  | 0.39879 | 12  | 6  | 6  | 0         | 0.00197388 | MIR3198  | MICAL3       |
| chr22 | +(19058146..19058870) | 724  | 0.01468 | 12  | 6  | 6  | 0         | 0.00197388 | DGCR10   | DGCR2        |
| chr22 | +(19902747..19903297) | 550  | 1.95252 | 6   | 2  | 4  | 0.3333333 | 0.067      | C22orf29 | TXNRD2       |
| chr22 | +(19963891..19964483) | 592  | 0.95339 | 7   | 3  | 4  | 0.1428571 | 0.029      | COMT     | ARVCF        |
| chr22 | +(20092732..20093483) | 751  | 0.00229 | 15  | 8  | 7  | 0.0666667 | 0.00059687 | MIR1306  | TRMT2A       |
| chr22 | +(21779817..21780488) | 671  | 0.95339 | 7   | 3  | 4  | 0.1428571 | 0.029      | HIC2     | PI4KAP2      |
| chr22 | +(21838094..21838648) | 554  | 0.95339 | 10  | 5  | 5  | 0         | 0.01414006 | HIC2     | PI4KAP2      |
| chr22 | +(21901590..21902116) | 526  | 1.95252 | 9   | 5  | 4  | 0.1111111 | 0.032      | PI4KAP2  | RIMBP3B_dup2 |
| chr22 | +(22153079..22153598) | 519  | 1.95252 | 6   | 3  | 3  | 0         | 0.05       | YPEL1    | MAPK1        |
| chr22 | +(22218306..22219129) | 823  | 0.00229 | 15  | 9  | 6  | 0.2       | 0.00073136 | YPEL1    | MAPK1        |
| chr22 | +(22676819..22677335) | 516  | 0.95339 | 9   | 4  | 5  | 0.1111111 | 0.016      | LOC96610 | ZNF280B      |
| chr22 | +(22989928..22990450) | 522  | 1.95252 | 7   | 3  | 4  | 0.1428571 | 0.029      | GGTLC2   | MIR650       |
| chr22 | +(23969410..23969972) | 562  | 1.95252 | 6   | 2  | 4  | 0.3333333 | 0.067      | IGLL1    | C22orf43     |
| chr22 | +(24483283..24483830) | 547  | 1.95252 | 6   | 2  | 4  | 0.3333333 | 0.067      | CABIN1   | SUSD2        |
| chr22 | +(24511515..24512208) | 693  | 1.95252 | 9   | 6  | 3  | 0.3333333 | 0.988      | CABIN1   | SUSD2        |
| chr22 | +(24640219..24640794) | 575  | 0.95339 | 7   | 3  | 4  | 0.1428571 | 0.029      | SUSD2    | GGT5         |

|       |                       |      |         |    |    |    |           |            |          |           |   |
|-------|-----------------------|------|---------|----|----|----|-----------|------------|----------|-----------|---|
| chr22 | +(24709143..24709652) | 509  | 1.95252 | 6  | 4  | 2  | 0.3333333 | 0.067      | SPECC1L  | ADORA2A   |   |
| chr22 | +(25019743..25020364) | 621  | 0.95339 | 15 | 10 | 5  | 0.3333333 | 0.00505617 | C22orf36 | BCRP3     |   |
| chr22 | +(25024466..25025165) | 699  | 0.06575 | 35 | 12 | 23 | 0.3142857 | 0.00413086 | C22orf36 | BCRP3     |   |
| chr22 | +(25265354..25265876) | 522  | 1.95252 | 7  | 4  | 3  | 0.1428571 | 0.029      | SGSM1    | TMEM211   |   |
| chr22 | +(29597631..29598267) | 636  | 0.03801 | 11 | 5  | 6  | 0.0909091 | 0.00308495 | KREMEN1  | EMID1     |   |
| chr22 | +(29620728..29621277) | 549  | 1.95252 | 6  | 2  | 4  | 0.3333333 | 0.067      | EMID1    | RHBDD3    |   |
| chr22 | +(29885619..29886178) | 559  | 0.95339 | 15 | 8  | 7  | 0.0666667 | 0.08245742 | NEFH     | THOC5     |   |
| chr22 | +(29888571..29889121) | 550  | 0.0754  | 10 | 5  | 5  | 0         | 0.00451172 | NEFH     | THOC5     |   |
| chr22 | +(30189270..30189945) | 675  | 0.0754  | 10 | 6  | 4  | 0.2       | 0.005      | UQCR10   | ASCC2     |   |
| chr22 | +(32109109..32109794) | 685  | 1.95252 | 15 | 6  | 9  | 0.2       | 0.00921106 | PISD     | C22orf30  |   |
| chr22 | +(32753836..32754431) | 595  | 0.39879 | 10 | 3  | 7  | 0.4       | 0.192      | RFPL3    | RFPL3S    |   |
| chr22 | +(33309563..33310097) | 534  | 1.95252 | 6  | 2  | 4  | 0.3333333 | 0.067      | FBXO7    | SYN3      |   |
| chr22 | +(35659569..35660204) | 635  | 0.95339 | 9  | 4  | 5  | 0.1111111 | 0.032      | HMGXB4   | TOM1      |   |
| chr22 | +(35942655..35943355) | 700  | 0.16964 | 13 | 4  | 9  | 0.3846154 | 0.793      | RASD2    | MB        |   |
| chr22 | +(36694681..36695235) | 554  | 1.95252 | 8  | 3  | 5  | 0.25      | 0.286      | APOL1    | MYH9      |   |
| chr22 | +(37545085..37546077) | 992  | 0.0754  | 17 | 7  | 10 | 0.1764706 | 0.00031815 | TMPRSS6  | IL2RB     |   |
| chr22 | +(37581027..37581529) | 502  | 0.95339 | 7  | 4  | 3  | 0.1428571 | 0.029      | IL2RB    | C1QTNF6   |   |
| chr22 | +(37766771..37767404) | 633  | 0.39879 | 8  | 5  | 3  | 0.25      | 0.018      | CYTH4    | ELFN2     |   |
| chr22 | +(37844059..37844735) | 676  | 1.95252 | 6  | 2  | 4  | 0.3333333 | 0.067      | ELFN2    | MFNG      |   |
| chr22 | +(38081605..38082770) | 1165 | 1.95252 | 12 | 7  | 5  | 0.1666667 | 0.97882147 | LGALS1   | NOL12     |   |
| chr22 | +(38779187..38779885) | 698  | 0.16964 | 9  | 6  | 3  | 0.3333333 | 0.012      | CSNK1E   | LOC400927 |   |
| chr22 | +(38902109..38902809) | 700  | 0.0049  | 18 | 10 | 8  | 0.1111111 | 0.23859831 | KDEL3    | DDX17     |   |
| chr22 | +(39176849..39177398) | 549  | 0.95339 | 7  | 4  | 3  | 0.1428571 | 0.029      | SUN2     | DNAL4     |   |
| chr22 | +(39387374..39387892) | 518  | 1.95252 | 11 | 4  | 7  | 0.2727273 | 0.021      | APOBEC3B | APOBEC3C  |   |
| chr22 | +(39988117..39989291) | 1174 | 0.01468 | 19 | 11 | 8  | 0.1578947 | 0.83912483 | CACNA1I  | ENTHD1    |   |
| chr22 | +(40040899..40041540) | 641  | 1.95252 | 6  | 4  | 2  | 0.3333333 | 0.067      | CACNA1I  | ENTHD1    |   |
| chr22 | +(41572909..41573537) | 628  | 0.95339 | 11 | 4  | 7  | 0.2727273 | 0.536      | EP300    | L3MBTL2   |   |
| chr22 | +(42072604..42073266) | 662  | 0.95339 | 17 | 9  | 8  | 0.0588235 | 0.00352682 | XRCC6    | NHP2L1    |   |
| chr22 | +(42388399..42388999) | 600  | 0.39879 | 9  | 3  | 6  | 0.3333333 | 0.012      | 41155    | WBP2NL    |   |
| chr22 | +(42422590..42423373) | 783  | 0.03801 | 17 | 11 | 6  | 0.2941176 | 0.06583401 | WBP2NL   | NAGA      |   |
| chr22 | +(42606268..42607144) | 876  | 0.01468 | 26 | 13 | 13 | 0         | 0.00742745 | CYP2D7P1 | TCF20     | v |
| chr22 | +(42607164..42607844) | 680  | 0.39879 | 10 | 7  | 3  | 0.4       | 0.017      | CYP2D7P1 | TCF20     | v |
| chr22 | +(42950837..42951375) | 538  | 3.79571 | 15 | 6  | 9  | 0.2       | 0.03854994 | SERHL2   | RRP7B     |   |
| chr22 | +(43627026..43627832) | 806  | 0.0049  | 15 | 8  | 7  | 0.0666667 | 0.00754363 | TLL12    | SCUBE1    |   |

|       |                       |      |         |    |    |    |           |            |           |          |
|-------|-----------------------|------|---------|----|----|----|-----------|------------|-----------|----------|
| chr22 | +(43678743..43679248) | 505  | 0.95339 | 7  | 3  | 4  | 0.1428571 | 0.029      | TLL12     | SCUBE1   |
| chr22 | +(43786698..43787396) | 698  | 0.16964 | 9  | 6  | 3  | 0.3333333 | 0.012      | SCUBE1    | MPPED1   |
| chr22 | +(44235345..44235985) | 640  | 0.0754  | 15 | 10 | 5  | 0.3333333 | 0.13517207 | EFCAB6    | SULT4A1  |
| chr22 | +(44687316..44688016) | 700  | 1.95252 | 11 | 5  | 6  | 0.0909091 | 0.00308495 | PARVG     | KIAA1644 |
| chr22 | +(44848857..44849428) | 571  | 1.95252 | 6  | 2  | 4  | 0.3333333 | 0.067      | KIAA1644  | LDOC1L   |
| chr22 | +(45758483..45759224) | 741  | 0.03801 | 12 | 6  | 6  | 0         | 0.00197388 | FAM118A   | SMC1B    |
| chr22 | +(45802313..45802846) | 533  | 1.95252 | 6  | 4  | 2  | 0.3333333 | 0.067      | FAM118A   | SMC1B    |
| chr22 | +(46273197..46273842) | 645  | 1.95252 | 6  | 4  | 2  | 0.3333333 | 0.067      | ATXN10    | WNT7B    |
| chr22 | +(46311456..46312156) | 700  | 0.16964 | 9  | 6  | 3  | 0.3333333 | 0.012      | ATXN10    | WNT7B    |
| chr22 | +(46317660..46318184) | 524  | 1.95252 | 6  | 2  | 4  | 0.3333333 | 0.067      | ATXN10    | WNT7B    |
| chr22 | +(46752458..46753429) | 971  | 1.95252 | 12 | 7  | 5  | 0.1666667 | 0.00926649 | TRMU      | CELSR1   |
| chr22 | +(46769440..46770091) | 651  | 0.0754  | 13 | 8  | 5  | 0.2307692 | 0.23210716 | TRMU      | CELSR1   |
| chr22 | +(47036053..47036754) | 701  | 0.00709 | 13 | 9  | 4  | 0.3846154 | 0.001      | GRAMD4    | CERK     |
| chr22 | +(47452499..47453002) | 503  | 0.39879 | 8  | 4  | 4  | 0         | 0.014      | TBC1D22A  | FLJ46257 |
| chr22 | +(47846215..47846779) | 564  | 0.95339 | 7  | 3  | 4  | 0.1428571 | 0.029      | TBC1D22A  | FLJ46257 |
| chr22 | +(50106056..50106756) | 700  | 0.16964 | 9  | 3  | 6  | 0.3333333 | 0.012      | C22orf34  | BRD1     |
| chr22 | +(50197239..50198565) | 1326 | 0.39879 | 17 | 9  | 8  | 0.0588235 | 0.000266   | C22orf34  | BRD1     |
| chr22 | +(50357668..50358368) | 700  | 0.95339 | 9  | 5  | 4  | 0.1111111 | 0.008      | PIM3      | IL17REL  |
| chr22 | +(50551708..50552300) | 592  | 1.95252 | 9  | 3  | 6  | 0.3333333 | 0.274      | MOV10L1   | PANX2    |
| chr22 | +(50654777..50655310) | 533  | 1.95252 | 6  | 4  | 2  | 0.3333333 | 0.067      | SELO      | TUBGCP6  |
| chr22 | +(50784481..50785174) | 693  | 0.03801 | 11 | 6  | 5  | 0.0909091 | 0.00308495 | PPP6R2    | SBF1     |
| chr22 | +(51152572..51153404) | 832  | 0.00229 | 15 | 8  | 7  | 0.0666667 | 0.00059687 | SHANK3    | ACR      |
| chr22 | +(51167088..51167738) | 650  | 0.95339 | 9  | 4  | 5  | 0.1111111 | 0.365      | SHANK3    | ACR      |
| chrX  | +(3239598..3240368)   | 770  | 0.00121 | 23 | 11 | 12 | 0.0434783 | 0.24920196 | ARSF      | MXRA5    |
| chrX  | +(3241083..3241610)   | 527  | 3.74219 | 5  | 3  | 2  | 0.2       | 0.1        | ARSF      | MXRA5    |
| chrX  | +(3363086..3363786)   | 700  | 0.073   | 9  | 4  | 5  | 0.1111111 | 0.008      | MXRA5     | PRKX     |
| chrX  | +(5223824..5224524)   | 700  | 3.74219 | 8  | 3  | 5  | 0.25      | 0.125      | LOC389906 | NLGN4X   |
| chrX  | +(5821333..5821841)   | 508  | 3.74219 | 6  | 2  | 4  | 0.3333333 | 0.4        | LOC389906 | NLGN4X   |
| chrX  | +(7023524..7024055)   | 531  | 1.41465 | 6  | 3  | 3  | 0         | 0.05       | VCX3A     | HDHD1    |
| chrX  | +(8507483..8508103)   | 620  | 1.41465 | 8  | 4  | 4  | 0         | 0.014      | VCX3B     | KAL1     |
| chrX  | +(8763241..8763746)   | 505  | 0.19635 | 9  | 4  | 5  | 0.1111111 | 0.008      | KAL1      | FAM9A    |
| chrX  | +(10085076..10085776) | 700  | 0.52234 | 8  | 4  | 4  | 0         | 0.014      | WWC3      | CLCN4    |
| chrX  | +(10165743..10166438) | 695  | 0.073   | 13 | 8  | 5  | 0.2307692 | 0.0017074  | CLCN4     | MID1     |
| chrX  | +(10174141..10175203) | 1062 | 1.41465 | 16 | 9  | 7  | 0.125     | 0.93758876 | CLCN4     | MID1     |

|      |                       |      |         |    |    |    |           |            |              |         |
|------|-----------------------|------|---------|----|----|----|-----------|------------|--------------|---------|
| chrX | +(10463483..10464046) | 563  | 3.74219 | 6  | 4  | 2  | 0.3333333 | 0.067      | CLCN4        | MID1    |
| chrX | +(11042884..11043435) | 551  | 0.52234 | 7  | 3  | 4  | 0.1428571 | 0.029      | MID1         | HCCS    |
| chrX | +(11159949..11160498) | 549  | 1.41465 | 6  | 3  | 3  | 0         | 0.05       | HCCS         | ARHGAP6 |
| chrX | +(11781453..11782135) | 682  | 0.52234 | 12 | 4  | 8  | 0.3333333 | 0.055      | MSL3         | FRMPD4  |
| chrX | +(12722205..12722742) | 537  | 1.41465 | 6  | 2  | 4  | 0.3333333 | 0.067      | FRMPD4       | PRPS2   |
| chrX | +(12993095..12993992) | 897  | 1.41465 | 11 | 5  | 6  | 0.0909091 | 0.00308495 | TLR8         | TMSL3   |
| chrX | +(13635675..13636568) | 893  | 0.01092 | 20 | 10 | 10 | 0         | 0.00325085 | EGFL6        | TCEANC  |
| chrX | +(13774597..13775123) | 526  | 4.03702 | 13 | 5  | 8  | 0.2307692 | 0.05367327 | OFD1         | GPM6B   |
| chrX | +(13785984..13786492) | 508  | 4.03702 | 9  | 6  | 3  | 0.3333333 | 0.012      | OFD1         | GPM6B   |
| chrX | +(15408033..15408565) | 532  | 1.41465 | 7  | 3  | 4  | 0.1428571 | 0.029      | FIGF         | PIR     |
| chrX | +(15497559..15498214) | 655  | 0.2884  | 14 | 8  | 6  | 0.1428571 | 0.00225435 | FIGF         | PIR     |
| chrX | +(15838180..15838847) | 667  | 0.52234 | 11 | 7  | 4  | 0.2727273 | 0.006      | ZRSR2        | AP1S2   |
| chrX | +(16716159..16716669) | 510  | 0.52234 | 7  | 3  | 4  | 0.1428571 | 0.029      | GRPR         | CTPS2   |
| chrX | +(16759473..16760130) | 657  | 1.41465 | 9  | 3  | 6  | 0.3333333 | 0.012      | SYAP1        | TXLNG   |
| chrX | +(16855261..16856055) | 794  | 0.03356 | 14 | 7  | 7  | 0         | 0.02382272 | TXLNG        | RBBP7   |
| chrX | +(16863756..16864312) | 556  | 1.41465 | 6  | 3  | 3  | 0         | 0.05       | TXLNG        | RBBP7   |
| chrX | +(16887215..16887764) | 549  | 3.74219 | 7  | 4  | 3  | 0.1428571 | 0.057      | TXLNG        | RBBP7   |
| chrX | +(17080196..17080857) | 661  | 3.74219 | 8  | 3  | 5  | 0.25      | 0.286      | REPS2        | NHS     |
| chrX | +(17083419..17084119) | 700  | 0.03356 | 10 | 7  | 3  | 0.4       | 0.008      | REPS2        | NHS     |
| chrX | +(18341906..18342551) | 645  | 0.52234 | 9  | 6  | 3  | 0.3333333 | 0.048      | BEND2        | SCML2   |
| chrX | +(18356565..18357212) | 647  | 1.41465 | 13 | 7  | 6  | 0.0769231 | 0.0992714  | BEND2        | SCML2   |
| chrX | +(18456012..18456922) | 910  | 0.52234 | 13 | 8  | 5  | 0.2307692 | 0.01405402 | CDKL5        | RS1     |
| chrX | +(18969016..18969716) | 700  | 0.073   | 13 | 7  | 6  | 0.0769231 | 0.02275014 | LOC100132163 | PHKA2   |
| chrX | +(19031598..19032111) | 513  | 3.74219 | 7  | 3  | 4  | 0.1428571 | 0.314      | PHKA2        | GPR64   |
| chrX | +(19041925..19042517) | 592  | 1.41465 | 9  | 6  | 3  | 0.3333333 | 0.012      | PHKA2        | GPR64   |
| chrX | +(20194363..20194881) | 518  | 3.74219 | 8  | 4  | 4  | 0         | 0.057      | SCARNA9L     | RPS6KA3 |
| chrX | +(21366589..21367413) | 824  | 0.00513 | 12 | 5  | 7  | 0.1666667 | 0.00224163 | RPS6KA3      | CNKSR2  |
| chrX | +(21581378..21581912) | 534  | 3.74219 | 9  | 5  | 4  | 0.1111111 | 0.278      | CNKSR2       | KLHL34  |
| chrX | +(21619099..21619860) | 761  | 0.08034 | 29 | 19 | 10 | 0.3103448 | 8.4139E-05 | CNKSR2       | KLHL34  |
| chrX | +(21876340..21876883) | 543  | 0.52234 | 14 | 5  | 9  | 0.2857143 | 0.15865525 | YY2          | SMS     |
| chrX | +(22010462..22010977) | 515  | 3.74219 | 6  | 3  | 3  | 0         | 0.05       | SMS          | PHEX    |
| chrX | +(22235898..22236482) | 584  | 3.74219 | 5  | 2  | 3  | 0.2       | 0.1        | PHEX         | ZNF645  |
| chrX | +(23017364..23018293) | 929  | 0.073   | 15 | 10 | 5  | 0.3333333 | 0.00715294 | ZNF645       | DDX53   |
| chrX | +(23019260..23020742) | 1482 | 0.00513 | 42 | 22 | 20 | 0.047619  | 0.00221481 | DDX53        | PTCHD1  |

|      |                       |      |         |    |    |    |           |            |          |          |
|------|-----------------------|------|---------|----|----|----|-----------|------------|----------|----------|
| chrX | +(23021230..23021780) | 550  | 3.74219 | 6  | 2  | 4  | 0.3333333 | 0.067      | DDX53    | PTCHD1   |
| chrX | +(23411386..23411908) | 522  | 3.74219 | 8  | 5  | 3  | 0.25      | 0.071      | PTCHD1   | PRDX4    |
| chrX | +(24382670..24383193) | 523  | 3.74219 | 6  | 4  | 2  | 0.3333333 | 0.133      | FAM48B1  | PDK3     |
| chrX | +(24740795..24741594) | 799  | 0.52234 | 12 | 5  | 7  | 0.1666667 | 0.00224163 | POLA1    | SCARNA23 |
| chrX | +(26213157..26213850) | 693  | 0.19635 | 15 | 5  | 10 | 0.3333333 | 0.04320538 | MAGEB6   | VENTXP1  |
| chrX | +(27839169..27839866) | 697  | 1.41465 | 8  | 4  | 4  | 0         | 0.014      | MAGEB10  | DCAF8L1  |
| chrX | +(27998792..27999396) | 604  | 0.19635 | 13 | 6  | 7  | 0.0769231 | 0.04323814 | MAGEB10  | DCAF8L1  |
| chrX | +(28807227..28807860) | 633  | 1.41465 | 9  | 6  | 3  | 0.3333333 | 0.083      | IL1RAPL1 | MAGEB2   |
| chrX | +(30237261..30238539) | 1278 | 3.74219 | 19 | 13 | 6  | 0.3684211 | 0.19022756 | MAGEB2   | MAGEB3   |
| chrX | +(30648620..30649320) | 700  | 0.073   | 11 | 4  | 7  | 0.2727273 | 0.003      | CXorf21  | GK       |
| chrX | +(30725163..30726147) | 984  | 0.00024 | 33 | 19 | 14 | 0.1515152 | 1.0138E-05 | GK       | TAB3     |
| chrX | +(30738847..30739352) | 505  | 1.41465 | 6  | 4  | 2  | 0.3333333 | 0.067      | GK       | TAB3     |
| chrX | +(30814585..30815285) | 700  | 0.19635 | 8  | 3  | 5  | 0.25      | 0.018      | GK       | TAB3     |
| chrX | +(30873230..30873733) | 503  | 3.74219 | 8  | 3  | 5  | 0.25      | 0.607      | GK       | TAB3     |
| chrX | +(32591718..32592251) | 533  | 0.52234 | 8  | 4  | 4  | 0         | 0.014      | FTHL17   | DMD      |
| chrX | +(33501495..33502004) | 509  | 0.52234 | 7  | 3  | 4  | 0.1428571 | 0.029      | DMD      | FAM47A   |
| chrX | +(34147932..34148468) | 536  | 3.74219 | 7  | 4  | 3  | 0.1428571 | 0.057      | DMD      | FAM47A   |
| chrX | +(34181350..34182045) | 695  | 3.74219 | 9  | 5  | 4  | 0.1111111 | 0.992      | FAM47A   | TMEM47   |
| chrX | +(34812209..34813319) | 1110 | 0.52234 | 12 | 5  | 7  | 0.1666667 | 0.00224163 | TMEM47   | FAM47B   |
| chrX | +(34961178..34962247) | 1069 | 0.52234 | 17 | 11 | 6  | 0.2941176 | 0.65616355 | FAM47B   | MAGEB16  |
| chrX | +(35820032..35820587) | 555  | 3.74219 | 6  | 4  | 2  | 0.3333333 | 0.133      | MAGEB16  | CXorf22  |
| chrX | +(37026549..37027110) | 561  | 0.2884  | 15 | 10 | 5  | 0.3333333 | 0.01374317 | FAM47C   | PRRG1    |
| chrX | +(37027896..37028701) | 805  | 0.03356 | 27 | 17 | 10 | 0.2592593 | 0.09586971 | FAM47C   | PRRG1    |
| chrX | +(39714797..39715814) | 1017 | 3.74219 | 10 | 5  | 5  | 0         | 0.00451172 | MID1IP1  | BCOR     |
| chrX | +(39921720..39922402) | 682  | 1.41465 | 12 | 6  | 6  | 0         | 0.01248734 | MID1IP1  | BCOR     |
| chrX | +(40157654..40158354) | 700  | 0.073   | 9  | 6  | 3  | 0.3333333 | 0.012      | BCOR     | ATP6AP2  |
| chrX | +(41074827..41076096) | 1269 | 0.19635 | 20 | 10 | 10 | 0         | 0.58970208 | USP9X    | DDX3X    |
| chrX | +(41530345..41530982) | 637  | 1.41465 | 10 | 4  | 6  | 0.2       | 0.005      | NYX      | CASK     |
| chrX | +(41587294..41588551) | 1257 | 0.073   | 28 | 15 | 13 | 0.0714286 | 0.21008005 | NYX      | CASK     |
| chrX | +(43586627..43587584) | 957  | 0.52234 | 13 | 7  | 6  | 0.0769231 | 0.00213737 | MAOA     | MAOB     |
| chrX | +(43595242..43595767) | 525  | 3.74219 | 7  | 3  | 4  | 0.1428571 | 0.057      | MAOA     | MAOB     |
| chrX | +(43887785..43888729) | 944  | 0.52234 | 12 | 5  | 7  | 0.1666667 | 0.00224163 | NDP      | EFHC2    |
| chrX | +(44107229..44108093) | 864  | 3.74219 | 10 | 5  | 5  | 0         | 0.54159253 | NDP      | EFHC2    |
| chrX | +(44918118..44918649) | 531  | 1.41465 | 7  | 4  | 3  | 0.1428571 | 0.114      | KDM6A    | CXorf36  |

v



|      |                       |      |         |    |    |    |           |            |              |         |
|------|-----------------------|------|---------|----|----|----|-----------|------------|--------------|---------|
| chrX | +(44938479..44939021) | 542  | 3.74219 | 10 | 5  | 5  | 0         | 0.23235105 | KDM6A        | CXorf36 |
| chrX | +(44941731..44942265) | 534  | 3.74219 | 5  | 2  | 3  | 0.2       | 0.1        | KDM6A        | CXorf36 |
| chrX | +(46510295..46510946) | 651  | 1.41465 | 10 | 4  | 6  | 0.2       | 0.057      | CHST7        | SLC9A7  |
| chrX | +(46696169..46696789) | 620  | 3.74219 | 5  | 2  | 3  | 0.2       | 0.1        | SLC9A7       | RP2     |
| chrX | +(47099138..47099762) | 624  | 3.74219 | 6  | 2  | 4  | 0.3333333 | 0.133      | USP11        | ZNF157  |
| chrX | +(47100481..47101041) | 560  | 1.41465 | 6  | 3  | 3  | 0         | 0.05       | USP11        | ZNF157  |
| chrX | +(47158106..47158772) | 666  | 0.52234 | 7  | 3  | 4  | 0.1428571 | 0.029      | USP11        | ZNF157  |
| chrX | +(47447570..47448270) | 700  | 0.03356 | 10 | 7  | 3  | 0.4       | 0.008      | ARAF         | SYN1    |
| chrX | +(47495985..47496536) | 551  | 3.74219 | 6  | 2  | 4  | 0.3333333 | 0.067      | CFP          | ELK1    |
| chrX | +(47919484..47920005) | 521  | 3.74219 | 5  | 2  | 3  | 0.2       | 0.1        | SPACA5B_dup1 | ZNF630  |
| chrX | +(47925978..47926506) | 528  | 1.41465 | 10 | 4  | 6  | 0.2       | 0.086      | SPACA5B_dup1 | ZNF630  |
| chrX | +(47991412..47992366) | 954  | 0.00694 | 43 | 28 | 15 | 0.3023256 | 2.5424E-05 | SPACA5B_dup2 | SSX5    |
| chrX | +(48018449..48019043) | 594  | 0.52234 | 10 | 7  | 3  | 0.4       | 0.008      | SPACA5B_dup2 | SSX5    |
| chrX | +(48023981..48024485) | 504  | 3.74219 | 11 | 6  | 5  | 0.0909091 | 0.00308495 | SPACA5B_dup2 | SSX5    |
| chrX | +(48047087..48047609) | 522  | 1.41465 | 15 | 6  | 9  | 0.2       | 0.01257238 | SPACA5B_dup2 | SSX5    |
| chrX | +(48054055..48054706) | 651  | 0.073   | 15 | 8  | 7  | 0.0666667 | 0.02457042 | SPACA5B_dup2 | SSX5    |
| chrX | +(48071828..48072342) | 514  | 3.74219 | 15 | 10 | 5  | 0.3333333 | 0.00505617 | SSX5         | SSX1    |
| chrX | +(48073944..48074479) | 535  | 0.19635 | 15 | 8  | 7  | 0.0666667 | 0.01862128 | SSX5         | SSX1    |
| chrX | +(48117814..48118468) | 654  | 0.52234 | 14 | 5  | 9  | 0.2857143 | 0.0013499  | SSX1         | SSX3    |
| chrX | +(48136570..48137443) | 873  | 2.9E-07 | 50 | 20 | 30 | 0.2       | 8.2434E-07 | SSX1         | SSX3    |
| chrX | +(48158665..48159279) | 614  | 0.01092 | 16 | 5  | 11 | 0.375     | 0.09631901 | SSX1         | SSX3    |
| chrX | +(48160974..48161692) | 718  | 0.07018 | 27 | 15 | 12 | 0.1111111 | 0.02851994 | SSX1         | SSX3    |
| chrX | +(48162870..48164376) | 1506 | 0.00513 | 50 | 24 | 26 | 0.04      | 0.13002633 | SSX1         | SSX3    |
| chrX | +(48185832..48186453) | 621  | 0.00054 | 25 | 15 | 10 | 0.2       | 0.00094715 | SSX1         | SSX3    |
| chrX | +(48214062..48215102) | 1040 | 0.2884  | 40 | 17 | 23 | 0.15      | 0.0083336  | SSX1         | SSX3    |
| chrX | +(48299542..48300287) | 745  | 0.19635 | 14 | 7  | 7  | 0         | 0.00635813 | SSX4B_dup2   | SLC38A5 |
| chrX | +(48317895..48318508) | 613  | 0.81582 | 14 | 6  | 8  | 0.1428571 | 0.00225435 | SSX4B_dup2   | SLC38A5 |
| chrX | +(48455610..48456685) | 1075 | 0.19635 | 14 | 8  | 6  | 0.1428571 | 0.00097289 | RBM3         | WDR13   |
| chrX | +(48547478..48548061) | 583  | 3.74219 | 6  | 2  | 4  | 0.3333333 | 0.067      | WAS          | SUV39H1 |
| chrX | +(49103836..49104514) | 678  | 1.41465 | 6  | 4  | 2  | 0.3333333 | 0.067      | CCDC22       | FOXP3   |
| chrX | +(49113646..49114250) | 604  | 1.41465 | 8  | 3  | 5  | 0.25      | 0.018      | CCDC22       | FOXP3   |
| chrX | +(50376011..50376530) | 519  | 1.41465 | 8  | 5  | 3  | 0.25      | 0.125      | DGKK         | SHROOM4 |
| chrX | +(52591015..52591532) | 517  | 3.74219 | 7  | 3  | 4  | 0.1428571 | 0.029      | XAGE1E_dup5  | SSX8    |
| chrX | +(52637255..52638214) | 959  | 0.00513 | 28 | 18 | 10 | 0.2857143 | 0.00055637 | XAGE1E_dup5  | SSX8    |

|      |                       |      |         |    |    |    |           |            |             |           |
|------|-----------------------|------|---------|----|----|----|-----------|------------|-------------|-----------|
| chrX | +(52639786..52640532) | 746  | 0.19635 | 19 | 7  | 12 | 0.2631579 | 0.24948115 | XAGE1E_dup5 | SSX8      |
| chrX | +(52653671..52654498) | 827  | 0.70173 | 25 | 8  | 17 | 0.36      | 0.00368399 | SSX8        | SSX7      |
| chrX | +(52657178..52657816) | 638  | 1.00556 | 26 | 14 | 12 | 0.0769231 | 3.0118E-05 | SSX8        | SSX7      |
| chrX | +(52658935..52659480) | 545  | 0.19635 | 12 | 4  | 8  | 0.3333333 | 0.055      | SSX8        | SSX7      |
| chrX | +(52661755..52662274) | 519  | 1.41465 | 14 | 6  | 8  | 0.1428571 | 0.0070857  | SSX8        | SSX7      |
| chrX | +(52674039..52675071) | 1032 | 2E-06   | 49 | 20 | 29 | 0.1836735 | 0.01807589 | SSX8        | SSX7      |
| chrX | +(52679143..52679918) | 775  | 0.06317 | 30 | 21 | 9  | 0.4       | 0.002028   | SSX8        | SSX7      |
| chrX | +(52682115..52682894) | 779  | 7.6E-06 | 39 | 14 | 25 | 0.2820513 | 3.0238E-05 | SSX8        | SSX7      |
| chrX | +(52842123..52842634) | 511  | 3.74219 | 10 | 4  | 6  | 0.2       | 0.005      | XAGE5       | XAGE3     |
| chrX | +(52843929..52844468) | 539  | 1.41465 | 7  | 3  | 4  | 0.1428571 | 0.029      | XAGE5       | XAGE3     |
| chrX | +(52891218..52891732) | 514  | 3.74219 | 9  | 4  | 5  | 0.1111111 | 0.008      | XAGE5       | XAGE3     |
| chrX | +(53111895..53112595) | 700  | 0.52234 | 10 | 3  | 7  | 0.4       | 0.033      | TSPYL2      | KDM5C     |
| chrX | +(53116826..53117330) | 504  | 3.74219 | 6  | 4  | 2  | 0.3333333 | 0.067      | TSPYL2      | KDM5C     |
| chrX | +(53387878..53388666) | 788  | 0.19635 | 15 | 9  | 6  | 0.2       | 0.00073136 | IQSEC2      | SMC1A     |
| chrX | +(53438583..53439090) | 507  | 3.74219 | 6  | 3  | 3  | 0         | 0.05       | IQSEC2      | SMC1A     |
| chrX | +(53439963..53440485) | 522  | 1.41465 | 7  | 4  | 3  | 0.1428571 | 0.114      | IQSEC2      | SMC1A     |
| chrX | +(54107159..54107734) | 575  | 3.74219 | 5  | 2  | 3  | 0.2       | 0.1        | PHF8        | FAM120C   |
| chrX | +(54275498..54276031) | 533  | 1.41465 | 7  | 4  | 3  | 0.1428571 | 0.2        | FAM120C     | WNK3      |
| chrX | +(54277793..54278492) | 699  | 0.52234 | 12 | 7  | 5  | 0.1666667 | 0.18587565 | FAM120C     | WNK3      |
| chrX | +(54337377..54337996) | 619  | 3.74219 | 10 | 7  | 3  | 0.4       | 0.133      | FAM120C     | WNK3      |
| chrX | +(54975358..54975859) | 501  | 3.74219 | 7  | 3  | 4  | 0.1428571 | 0.314      | TRO         | PFKFB1    |
| chrX | +(56592036..56592587) | 551  | 1.41465 | 13 | 7  | 6  | 0.0769231 | 0.01606229 | UBQLN2      | LOC550643 |
| chrX | +(56763243..56763870) | 627  | 1.41465 | 12 | 6  | 6  | 0         | 0.00197388 | LOC550643   | LOC442454 |
| chrX | +(57162293..57162983) | 690  | 0.0508  | 38 | 20 | 18 | 0.0526316 | 0.03970532 | SPIN2B      | SPIN2A    |
| chrX | +(57621174..57621803) | 629  | 1.41465 | 10 | 5  | 5  | 0         | 0.23235105 | ZXDB        | ZXDA      |
| chrX | +(57622451..57623186) | 735  | 1.41465 | 14 | 8  | 6  | 0.1428571 | 0.5        | ZXDB        | ZXDA      |
| chrX | +(63443868..63444480) | 612  | 0.073   | 12 | 5  | 7  | 0.1666667 | 0.04407898 | FAM123B     | ASB12     |
| chrX | +(64547706..64548406) | 700  | 0.52234 | 9  | 5  | 4  | 0.1111111 | 0.016      | ZC4H2       | ZC3H12B   |
| chrX | +(64708971..64709553) | 582  | 3.74219 | 6  | 4  | 2  | 0.3333333 | 0.067      | ZC3H12B     | LAS1L     |
| chrX | +(67316509..67317043) | 534  | 1.41465 | 6  | 3  | 3  | 0         | 0.05       | AR          | OPHN1     |
| chrX | +(67433603..67434105) | 502  | 3.74219 | 10 | 4  | 6  | 0.2       | 0.619      | AR          | OPHN1     |
| chrX | +(67459640..67460218) | 578  | 3.74219 | 5  | 3  | 2  | 0.2       | 0.1        | AR          | OPHN1     |
| chrX | +(67940821..67941456) | 635  | 0.52234 | 9  | 5  | 4  | 0.1111111 | 0.008      | STARD8      | EFNB1     |
| chrX | +(68004058..68004595) | 537  | 1.31725 | 16 | 9  | 7  | 0.125     | 0.11174712 | STARD8      | EFNB1     |

|      |                       |      |         |    |    |   |           |            |              |            |
|------|-----------------------|------|---------|----|----|---|-----------|------------|--------------|------------|
| chrX | +(68059062..68059613) | 551  | 0.19635 | 8  | 4  | 4 | 0         | 0.014      | EFNB1        | PJA1       |
| chrX | +(68381325..68381833) | 508  | 3.74219 | 8  | 5  | 3 | 0.25      | 0.125      | EFNB1        | PJA1       |
| chrX | +(68382306..68383467) | 1161 | 3.74219 | 13 | 5  | 8 | 0.2307692 | 0.5        | EFNB1        | PJA1       |
| chrX | +(68420408..68421108) | 700  | 0.073   | 9  | 6  | 3 | 0.3333333 | 0.012      | PJA1         | FAM155B    |
| chrX | +(68434621..68435769) | 1148 | 0.073   | 17 | 9  | 8 | 0.0588235 | 0.999734   | PJA1         | FAM155B    |
| chrX | +(69263381..69263955) | 574  | 1.41465 | 9  | 5  | 4 | 0.1111111 | 0.008      | MIR676       | AWAT2      |
| chrX | +(69499993..69501104) | 1111 | 0.52234 | 14 | 6  | 8 | 0.1428571 | 0.12263906 | ARR3         | RAB41      |
| chrX | +(69503888..69504416) | 528  | 0.52234 | 8  | 5  | 3 | 0.25      | 0.125      | RAB41        | PDZD11     |
| chrX | +(69720157..69720701) | 544  | 1.41465 | 7  | 4  | 3 | 0.1428571 | 0.029      | DLG3         | TEX11      |
| chrX | +(70026145..70026805) | 660  | 1.41465 | 9  | 4  | 5 | 0.1111111 | 0.095      | DLG3         | TEX11      |
| chrX | +(70094100..70094810) | 710  | 0.01092 | 11 | 5  | 6 | 0.0909091 | 0.00308495 | DLG3         | TEX11      |
| chrX | +(70147625..70148159) | 534  | 3.74219 | 6  | 4  | 2 | 0.3333333 | 0.267      | TEX11        | SLC7A3     |
| chrX | +(70212060..70212921) | 861  | 0.03356 | 11 | 6  | 5 | 0.0909091 | 0.03394459 | SLC7A3       | SNX12      |
| chrX | +(70321380..70321999) | 619  | 0.073   | 10 | 4  | 6 | 0.2       | 0.005      | FOXO4        | CXorf65    |
| chrX | +(70493073..70493653) | 580  | 4.03702 | 8  | 5  | 3 | 0.25      | 0.018      | NLGN3        | BCYRN1     |
| chrX | +(70518092..70518625) | 533  | 1.41465 | 7  | 4  | 3 | 0.1428571 | 0.029      | NLGN3        | BCYRN1     |
| chrX | +(70616870..70617541) | 671  | 1.41465 | 8  | 3  | 5 | 0.25      | 0.125      | NLGN3        | BCYRN1     |
| chrX | +(70618207..70618726) | 519  | 1.41465 | 6  | 4  | 2 | 0.3333333 | 0.067      | NLGN3        | BCYRN1     |
| chrX | +(70778270..70779499) | 1229 | 0.52234 | 14 | 8  | 6 | 0.1428571 | 0.00097289 | NLGN3        | BCYRN1     |
| chrX | +(70782746..70783446) | 700  | 1.41465 | 10 | 7  | 3 | 0.4       | 0.058      | NLGN3        | BCYRN1     |
| chrX | +(70889878..70890453) | 575  | 3.74219 | 7  | 4  | 3 | 0.1428571 | 0.029      | NLGN3        | BCYRN1     |
| chrX | +(70934134..70935097) | 963  | 0.073   | 26 | 18 | 8 | 0.3846154 | 0.99675777 | NLGN3        | BCYRN1     |
| chrX | +(71034239..71034939) | 700  | 0.2884  | 12 | 7  | 5 | 0.1666667 | 0.00224163 | CXorf49_dup2 | NHSL2      |
| chrX | +(71093035..71093686) | 651  | 0.52234 | 12 | 4  | 8 | 0.3333333 | 0.077      | CXorf49_dup2 | NHSL2      |
| chrX | +(71363070..71363784) | 714  | 0.073   | 12 | 8  | 4 | 0.3333333 | 0.055      | RGAG4        | FLJ44635   |
| chrX | +(73405605..73406106) | 501  | 3.74219 | 7  | 4  | 3 | 0.1428571 | 0.314      | NCRNA00183   | NCRNA00182 |
| chrX | +(76854791..76855449) | 658  | 4.03702 | 12 | 6  | 6 | 0         | 0.00815459 | FGF16        | ATRX       |
| chrX | +(76871944..76872450) | 506  | 3.74219 | 10 | 5  | 5 | 0         | 0.23235105 | FGF16        | ATRX       |
| chrX | +(77111961..77112655) | 694  | 1.41465 | 8  | 5  | 3 | 0.25      | 0.125      | ATRX         | MAGT1      |
| chrX | +(77528290..77528936) | 646  | 3.74219 | 9  | 5  | 4 | 0.1111111 | 0.365      | TAF9B        | CYSLTR1    |
| chrX | +(79828452..79829063) | 611  | 3.74219 | 12 | 7  | 5 | 0.1666667 | 0.71511782 | FAM46D       | BRWD3      |
| chrX | +(79937828..79938363) | 535  | 3.74219 | 8  | 4  | 4 | 0         | 0.057      | FAM46D       | BRWD3      |
| chrX | +(79947174..79947802) | 628  | 0.52234 | 10 | 4  | 6 | 0.2       | 0.057      | FAM46D       | BRWD3      |
| chrX | +(79972807..79973364) | 557  | 3.74219 | 8  | 4  | 4 | 0         | 0.014      | FAM46D       | BRWD3      |

|      |                         |      |         |    |    |    |           |            |         |           |
|------|-------------------------|------|---------|----|----|----|-----------|------------|---------|-----------|
| chrX | +(79983909..79984609)   | 700  | 0.01092 | 13 | 4  | 9  | 0.3846154 | 0.001      | FAM46D  | BRWD3     |
| chrX | +(80310516..80311193)   | 677  | 1.41465 | 6  | 2  | 4  | 0.3333333 | 0.067      | BRWD3   | HMG5      |
| chrX | +(81836421..81836983)   | 562  | 0.19635 | 8  | 5  | 3  | 0.25      | 0.018      | SH3BGR1 | POU3F4    |
| chrX | +(82763927..82764927)   | 1000 | 0.52234 | 14 | 9  | 5  | 0.2857143 | 0.99018467 | POU3F4  | CYLC1     |
| chrX | +(83588501..83589061)   | 560  | 3.74219 | 6  | 2  | 4  | 0.3333333 | 0.267      | RPS6KA6 | HDX       |
| chrX | +(83724103..83724795)   | 692  | 0.81582 | 16 | 11 | 5  | 0.375     | 0.07837268 | RPS6KA6 | HDX       |
| chrX | +(85746446..85747146)   | 700  | 0.073   | 13 | 4  | 9  | 0.3846154 | 0.999      | DACH2   | KLHL4     |
| chrX | +(85969263..85969874)   | 611  | 0.52234 | 11 | 5  | 6  | 0.0909091 | 0.02230486 | DACH2   | KLHL4     |
| chrX | +(90692939..90693446)   | 507  | 4.03702 | 13 | 8  | 5  | 0.2307692 | 0.02021199 | PABPC5  | PCDH11X   |
| chrX | +(91137743..91138284)   | 541  | 0.52234 | 14 | 8  | 6  | 0.1428571 | 0.39812671 | PCDH11X | NAP1L3    |
| chrX | +(91873090..91873759)   | 669  | 0.19635 | 15 | 9  | 6  | 0.2       | 0.00921106 | PCDH11X | NAP1L3    |
| chrX | +(92408949..92409477)   | 528  | 3.74219 | 5  | 2  | 3  | 0.2       | 0.1        | PCDH11X | NAP1L3    |
| chrX | +(96122271..96122806)   | 535  | 0.52234 | 8  | 5  | 3  | 0.25      | 0.018      | DIAPH2  | RPA4      |
| chrX | +(96167034..96167734)   | 700  | 1.41465 | 10 | 4  | 6  | 0.2       | 0.033      | RPA4    | LOC442459 |
| chrX | +(96173354..96173869)   | 515  | 0.03356 | 12 | 8  | 4  | 0.3333333 | 0.036      | RPA4    | LOC442459 |
| chrX | +(96185563..96186113)   | 550  | 1.44534 | 11 | 7  | 4  | 0.2727273 | 0.006      | RPA4    | LOC442459 |
| chrX | +(96193907..96194410)   | 503  | 3.74219 | 10 | 5  | 5  | 0         | 0.00451172 | RPA4    | LOC442459 |
| chrX | +(96638476..96639003)   | 527  | 0.52234 | 10 | 3  | 7  | 0.4       | 0.417      | RPA4    | LOC442459 |
| chrX | +(100486279..100486979) | 700  | 1.41465 | 6  | 2  | 4  | 0.3333333 | 0.067      | DRP2    | TAF7L     |
| chrX | +(100536940..100537481) | 541  | 3.74219 | 10 | 7  | 3  | 0.4       | 0.192      | DRP2    | TAF7L     |
| chrX | +(101908907..101909447) | 540  | 3.74219 | 6  | 4  | 2  | 0.3333333 | 0.067      | GPRASP1 | GPRASP2   |
| chrX | +(101912205..101912708) | 503  | 3.74219 | 7  | 4  | 3  | 0.1428571 | 0.114      | GPRASP1 | GPRASP2   |
| chrX | +(101971569..101972081) | 512  | 3.74219 | 8  | 4  | 4  | 0         | 0.243      | GPRASP2 | BHLHB9    |
| chrX | +(102006059..102006578) | 519  | 3.74219 | 8  | 3  | 5  | 0.25      | 0.393      | BHLHB9  | RAB40A    |
| chrX | +(102006831..102007772) | 941  | 3.74219 | 35 | 18 | 17 | 0.0285714 | 0.02779186 | BHLHB9  | RAB40A    |
| chrX | +(102333136..102334123) | 987  | 9.2E-05 | 38 | 22 | 16 | 0.1578947 | 0.00975386 | BEX1    | NXF3      |
| chrX | +(102334217..102335286) | 1069 | 0.52234 | 24 | 9  | 15 | 0.25      | 0.00158061 | BEX1    | NXF3      |
| chrX | +(102967054..102967557) | 503  | 3.74219 | 7  | 4  | 3  | 0.1428571 | 0.114      | MORF4L2 | GLRA4     |
| chrX | +(102968404..102968973) | 569  | 1.41465 | 12 | 5  | 7  | 0.1666667 | 0.28488218 | MORF4L2 | GLRA4     |
| chrX | +(103040389..103040906) | 517  | 3.74219 | 7  | 3  | 4  | 0.1428571 | 0.2        | PLP1    | RAB9B     |
| chrX | +(103216122..103216943) | 821  | 0.00023 | 30 | 20 | 10 | 0.3333333 | 0.00414961 | RAB9B   | MIR1256   |
| chrX | +(106105910..106106428) | 518  | 1.41465 | 6  | 2  | 4  | 0.3333333 | 0.067      | TBC1D8B | RIPPLY1   |
| chrX | +(106113749..106114274) | 525  | 1.41465 | 9  | 3  | 6  | 0.3333333 | 0.012      | TBC1D8B | RIPPLY1   |
| chrX | +(106185652..106186293) | 641  | 1.41465 | 6  | 4  | 2  | 0.3333333 | 0.067      | CLDN2   | MORC4     |

|      |                         |     |         |    |   |    |           |            |         |          |
|------|-------------------------|-----|---------|----|---|----|-----------|------------|---------|----------|
| chrX | +(106356471..106356989) | 518 | 3.74219 | 7  | 4 | 3  | 0.1428571 | 0.029      | MORC4   | RBM41    |
| chrX | +(106394555..106395255) | 700 | 3.74219 | 8  | 3 | 5  | 0.25      | 0.982      | RBM41   | NUP62CL  |
| chrX | +(106921376..106922076) | 700 | 0.52234 | 11 | 7 | 4  | 0.2727273 | 0.997      | PRPS1   | TSC22D3  |
| chrX | +(106926323..106926910) | 587 | 3.74219 | 8  | 4 | 4  | 0         | 0.829      | PRPS1   | TSC22D3  |
| chrX | +(106959045..106959745) | 700 | 0.19635 | 8  | 3 | 5  | 0.25      | 0.018      | PRPS1   | TSC22D3  |
| chrX | +(107377247..107377886) | 639 | 0.52234 | 13 | 6 | 7  | 0.0769231 | 0.00757922 | ATG4A   | COL4A6   |
| chrX | +(110961114..110961809) | 695 | 0.52234 | 8  | 5 | 3  | 0.25      | 0.286      | ALG13   | TRPC5    |
| chrX | +(111202179..111202879) | 700 | 3.74219 | 8  | 5 | 3  | 0.25      | 0.982      | ALG13   | TRPC5    |
| chrX | +(113965800..113966407) | 607 | 1.41465 | 9  | 5 | 4  | 0.1111111 | 0.635      | MIR1298 | MIR1911  |
| chrX | +(114413831..114414341) | 510 | 1.41465 | 12 | 6 | 6  | 0         | 0.2609197  | IL13RA2 | LRCH2    |
| chrX | +(114609327..114610027) | 700 | 0.073   | 9  | 5 | 4  | 0.1111111 | 0.008      | LUZP4   | PLS3     |
| chrX | +(114874345..114875050) | 705 | 1.41465 | 10 | 5 | 5  | 0         | 0.0081468  | PLS3    | AGTR2    |
| chrX | +(114953061..114953761) | 700 | 0.52234 | 11 | 4 | 7  | 0.2727273 | 0.158      | PLS3    | AGTR2    |
| chrX | +(117521091..117521600) | 509 | 0.52234 | 10 | 4 | 6  | 0.2       | 0.019      | MIR1277 | DOCK11   |
| chrX | +(117699973..117700483) | 510 | 1.41465 | 13 | 6 | 7  | 0.0769231 | 0.00757922 | DOCK11  | IL13RA1  |
| chrX | +(117718457..117719008) | 551 | 0.52234 | 8  | 3 | 5  | 0.25      | 0.286      | DOCK11  | IL13RA1  |
| chrX | +(117732104..117732788) | 684 | 3.74219 | 8  | 5 | 3  | 0.25      | 0.982      | DOCK11  | IL13RA1  |
| chrX | +(117743035..117743792) | 757 | 0.01092 | 18 | 9 | 9  | 0         | 0.00017429 | DOCK11  | IL13RA1  |
| chrX | +(117748412..117748977) | 565 | 1.41465 | 11 | 7 | 4  | 0.2727273 | 0.012      | DOCK11  | IL13RA1  |
| chrX | +(117758182..117758792) | 610 | 4.66385 | 15 | 5 | 10 | 0.3333333 | 0.0330963  | DOCK11  | IL13RA1  |
| chrX | +(117769904..117770577) | 673 | 0.52234 | 12 | 5 | 7  | 0.1666667 | 0.85442389 | DOCK11  | IL13RA1  |
| chrX | +(118139729..118140674) | 945 | 0.52234 | 13 | 8 | 5  | 0.2307692 | 0.02021199 | LONRF3  | KIAA1210 |
| chrX | +(118220470..118221135) | 665 | 1.44534 | 16 | 6 | 10 | 0.25      | 0.02544691 | LONRF3  | KIAA1210 |
| chrX | +(118222794..118223444) | 650 | 1.41465 | 13 | 6 | 7  | 0.0769231 | 0.07656373 | LONRF3  | KIAA1210 |
| chrX | +(118893721..118894419) | 698 | 1.41465 | 9  | 4 | 5  | 0.1111111 | 0.095      | ANKRD58 | RPL39    |
| chrX | +(119572884..119573445) | 561 | 3.74219 | 5  | 2 | 3  | 0.2       | 0.1        | ATP1B4  | LAMP2    |
| chrX | +(119581678..119582306) | 628 | 3.74219 | 8  | 5 | 3  | 0.25      | 0.5        | ATP1B4  | LAMP2    |
| chrX | +(122536699..122537373) | 674 | 1.41465 | 11 | 7 | 4  | 0.2727273 | 0.036      | GRIA3   | THOC2    |
| chrX | +(122747115..122747815) | 700 | 0.03356 | 13 | 4 | 9  | 0.3846154 | 0.074      | GRIA3   | THOC2    |
| chrX | +(122754800..122755508) | 708 | 0.03356 | 16 | 7 | 9  | 0.125     | 0.01500531 | GRIA3   | THOC2    |
| chrX | +(122756593..122757126) | 533 | 3.74219 | 5  | 2 | 3  | 0.2       | 0.1        | GRIA3   | THOC2    |
| chrX | +(122757502..122758080) | 578 | 1.41465 | 13 | 7 | 6  | 0.0769231 | 0.28385458 | GRIA3   | THOC2    |
| chrX | +(123556039..123556616) | 577 | 3.74219 | 6  | 3 | 3  | 0         | 0.2        | SH2D1A  | ODZ1     |
| chrX | +(128700933..128701541) | 608 | 1.41465 | 8  | 3 | 5  | 0.25      | 0.018      | OCRL    | APLN     |

|      |                         |      |         |    |    |    |           |            |               |           |   |
|------|-------------------------|------|---------|----|----|----|-----------|------------|---------------|-----------|---|
| chrX | +(128788031..128788546) | 515  | 1.41465 | 6  | 4  | 2  | 0.3333333 | 0.067      | OCRL          | APLN      |   |
| chrX | +(128880628..128881150) | 522  | 1.41465 | 9  | 6  | 3  | 0.3333333 | 0.012      | XPNPEP2       | SASH3     |   |
| chrX | +(129199312..129200012) | 700  | 0.19635 | 8  | 5  | 3  | 0.25      | 0.018      | BCORL1        | ELF4      |   |
| chrX | +(129542998..129543516) | 518  | 4.03702 | 12 | 4  | 8  | 0.3333333 | 0.00328926 | RBMX2         | FAM45B    |   |
| chrX | +(129629091..129630467) | 1376 | 0.06317 | 51 | 17 | 34 | 0.3333333 | 0.11144811 | FAM45B        | ENOX2     |   |
| chrX | +(129630705..129631405) | 700  | 0.00024 | 33 | 17 | 16 | 0.030303  | 0.05648728 | FAM45B        | ENOX2     |   |
| chrX | +(129665188..129665888) | 700  | 0.073   | 9  | 6  | 3  | 0.3333333 | 0.012      | FAM45B        | ENOX2     |   |
| chrX | +(129790183..129790731) | 548  | 4.03702 | 12 | 4  | 8  | 0.3333333 | 0.184      | FAM45B        | ENOX2     |   |
| chrX | +(130408315..130409015) | 700  | 0.19635 | 12 | 4  | 8  | 0.3333333 | 0.00328926 | ARHGAP36      | IGSF1     |   |
| chrX | +(130416288..130416840) | 552  | 3.74219 | 5  | 3  | 2  | 0.2       | 0.1        | ARHGAP36      | IGSF1     |   |
| chrX | +(130678563..130679197) | 634  | 0.52234 | 9  | 5  | 4  | 0.1111111 | 0.206      | OR13H1        | LOC286467 |   |
| chrX | +(133379552..133380166) | 614  | 1.41465 | 6  | 4  | 2  | 0.3333333 | 0.067      | CCDC160       | PHF6      |   |
| chrX | +(135312470..135313026) | 556  | 0.19635 | 11 | 6  | 5  | 0.0909091 | 0.01422987 | FHL1          | MAP7D3    |   |
| chrX | +(135326405..135326935) | 530  | 3.74219 | 10 | 5  | 5  | 0         | 0.03790009 | FHL1          | MAP7D3    |   |
| chrX | +(140982876..140983434) | 558  | 1.41465 | 8  | 4  | 4  | 0         | 0.171      | MAGEC3        | MAGEC1    |   |
| chrX | +(140984011..140984998) | 987  | 0.19635 | 20 | 6  | 14 | 0.4       | 0.89198971 | MAGEC3        | MAGEC1    |   |
| chrX | +(140994157..140994865) | 708  | 0.81582 | 30 | 15 | 15 | 0         | 0.27377615 | MAGEC1        | MAGEC2    |   |
| chrX | +(140995351..140995935) | 584  | 1.41465 | 9  | 6  | 3  | 0.3333333 | 0.012      | MAGEC1        | MAGEC2    |   |
| chrX | +(142967073..142968510) | 1437 | 0.03356 | 40 | 26 | 14 | 0.3       | 0.93714429 | SPANXN2       | UBE2NL    |   |
| chrX | +(143991440..143992334) | 894  | 0.03356 | 12 | 5  | 7  | 0.1666667 | 0.00224163 | UBE2NL        | SPANXN1   |   |
| chrX | +(144255152..144255685) | 533  | 3.74219 | 8  | 3  | 5  | 0.25      | 0.018      | UBE2NL        | SPANXN1   |   |
| chrX | +(147003299..147003935) | 636  | 1.41465 | 8  | 5  | 3  | 0.25      | 0.286      | MIR514-3_dup2 | FMR1-AS1  |   |
| chrX | +(147013831..147014359) | 528  | 3.74219 | 9  | 3  | 6  | 0.3333333 | 0.19       | FMR1          | FMR1NB    |   |
| chrX | +(149943533..149944780) | 1247 | 0.073   | 16 | 9  | 7  | 0.125     | 0.00042755 | MTMR1         | CD99L2    | v |
| chrX | +(149984521..149985045) | 524  | 3.74219 | 9  | 5  | 4  | 0.1111111 | 0.206      | MTMR1         | CD99L2    | v |
| chrX | +(150099616..150100316) | 700  | 0.19635 | 8  | 5  | 3  | 0.25      | 0.018      | CD99L2        | HMGB3     | v |
| chrX | +(150793649..150794327) | 678  | 0.03356 | 11 | 7  | 4  | 0.2727273 | 0.036      | PASD1         | PRRG3     |   |
| chrX | +(150844325..150844958) | 633  | 0.52234 | 8  | 5  | 3  | 0.25      | 0.018      | PASD1         | PRRG3     |   |
| chrX | +(152127693..152128352) | 659  | 3.74219 | 6  | 3  | 3  | 0         | 0.35       | ZNF185        | PNMA5     |   |
| chrX | +(152613609..152614973) | 1364 | 0.073   | 25 | 15 | 10 | 0.2       | 0.05384858 | ZNF275        | ZFP92     |   |
| chrX | +(152731261..152731842) | 581  | 1.41465 | 10 | 6  | 4  | 0.2       | 0.995      | TREX2         | HAUS7     |   |
| chrX | +(152837075..152837730) | 655  | 3.74219 | 5  | 2  | 3  | 0.2       | 0.1        | ATP2B3        | FAM58A    |   |
| chrX | +(152853409..152854328) | 919  | 0.01092 | 26 | 18 | 8  | 0.3846154 | 0.13326027 | ATP2B3        | FAM58A    |   |
| chrX | +(152869941..152870474) | 533  | 3.74219 | 5  | 3  | 2  | 0.2       | 0.1        | FAM58A        | DUSP9     |   |

|      |                         |      |         |    |    |    |           |            |                 |              |
|------|-------------------------|------|---------|----|----|----|-----------|------------|-----------------|--------------|
| chrX | +(152877670..152878282) | 612  | 1.41465 | 6  | 3  | 3  | 0         | 0.05       | FAM58A          | DUSP9        |
| chrX | +(152935012..152935539) | 527  | 0.52234 | 12 | 8  | 4  | 0.3333333 | 0.533      | DUSP9           | PNCK         |
| chrX | +(152963508..152964083) | 575  | 1.41465 | 6  | 4  | 2  | 0.3333333 | 0.067      | SLC6A8          | BCAP31       |
| chrX | +(152966472..152966982) | 510  | 3.74219 | 5  | 2  | 3  | 0.2       | 0.1        | SLC6A8          | BCAP31       |
| chrX | +(153050568..153051126) | 558  | 3.74219 | 7  | 4  | 3  | 0.1428571 | 0.2        | SRPK3           | IDH3G        |
| chrX | +(153069911..153071011) | 1100 | 0.19635 | 14 | 9  | 5  | 0.2857143 | 0.0013499  | SSR4            | PDZD4        |
| chrX | +(153133660..153134170) | 510  | 3.74219 | 6  | 4  | 2  | 0.3333333 | 0.067      | PDZD4           | L1CAM        |
| chrX | +(153458665..153459206) | 541  | 4.03702 | 12 | 4  | 8  | 0.3333333 | 0.055      | OPN1MW_dup1     | OPN1MW2_dup2 |
| chrX | +(153461007..153461783) | 776  | 3.74219 | 11 | 5  | 6  | 0.0909091 | 0.02230486 | OPN1MW_dup1     | OPN1MW2_dup2 |
| chrX | +(153462802..153463371) | 569  | 0.81582 | 13 | 8  | 5  | 0.2307692 | 0.0394913  | OPN1MW_dup1     | OPN1MW2_dup2 |
| chrX | +(153499777..153500324) | 547  | 4.03702 | 14 | 5  | 9  | 0.2857143 | 0.03593032 | OPN1MW_dup2     | TEX28        |
| chrX | +(153579926..153580427) | 501  | 3.74219 | 6  | 3  | 3  | 0         | 0.05       | TKTL1           | FLNA         |
| chrX | +(153599029..153599721) | 692  | 0.19635 | 8  | 5  | 3  | 0.25      | 0.018      | TKTL1           | FLNA         |
| chrX | +(153663342..153664325) | 983  | 1.41465 | 12 | 7  | 5  | 0.1666667 | 0.08373231 | ATP6AP1         | GDI1         |
| chrX | +(153775366..153776066) | 700  | 1.41465 | 9  | 6  | 3  | 0.3333333 | 0.012      | FAM3A           | G6PD         |
| chrX | +(153880441..153880983) | 542  | 1.41465 | 10 | 6  | 4  | 0.2       | 0.057      | NCRNA00204_dup2 | CTAG2        |
| chrY | +(249158..249779)       | 621  | 1.74153 | 7  | 4  | 3  | 0.1428571 | 0.029      | NCRNA00107      | PPP2R3B      |
| chrY | +(272001..272690)       | 689  | 0.0116  | 9  | 5  | 4  | 0.1111111 | 0.008      | NCRNA00107      | PPP2R3B      |
| chrY | +(272752..273452)       | 700  | 0.00344 | 10 | 3  | 7  | 0.4       | 0.008      | NCRNA00107      | PPP2R3B      |
| chrY | +(273635..274503)       | 868  | 1.4E-05 | 23 | 9  | 14 | 0.2173913 | 0.2853752  | NCRNA00107      | PPP2R3B      |
| chrY | +(448173..448873)       | 700  | 0.03527 | 13 | 5  | 8  | 0.2307692 | 0.0017074  | PPP2R3B         | SHOX         |
| chrY | +(644513..645419)       | 906  | 0.0116  | 14 | 9  | 5  | 0.2857143 | 0.0013499  | SHOX            | CRLF2        |
| chrY | +(760611..761304)       | 693  | 0.11116 | 10 | 3  | 7  | 0.4       | 0.008      | SHOX            | CRLF2        |
| chrY | +(920383..920926)       | 543  | 1.9736  | 7  | 4  | 3  | 0.1428571 | 0.029      | SHOX            | CRLF2        |
| chrY | +(1277358..1278038)     | 680  | 0.00344 | 22 | 12 | 10 | 0.0909091 | 0.91692773 | SHOX            | CRLF2        |
| chrY | +(1351251..1351785)     | 534  | 4.16944 | 9  | 3  | 6  | 0.3333333 | 0.19       | CSF2RA          | MIR3690      |
| chrY | +(1364088..1364788)     | 700  | 0.03067 | 20 | 6  | 14 | 0.4       | 0.01599867 | MIR3690         | IL3RA        |
| chrY | +(1374005..1374861)     | 856  | 0.23333 | 24 | 15 | 9  | 0.25      | 0.00106719 | MIR3690         | IL3RA        |
| chrY | +(1458286..1458883)     | 597  | 0.54239 | 8  | 5  | 3  | 0.25      | 0.5        | IL3RA           | SLC25A6      |
| chrY | +(2134697..2135228)     | 531  | 1.0295  | 13 | 6  | 7  | 0.0769231 | 0.00332094 | ASMT            | DHRXS        |
| chrY | +(2266980..2267680)     | 700  | 0.00032 | 20 | 10 | 10 | 0         | 0.00124845 | ASMT            | DHRXS        |
| chrY | +(2582466..2582967)     | 501  | 1.25554 | 15 | 8  | 7  | 0.0666667 | 0.02457042 | CD99            | XGPY2        |
| chrY | +(2590362..2590992)     | 630  | 0.95714 | 18 | 11 | 7  | 0.2222222 | 0.00120674 | CD99            | XGPY2        |
| chrY | +(2591191..2591869)     | 678  | 0.54239 | 10 | 7  | 3  | 0.4       | 0.058      | CD99            | XGPY2        |

|      |                       |      |         |    |    |    |           |            |            |             |
|------|-----------------------|------|---------|----|----|----|-----------|------------|------------|-------------|
| chrY | +(4966629..4967206)   | 577  | 1.74153 | 7  | 3  | 4  | 0.1428571 | 0.057      | PCDH11Y    | TTY23B_dup1 |
| chrY | +(5368783..5369629)   | 846  | 0.03527 | 17 | 8  | 9  | 0.0588235 | 0.00807239 | PCDH11Y    | TTY23B_dup1 |
| chrY | +(5948971..5949617)   | 646  | 0.23029 | 17 | 8  | 9  | 0.0588235 | 0.000266   | PCDH11Y    | TTY23B_dup1 |
| chrY | +(21115598..21116298) | 700  | 0.03527 | 12 | 4  | 8  | 0.3333333 | 0.00328926 | NCRNA00185 | TTY14       |
| chrY | +(28740673..28741371) | 698  | 0.54239 | 9  | 4  | 5  | 0.1111111 | 0.032      | TTY3_dup2  | SPRY3       |
| chrY | +(58831118..58831634) | 516  | 1.74153 | 8  | 5  | 3  | 0.25      | 0.196      | TTY3_dup2  | SPRY3       |
| chrY | +(58867981..58868528) | 547  | 1.74153 | 5  | 2  | 3  | 0.2       | 0.1        | TTY3_dup2  | SPRY3       |
| chrY | +(58983156..58984362) | 1206 | 5.3E-06 | 27 | 11 | 16 | 0.1851852 | 7.0441E-06 | TTY3_dup2  | SPRY3       |
| chrY | +(58993211..58994517) | 1306 | 0.11116 | 32 | 10 | 22 | 0.375     | 0.99997604 | TTY3_dup2  | SPRY3       |
| chrY | +(59001681..59002245) | 564  | 0.05151 | 13 | 4  | 9  | 0.3846154 | 0.02       | TTY3_dup2  | SPRY3       |
| chrY | +(59107663..59108485) | 822  | 0.02787 | 27 | 12 | 15 | 0.1111111 | 0.04383441 | SPRY3      | VAMP7       |
| chrY | +(59228106..59228827) | 721  | 0.05403 | 20 | 12 | 8  | 0.2       | 0.00215447 | VAMP7      | IL9R        |
| chrY | +(59230462..59231162) | 700  | 0.0116  | 10 | 3  | 7  | 0.4       | 0.008      | VAMP7      | IL9R        |



**Supplementary Table S8.** The correlation between protein expression of Oct4 in relation to PTEN and TNC protein expression in lung cancer patients.\*

| Characteristics     | <u>Oct4 protein</u> |                            |                                |
|---------------------|---------------------|----------------------------|--------------------------------|
|                     | Total               | Normal expression<br>N (%) | Overexpression<br>N (%)        |
| Overall             | 133                 | 41 (30.8)                  | 92 (69.2)                      |
| <u>PTEN protein</u> | 133                 |                            |                                |
| Normal expression   | 52                  | 22 (42.3)                  | 18 (57.7)                      |
| Low expression      | 81                  | 19 (23.5)                  | 62 (76.5) <sup>0.022</sup>     |
| <u>TNC protein</u>  | 133                 |                            |                                |
| Normal expression   | 55                  | 30 (54.5)                  | 25 (45.5)                      |
| Overexpression      | 78                  | 11 (14.1)                  | 67 (85.9) <sup>&lt;0.001</sup> |

\* These results were analyzed by the Pearson  $\chi^2$  test. The *P* values with significance are shown as superscripts.

**Supplementary Table S9.** The correlation between protein expression of TNC in relation to both Oct4 and PTEN protein expression levels in lung cancer patients.\*

| Characteristics    | Oct4 and PTEN protein |                                                                 |                 |                                                           |
|--------------------|-----------------------|-----------------------------------------------------------------|-----------------|-----------------------------------------------------------|
|                    | Total                 | Oct4<br>Normal expression<br>PTEN<br>Normal expression<br>N (%) | Others<br>N (%) | Oct4<br>Overexpression<br>PTEN<br>Low expression<br>N (%) |
| Overall            | 133                   | 22 (100)                                                        | 49 (100)        | 62 (100)                                                  |
| <u>TNC protein</u> | 133                   |                                                                 |                 |                                                           |
| Normal expression  | 55                    | 16 (72.7)                                                       | 20 (40.8)       | 19 (30.6)                                                 |
| Overexpression     | 78                    | 6 (27.3)                                                        | 29 (59.2)       | 43 (69.4) <sup>0.003</sup>                                |

\* These results were analyzed by the Pearson  $\chi^2$  test. The *P* values with significance are shown as superscripts.
